# Supplementary material
Source: publisher figshare collection journal article supplement (https://frontiersin.figshare.com/ndownloader/files/24755375)

22/01/2020 10:25:33

Project 1

Rumania 1

Dorso 1 15 Kv

Electron Image 1

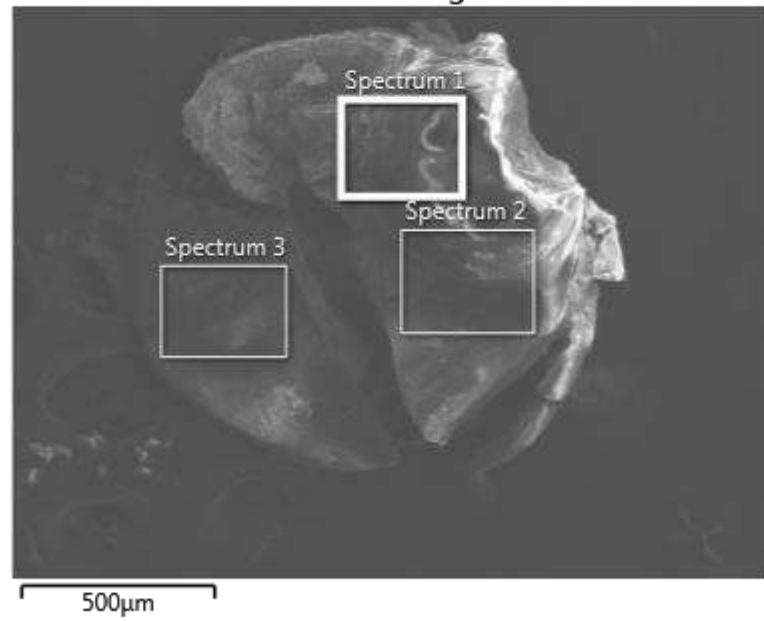

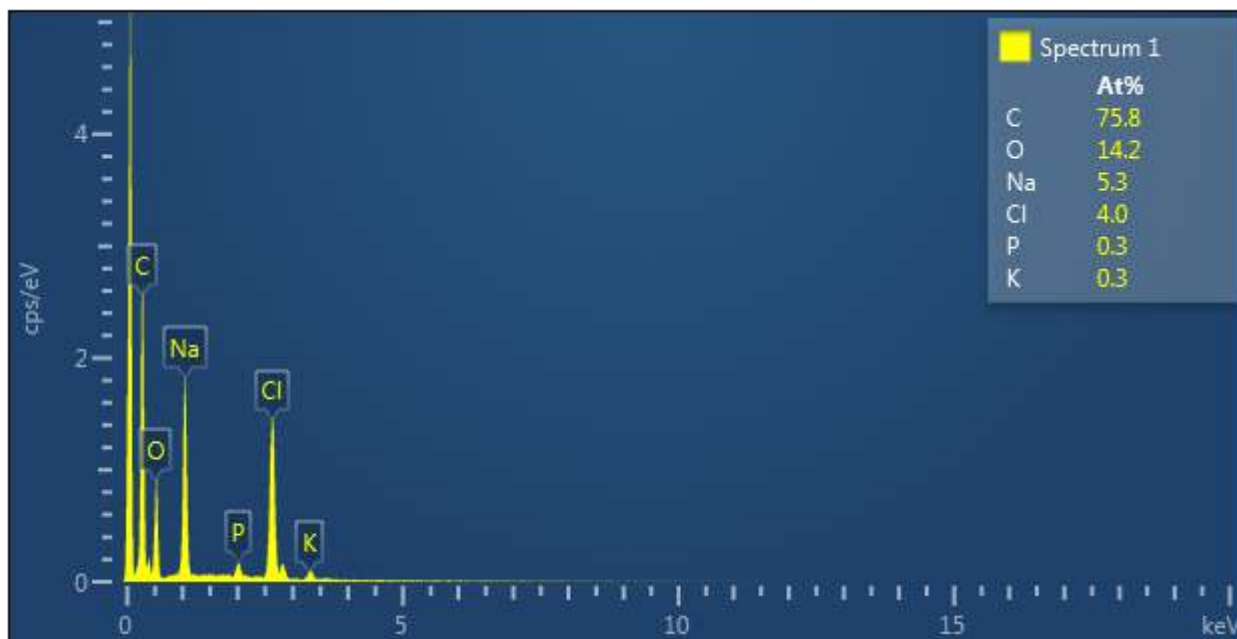

|                                 |                     |
|---------------------------------|---------------------|
| Label:                          | Spectrum 1          |
| Source:                         | Acquired            |
| Created:                        | 22/01/2020 10:25:33 |
| Livetime:                       | 60.5s               |
| Process Time:                   | 4                   |
| Accelerating Voltage:           | 15.00kV             |
| Magnification:                  | 57 x                |
| Working Distance:               | 10.0mm              |
| Specimen Tilt (degrees):        | 0.0                 |
| Elevation (degrees):            | 35.0                |
| Azimuth (degrees):              | 0.0                 |
| Number Of Channels:             | 2048                |
| Energy Range (keV):             | 20 keV              |
| Energy per Channel (eV):        | 10.0eV              |
| Detector Type Id:               | 29                  |
| Detector Type:                  | X-Max               |
| Window Type:                    | SATW                |
| Pulse Pile Up Correction:       | Succeeded           |
| Primary Detector:               | 2617                |
| Primary Detector Serial Number: | 77871-X080          |

| Element | Line Type | Apparent Concentration | k Ratio | Wt%   | Wt% Sigma | Atomic % | Standard Label | Factory Standard | Standard Calibration Date |
|---------|-----------|------------------------|---------|-------|-----------|----------|----------------|------------------|---------------------------|
| C       | K series  | 4.53                   | 0.04533 | 63.98 | 0.72      | 75.84    | C Vit          | Yes              |                           |
| O       | K series  | 2.53                   | 0.00852 | 16.01 | 0.49      | 14.25    | SiO2           | Yes              |                           |
| Na      | K         | 3.04                   | 0.0128  | 8.54  | 0.21      | 5.29     | Albite         | Yes              |                           |

|        |          |      |         |        |      |        |      |     |  |
|--------|----------|------|---------|--------|------|--------|------|-----|--|
|        | series   |      | 1       |        |      |        |      |     |  |
| P      | K series | 0.27 | 0.00149 | 0.67   | 0.06 | 0.31   | GaP  | Yes |  |
| Cl     | K series | 2.61 | 0.02282 | 10.02  | 0.24 | 4.03   | NaCl | Yes |  |
| K      | K series | 0.21 | 0.00174 | 0.78   | 0.07 | 0.28   | KBr  | Yes |  |
| Total: |          |      |         | 100.00 |      | 100.00 |      |     |  |

Electron Image 1

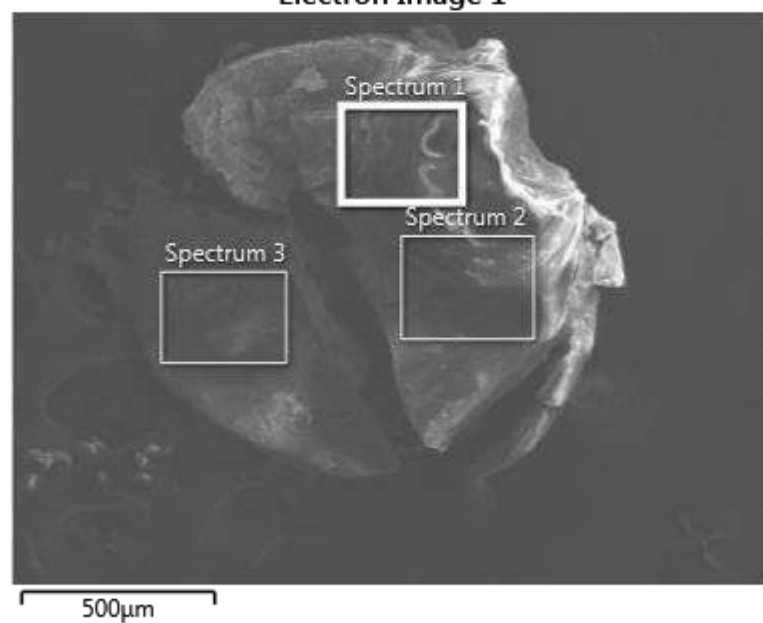

22/01/2020 10:26:44

Project 1

Rumania 1

Dorso 1 15 Kv

Electron Image 1

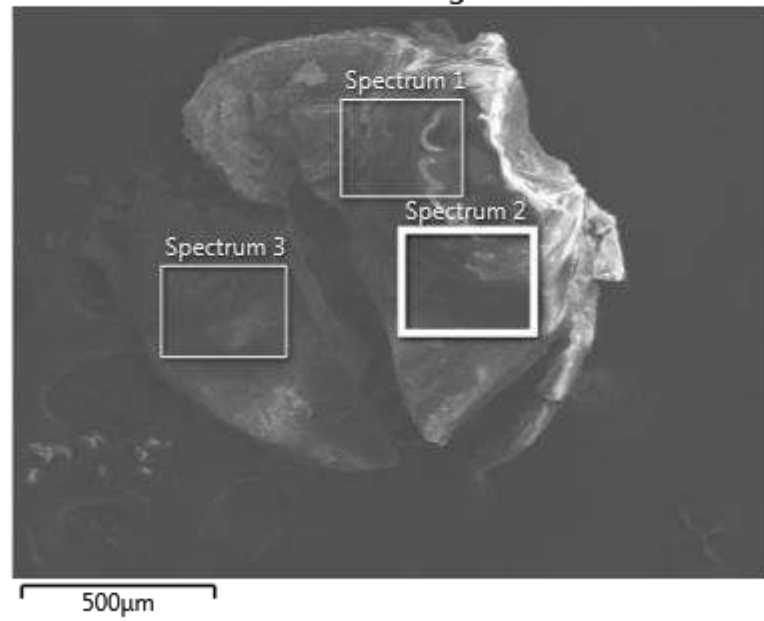

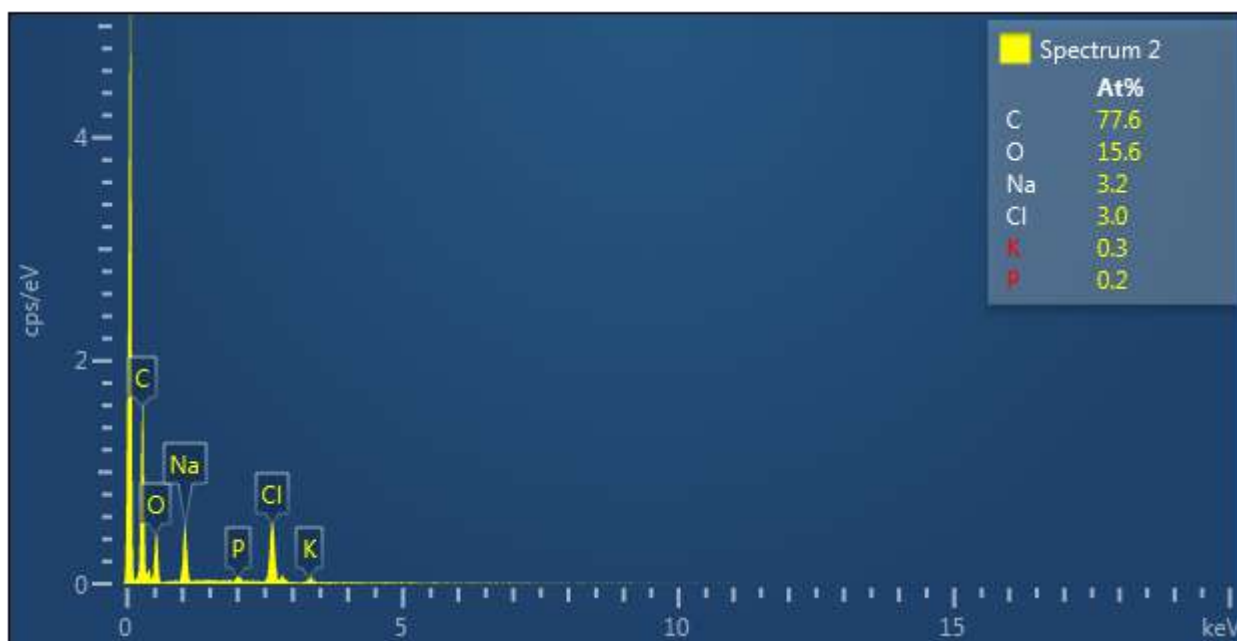

|                                 |                     |
|---------------------------------|---------------------|
| Label:                          | Spectrum 2          |
| Source:                         | Acquired            |
| Created:                        | 22/01/2020 10:26:44 |
| Livetime:                       | 60.1s               |
| Process Time:                   | 4                   |
| Accelerating Voltage:           | 15.00kV             |
| Magnification:                  | 57 x                |
| Working Distance:               | 10.0mm              |
| Specimen Tilt (degrees):        | 0.0                 |
| Elevation (degrees):            | 35.0                |
| Azimuth (degrees):              | 0.0                 |
| Number Of Channels:             | 2048                |
| Energy Range (keV):             | 20 keV              |
| Energy per Channel (eV):        | 10.0eV              |
| Detector Type Id:               | 29                  |
| Detector Type:                  | X-Max               |
| Window Type:                    | SATW                |
| Pulse Pile Up Correction:       | Succeeded           |
| Primary Detector:               | 2617                |
| Primary Detector Serial Number: | 77871-X080          |

| Element | Line Type | Apparent Concentration | k Ratio | Wt%   | Wt% Sigma | Atomic % | Standard Label | Factory Standard | Standard Calibration Date |
|---------|-----------|------------------------|---------|-------|-----------|----------|----------------|------------------|---------------------------|
| C       | K series  | 2.82                   | 0.02817 | 67.50 | 0.94      | 77.65    | C Vit          | Yes              |                           |
| O       | K series  | 1.35                   | 0.00453 | 18.05 | 0.73      | 15.59    | SiO2           | Yes              |                           |
| Na      | K         | 0.89                   | 0.0037  | 5.37  | 0.23      | 3.23     | Albite         | Yes              |                           |

|        |          |      |         |        |      |        |      |     |  |
|--------|----------|------|---------|--------|------|--------|------|-----|--|
|        | series   |      | 4       |        |      |        |      |     |  |
| P      | K series | 0.10 | 0.00056 | 0.53   | 0.09 | 0.23   | GaP  | Yes |  |
| Cl     | K series | 0.96 | 0.00840 | 7.74   | 0.29 | 3.02   | NaCl | Yes |  |
| K      | K series | 0.10 | 0.00086 | 0.80   | 0.12 | 0.28   | KBr  | Yes |  |
| Total: |          |      |         | 100.00 |      | 100.00 |      |     |  |

Electron Image 1

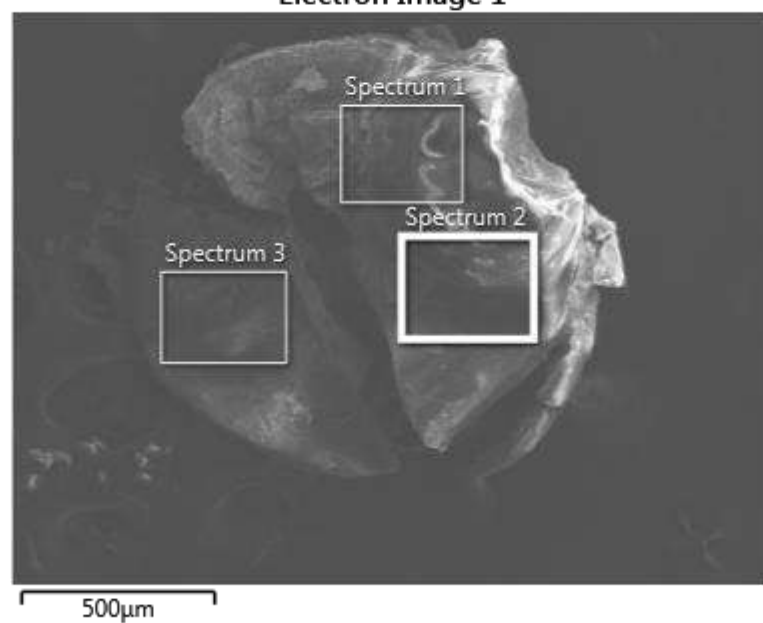

22/01/2020 10:27:53

Project 1

Rumania 1

Dorso 1 15 Kv

Electron Image 1

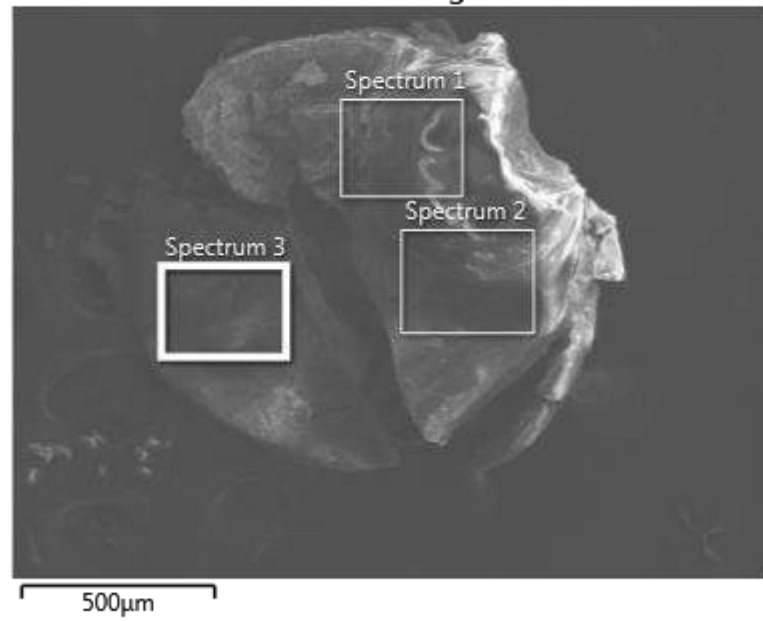

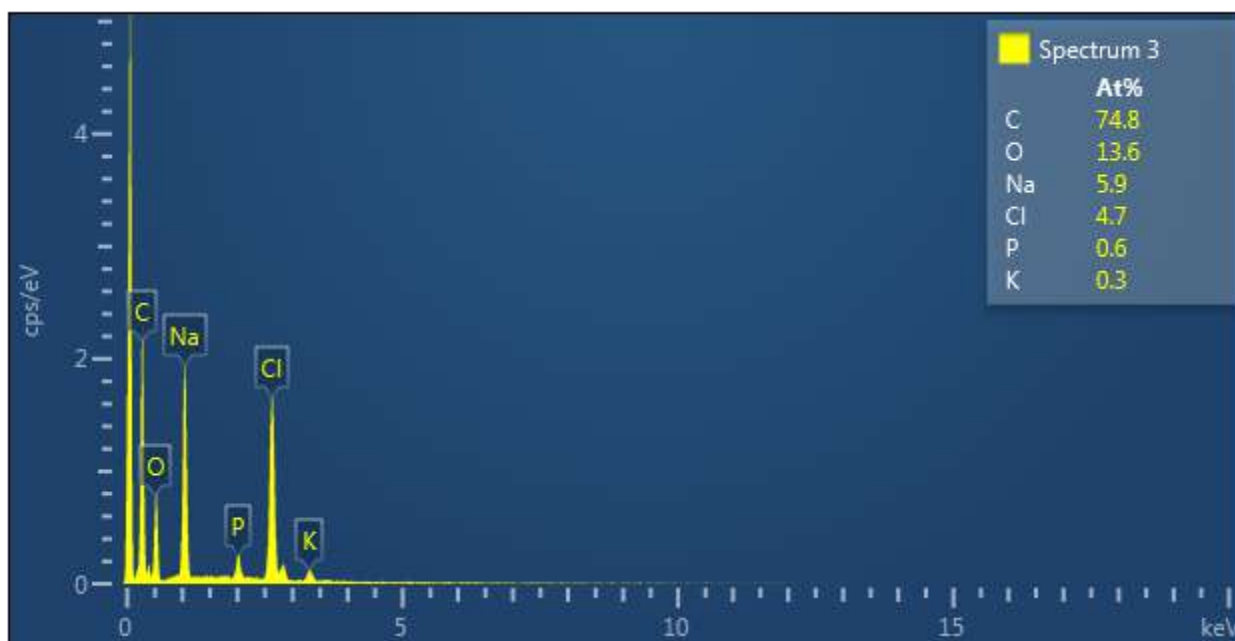

|                                 |                     |
|---------------------------------|---------------------|
| Label:                          | Spectrum 3          |
| Source:                         | Acquired            |
| Created:                        | 22/01/2020 10:27:53 |
| Livetime:                       | 60.0s               |
| Process Time:                   | 4                   |
| Accelerating Voltage:           | 15.00kV             |
| Magnification:                  | 57 x                |
| Working Distance:               | 10.0mm              |
| Specimen Tilt (degrees):        | 0.0                 |
| Elevation (degrees):            | 35.0                |
| Azimuth (degrees):              | 0.0                 |
| Number Of Channels:             | 2048                |
| Energy Range (keV):             | 20 keV              |
| Energy per Channel (eV):        | 10.0eV              |
| Detector Type Id:               | 29                  |
| Detector Type:                  | X-Max               |
| Window Type:                    | SATW                |
| Pulse Pile Up Correction:       | Succeeded           |
| Primary Detector:               | 2617                |
| Primary Detector Serial Number: | 77871-X080          |

| Element | Line Type | Apparent Concentration | k Ratio | Wt%   | Wt% Sigma | Atomic % | Standard Label | Factory Standard | Standard Calibration Date |
|---------|-----------|------------------------|---------|-------|-----------|----------|----------------|------------------|---------------------------|
| C       | K series  | 3.80                   | 0.03800 | 61.92 | 0.78      | 74.82    | C Vit          | Yes              |                           |
| O       | K series  | 2.32                   | 0.00781 | 14.99 | 0.48      | 13.60    | SiO2           | Yes              |                           |
| Na      | K         | 3.32                   | 0.0140  | 9.41  | 0.24      | 5.94     | Albite         | Yes              |                           |



|        |          |      |         |        |      |        |      |     |  |
|--------|----------|------|---------|--------|------|--------|------|-----|--|
|        | series   |      | 2       |        |      |        |      |     |  |
| P      | K series | 0.47 | 0.00261 | 1.19   | 0.08 | 0.56   | GaP  | Yes |  |
| Cl     | K series | 2.95 | 0.02578 | 11.54  | 0.28 | 4.73   | NaCl | Yes |  |
| K      | K series | 0.24 | 0.00204 | 0.93   | 0.08 | 0.35   | KBr  | Yes |  |
| Total: |          |      |         | 100.00 |      | 100.00 |      |     |  |

Electron Image 1

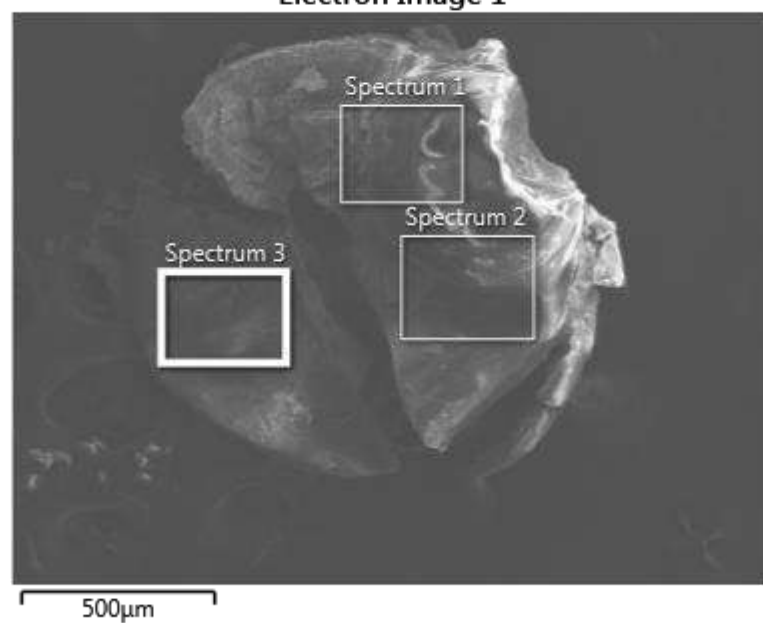

22/01/2020 10:38:53

Project 1

Rumania 2

Trozos 15 Kv

Electron Image 2

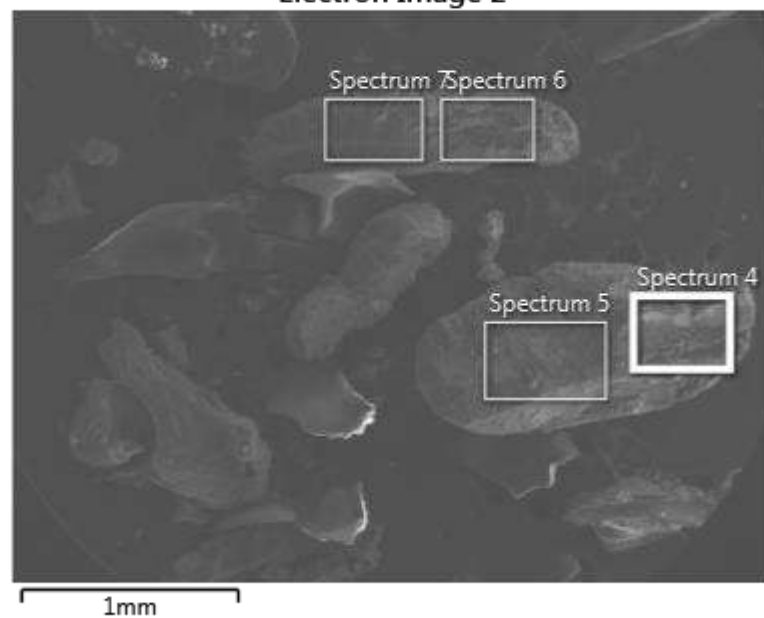

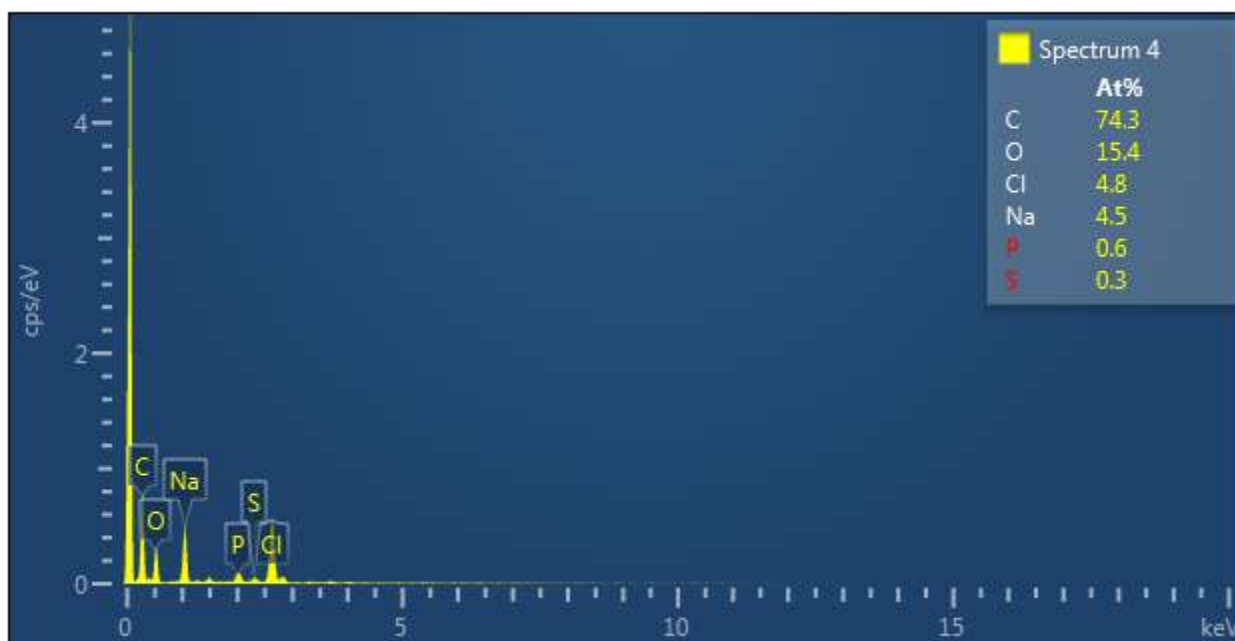

|                                 |                     |
|---------------------------------|---------------------|
| Label:                          | Spectrum 4          |
| Source:                         | Acquired            |
| Created:                        | 22/01/2020 10:38:53 |
| Livetime:                       | 60.5s               |
| Process Time:                   | 4                   |
| Accelerating Voltage:           | 15.00kV             |
| Magnification:                  | 32 x                |
| Working Distance:               | 10.0mm              |
| Specimen Tilt (degrees):        | 0.0                 |
| Elevation (degrees):            | 35.0                |
| Azimuth (degrees):              | 0.0                 |
| Number Of Channels:             | 2048                |
| Energy Range (keV):             | 20 keV              |
| Energy per Channel (eV):        | 10.0eV              |
| Detector Type Id:               | 29                  |
| Detector Type:                  | X-Max               |
| Window Type:                    | SATW                |
| Pulse Pile Up Correction:       | Succeeded           |
| Primary Detector:               | 2617                |
| Primary Detector Serial Number: | 77871-X080          |

| Element | Line Type | Apparent Concentration | k Ratio | Wt%   | Wt% Sigma | Atomic % | Standard Label | Factory Standard | Standard Calibration Date |
|---------|-----------|------------------------|---------|-------|-----------|----------|----------------|------------------|---------------------------|
| C       | K series  | 1.22                   | 0.01218 | 61.84 | 1.10      | 74.30    | C Vit          | Yes              |                           |
| O       | K series  | 0.89                   | 0.00299 | 17.10 | 0.83      | 15.43    | SiO2           | Yes              |                           |
| Na      | K         | 0.83                   | 0.0035  | 7.24  | 0.31      | 4.55     | Albite         | Yes              |                           |

|        |          |      |         |        |      |        |      |     |  |
|--------|----------|------|---------|--------|------|--------|------|-----|--|
|        | series   |      | 1       |        |      |        |      |     |  |
| P      | K series | 0.17 | 0.00096 | 1.31   | 0.14 | 0.61   | GaP  | Yes |  |
| S      | K series | 0.05 | 0.00045 | 0.59   | 0.12 | 0.26   | FeS2 | Yes |  |
| Cl     | K series | 1.01 | 0.00880 | 11.91  | 0.43 | 4.85   | NaCl | Yes |  |
| Total: |          |      |         | 100.00 |      | 100.00 |      |     |  |

Electron Image 2

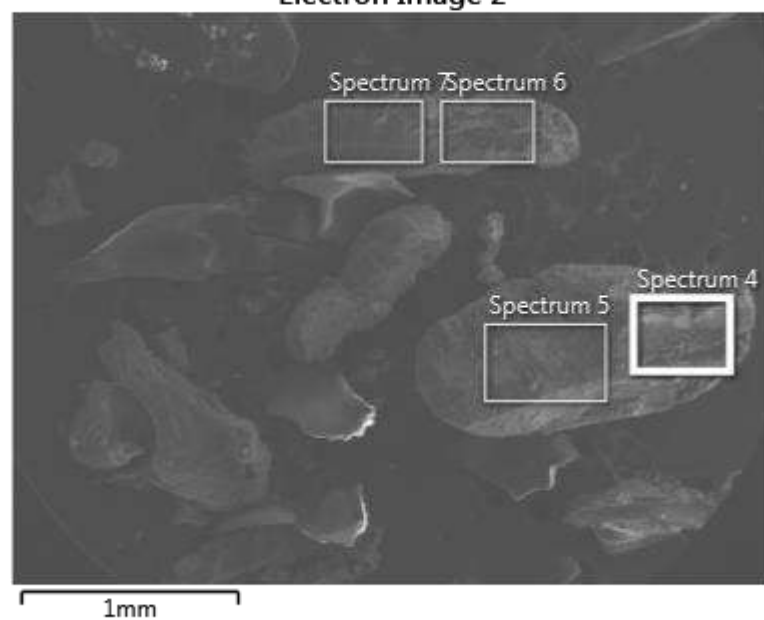

22/01/2020 10:40:05

Project 1

Rumania 2

Trozos 15 Kv

Electron Image 2

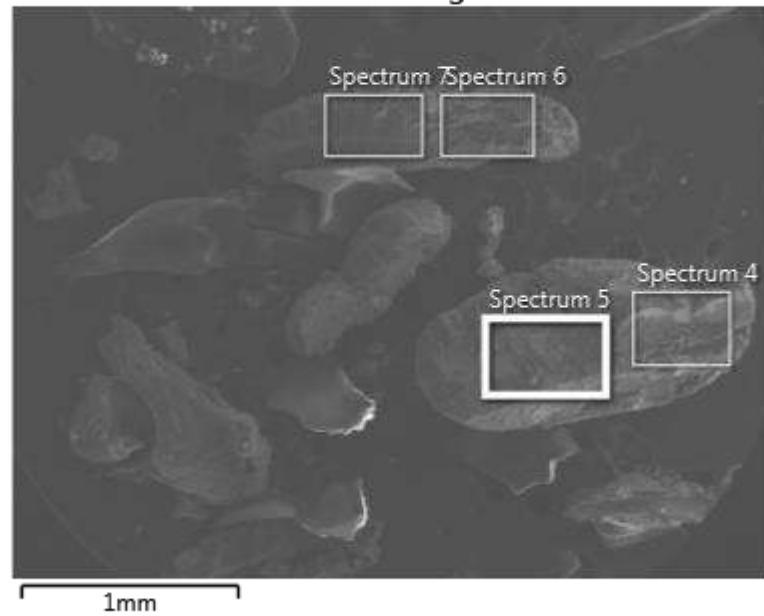

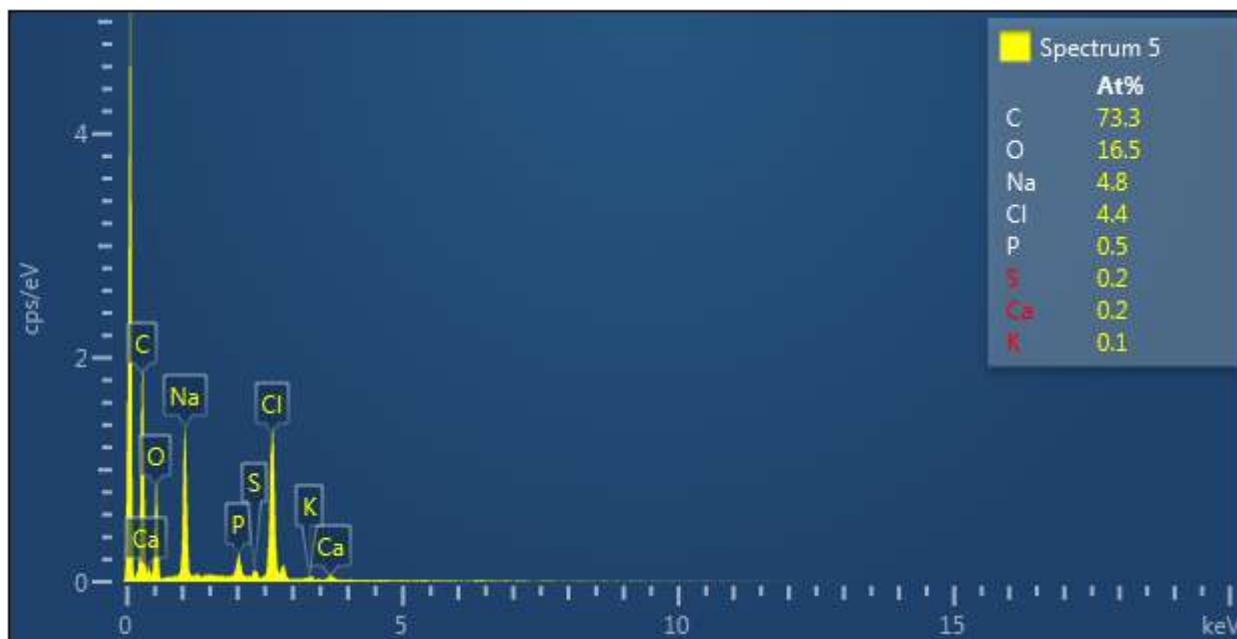

|                                 |                     |
|---------------------------------|---------------------|
| Label:                          | Spectrum 5          |
| Source:                         | Acquired            |
| Created:                        | 22/01/2020 10:40:05 |
| Livetime:                       | 60.2s               |
| Process Time:                   | 4                   |
| Accelerating Voltage:           | 15.00kV             |
| Magnification:                  | 32 x                |
| Working Distance:               | 10.0mm              |
| Specimen Tilt (degrees):        | 0.0                 |
| Elevation (degrees):            | 35.0                |
| Azimuth (degrees):              | 0.0                 |
| Number Of Channels:             | 2048                |
| Energy Range (keV):             | 20 keV              |
| Energy per Channel (eV):        | 10.0eV              |
| Detector Type Id:               | 29                  |
| Detector Type:                  | X-Max               |
| Window Type:                    | SATW                |
| Pulse Pile Up Correction:       | Succeeded           |
| Primary Detector:               | 2617                |
| Primary Detector Serial Number: | 77871-X080          |

| Element | Line Type | Apparent Concentration | k Ratio | Wt%   | Wt% Sigma | Atomic % | Standard Label | Factory Standard | Standard Calibration Date |
|---------|-----------|------------------------|---------|-------|-----------|----------|----------------|------------------|---------------------------|
| C       | K series  | 3.43                   | 0.03432 | 60.91 | 0.86      | 73.26    | C Vit          | Yes              |                           |
| O       | K series  | 2.57                   | 0.00864 | 18.31 | 0.56      | 16.53    | SiO2           | Yes              |                           |
| Na      | K         | 2.32                   | 0.0097  | 7.62  | 0.22      | 4.79     | Albite         | Yes              |                           |

|        |          |      |         |        |      |        |                  |     |  |
|--------|----------|------|---------|--------|------|--------|------------------|-----|--|
|        | series   |      | 8       |        |      |        |                  |     |  |
| P      | K series | 0.41 | 0.00229 | 1.18   | 0.08 | 0.55   | GaP              | Yes |  |
| S      | K series | 0.11 | 0.00097 | 0.47   | 0.06 | 0.21   | FeS <sub>2</sub> | Yes |  |
| Cl     | K series | 2.42 | 0.02112 | 10.73  | 0.28 | 4.37   | NaCl             | Yes |  |
| K      | K series | 0.06 | 0.00050 | 0.26   | 0.07 | 0.10   | KBr              | Yes |  |
| Ca     | K series | 0.12 | 0.00103 | 0.52   | 0.08 | 0.19   | Wollastonite     | Yes |  |
| Total: |          |      |         | 100.00 |      | 100.00 |                  |     |  |

Electron Image 2

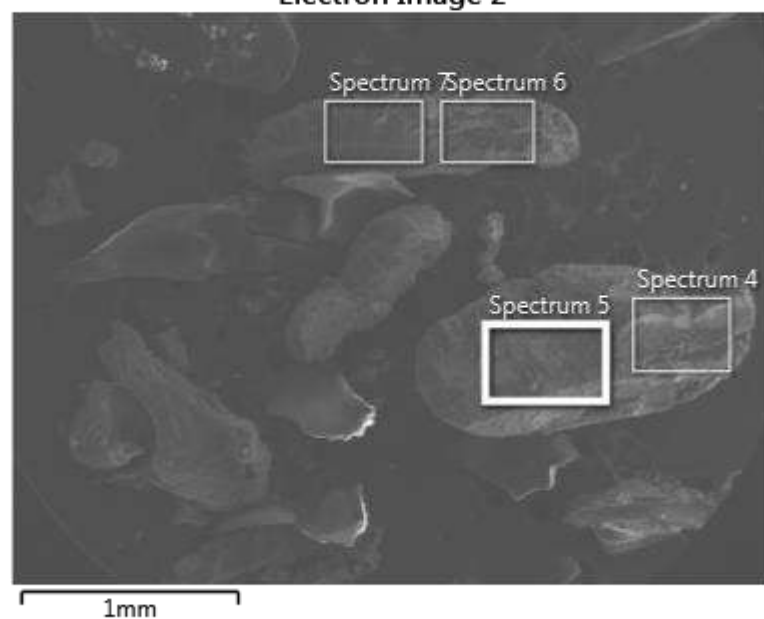

22/01/2020 10:41:15

Project 1

Rumania 2

Trozos 15 Kv

Electron Image 2

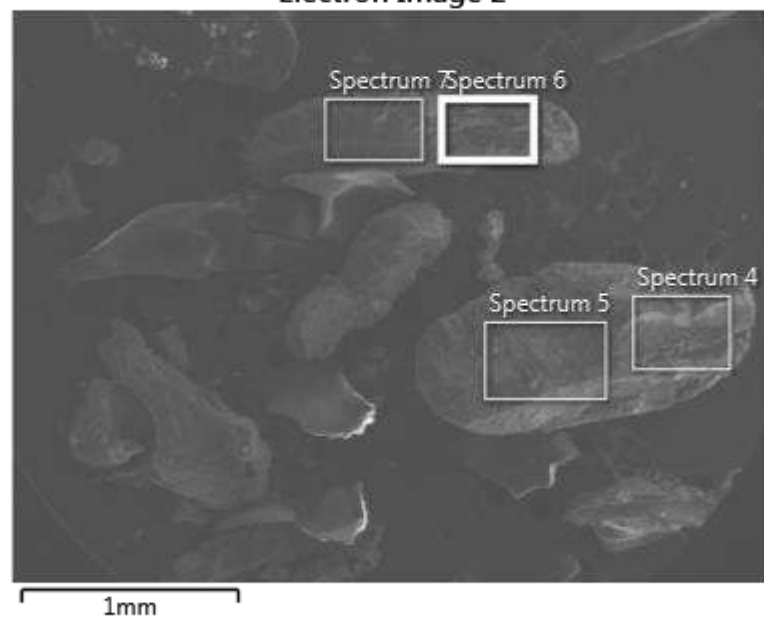



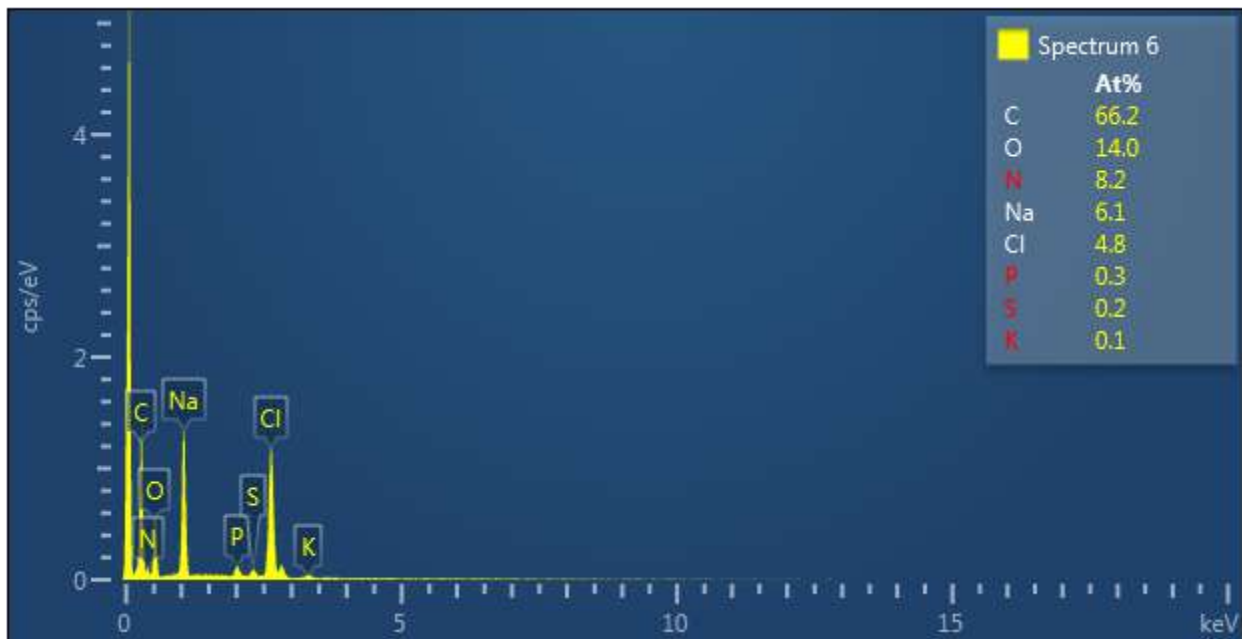

|                                 |                     |
|---------------------------------|---------------------|
| Label:                          | Spectrum 6          |
| Source:                         | Acquired            |
| Created:                        | 22/01/2020 10:41:15 |
| Livetime:                       | 60.0s               |
| Process Time:                   | 4                   |
| Accelerating Voltage:           | 15.00kV             |
| Magnification:                  | 32 x                |
| Working Distance:               | 10.0mm              |
| Specimen Tilt (degrees):        | 0.0                 |
| Elevation (degrees):            | 35.0                |
| Azimuth (degrees):              | 0.0                 |
| Number Of Channels:             | 2048                |
| Energy Range (keV):             | 20 keV              |
| Energy per Channel (eV):        | 10.0eV              |
| Detector Type Id:               | 29                  |
| Detector Type:                  | X-Max               |
| Window Type:                    | SATW                |
| Pulse Pile Up Correction:       | Succeeded           |
| Primary Detector:               | 2617                |
| Primary Detector Serial Number: | 77871-X080          |

| Element | Line Type | Apparent Concentration | k Ratio | Wt%   | Wt% Sigma | Atomic % | Standard Label | Factory Standard | Standard Calibration Date |
|---------|-----------|------------------------|---------|-------|-----------|----------|----------------|------------------|---------------------------|
| C       | K series  | 2.26                   | 0.02258 | 54.15 | 1.40      | 66.15    | C Vit          | Yes              |                           |
| N       | K series  | 0.87                   | 0.00154 | 7.84  | 1.49      | 8.21     | BN             | Yes              |                           |
| O       | K         | 1.60                   | 0.0053  | 15.30 | 0.64      | 14.03    | SiO2           | Yes              |                           |

|        |          |      |         |        |      |        |                  |     |  |
|--------|----------|------|---------|--------|------|--------|------------------|-----|--|
|        | series   |      | 7       |        |      |        |                  |     |  |
| Na     | K series | 2.32 | 0.00978 | 9.60   | 0.33 | 6.13   | Albite           | Yes |  |
| P      | K series | 0.19 | 0.00107 | 0.71   | 0.08 | 0.33   | GaP              | Yes |  |
| S      | K series | 0.09 | 0.00077 | 0.48   | 0.08 | 0.22   | FeS <sub>2</sub> | Yes |  |
| Cl     | K series | 2.06 | 0.01799 | 11.60  | 0.39 | 4.80   | NaCl             | Yes |  |
| K      | K series | 0.06 | 0.00049 | 0.32   | 0.08 | 0.12   | KBr              | Yes |  |
| Total: |          |      |         | 100.00 |      | 100.00 |                  |     |  |

Electron Image 2

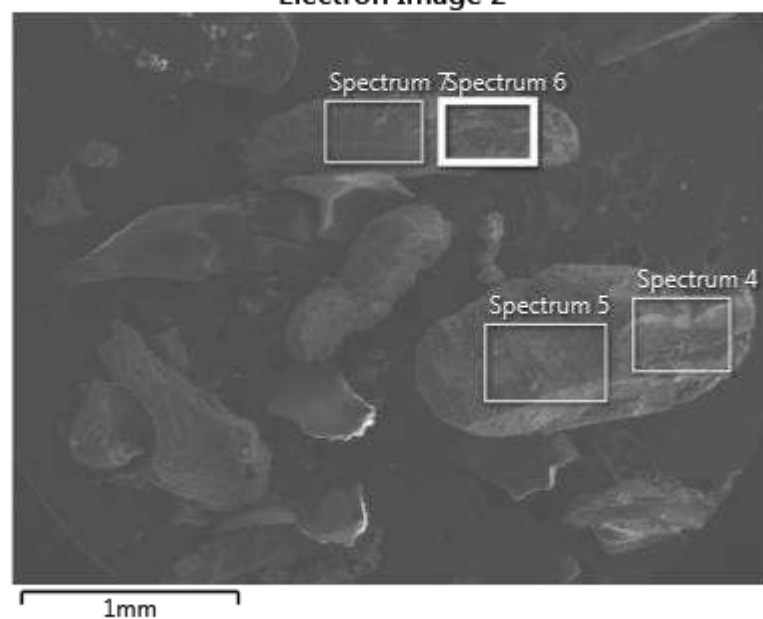

22/01/2020 10:42:27

Project 1

Rumania 2

Trozos 15 Kv

Electron Image 2

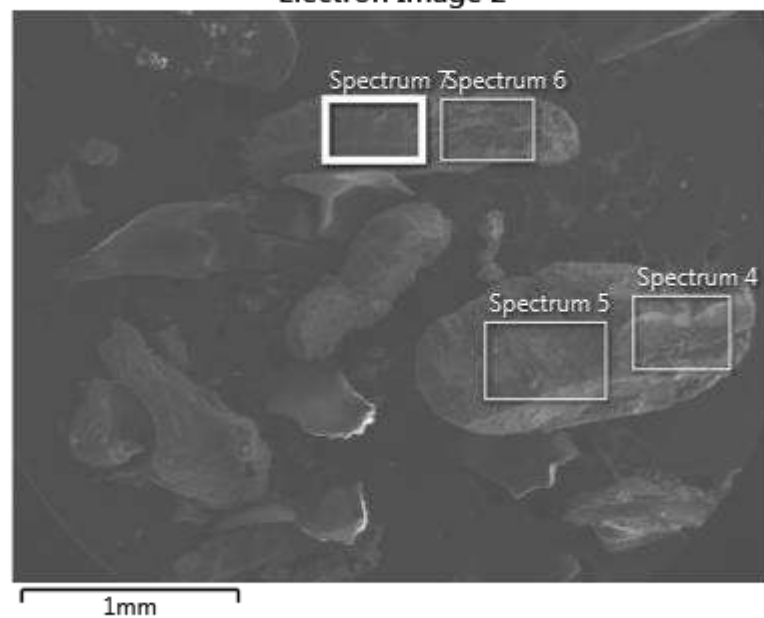

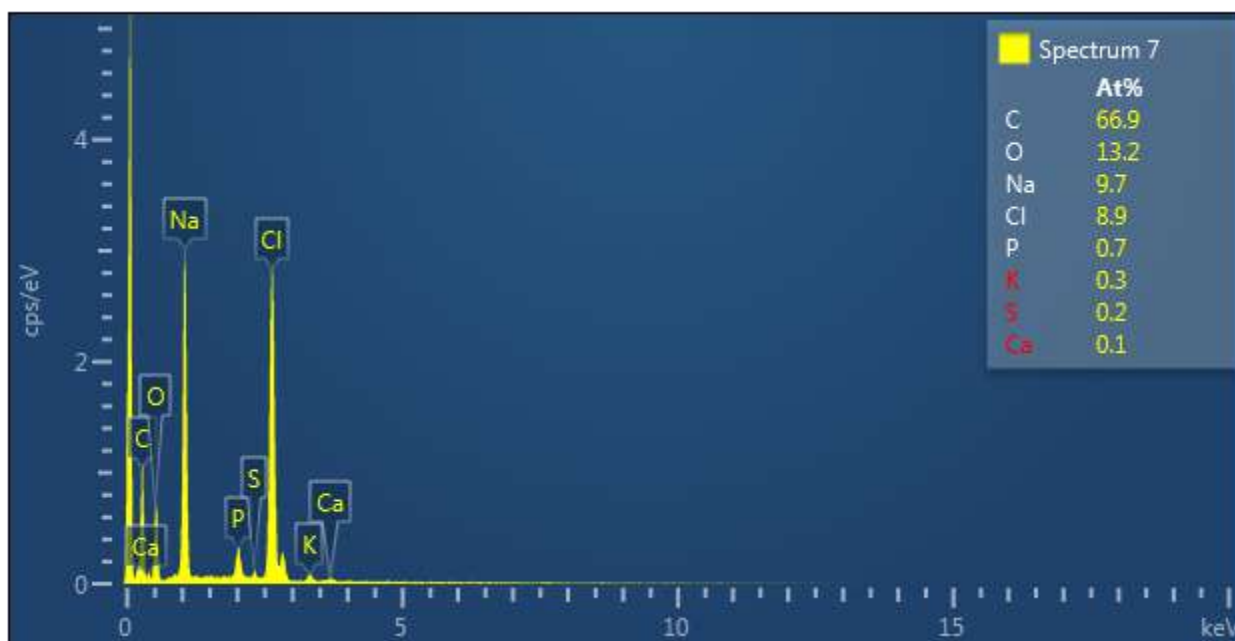

|                                 |                     |
|---------------------------------|---------------------|
| Label:                          | Spectrum 7          |
| Source:                         | Acquired            |
| Created:                        | 22/01/2020 10:42:27 |
| Livetime:                       | 60.3s               |
| Process Time:                   | 4                   |
| Accelerating Voltage:           | 15.00kV             |
| Magnification:                  | 32 x                |
| Working Distance:               | 10.0mm              |
| Specimen Tilt (degrees):        | 0.0                 |
| Elevation (degrees):            | 35.0                |
| Azimuth (degrees):              | 0.0                 |
| Number Of Channels:             | 2048                |
| Energy Range (keV):             | 20 keV              |
| Energy per Channel (eV):        | 10.0eV              |
| Detector Type Id:               | 29                  |
| Detector Type:                  | X-Max               |
| Window Type:                    | SATW                |
| Pulse Pile Up Correction:       | Succeeded           |
| Primary Detector:               | 2617                |
| Primary Detector Serial Number: | 77871-X080          |

| Element | Line Type | Apparent Concentration | k Ratio | Wt%   | Wt% Sigma | Atomic % | Standard Label | Factory Standard | Standard Calibration Date |
|---------|-----------|------------------------|---------|-------|-----------|----------|----------------|------------------|---------------------------|
| C       | K series  | 1.93                   | 0.01935 | 50.29 | 1.15      | 66.87    | C Vit          | Yes              |                           |
| O       | K series  | 2.11                   | 0.00709 | 13.25 | 0.48      | 13.23    | SiO2           | Yes              |                           |
| Na      | K         | 5.10                   | 0.0215  | 14.00 | 0.36      | 9.72     | Albite         | Yes              |                           |

|        |          |      |         |        |      |        |                  |     |  |
|--------|----------|------|---------|--------|------|--------|------------------|-----|--|
|        | series   |      | 1       |        |      |        |                  |     |  |
| P      | K series | 0.55 | 0.00308 | 1.41   | 0.09 | 0.72   | GaP              | Yes |  |
| S      | K series | 0.10 | 0.00084 | 0.36   | 0.06 | 0.18   | FeS <sub>2</sub> | Yes |  |
| Cl     | K series | 5.06 | 0.04423 | 19.76  | 0.49 | 8.90   | NaCl             | Yes |  |
| K      | K series | 0.16 | 0.00139 | 0.65   | 0.08 | 0.26   | KBr              | Yes |  |
| Ca     | K series | 0.07 | 0.00064 | 0.29   | 0.07 | 0.12   | Wollastonite     | Yes |  |
| Total: |          |      |         | 100.00 |      | 100.00 |                  |     |  |

Electron Image 2

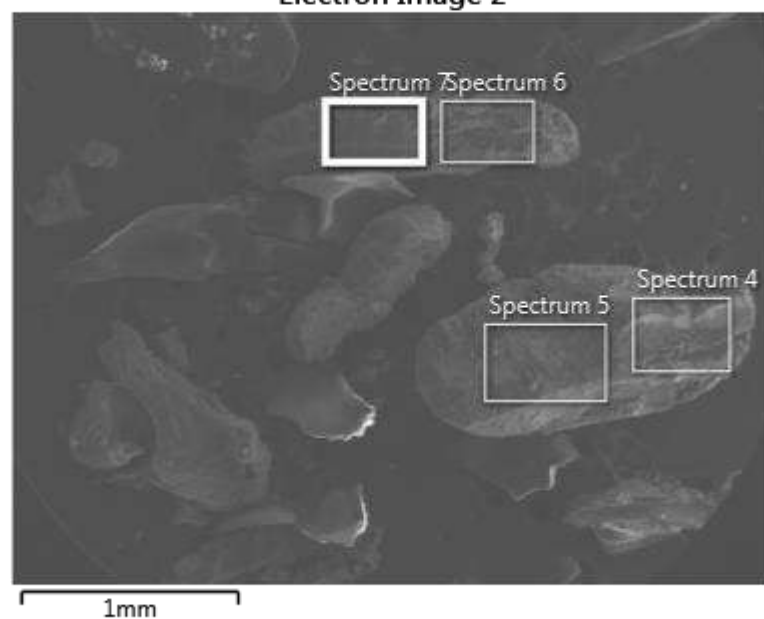

22/01/2020 10:47:06

Project 1

Rumania 3

Trozos 15 Kv

Electron Image 3

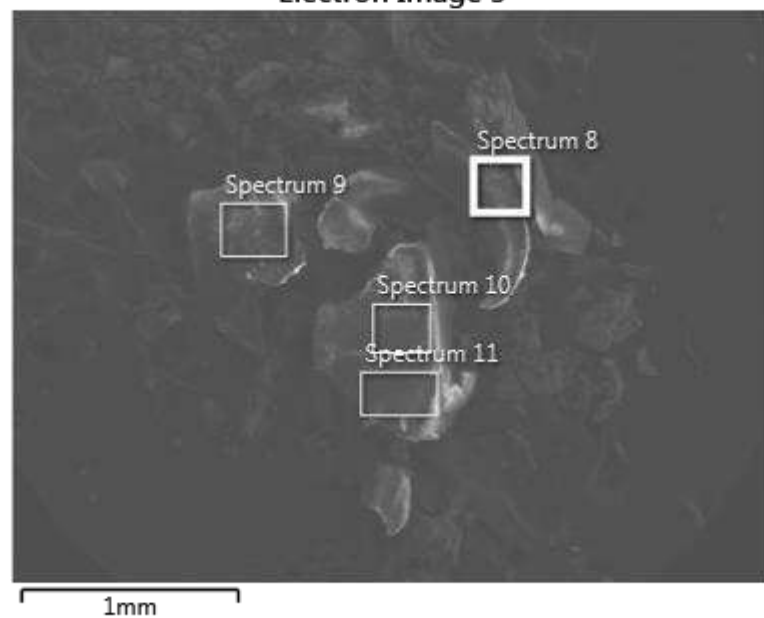

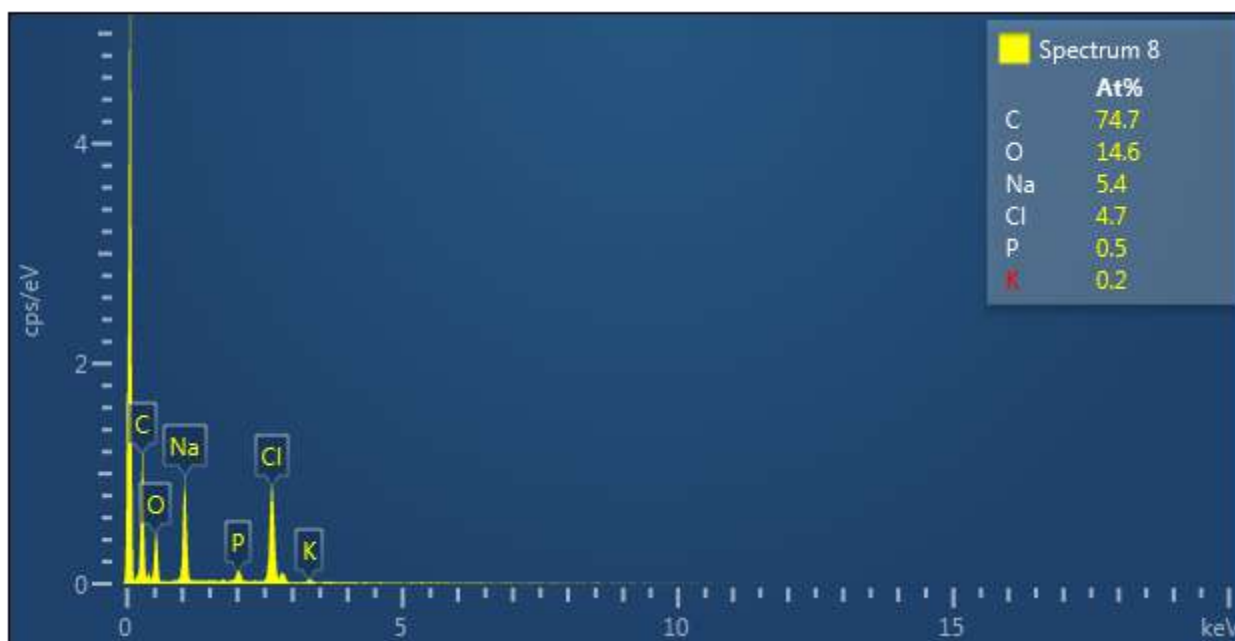

|                                 |                     |
|---------------------------------|---------------------|
| Label:                          | Spectrum 8          |
| Source:                         | Acquired            |
| Created:                        | 22/01/2020 10:47:06 |
| Livetime:                       | 60.3s               |
| Process Time:                   | 4                   |
| Accelerating Voltage:           | 15.00kV             |
| Magnification:                  | 32 x                |
| Working Distance:               | 10.0mm              |
| Specimen Tilt (degrees):        | 0.0                 |
| Elevation (degrees):            | 35.0                |
| Azimuth (degrees):              | 0.0                 |
| Number Of Channels:             | 2048                |
| Energy Range (keV):             | 20 keV              |
| Energy per Channel (eV):        | 10.0eV              |
| Detector Type Id:               | 29                  |
| Detector Type:                  | X-Max               |
| Window Type:                    | SATW                |
| Pulse Pile Up Correction:       | Succeeded           |
| Primary Detector:               | 2617                |
| Primary Detector Serial Number: | 77871-X080          |

| Element | Line Type | Apparent Concentration | k Ratio | Wt%   | Wt% Sigma | Atomic % | Standard Label | Factory Standard | Standard Calibration Date |
|---------|-----------|------------------------|---------|-------|-----------|----------|----------------|------------------|---------------------------|
| C       | K series  | 2.03                   | 0.02026 | 62.18 | 1.08      | 74.70    | C Vit          | Yes              |                           |
| O       | K series  | 1.32                   | 0.00444 | 16.15 | 0.70      | 14.56    | SiO2           | Yes              |                           |
| Na      | K         | 1.56                   | 0.0065  | 8.52  | 0.31      | 5.35     | Albite         | Yes              |                           |

|        |          |      |         |        |      |        |      |     |  |
|--------|----------|------|---------|--------|------|--------|------|-----|--|
|        | series   |      | 8       |        |      |        |      |     |  |
| P      | K series | 0.21 | 0.00119 | 1.03   | 0.10 | 0.48   | GaP  | Yes |  |
| Cl     | K series | 1.55 | 0.01354 | 11.57  | 0.39 | 4.71   | NaCl | Yes |  |
| K      | K series | 0.07 | 0.00062 | 0.54   | 0.10 | 0.20   | KBr  | Yes |  |
| Total: |          |      |         | 100.00 |      | 100.00 |      |     |  |

Electron Image 3

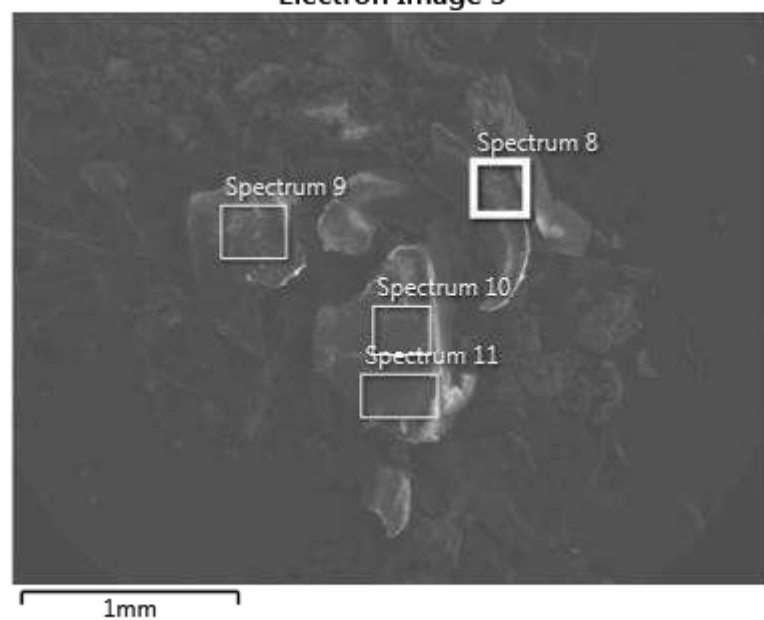



22/01/2020 10:48:16

Project 1

Rumania 3

Trozos 15 Kv

Electron Image 3

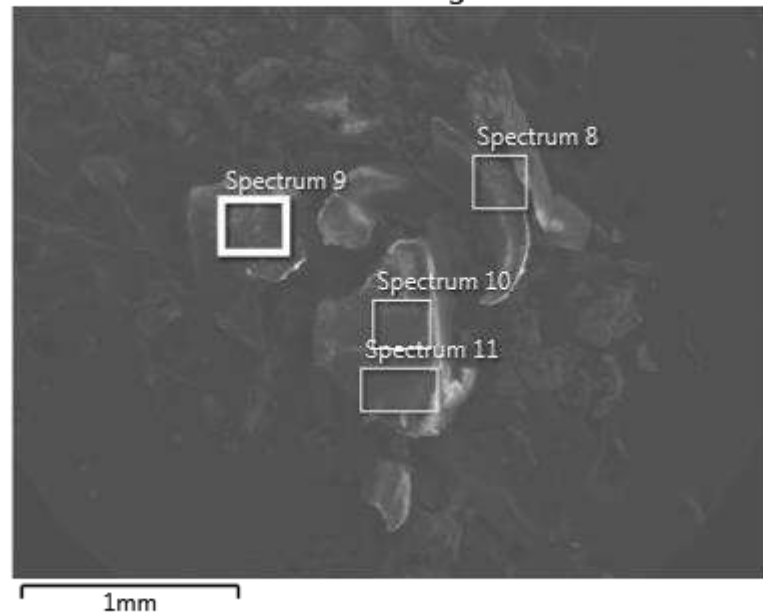

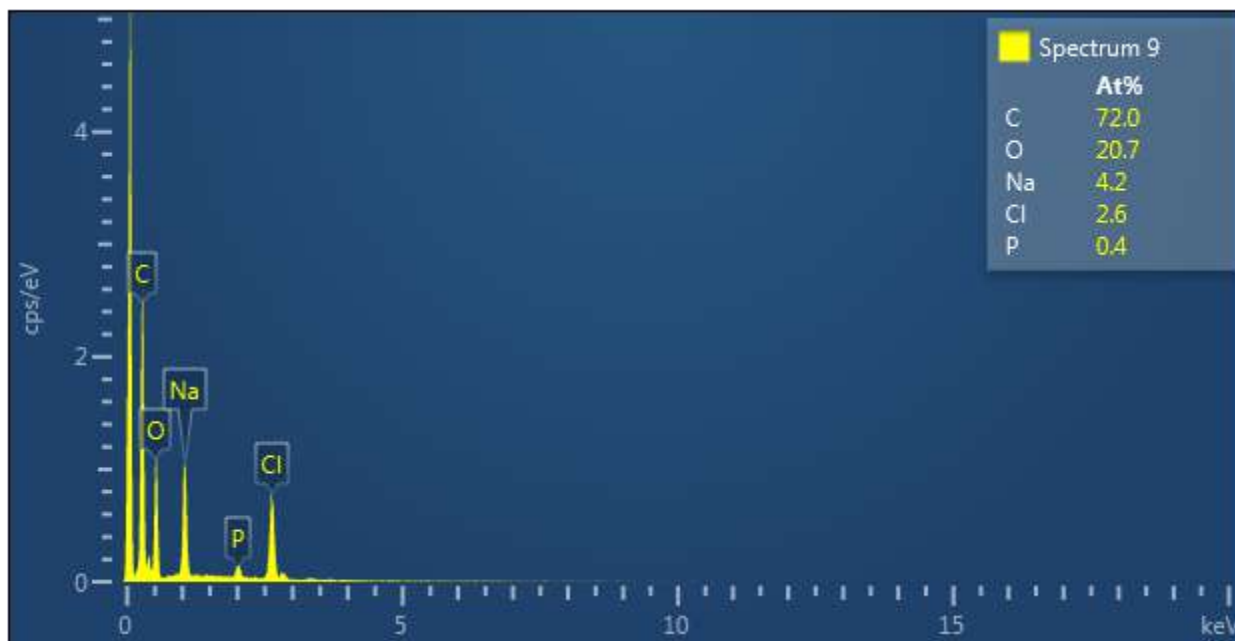

|                                 |                     |
|---------------------------------|---------------------|
| Label:                          | Spectrum 9          |
| Source:                         | Acquired            |
| Created:                        | 22/01/2020 10:48:16 |
| Livetime:                       | 60.3s               |
| Process Time:                   | 4                   |
| Accelerating Voltage:           | 15.00kV             |
| Magnification:                  | 32 x                |
| Working Distance:               | 10.0mm              |
| Specimen Tilt (degrees):        | 0.0                 |
| Elevation (degrees):            | 35.0                |
| Azimuth (degrees):              | 0.0                 |
| Number Of Channels:             | 2048                |
| Energy Range (keV):             | 20 keV              |
| Energy per Channel (eV):        | 10.0eV              |
| Detector Type Id:               | 29                  |
| Detector Type:                  | X-Max               |
| Window Type:                    | SATW                |
| Pulse Pile Up Correction:       | Succeeded           |
| Primary Detector:               | 2617                |
| Primary Detector Serial Number: | 77871-X080          |

| Element | Line Type | Apparent Concentration | k Ratio | Wt%   | Wt% Sigma | Atomic % | Standard Label | Factory Standard | Standard Calibration Date |
|---------|-----------|------------------------|---------|-------|-----------|----------|----------------|------------------|---------------------------|
| C       | K series  | 4.15                   | 0.04153 | 61.83 | 0.61      | 72.03    | C Vit          | Yes              |                           |
| O       | K series  | 3.14                   | 0.01055 | 23.72 | 0.55      | 20.74    | SiO2           | Yes              |                           |
| Na      | K         | 1.79                   | 0.0075  | 6.91  | 0.19      | 4.21     | Albite         | Yes              |                           |

|        |          |      |         |        |      |        |      |     |  |
|--------|----------|------|---------|--------|------|--------|------|-----|--|
|        | series   |      | 5       |        |      |        |      |     |  |
| P      | K series | 0.25 | 0.00140 | 0.83   | 0.08 | 0.37   | GaP  | Yes |  |
| Cl     | K series | 1.32 | 0.01157 | 6.71   | 0.18 | 2.65   | NaCl | Yes |  |
| Total: |          |      |         | 100.00 |      | 100.00 |      |     |  |

Electron Image 3

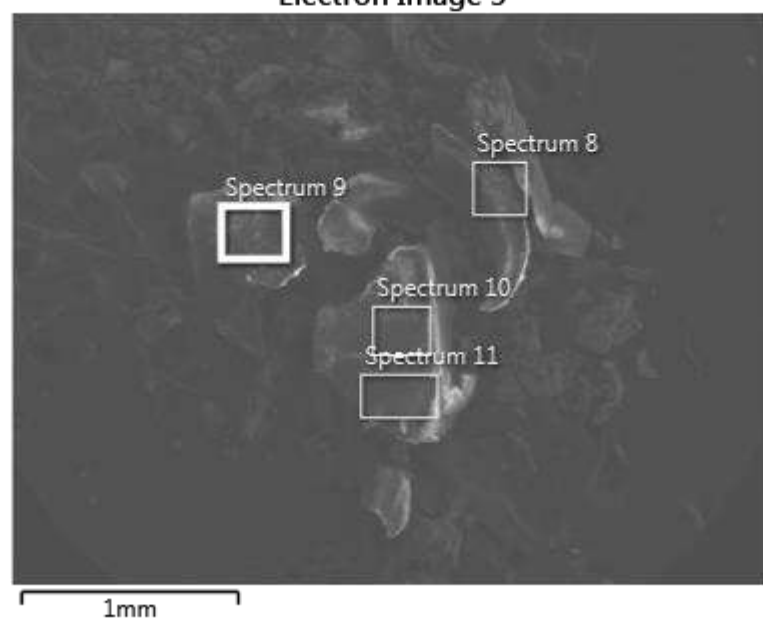

22/01/2020 10:49:27

Project 1

Rumania 3

Trozos 15 Kv

Electron Image 3

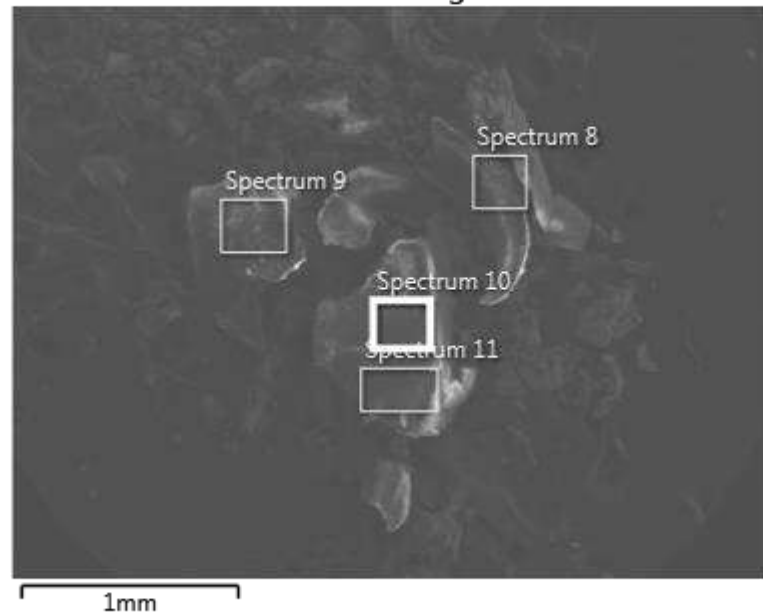

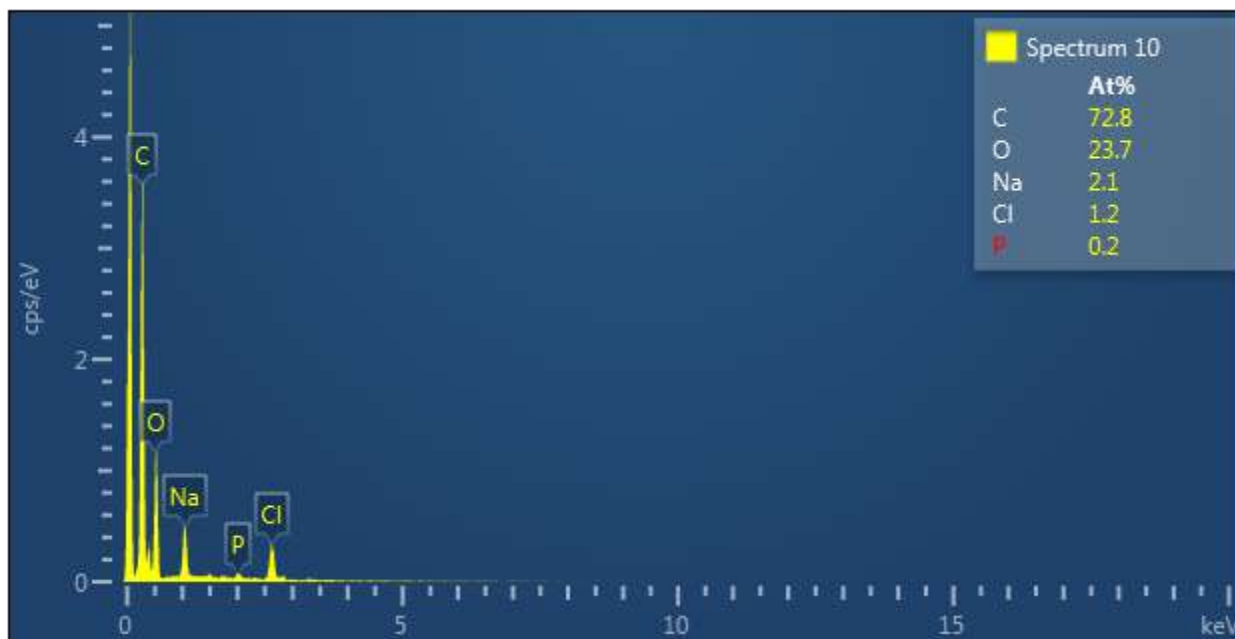

|                                 |                     |
|---------------------------------|---------------------|
| Label:                          | Spectrum 10         |
| Source:                         | Acquired            |
| Created:                        | 22/01/2020 10:49:27 |
| Livetime:                       | 60.1s               |
| Process Time:                   | 4                   |
| Accelerating Voltage:           | 15.00kV             |
| Magnification:                  | 32 x                |
| Working Distance:               | 10.0mm              |
| Specimen Tilt (degrees):        | 0.0                 |
| Elevation (degrees):            | 35.0                |
| Azimuth (degrees):              | 0.0                 |
| Number Of Channels:             | 2048                |
| Energy Range (keV):             | 20 keV              |
| Energy per Channel (eV):        | 10.0eV              |
| Detector Type Id:               | 29                  |
| Detector Type:                  | X-Max               |
| Window Type:                    | SATW                |
| Pulse Pile Up Correction:       | Succeeded           |
| Primary Detector:               | 2617                |
| Primary Detector Serial Number: | 77871-X080          |

| Element | Line Type | Apparent Concentration | k Ratio | Wt%   | Wt% Sigma | Atomic % | Standard Label | Factory Standard | Standard Calibration Date |
|---------|-----------|------------------------|---------|-------|-----------|----------|----------------|------------------|---------------------------|
| C       | K series  | 5.67                   | 0.05671 | 64.78 | 0.60      | 72.82    | C Vit          | Yes              |                           |
| O       | K series  | 3.39                   | 0.01139 | 28.08 | 0.59      | 23.69    | SiO2           | Yes              |                           |
| Na      | K         | 0.80                   | 0.0033  | 3.59  | 0.15      | 2.11     | Albite         | Yes              |                           |

|        |          |      |         |        |      |        |      |     |  |
|--------|----------|------|---------|--------|------|--------|------|-----|--|
|        | series   |      | 6       |        |      |        |      |     |  |
| P      | K series | 0.10 | 0.00056 | 0.37   | 0.07 | 0.16   | GaP  | Yes |  |
| Cl     | K series | 0.56 | 0.00490 | 3.18   | 0.13 | 1.21   | NaCl | Yes |  |
| Total: |          |      |         | 100.00 |      | 100.00 |      |     |  |

Electron Image 3

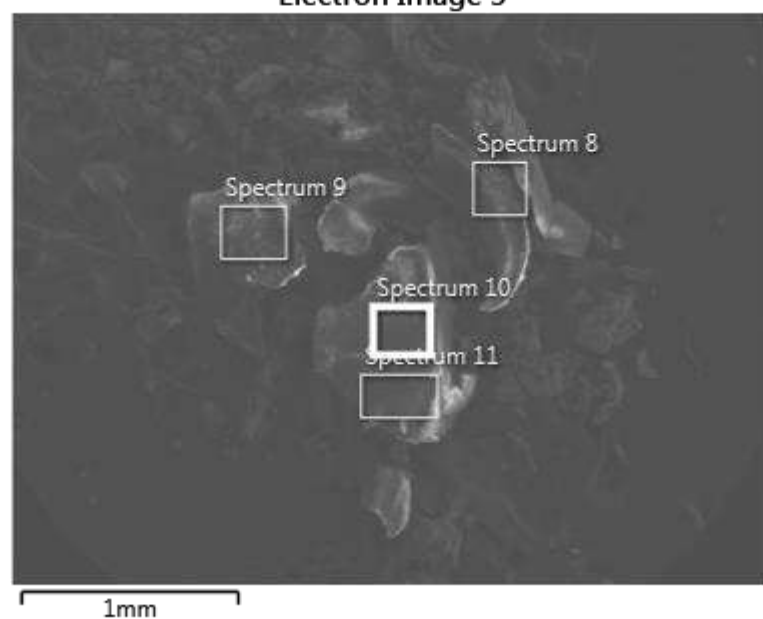

22/01/2020 10:50:37

Project 1

Rumania 3

Trozos 15 Kv

Electron Image 3

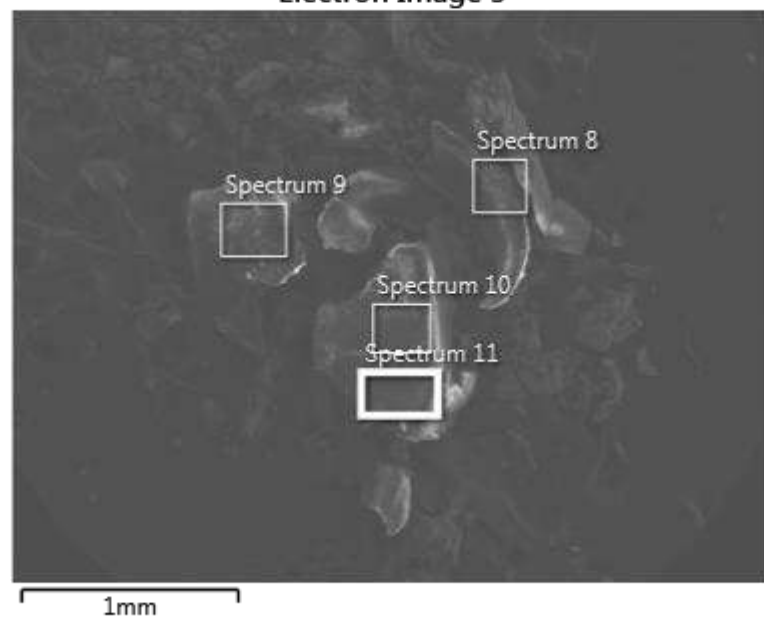

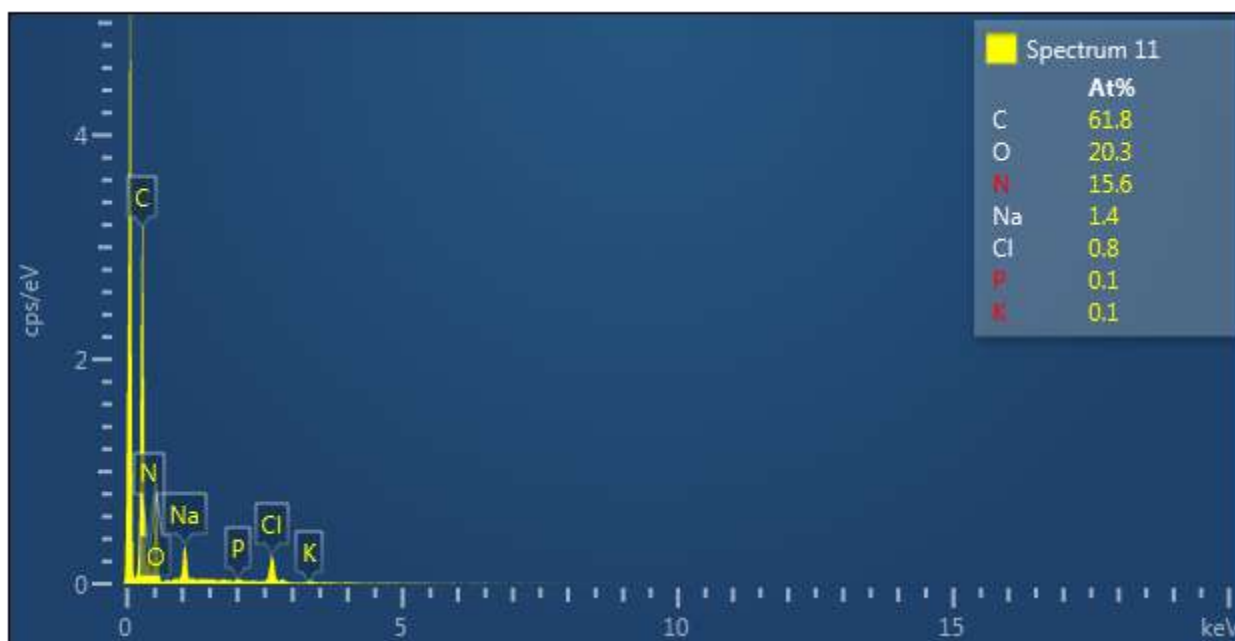

|                                 |                     |
|---------------------------------|---------------------|
| Label:                          | Spectrum 11         |
| Source:                         | Acquired            |
| Created:                        | 22/01/2020 10:50:37 |
| Livetime:                       | 60.1s               |
| Process Time:                   | 4                   |
| Accelerating Voltage:           | 15.00kV             |
| Magnification:                  | 32 x                |
| Working Distance:               | 10.0mm              |
| Specimen Tilt (degrees):        | 0.0                 |
| Elevation (degrees):            | 35.0                |
| Azimuth (degrees):              | 0.0                 |
| Number Of Channels:             | 2048                |
| Energy Range (keV):             | 20 keV              |
| Energy per Channel (eV):        | 10.0eV              |
| Detector Type Id:               | 29                  |
| Detector Type:                  | X-Max               |
| Window Type:                    | SATW                |
| Pulse Pile Up Correction:       | Succeeded           |
| Primary Detector:               | 2617                |
| Primary Detector Serial Number: | 77871-X080          |

| Element | Line Type | Apparent Concentration | k Ratio | Wt%   | Wt% Sigma | Atomic % | Standard Label | Factory Standard | Standard Calibration Date |
|---------|-----------|------------------------|---------|-------|-----------|----------|----------------|------------------|---------------------------|
| C       | K series  | 5.89                   | 0.05888 | 54.99 | 1.23      | 61.84    | C Vit          | Yes              |                           |
| N       | K series  | 2.28                   | 0.00405 | 16.14 | 1.56      | 15.56    | BN             | Yes              |                           |
| O       | K         | 2.63                   | 0.0088  | 24.00 | 0.75      | 20.26    | SiO2           | Yes              |                           |



|        |          |      |         |        |      |        |        |     |  |
|--------|----------|------|---------|--------|------|--------|--------|-----|--|
|        | series   |      | 4       |        |      |        |        |     |  |
| Na     | K series | 0.54 | 0.00226 | 2.30   | 0.13 | 1.35   | Albite | Yes |  |
| P      | K series | 0.05 | 0.00026 | 0.16   | 0.05 | 0.07   | GaP    | Yes |  |
| Cl     | K series | 0.42 | 0.00367 | 2.22   | 0.12 | 0.85   | NaCl   | Yes |  |
| K      | K series | 0.04 | 0.00031 | 0.19   | 0.06 | 0.06   | KBr    | Yes |  |
| Total: |          |      |         | 100.00 |      | 100.00 |        |     |  |

Electron Image 3

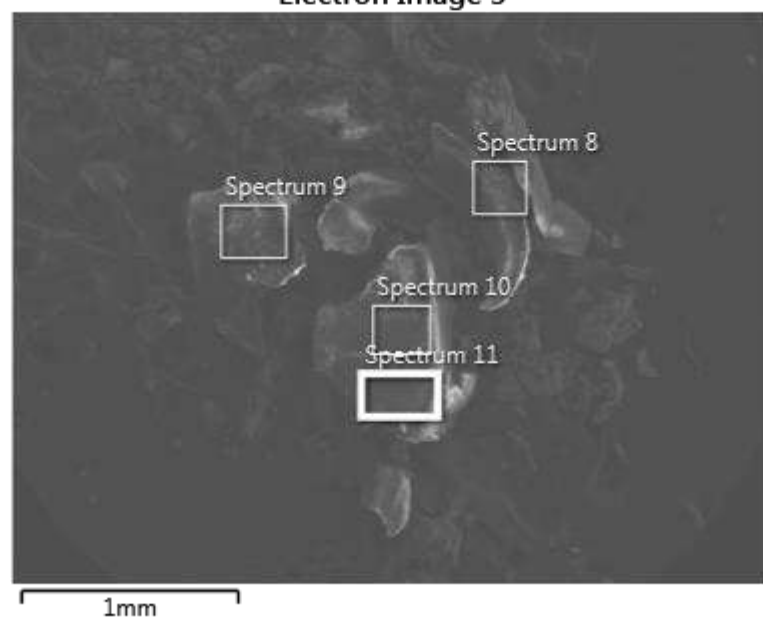

22/01/2020 10:53:40

Project 1

Rumania 4

Dorso 1 15 Kv

Electron Image 4

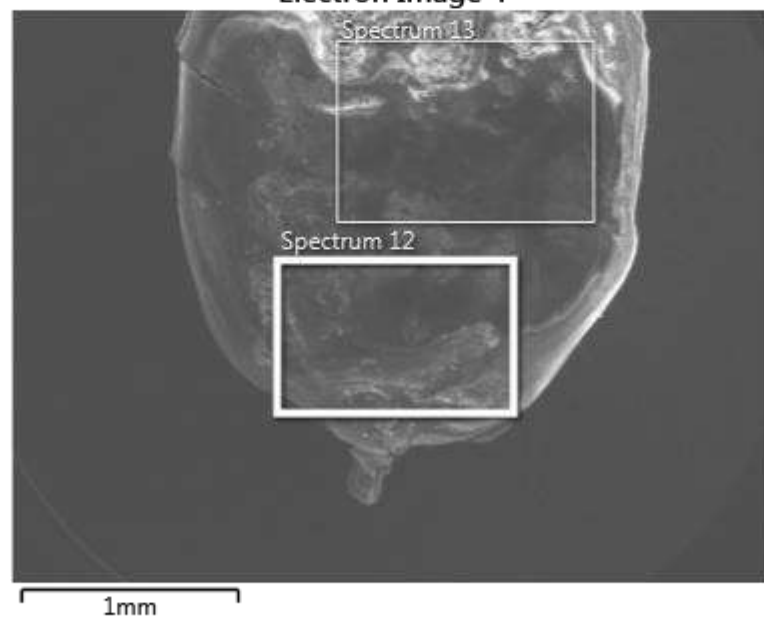

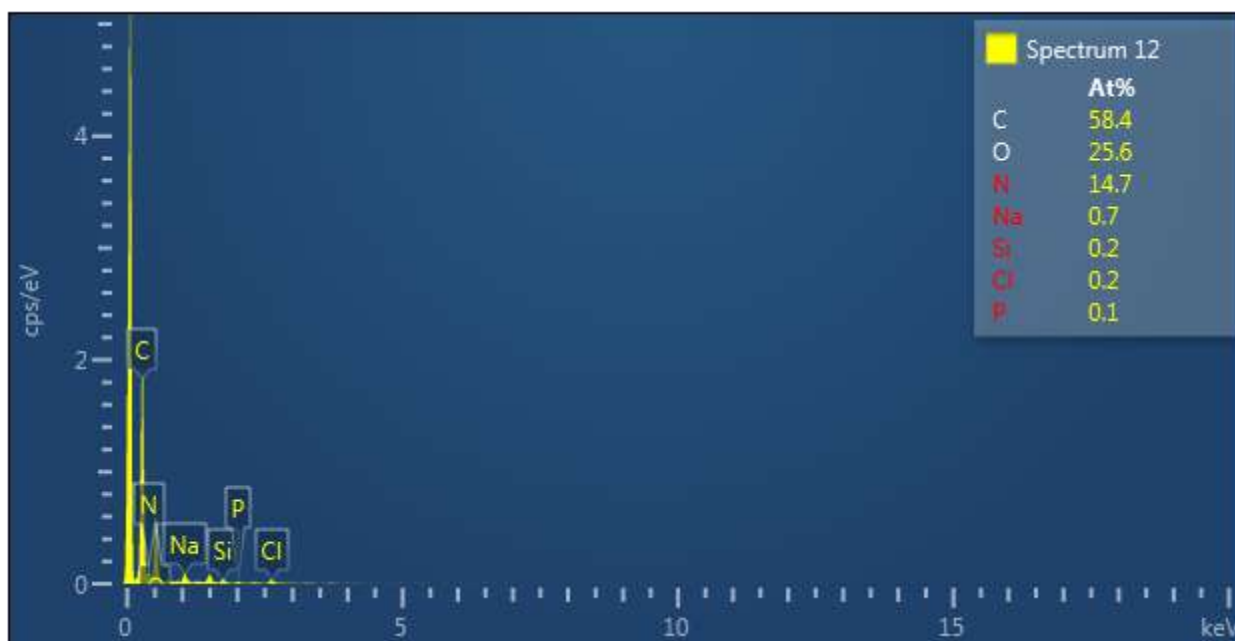

|                                 |                     |
|---------------------------------|---------------------|
| Label:                          | Spectrum 12         |
| Source:                         | Acquired            |
| Created:                        | 22/01/2020 10:53:40 |
| Livetime:                       | 60.4s               |
| Process Time:                   | 4                   |
| Accelerating Voltage:           | 15.00kV             |
| Magnification:                  | 32 x                |
| Working Distance:               | 10.0mm              |
| Specimen Tilt (degrees):        | 0.0                 |
| Elevation (degrees):            | 35.0                |
| Azimuth (degrees):              | 0.0                 |
| Number Of Channels:             | 2048                |
| Energy Range (keV):             | 20 keV              |
| Energy per Channel (eV):        | 10.0eV              |
| Detector Type Id:               | 29                  |
| Detector Type:                  | X-Max               |
| Window Type:                    | SATW                |
| Pulse Pile Up Correction:       | Succeeded           |
| Primary Detector:               | 2617                |
| Primary Detector Serial Number: | 77871-X080          |

| Element | Line Type | Apparent Concentration | k Ratio | Wt%   | Wt% Sigma | Atomic % | Standard Label | Factory Standard | Standard Calibration Date |
|---------|-----------|------------------------|---------|-------|-----------|----------|----------------|------------------|---------------------------|
| C       | K series  | 3.08                   | 0.03076 | 51.98 | 1.56      | 58.44    | C Vit          | Yes              |                           |
| N       | K series  | 1.14                   | 0.00204 | 15.29 | 2.20      | 14.74    | BN             | Yes              |                           |
| O       | K         | 1.74                   | 0.0058  | 30.36 | 1.14      | 25.62    | SiO2           | Yes              |                           |

|        |          |      |         |        |      |        |                  |     |  |
|--------|----------|------|---------|--------|------|--------|------------------|-----|--|
|        | series   |      | 5       |        |      |        |                  |     |  |
| Na     | K series | 0.12 | 0.00053 | 1.15   | 0.14 | 0.67   | Albite           | Yes |  |
| Si     | K series | 0.04 | 0.00036 | 0.47   | 0.07 | 0.23   | SiO <sub>2</sub> | Yes |  |
| P      | K series | 0.03 | 0.00016 | 0.21   | 0.06 | 0.09   | GaP              | Yes |  |
| Cl     | K series | 0.05 | 0.00044 | 0.55   | 0.09 | 0.21   | NaCl             | Yes |  |
| Total: |          |      |         | 100.00 |      | 100.00 |                  |     |  |

Electron Image 4

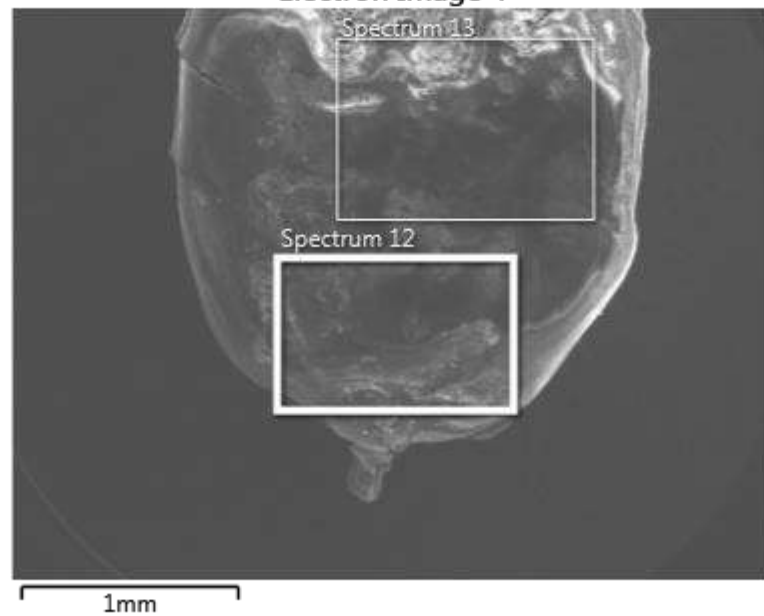

22/01/2020 10:54:47

Project 1

Rumania 4

Dorso 1 15 Kv

Electron Image 4

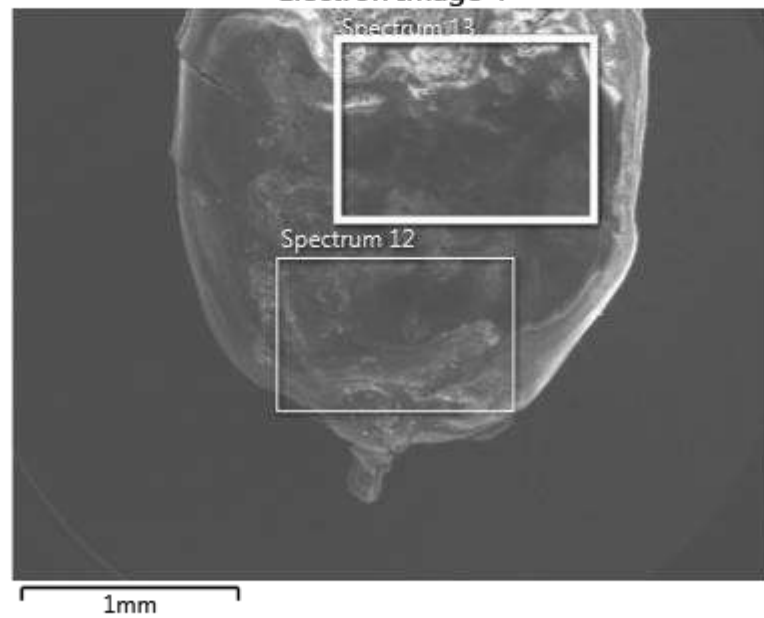

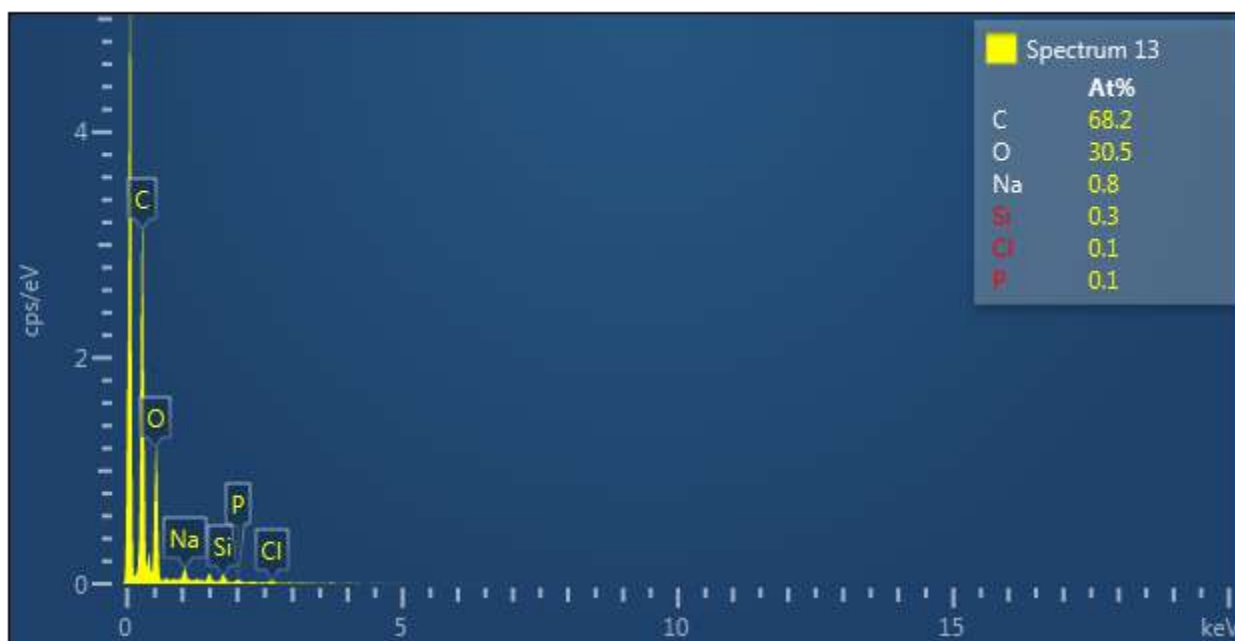

|                                 |                     |
|---------------------------------|---------------------|
| Label:                          | Spectrum 13         |
| Source:                         | Acquired            |
| Created:                        | 22/01/2020 10:54:47 |
| Livetime:                       | 60.4s               |
| Process Time:                   | 4                   |
| Accelerating Voltage:           | 15.00kV             |
| Magnification:                  | 32 x                |
| Working Distance:               | 10.0mm              |
| Specimen Tilt (degrees):        | 0.0                 |
| Elevation (degrees):            | 35.0                |
| Azimuth (degrees):              | 0.0                 |
| Number Of Channels:             | 2048                |
| Energy Range (keV):             | 20 keV              |
| Energy per Channel (eV):        | 10.0eV              |
| Detector Type Id:               | 29                  |
| Detector Type:                  | X-Max               |
| Window Type:                    | SATW                |
| Pulse Pile Up Correction:       | Succeeded           |
| Primary Detector:               | 2617                |
| Primary Detector Serial Number: | 77871-X080          |

| Element | Line Type | Apparent Concentration | k Ratio | Wt%   | Wt% Sigma | Atomic % | Standard Label | Factory Standard | Standard Calibration Date |
|---------|-----------|------------------------|---------|-------|-----------|----------|----------------|------------------|---------------------------|
| C       | K series  | 4.98                   | 0.04980 | 61.07 | 0.70      | 68.19    | C Vit          | Yes              |                           |
| O       | K series  | 3.44                   | 0.01157 | 36.40 | 0.69      | 30.51    | SiO2           | Yes              |                           |
| Na      | K         | 0.19                   | 0.0008  | 1.30  | 0.13      | 0.76     | Albite         | Yes              |                           |

|        |          |      |         |        |      |        |                  |     |  |
|--------|----------|------|---------|--------|------|--------|------------------|-----|--|
|        | series   |      | 1       |        |      |        |                  |     |  |
| Si     | K series | 0.09 | 0.00072 | 0.69   | 0.08 | 0.33   | SiO <sub>2</sub> | Yes |  |
| P      | K series | 0.05 | 0.00026 | 0.25   | 0.07 | 0.11   | GaP              | Yes |  |
| Cl     | K series | 0.04 | 0.00032 | 0.29   | 0.07 | 0.11   | NaCl             | Yes |  |
| Total: |          |      |         | 100.00 |      | 100.00 |                  |     |  |

Electron Image 4

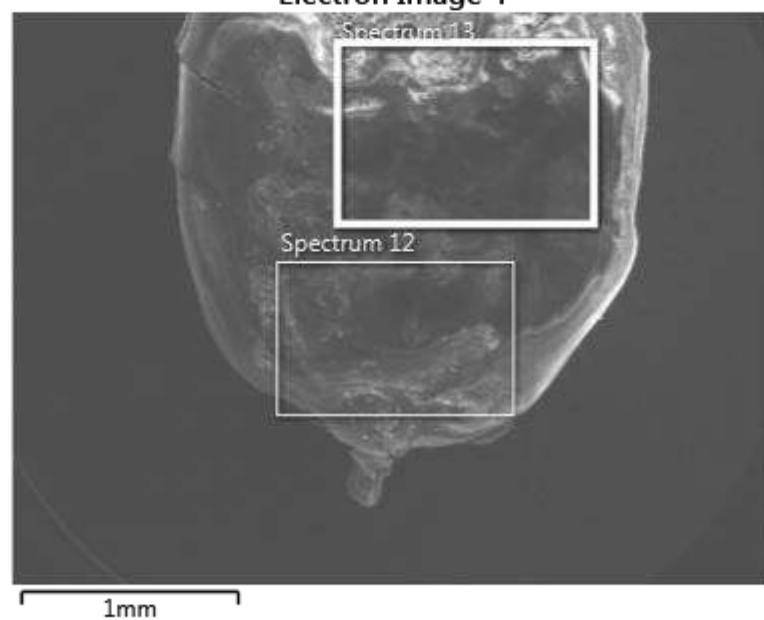

22/01/2020 11:49:38

Project 1

Rumania 4

Dorso 2 15 Kv

Electron Image 5

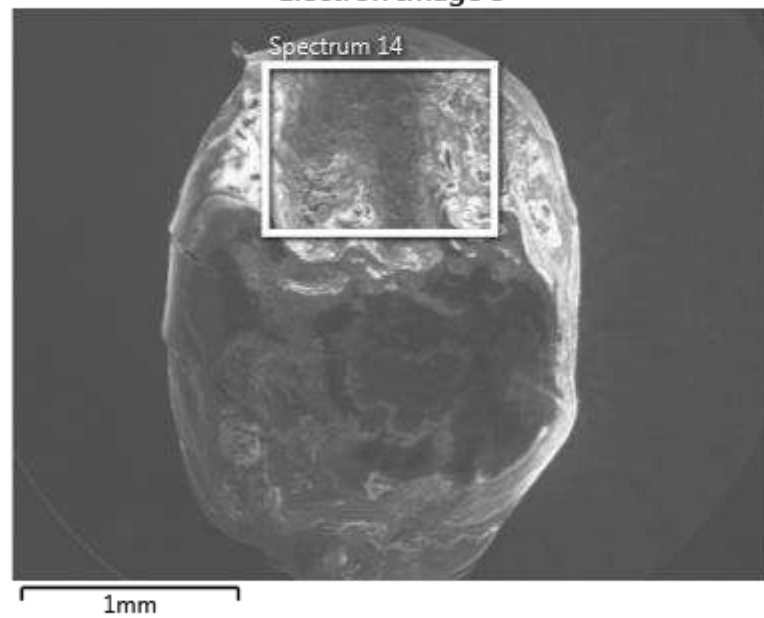



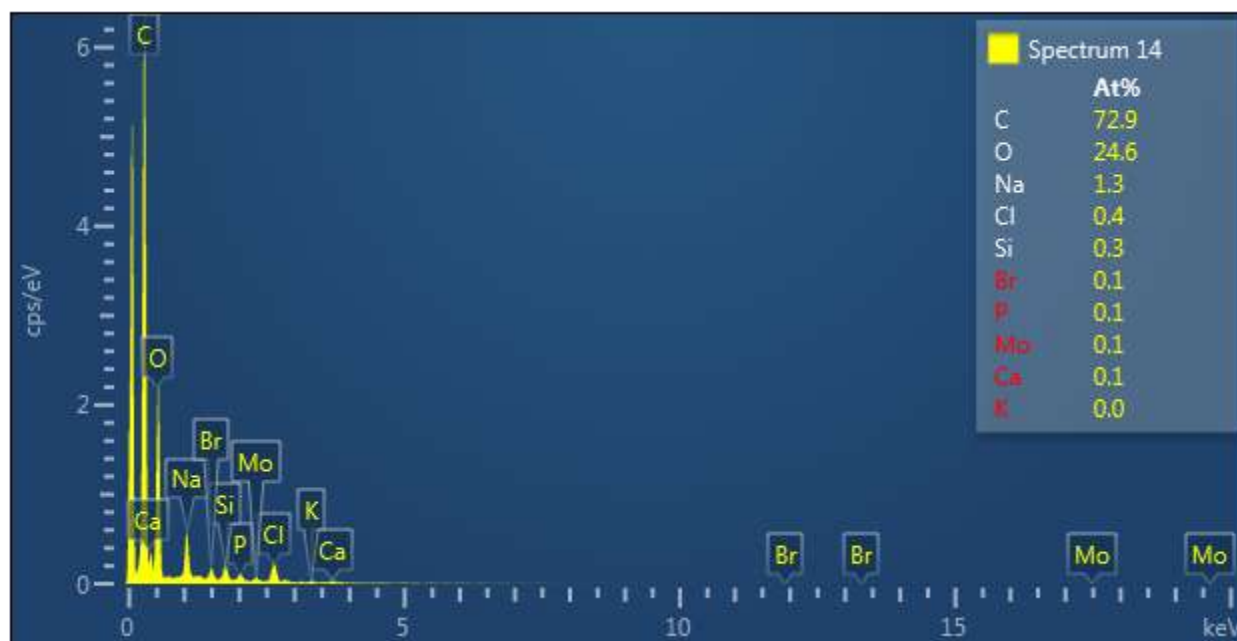

|                                 |                     |
|---------------------------------|---------------------|
| Label:                          | Spectrum 14         |
| Source:                         | Acquired            |
| Created:                        | 22/01/2020 11:49:38 |
| Livetime:                       | 60.4s               |
| Process Time:                   | 4                   |
| Accelerating Voltage:           | 15.00kV             |
| Magnification:                  | 32 x                |
| Working Distance:               | 10.0mm              |
| Specimen Tilt (degrees):        | 0.0                 |
| Elevation (degrees):            | 35.0                |
| Azimuth (degrees):              | 0.0                 |
| Number Of Channels:             | 2048                |
| Energy Range (keV):             | 20 keV              |
| Energy per Channel (eV):        | 10.0eV              |
| Detector Type Id:               | 29                  |
| Detector Type:                  | X-Max               |
| Window Type:                    | SATW                |
| Pulse Pile Up Correction:       | Succeeded           |
| Primary Detector:               | 2617                |
| Primary Detector Serial Number: | 77871-X080          |

| Element | Line Type | Apparent Concentration | k Ratio | Wt%   | Wt% Sigma | Atomic % | Standard Label | Factory Standard | Standard Calibration Date |
|---------|-----------|------------------------|---------|-------|-----------|----------|----------------|------------------|---------------------------|
| C       | K series  | 11.65                  | 0.11645 | 64.89 | 0.57      | 72.92    | C Vit          | Yes              |                           |
| O       | K series  | 6.31                   | 0.02125 | 29.17 | 0.52      | 24.61    | SiO2           | Yes              |                           |
| Na      | K         | 0.86                   | 0.0036  | 2.20  | 0.09      | 1.29     | Albite         | Yes              |                           |

|        |          |      |         |        |      |        |                  |     |  |
|--------|----------|------|---------|--------|------|--------|------------------|-----|--|
|        | series   |      | 4       |        |      |        |                  |     |  |
| Si     | K series | 0.20 | 0.00155 | 0.59   | 0.05 | 0.29   | SiO <sub>2</sub> | Yes |  |
| P      | K series | 0.14 | 0.00077 | 0.29   | 0.04 | 0.13   | GaP              | Yes |  |
| Cl     | K series | 0.36 | 0.00313 | 1.15   | 0.07 | 0.44   | NaCl             | Yes |  |
| K      | K series | 0.05 | 0.00039 | 0.14   | 0.04 | 0.05   | KBr              | Yes |  |
| Ca     | K series | 0.05 | 0.00044 | 0.15   | 0.04 | 0.05   | Wollastonite     | Yes |  |
| Br     | L series | 0.22 | 0.00196 | 0.85   | 0.09 | 0.14   | KBr              | Yes |  |
| Mo     | L series | 0.14 | 0.00141 | 0.56   | 0.12 | 0.08   | Mo               | Yes |  |
| Total: |          |      |         | 100.00 |      | 100.00 |                  |     |  |

Electron Image 5

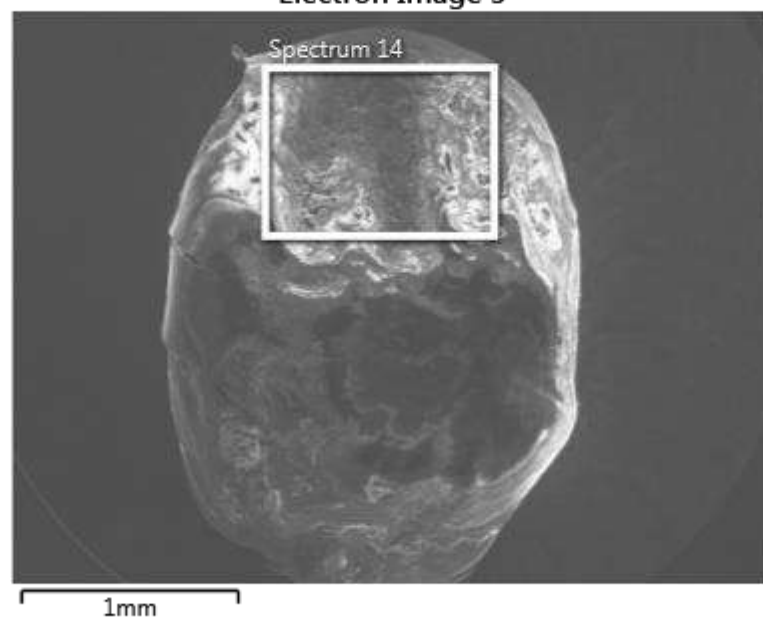

22/01/2020 11:52:36

Project 1

Rumania 5

Dorso 1 15 Kv

Electron Image 6

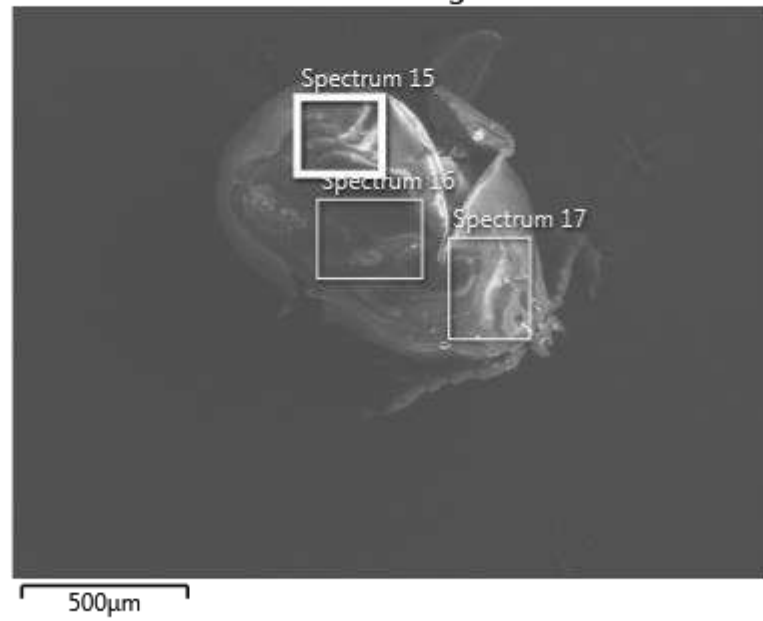

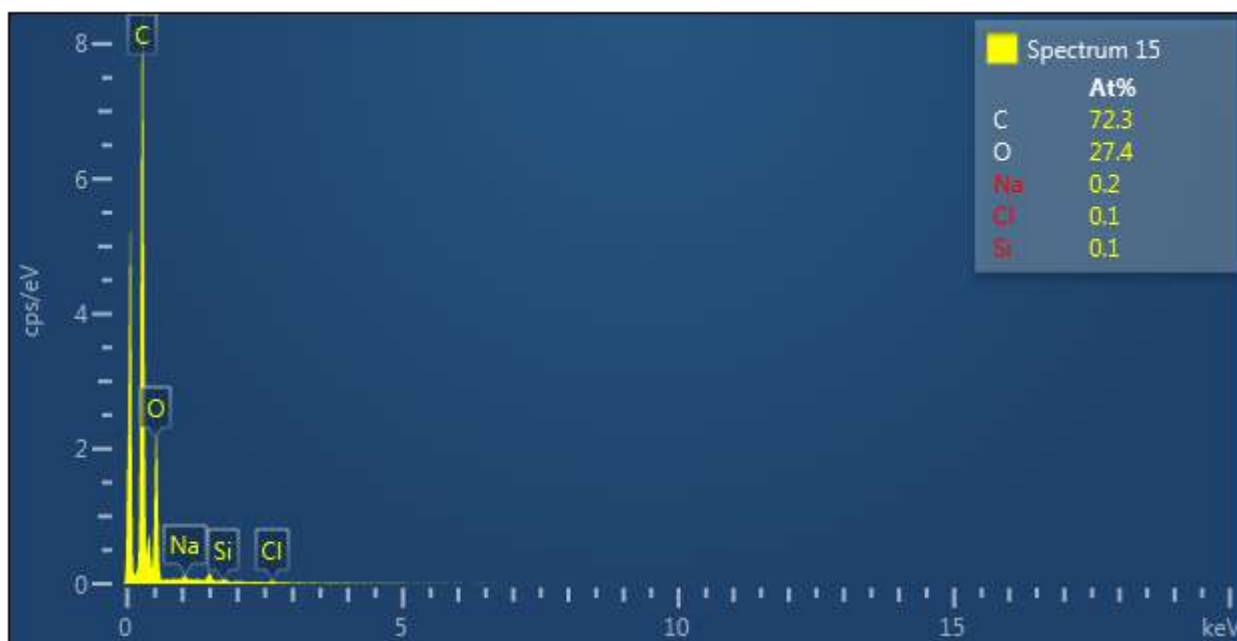

|                                 |                     |
|---------------------------------|---------------------|
| Label:                          | Spectrum 15         |
| Source:                         | Acquired            |
| Created:                        | 22/01/2020 11:52:36 |
| Livetime:                       | 60.5s               |
| Process Time:                   | 4                   |
| Accelerating Voltage:           | 15.00kV             |
| Magnification:                  | 49 x                |
| Working Distance:               | 10.0mm              |
| Specimen Tilt (degrees):        | 0.0                 |
| Elevation (degrees):            | 35.0                |
| Azimuth (degrees):              | 0.0                 |
| Number Of Channels:             | 2048                |
| Energy Range (keV):             | 20 keV              |
| Energy per Channel (eV):        | 10.0eV              |
| Detector Type Id:               | 29                  |
| Detector Type:                  | X-Max               |
| Window Type:                    | SATW                |
| Pulse Pile Up Correction:       | Succeeded           |
| Primary Detector:               | 2617                |
| Primary Detector Serial Number: | 77871-X080          |

| Element | Line Type | Apparent Concentration | k Ratio | Wt%   | Wt% Sigma | Atomic % | Standard Label | Factory Standard | Standard Calibration Date |
|---------|-----------|------------------------|---------|-------|-----------|----------|----------------|------------------|---------------------------|
| C       | K series  | 13.23                  | 0.13226 | 65.98 | 0.48      | 72.25    | C Vit          | Yes              |                           |
| O       | K series  | 6.40                   | 0.02152 | 33.34 | 0.47      | 27.41    | SiO2           | Yes              |                           |
| Na      | K         | 0.11                   | 0.0004  | 0.35  | 0.07      | 0.20     | Albite         | Yes              |                           |

|        |          |      |         |        |      |        |                  |     |  |
|--------|----------|------|---------|--------|------|--------|------------------|-----|--|
|        | series   |      | 7       |        |      |        |                  |     |  |
| Si     | K series | 0.04 | 0.00034 | 0.15   | 0.04 | 0.07   | SiO <sub>2</sub> | Yes |  |
| Cl     | K series | 0.05 | 0.00045 | 0.19   | 0.04 | 0.07   | NaCl             | Yes |  |
| Total: |          |      |         | 100.00 |      | 100.00 |                  |     |  |

Electron Image 6

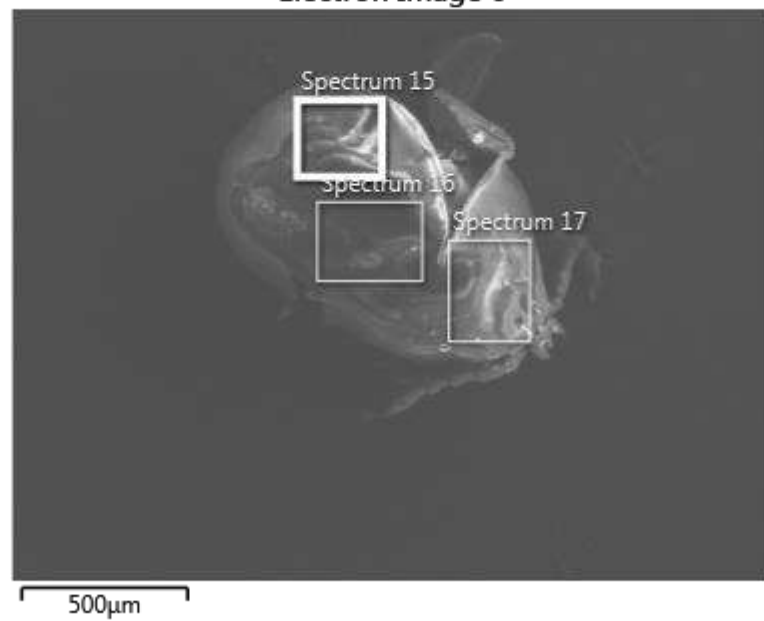

22/01/2020 11:53:50

Project 1

Rumania 5

Dorso 1 15 Kv

Electron Image 6

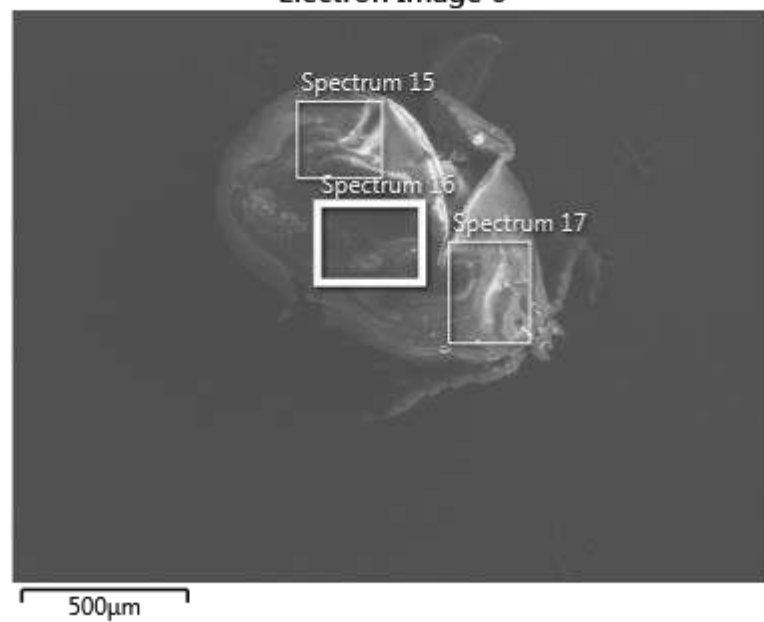

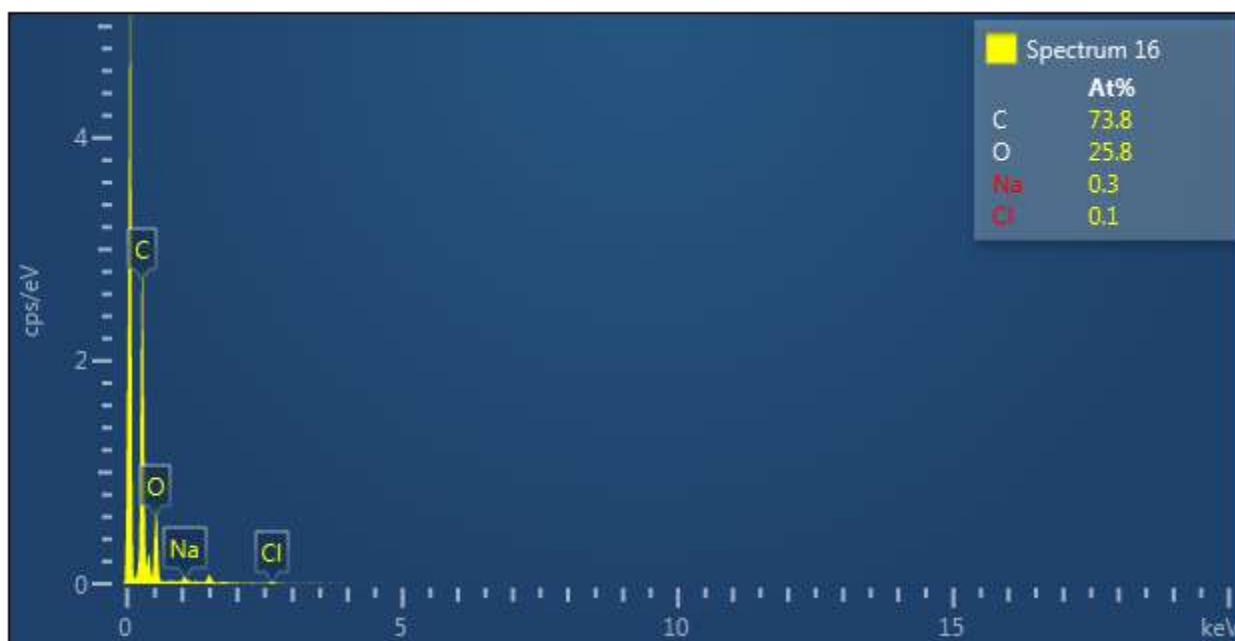

|                                 |                     |
|---------------------------------|---------------------|
| Label:                          | Spectrum 16         |
| Source:                         | Acquired            |
| Created:                        | 22/01/2020 11:53:50 |
| Livetime:                       | 60.4s               |
| Process Time:                   | 4                   |
| Accelerating Voltage:           | 15.00kV             |
| Magnification:                  | 49 x                |
| Working Distance:               | 10.0mm              |
| Specimen Tilt (degrees):        | 0.0                 |
| Elevation (degrees):            | 35.0                |
| Azimuth (degrees):              | 0.0                 |
| Number Of Channels:             | 2048                |
| Energy Range (keV):             | 20 keV              |
| Energy per Channel (eV):        | 10.0eV              |
| Detector Type Id:               | 29                  |
| Detector Type:                  | X-Max               |
| Window Type:                    | SATW                |
| Pulse Pile Up Correction:       | Succeeded           |
| Primary Detector:               | 2617                |
| Primary Detector Serial Number: | 77871-X080          |

| Element | Line Type | Apparent Concentration | k Ratio | Wt%   | Wt% Sigma | Atomic % | Standard Label | Factory Standard | Standard Calibration Date |
|---------|-----------|------------------------|---------|-------|-----------|----------|----------------|------------------|---------------------------|
| C       | K series  | 4.44                   | 0.04438 | 67.63 | 0.84      | 73.75    | C Vit          | Yes              |                           |
| O       | K series  | 1.91                   | 0.00643 | 31.53 | 0.84      | 25.82    | SiO2           | Yes              |                           |
| Na      | K         | 0.06                   | 0.0002  | 0.59  | 0.13      | 0.34     | Albite         | Yes              |                           |

|        |          |      |         |        |      |        |      |     |  |
|--------|----------|------|---------|--------|------|--------|------|-----|--|
|        | series   |      | 6       |        |      |        |      |     |  |
| Cl     | K series | 0.02 | 0.00019 | 0.25   | 0.07 | 0.09   | NaCl | Yes |  |
| Total: |          |      |         | 100.00 |      | 100.00 |      |     |  |

Electron Image 6

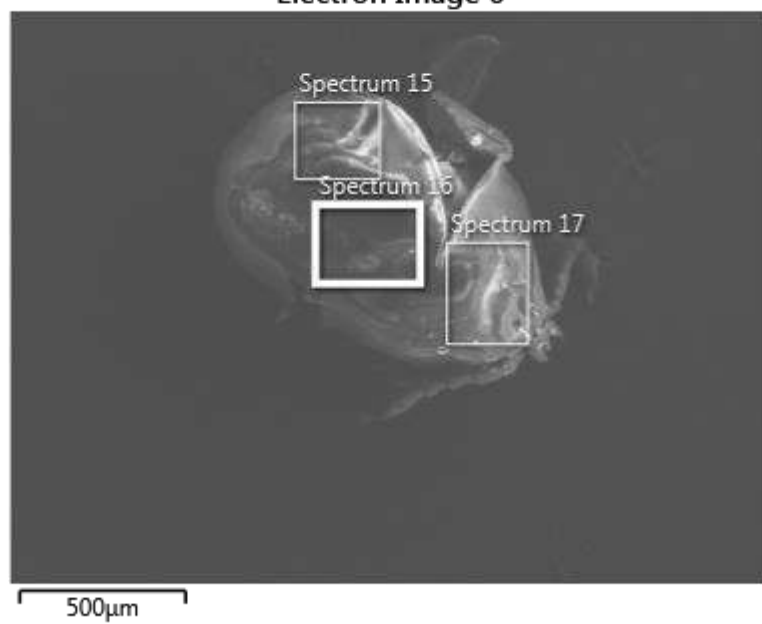



22/01/2020 11:55:01

Project 1

Rumania 5

Dorso 1 15 Kv

Electron Image 6

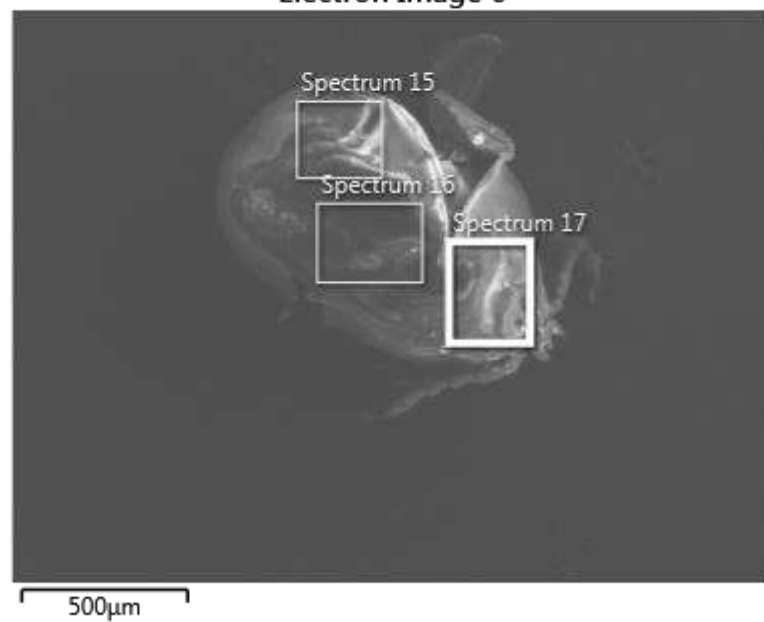

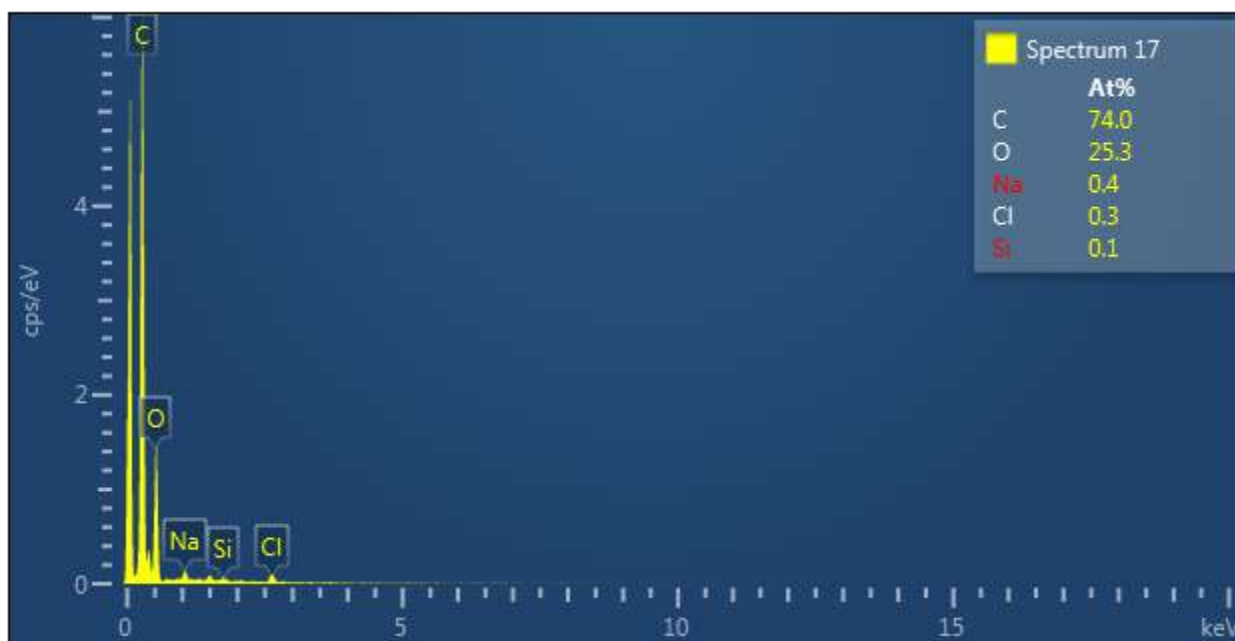

|                                 |                     |
|---------------------------------|---------------------|
| Label:                          | Spectrum 17         |
| Source:                         | Acquired            |
| Created:                        | 22/01/2020 11:55:01 |
| Livetime:                       | 60.5s               |
| Process Time:                   | 4                   |
| Accelerating Voltage:           | 15.00kV             |
| Magnification:                  | 49 x                |
| Working Distance:               | 10.0mm              |
| Specimen Tilt (degrees):        | 0.0                 |
| Elevation (degrees):            | 35.0                |
| Azimuth (degrees):              | 0.0                 |
| Number Of Channels:             | 2048                |
| Energy Range (keV):             | 20 keV              |
| Energy per Channel (eV):        | 10.0eV              |
| Detector Type Id:               | 29                  |
| Detector Type:                  | X-Max               |
| Window Type:                    | SATW                |
| Pulse Pile Up Correction:       | Succeeded           |
| Primary Detector:               | 2617                |
| Primary Detector Serial Number: | 77871-X080          |

| Element | Line Type | Apparent Concentration | k Ratio | Wt%   | Wt% Sigma | Atomic % | Standard Label | Factory Standard | Standard Calibration Date |
|---------|-----------|------------------------|---------|-------|-----------|----------|----------------|------------------|---------------------------|
| C       | K series  | 9.45                   | 0.09449 | 67.59 | 0.54      | 73.95    | C Vit          | Yes              |                           |
| O       | K series  | 4.24                   | 0.01425 | 30.80 | 0.54      | 25.30    | SiO2           | Yes              |                           |
| Na      | K         | 0.16                   | 0.0006  | 0.64  | 0.08      | 0.37     | Albite         | Yes              |                           |

|        |          |      |         |        |      |        |                  |     |  |
|--------|----------|------|---------|--------|------|--------|------------------|-----|--|
|        | series   |      | 7       |        |      |        |                  |     |  |
| Si     | K series | 0.04 | 0.00034 | 0.20   | 0.05 | 0.09   | SiO <sub>2</sub> | Yes |  |
| Cl     | K series | 0.15 | 0.00133 | 0.76   | 0.07 | 0.28   | NaCl             | Yes |  |
| Total: |          |      |         | 100.00 |      | 100.00 |                  |     |  |

Electron Image 6

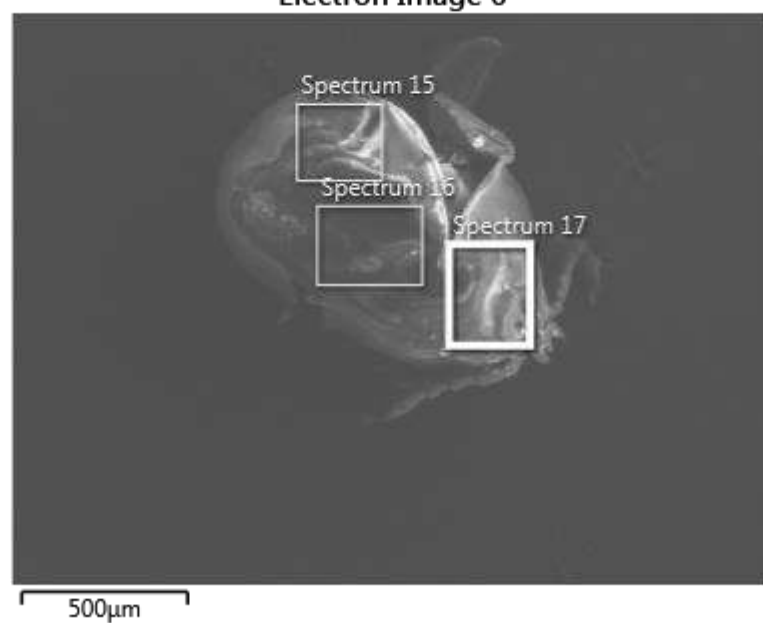

22/01/2020 11:57:31

Project 1

Rumania 6

Dorso 1 15 Kv

Electron Image 7

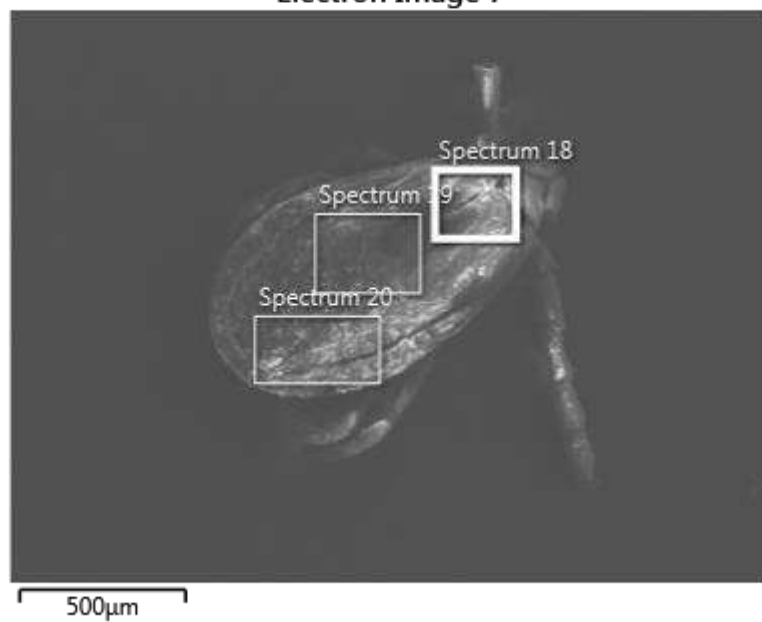

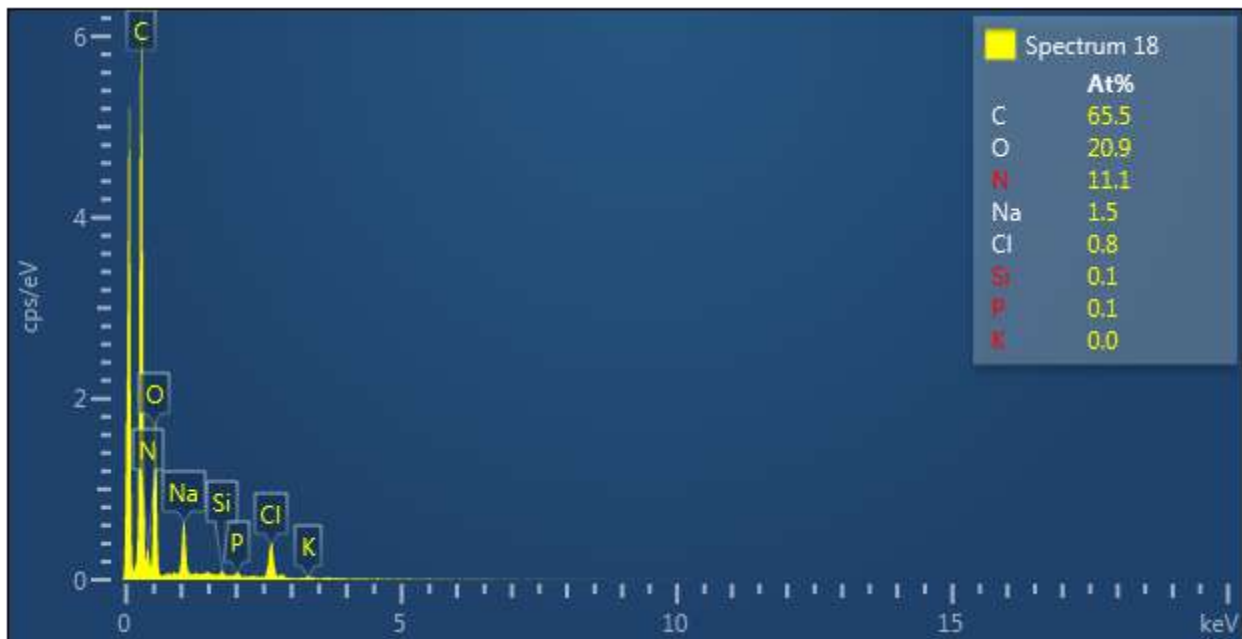

|                                 |                     |
|---------------------------------|---------------------|
| Label:                          | Spectrum 18         |
| Source:                         | Acquired            |
| Created:                        | 22/01/2020 11:57:31 |
| Livetime:                       | 60.3s               |
| Process Time:                   | 4                   |
| Accelerating Voltage:           | 15.00kV             |
| Magnification:                  | 49 x                |
| Working Distance:               | 10.0mm              |
| Specimen Tilt (degrees):        | 0.0                 |
| Elevation (degrees):            | 35.0                |
| Azimuth (degrees):              | 0.0                 |
| Number Of Channels:             | 2048                |
| Energy Range (keV):             | 20 keV              |
| Energy per Channel (eV):        | 10.0eV              |
| Detector Type Id:               | 29                  |
| Detector Type:                  | X-Max               |
| Window Type:                    | SATW                |
| Pulse Pile Up Correction:       | Succeeded           |
| Primary Detector:               | 2617                |
| Primary Detector Serial Number: | 77871-X080          |

| Element | Line Type | Apparent Concentration | k Ratio | Wt%   | Wt% Sigma | Atomic % | Standard Label | Factory Standard | Standard Calibration Date |
|---------|-----------|------------------------|---------|-------|-----------|----------|----------------|------------------|---------------------------|
| C       | K series  | 11.05                  | 0.11048 | 58.50 | 0.98      | 65.52    | C Vit          | Yes              |                           |
| N       | K series  | 2.68                   | 0.00478 | 11.55 | 1.25      | 11.10    | BN             | Yes              |                           |
| O       | K         | 4.98                   | 0.0167  | 24.88 | 0.58      | 20.92    | SiO2           | Yes              |                           |

|        |          |      |         |        |      |        |                  |     |  |
|--------|----------|------|---------|--------|------|--------|------------------|-----|--|
|        | series   |      | 6       |        |      |        |                  |     |  |
| Na     | K series | 1.03 | 0.00434 | 2.49   | 0.10 | 1.46   | Albite           | Yes |  |
| Si     | K series | 0.06 | 0.00051 | 0.18   | 0.04 | 0.09   | SiO <sub>2</sub> | Yes |  |
| P      | K series | 0.10 | 0.00055 | 0.20   | 0.04 | 0.08   | GaP              | Yes |  |
| Cl     | K series | 0.68 | 0.00597 | 2.06   | 0.08 | 0.78   | NaCl             | Yes |  |
| K      | K series | 0.04 | 0.00038 | 0.13   | 0.04 | 0.04   | KBr              | Yes |  |
| Total: |          |      |         | 100.00 |      | 100.00 |                  |     |  |

Electron Image 7

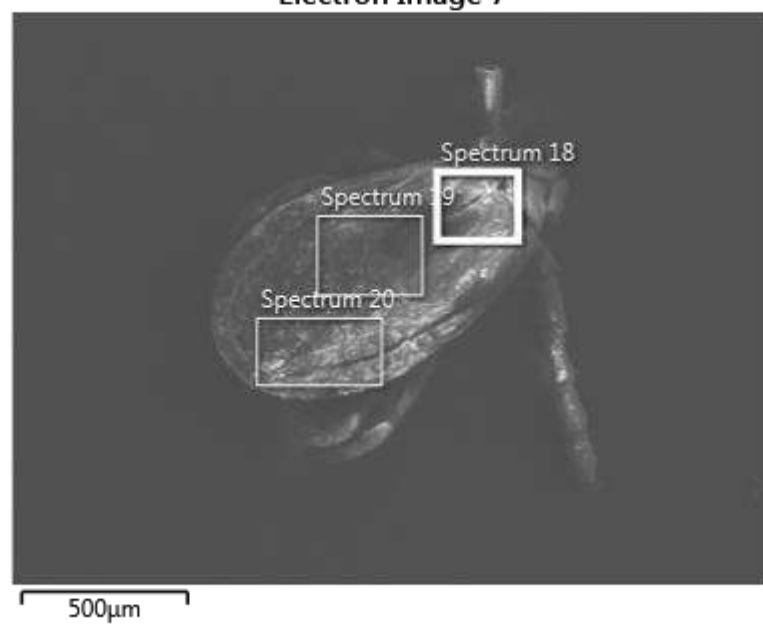

22/01/2020 11:58:45

Project 1

Rumania 6

Dorso 1 15 Kv

Electron Image 7

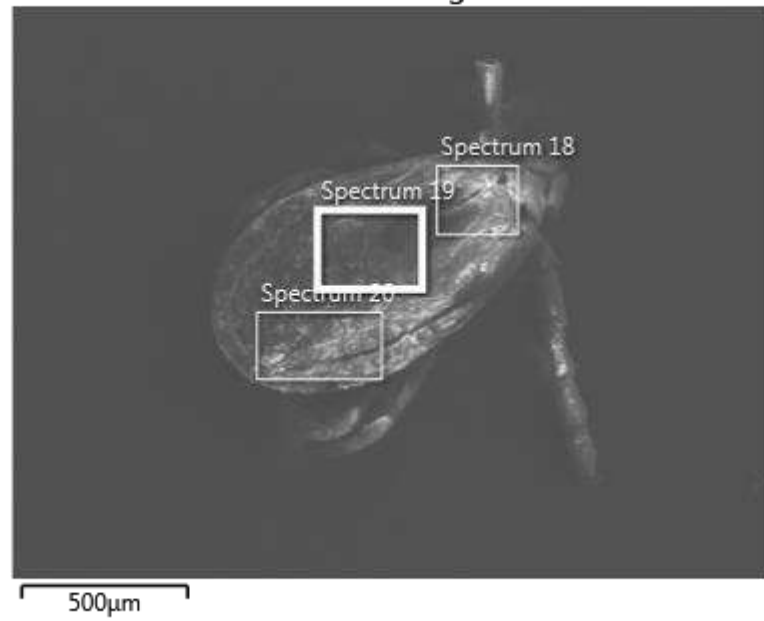

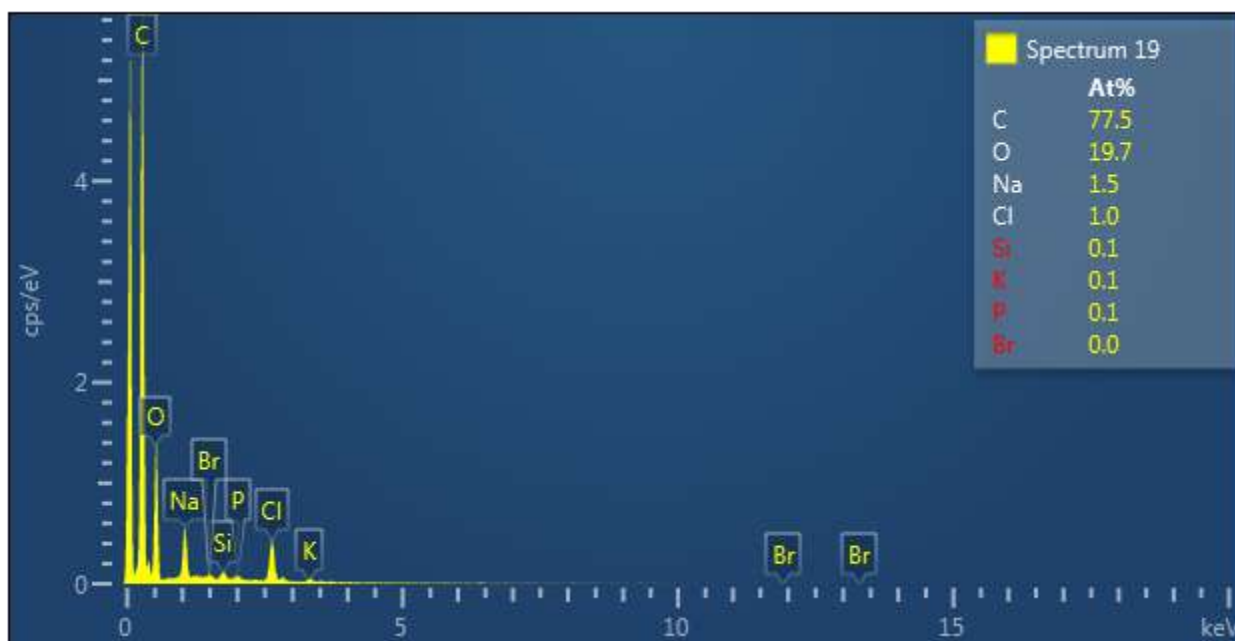

|                                 |                     |
|---------------------------------|---------------------|
| Label:                          | Spectrum 19         |
| Source:                         | Acquired            |
| Created:                        | 22/01/2020 11:58:45 |
| Livetime:                       | 60.4s               |
| Process Time:                   | 4                   |
| Accelerating Voltage:           | 15.00kV             |
| Magnification:                  | 49 x                |
| Working Distance:               | 10.0mm              |
| Specimen Tilt (degrees):        | 0.0                 |
| Elevation (degrees):            | 35.0                |
| Azimuth (degrees):              | 0.0                 |
| Number Of Channels:             | 2048                |
| Energy Range (keV):             | 20 keV              |
| Energy per Channel (eV):        | 10.0eV              |
| Detector Type Id:               | 29                  |
| Detector Type:                  | X-Max               |
| Window Type:                    | SATW                |
| Pulse Pile Up Correction:       | Succeeded           |
| Primary Detector:               | 2617                |
| Primary Detector Serial Number: | 77871-X080          |

| Element | Line Type | Apparent Concentration | k Ratio | Wt%   | Wt% Sigma | Atomic % | Standard Label | Factory Standard | Standard Calibration Date |
|---------|-----------|------------------------|---------|-------|-----------|----------|----------------|------------------|---------------------------|
| C       | K series  | 9.89                   | 0.09894 | 70.01 | 0.55      | 77.48    | C Vit          | Yes              |                           |
| O       | K series  | 3.93                   | 0.01323 | 23.66 | 0.51      | 19.66    | SiO2           | Yes              |                           |
| Na      | K         | 0.86                   | 0.0036  | 2.57  | 0.11      | 1.48     | Albite         | Yes              |                           |



|        |          |      |         |        |      |        |                  |     |  |
|--------|----------|------|---------|--------|------|--------|------------------|-----|--|
|        | series   |      | 4       |        |      |        |                  |     |  |
| Si     | K series | 0.09 | 0.00069 | 0.31   | 0.05 | 0.15   | SiO <sub>2</sub> | Yes |  |
| P      | K series | 0.06 | 0.00036 | 0.16   | 0.05 | 0.07   | GaP              | Yes |  |
| Cl     | K series | 0.71 | 0.00623 | 2.72   | 0.10 | 1.02   | NaCl             | Yes |  |
| K      | K series | 0.07 | 0.00062 | 0.27   | 0.06 | 0.09   | KBr              | Yes |  |
| Br     | L series | 0.06 | 0.00056 | 0.29   | 0.09 | 0.05   | KBr              | Yes |  |
| Total: |          |      |         | 100.00 |      | 100.00 |                  |     |  |

Electron Image 7

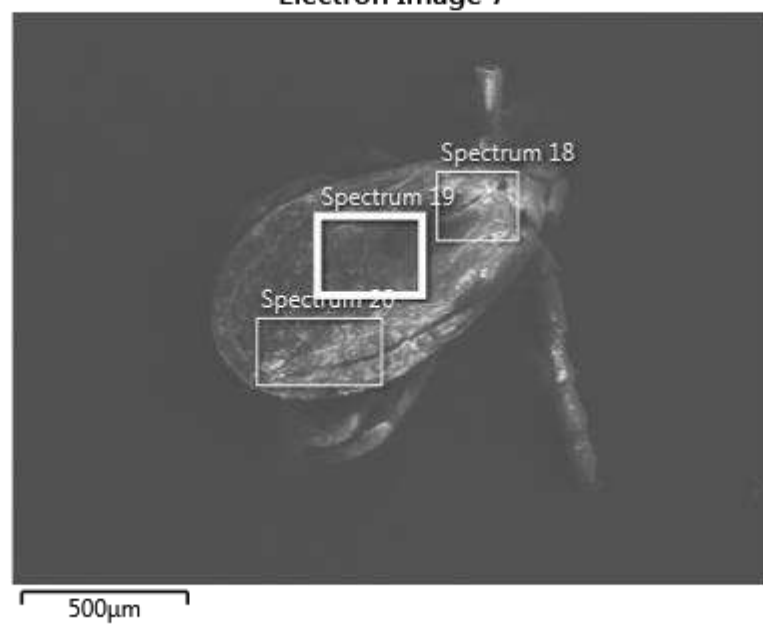

22/01/2020 11:59:57

Project 1

Rumania 6

Dorso 1 15 Kv

Electron Image 7

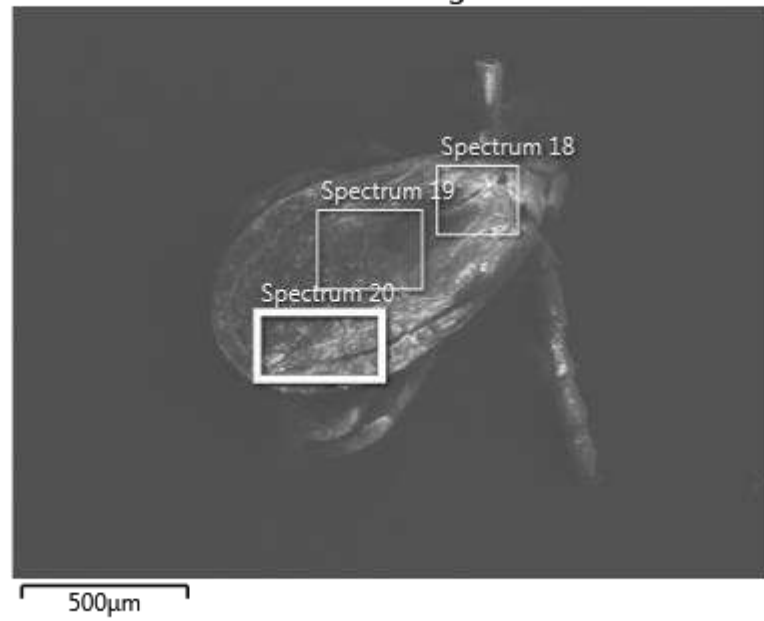

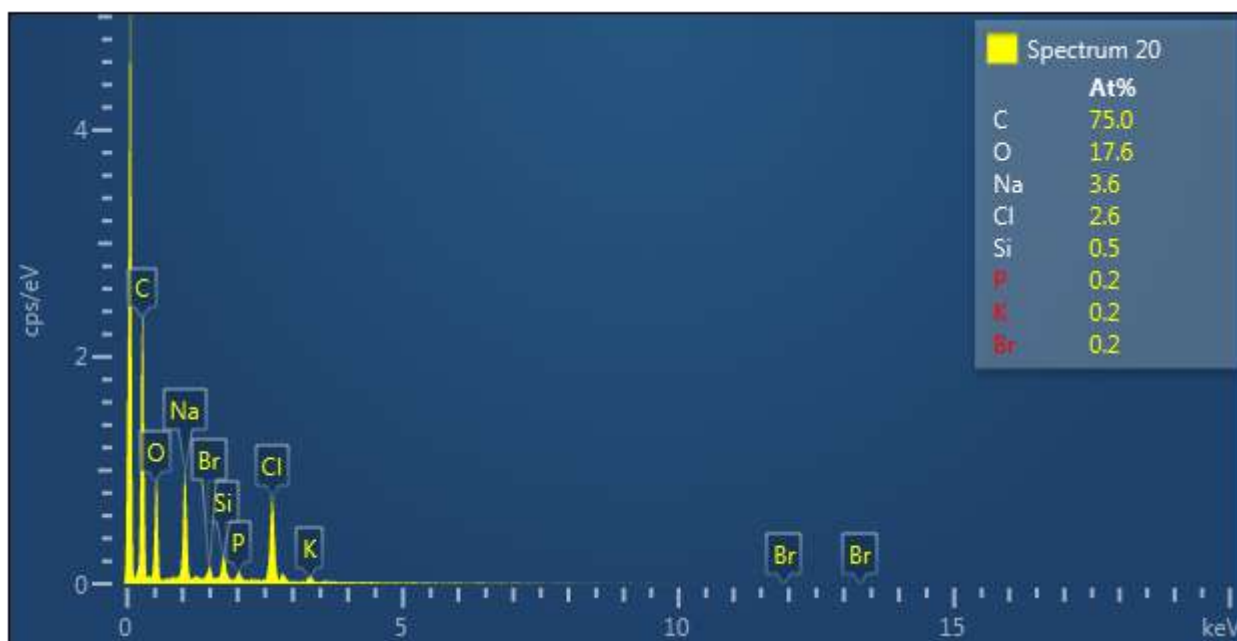

|                                 |                     |
|---------------------------------|---------------------|
| Label:                          | Spectrum 20         |
| Source:                         | Acquired            |
| Created:                        | 22/01/2020 11:59:57 |
| Livetime:                       | 60.1s               |
| Process Time:                   | 4                   |
| Accelerating Voltage:           | 15.00kV             |
| Magnification:                  | 49 x                |
| Working Distance:               | 10.0mm              |
| Specimen Tilt (degrees):        | 0.0                 |
| Elevation (degrees):            | 35.0                |
| Azimuth (degrees):              | 0.0                 |
| Number Of Channels:             | 2048                |
| Energy Range (keV):             | 20 keV              |
| Energy per Channel (eV):        | 10.0eV              |
| Detector Type Id:               | 29                  |
| Detector Type:                  | X-Max               |
| Window Type:                    | SATW                |
| Pulse Pile Up Correction:       | Succeeded           |
| Primary Detector:               | 2617                |
| Primary Detector Serial Number: | 77871-X080          |

| Element | Line Type | Apparent Concentration | k Ratio | Wt%   | Wt% Sigma | Atomic % | Standard Label | Factory Standard | Standard Calibration Date |
|---------|-----------|------------------------|---------|-------|-----------|----------|----------------|------------------|---------------------------|
| C       | K series  | 4.35                   | 0.04354 | 64.11 | 0.74      | 74.97    | C Vit          | Yes              |                           |
| O       | K series  | 2.60                   | 0.00875 | 20.07 | 0.57      | 17.62    | SiO2           | Yes              |                           |
| Na      | K         | 1.62                   | 0.0068  | 5.96  | 0.19      | 3.64     | Albite         | Yes              |                           |

|        |          |      |         |        |      |        |                  |     |  |
|--------|----------|------|---------|--------|------|--------|------------------|-----|--|
|        | series   |      | 5       |        |      |        |                  |     |  |
| Si     | K series | 0.23 | 0.00186 | 1.09   | 0.08 | 0.55   | SiO <sub>2</sub> | Yes |  |
| P      | K series | 0.16 | 0.00092 | 0.53   | 0.07 | 0.24   | GaP              | Yes |  |
| Cl     | K series | 1.31 | 0.01146 | 6.46   | 0.19 | 2.56   | NaCl             | Yes |  |
| K      | K series | 0.13 | 0.00106 | 0.60   | 0.08 | 0.22   | KBr              | Yes |  |
| Br     | L series | 0.20 | 0.00175 | 1.17   | 0.13 | 0.21   | KBr              | Yes |  |
| Total: |          |      |         | 100.00 |      | 100.00 |                  |     |  |

Electron Image 7

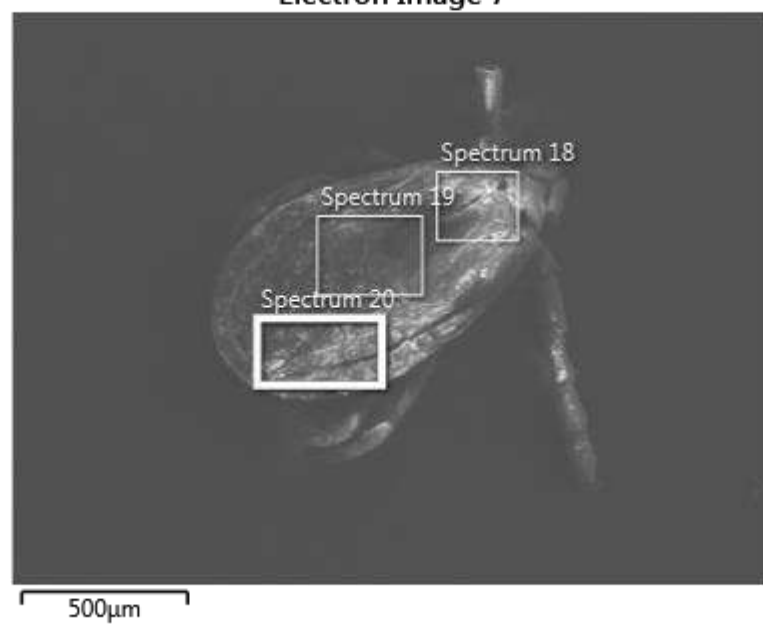

22/01/2020 12:02:29

Project 1

Rumania 7

Dorso 1 15 Kv

Electron Image 8

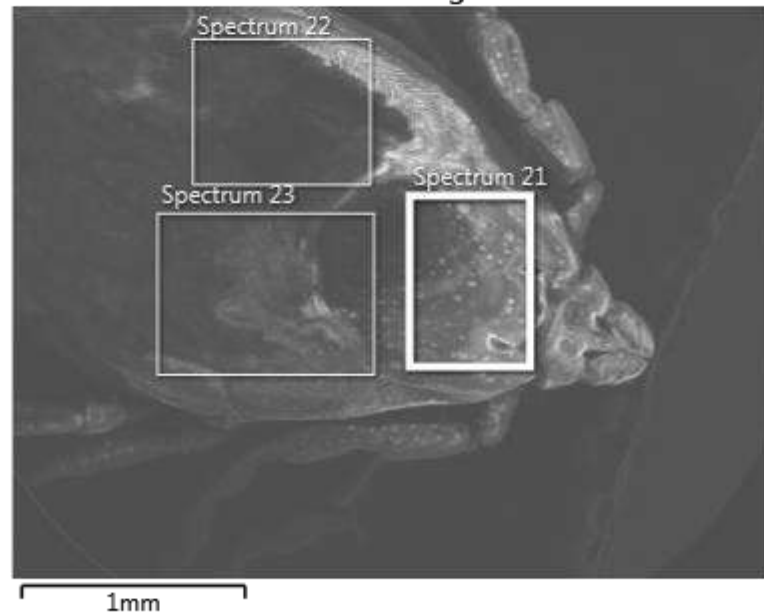

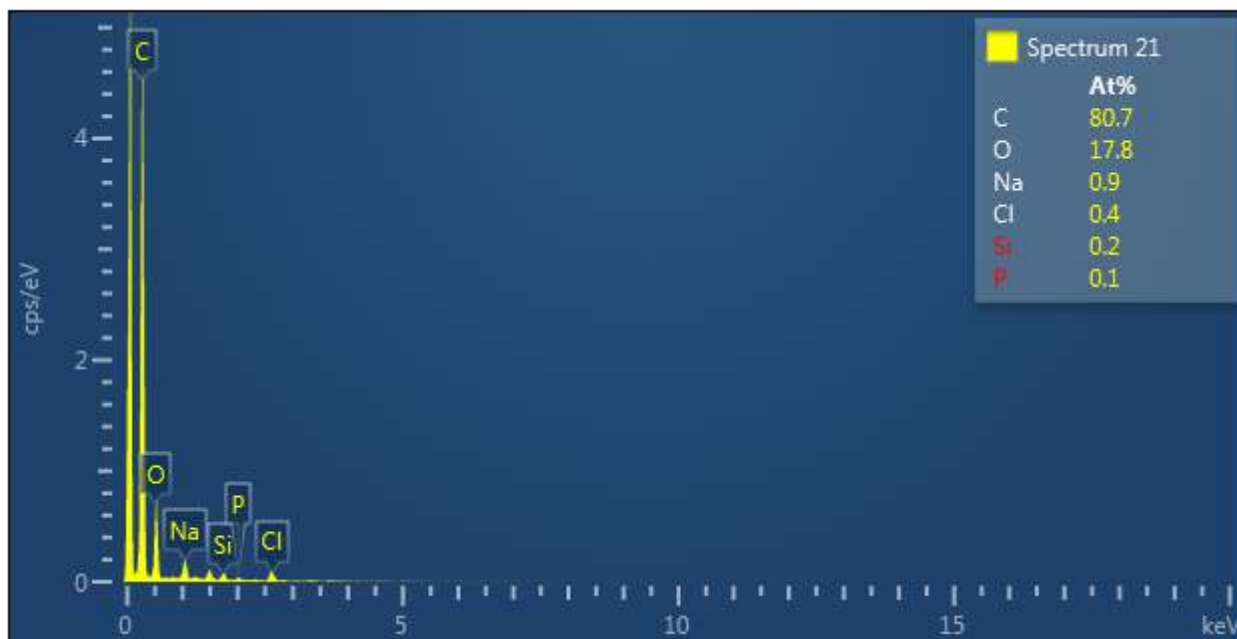

|                                 |                     |
|---------------------------------|---------------------|
| Label:                          | Spectrum 21         |
| Source:                         | Acquired            |
| Created:                        | 22/01/2020 12:02:29 |
| Livetime:                       | 60.0s               |
| Process Time:                   | 4                   |
| Accelerating Voltage:           | 15.00kV             |
| Magnification:                  | 33 x                |
| Working Distance:               | 10.0mm              |
| Specimen Tilt (degrees):        | 0.0                 |
| Elevation (degrees):            | 35.0                |
| Azimuth (degrees):              | 0.0                 |
| Number Of Channels:             | 2048                |
| Energy Range (keV):             | 20 keV              |
| Energy per Channel (eV):        | 10.0eV              |
| Detector Type Id:               | 29                  |
| Detector Type:                  | X-Max               |
| Window Type:                    | SATW                |
| Pulse Pile Up Correction:       | Succeeded           |
| Primary Detector:               | 2617                |
| Primary Detector Serial Number: | 77871-X080          |

| Element | Line Type | Apparent Concentration | k Ratio | Wt%   | Wt% Sigma | Atomic % | Standard Label | Factory Standard | Standard Calibration Date |
|---------|-----------|------------------------|---------|-------|-----------|----------|----------------|------------------|---------------------------|
| C       | K series  | 7.58                   | 0.07583 | 74.80 | 0.61      | 80.66    | C Vit          | Yes              |                           |
| O       | K series  | 2.00                   | 0.00672 | 22.03 | 0.60      | 17.83    | SiO2           | Yes              |                           |
| Na      | K         | 0.29                   | 0.0012  | 1.52  | 0.12      | 0.85     | Albite         | Yes              |                           |

|        |          |      |         |        |      |        |                  |     |  |
|--------|----------|------|---------|--------|------|--------|------------------|-----|--|
|        | series   |      | 2       |        |      |        |                  |     |  |
| Si     | K series | 0.08 | 0.00061 | 0.48   | 0.06 | 0.22   | SiO <sub>2</sub> | Yes |  |
| P      | K series | 0.04 | 0.00024 | 0.19   | 0.06 | 0.08   | GaP              | Yes |  |
| Cl     | K series | 0.14 | 0.00126 | 0.98   | 0.09 | 0.36   | NaCl             | Yes |  |
| Total: |          |      |         | 100.00 |      | 100.00 |                  |     |  |

Electron Image 8

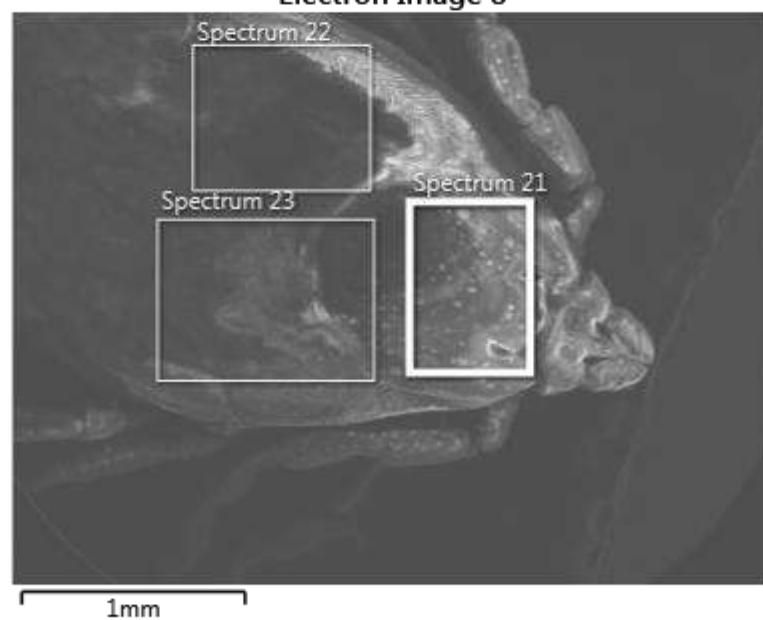

22/01/2020 12:03:39

Project 1

Rumania 7

Dorso 1 15 Kv

Electron Image 8

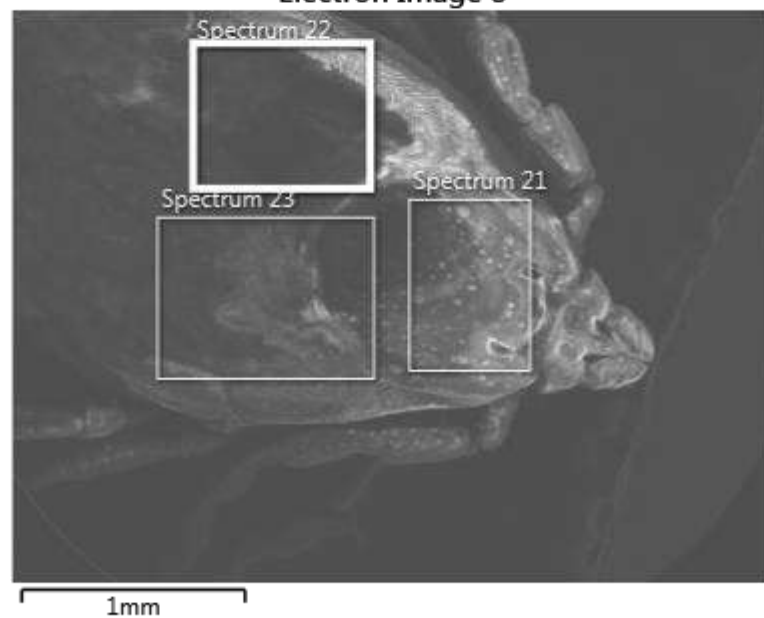



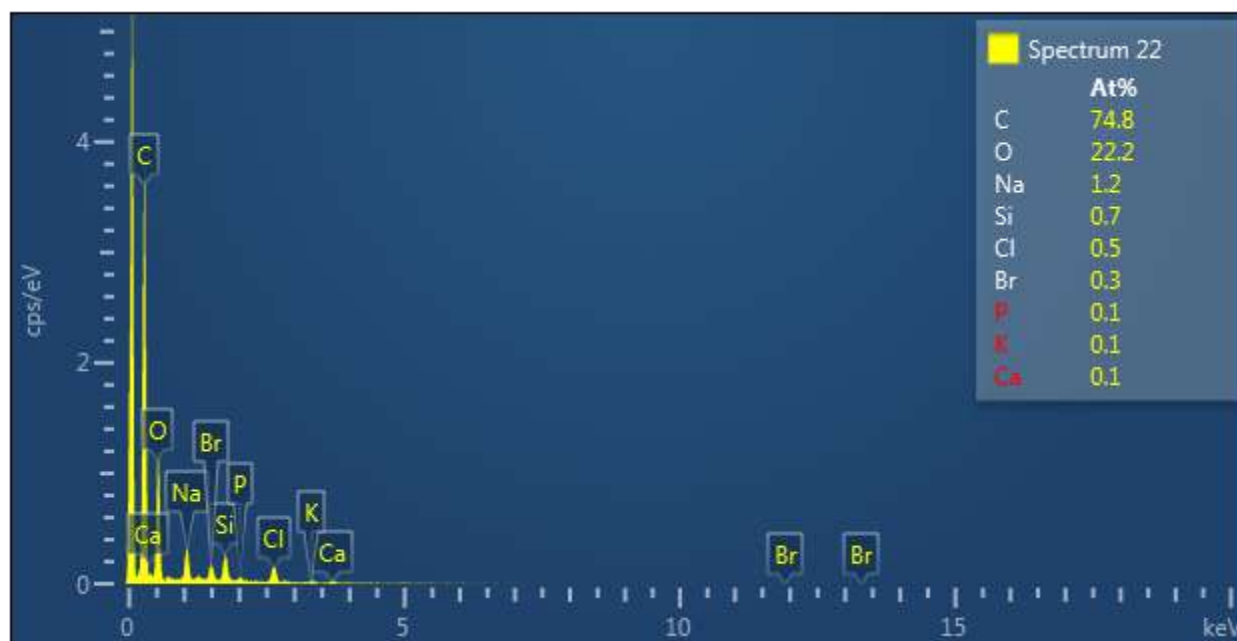

|                                 |                     |
|---------------------------------|---------------------|
| Label:                          | Spectrum 22         |
| Source:                         | Acquired            |
| Created:                        | 22/01/2020 12:03:39 |
| Livetime:                       | 60.1s               |
| Process Time:                   | 4                   |
| Accelerating Voltage:           | 15.00kV             |
| Magnification:                  | 33 x                |
| Working Distance:               | 10.0mm              |
| Specimen Tilt (degrees):        | 0.0                 |
| Elevation (degrees):            | 35.0                |
| Azimuth (degrees):              | 0.0                 |
| Number Of Channels:             | 2048                |
| Energy Range (keV):             | 20 keV              |
| Energy per Channel (eV):        | 10.0eV              |
| Detector Type Id:               | 29                  |
| Detector Type:                  | X-Max               |
| Window Type:                    | SATW                |
| Pulse Pile Up Correction:       | Succeeded           |
| Primary Detector:               | 2617                |
| Primary Detector Serial Number: | 77871-X080          |

| Element | Line Type | Apparent Concentration | k Ratio | Wt%   | Wt% Sigma | Atomic % | Standard Label | Factory Standard | Standard Calibration Date |
|---------|-----------|------------------------|---------|-------|-----------|----------|----------------|------------------|---------------------------|
| C       | K series  | 6.81                   | 0.06806 | 66.46 | 0.68      | 74.78    | C Vit          | Yes              |                           |
| O       | K series  | 3.35                   | 0.01128 | 26.33 | 0.63      | 22.24    | SiO2           | Yes              |                           |
| Na      | K         | 0.51                   | 0.0021  | 2.09  | 0.12      | 1.23     | Albite         | Yes              |                           |

|        |          |      |         |        |      |        |                  |     |  |
|--------|----------|------|---------|--------|------|--------|------------------|-----|--|
|        | series   |      | 4       |        |      |        |                  |     |  |
| Si     | K series | 0.28 | 0.00223 | 1.40   | 0.08 | 0.67   | SiO <sub>2</sub> | Yes |  |
| P      | K series | 0.07 | 0.00038 | 0.24   | 0.06 | 0.10   | GaP              | Yes |  |
| Cl     | K series | 0.26 | 0.00229 | 1.38   | 0.09 | 0.53   | NaCl             | Yes |  |
| K      | K series | 0.05 | 0.00044 | 0.26   | 0.06 | 0.09   | KBr              | Yes |  |
| Ca     | K series | 0.05 | 0.00042 | 0.25   | 0.06 | 0.08   | Wollastonite     | Yes |  |
| Br     | L series | 0.25 | 0.00227 | 1.60   | 0.15 | 0.27   | KBr              | Yes |  |
| Total: |          |      |         | 100.00 |      | 100.00 |                  |     |  |

Electron Image 8

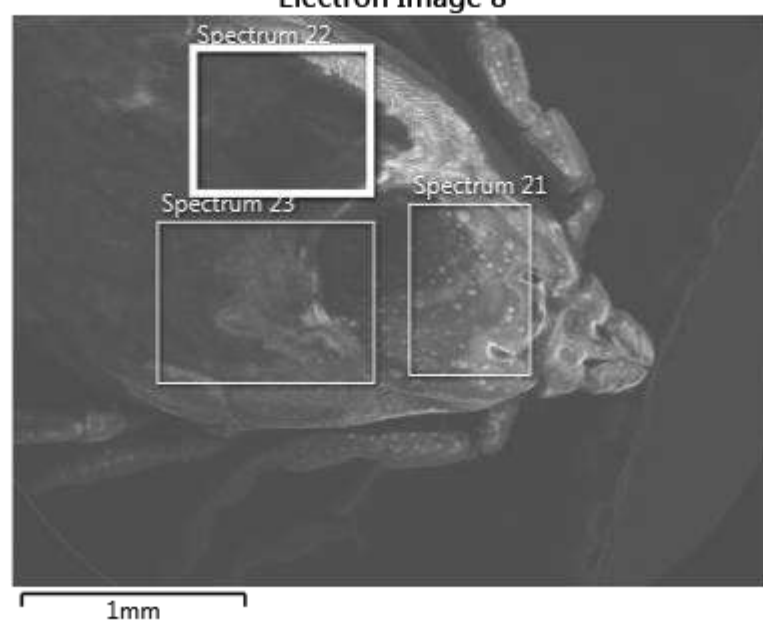

22/01/2020 12:04:46

Project 1

Rumania 7

Dorso 1 15 Kv

Electron Image 8

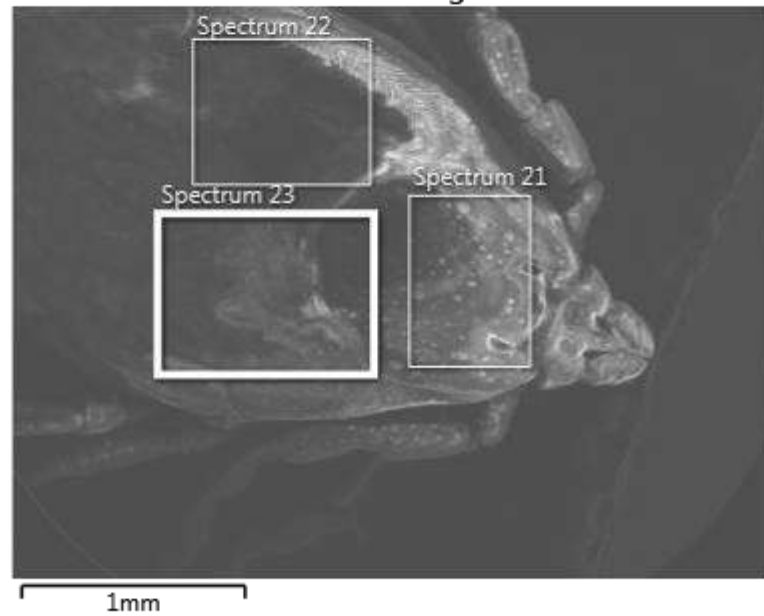

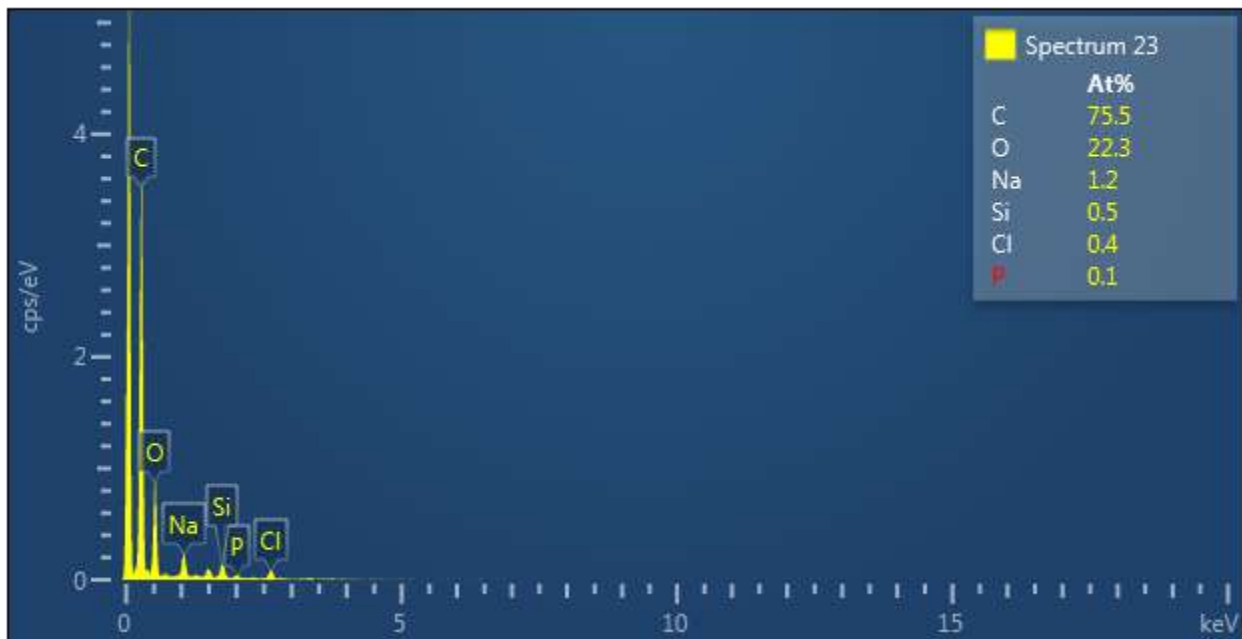

|                                 |                     |
|---------------------------------|---------------------|
| Label:                          | Spectrum 23         |
| Source:                         | Acquired            |
| Created:                        | 22/01/2020 12:04:46 |
| Livetime:                       | 60.5s               |
| Process Time:                   | 4                   |
| Accelerating Voltage:           | 15.00kV             |
| Magnification:                  | 33 x                |
| Working Distance:               | 10.0mm              |
| Specimen Tilt (degrees):        | 0.0                 |
| Elevation (degrees):            | 35.0                |
| Azimuth (degrees):              | 0.0                 |
| Number Of Channels:             | 2048                |
| Energy Range (keV):             | 20 keV              |
| Energy per Channel (eV):        | 10.0eV              |
| Detector Type Id:               | 29                  |
| Detector Type:                  | X-Max               |
| Window Type:                    | SATW                |
| Pulse Pile Up Correction:       | Succeeded           |
| Primary Detector:               | 2617                |
| Primary Detector Serial Number: | 77871-X080          |

| Element | Line Type | Apparent Concentration | k Ratio | Wt%   | Wt% Sigma | Atomic % | Standard Label | Factory Standard | Standard Calibration Date |
|---------|-----------|------------------------|---------|-------|-----------|----------|----------------|------------------|---------------------------|
| C       | K series  | 5.78                   | 0.05777 | 68.59 | 0.65      | 75.51    | C Vit          | Yes              |                           |
| O       | K series  | 2.45                   | 0.00824 | 26.97 | 0.65      | 22.29    | SiO2           | Yes              |                           |
| Na      | K         | 0.36                   | 0.0015  | 2.08  | 0.14      | 1.20     | Albite         | Yes              |                           |

|        |          |      |         |        |      |        |                  |     |  |
|--------|----------|------|---------|--------|------|--------|------------------|-----|--|
|        | series   |      | 1       |        |      |        |                  |     |  |
| Si     | K series | 0.16 | 0.00124 | 1.08   | 0.09 | 0.51   | SiO <sub>2</sub> | Yes |  |
| P      | K series | 0.06 | 0.00033 | 0.28   | 0.06 | 0.12   | GaP              | Yes |  |
| Cl     | K series | 0.13 | 0.00117 | 0.99   | 0.09 | 0.37   | NaCl             | Yes |  |
| Total: |          |      |         | 100.00 |      | 100.00 |                  |     |  |

Electron Image 8

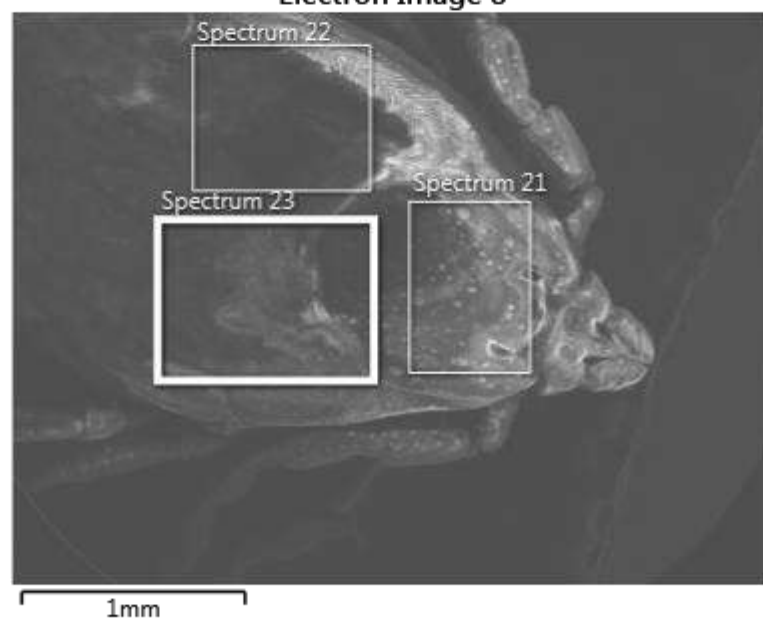

22/01/2020 12:06:47

Project 1

Rumania 7

Dorso 2 15 Kv

Electron Image 9

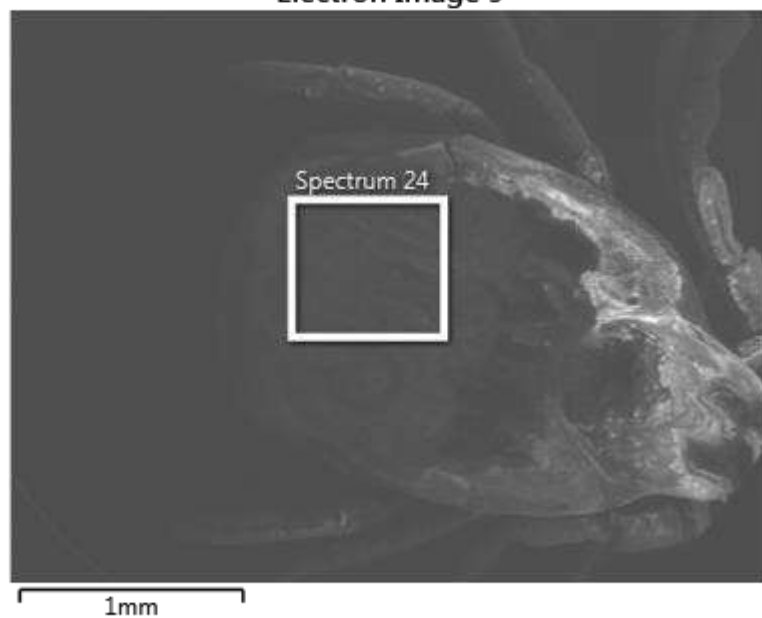

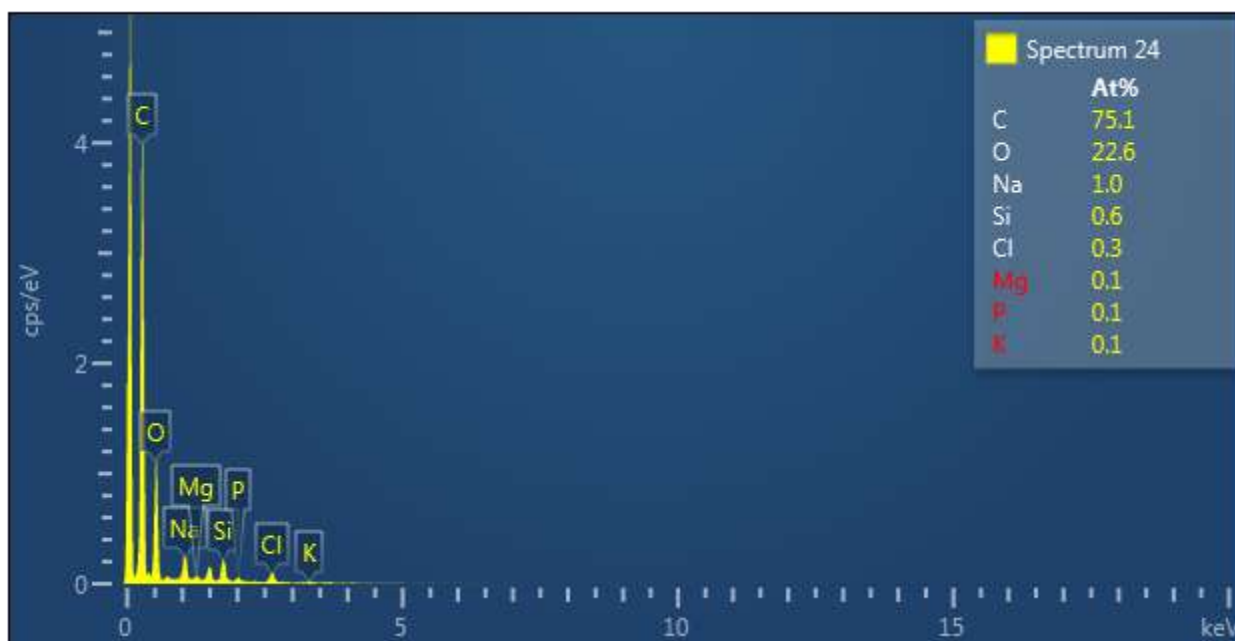

|                                 |                     |
|---------------------------------|---------------------|
| Label:                          | Spectrum 24         |
| Source:                         | Acquired            |
| Created:                        | 22/01/2020 12:06:47 |
| Livetime:                       | 60.5s               |
| Process Time:                   | 4                   |
| Accelerating Voltage:           | 15.00kV             |
| Magnification:                  | 33 x                |
| Working Distance:               | 10.0mm              |
| Specimen Tilt (degrees):        | 0.0                 |
| Elevation (degrees):            | 35.0                |
| Azimuth (degrees):              | 0.0                 |
| Number Of Channels:             | 2048                |
| Energy Range (keV):             | 20 keV              |
| Energy per Channel (eV):        | 10.0eV              |
| Detector Type Id:               | 29                  |
| Detector Type:                  | X-Max               |
| Window Type:                    | SATW                |
| Pulse Pile Up Correction:       | Succeeded           |
| Primary Detector:               | 2617                |
| Primary Detector Serial Number: | 77871-X080          |

| Element | Line Type | Apparent Concentration | k Ratio | Wt%   | Wt% Sigma | Atomic % | Standard Label | Factory Standard | Standard Calibration Date |
|---------|-----------|------------------------|---------|-------|-----------|----------|----------------|------------------|---------------------------|
| C       | K series  | 7.34                   | 0.07340 | 68.00 | 0.66      | 75.07    | C Vit          | Yes              |                           |
| O       | K series  | 3.21                   | 0.01082 | 27.32 | 0.63      | 22.64    | SiO2           | Yes              |                           |
| Na      | K         | 0.39                   | 0.0016  | 1.74  | 0.12      | 1.00     | Albite         | Yes              |                           |

|        |          |      |         |        |      |        |                  |     |  |
|--------|----------|------|---------|--------|------|--------|------------------|-----|--|
|        | series   |      | 3       |        |      |        |                  |     |  |
| Mg     | K series | 0.05 | 0.00031 | 0.27   | 0.06 | 0.15   | MgO              | Yes |  |
| Si     | K series | 0.26 | 0.00202 | 1.37   | 0.08 | 0.65   | SiO <sub>2</sub> | Yes |  |
| P      | K series | 0.07 | 0.00039 | 0.26   | 0.06 | 0.11   | GaP              | Yes |  |
| Cl     | K series | 0.15 | 0.00132 | 0.86   | 0.08 | 0.32   | NaCl             | Yes |  |
| K      | K series | 0.03 | 0.00029 | 0.19   | 0.06 | 0.06   | KBr              | Yes |  |
| Total: |          |      |         | 100.00 |      | 100.00 |                  |     |  |

Electron Image 9

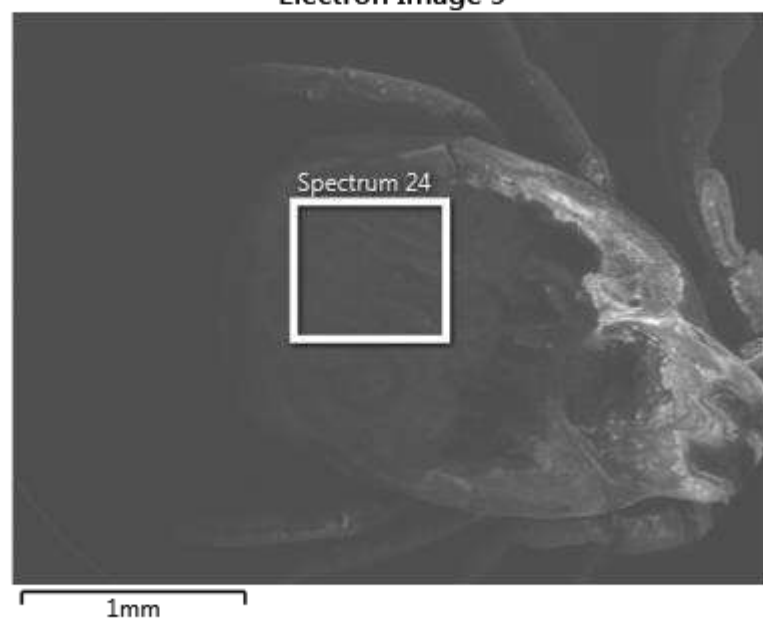



22/01/2020 12:10:01

Project 1

Rumania 8

Dorso 1 15 Kv

Electron Image 10

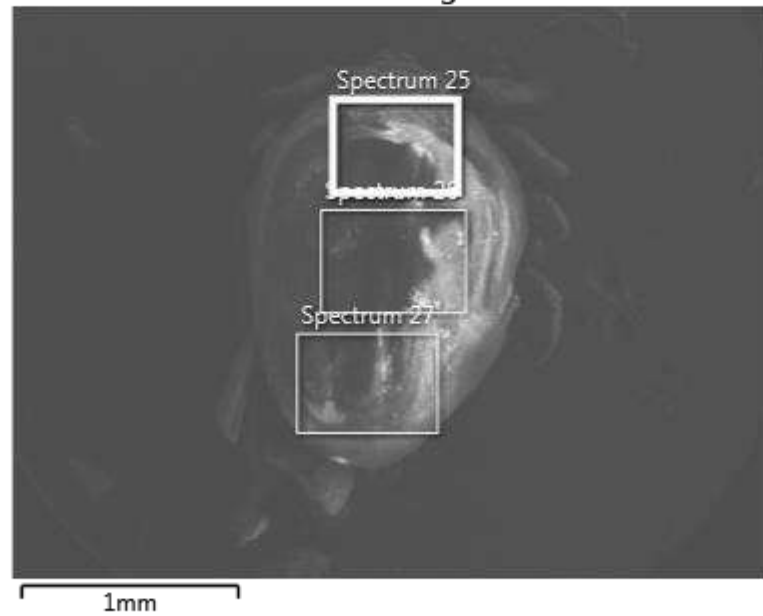

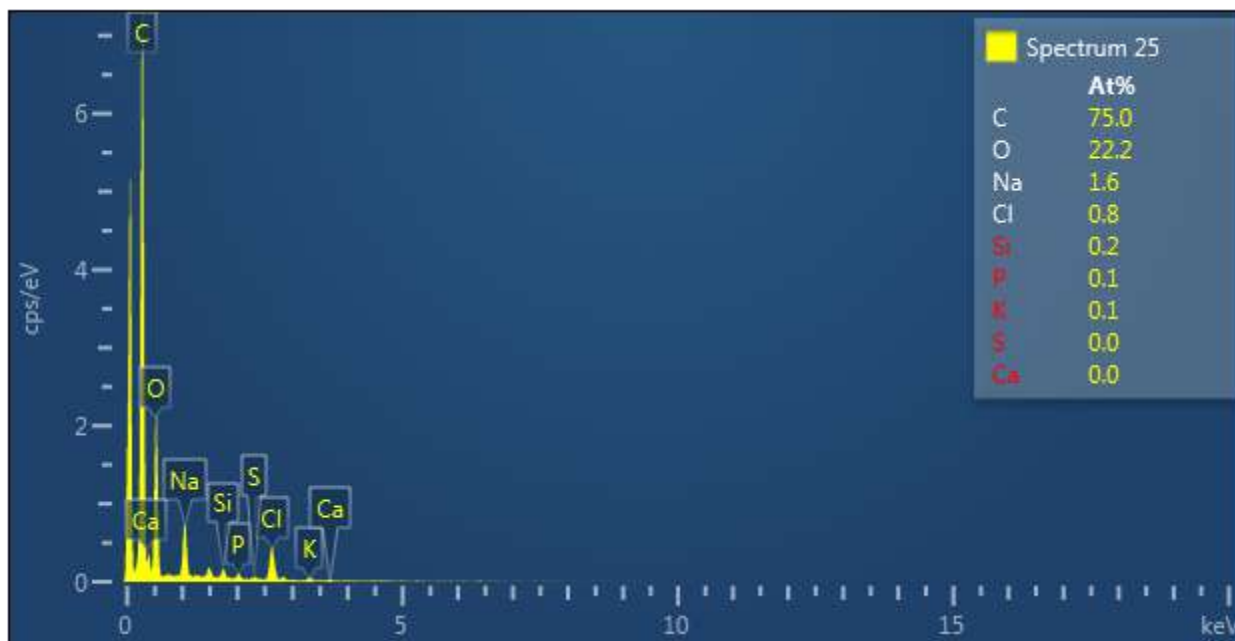

|                                 |                     |
|---------------------------------|---------------------|
| Label:                          | Spectrum 25         |
| Source:                         | Acquired            |
| Created:                        | 22/01/2020 12:10:01 |
| Livetime:                       | 60.6s               |
| Process Time:                   | 4                   |
| Accelerating Voltage:           | 15.00kV             |
| Magnification:                  | 32 x                |
| Working Distance:               | 10.0mm              |
| Specimen Tilt (degrees):        | 0.0                 |
| Elevation (degrees):            | 35.0                |
| Azimuth (degrees):              | 0.0                 |
| Number Of Channels:             | 2048                |
| Energy Range (keV):             | 20 keV              |
| Energy per Channel (eV):        | 10.0eV              |
| Detector Type Id:               | 29                  |
| Detector Type:                  | X-Max               |
| Window Type:                    | SATW                |
| Pulse Pile Up Correction:       | Succeeded           |
| Primary Detector:               | 2617                |
| Primary Detector Serial Number: | 77871-X080          |

| Element | Line Type | Apparent Concentration | k Ratio | Wt%   | Wt% Sigma | Atomic % | Standard Label | Factory Standard | Standard Calibration Date |
|---------|-----------|------------------------|---------|-------|-----------|----------|----------------|------------------|---------------------------|
| C       | K series  | 13.37                  | 0.13366 | 67.52 | 0.49      | 75.03    | C Vit          | Yes              |                           |
| O       | K series  | 6.23                   | 0.02097 | 26.56 | 0.46      | 22.16    | SiO2           | Yes              |                           |
| Na      | K         | 1.21                   | 0.0051  | 2.69  | 0.09      | 1.56     | Albite         | Yes              |                           |

|        |          |      |         |        |      |        |                  |     |  |
|--------|----------|------|---------|--------|------|--------|------------------|-----|--|
|        | series   |      | 0       |        |      |        |                  |     |  |
| Si     | K series | 0.14 | 0.00110 | 0.37   | 0.04 | 0.18   | SiO <sub>2</sub> | Yes |  |
| P      | K series | 0.13 | 0.00075 | 0.25   | 0.04 | 0.11   | GaP              | Yes |  |
| S      | K series | 0.04 | 0.00036 | 0.11   | 0.03 | 0.05   | FeS <sub>2</sub> | Yes |  |
| Cl     | K series | 0.75 | 0.00657 | 2.12   | 0.08 | 0.80   | NaCl             | Yes |  |
| K      | K series | 0.09 | 0.00079 | 0.25   | 0.04 | 0.09   | KBr              | Yes |  |
| Ca     | K series | 0.04 | 0.00036 | 0.11   | 0.04 | 0.04   | Wollastonite     | Yes |  |
| Total: |          |      |         | 100.00 |      | 100.00 |                  |     |  |

Electron Image 10

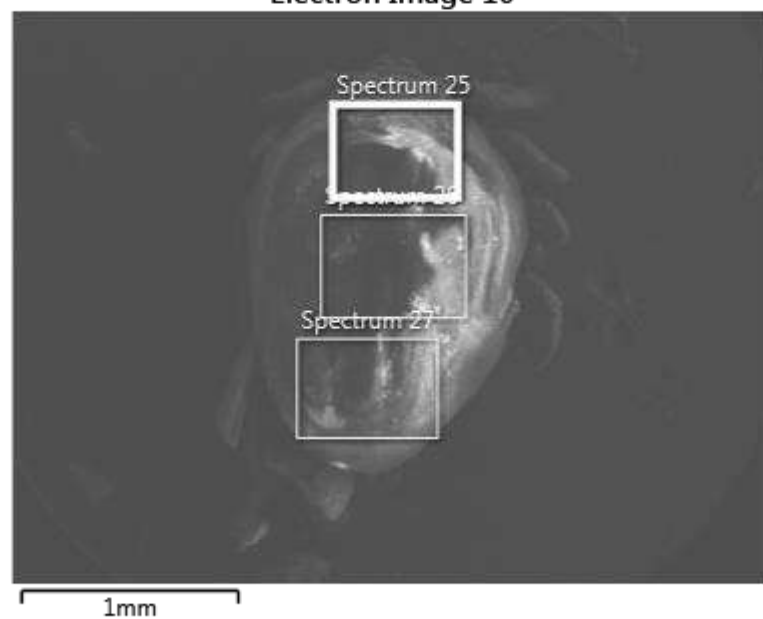

22/01/2020 12:11:11

Project 1

Rumania 8

Dorso 1 15 Kv

Electron Image 10

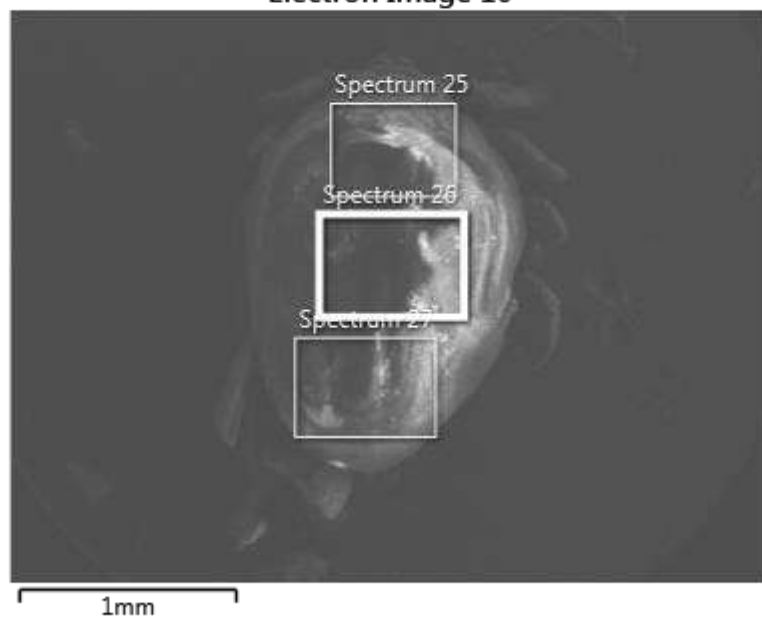

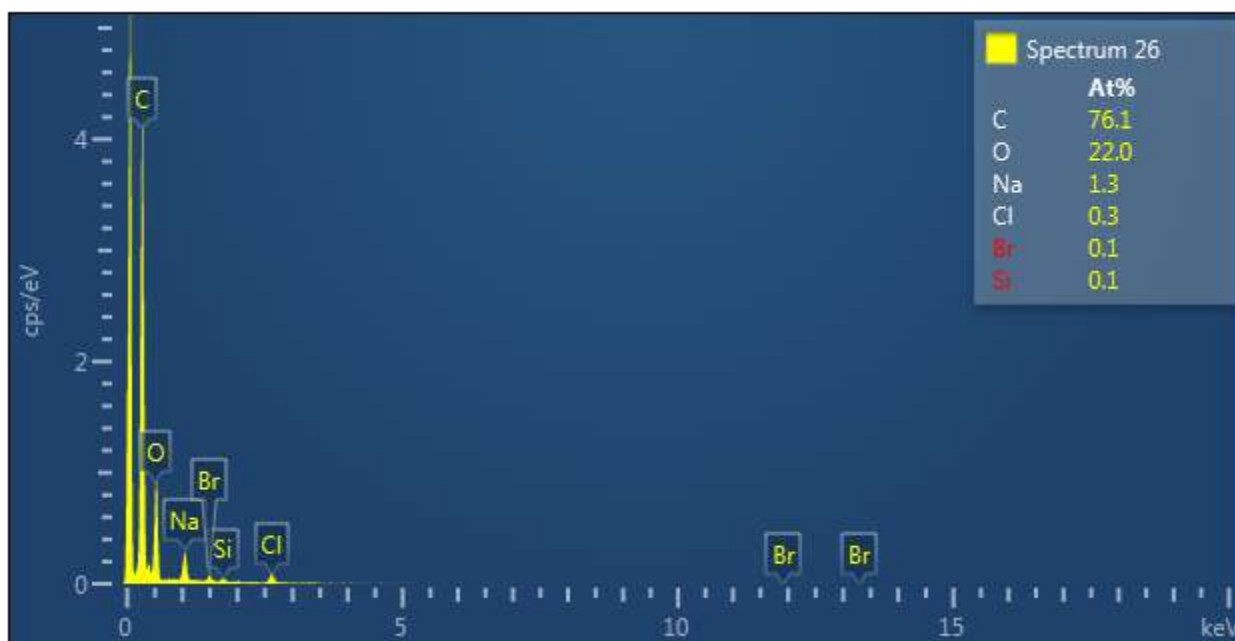

|                                 |                     |
|---------------------------------|---------------------|
| Label:                          | Spectrum 26         |
| Source:                         | Acquired            |
| Created:                        | 22/01/2020 12:11:11 |
| Livetime:                       | 60.4s               |
| Process Time:                   | 4                   |
| Accelerating Voltage:           | 15.00kV             |
| Magnification:                  | 32 x                |
| Working Distance:               | 10.0mm              |
| Specimen Tilt (degrees):        | 0.0                 |
| Elevation (degrees):            | 35.0                |
| Azimuth (degrees):              | 0.0                 |
| Number Of Channels:             | 2048                |
| Energy Range (keV):             | 20 keV              |
| Energy per Channel (eV):        | 10.0eV              |
| Detector Type Id:               | 29                  |
| Detector Type:                  | X-Max               |
| Window Type:                    | SATW                |
| Pulse Pile Up Correction:       | Succeeded           |
| Primary Detector:               | 2617                |
| Primary Detector Serial Number: | 77871-X080          |

| Element | Line Type | Apparent Concentration | k Ratio | Wt%   | Wt% Sigma | Atomic % | Standard Label | Factory Standard | Standard Calibration Date |
|---------|-----------|------------------------|---------|-------|-----------|----------|----------------|------------------|---------------------------|
| C       | K series  | 6.68                   | 0.06677 | 69.25 | 0.64      | 76.14    | C Vit          | Yes              |                           |
| O       | K series  | 2.63                   | 0.00883 | 26.62 | 0.63      | 21.97    | SiO2           | Yes              |                           |
| Na      | K         | 0.44                   | 0.0018  | 2.34  | 0.14      | 1.34     | Albite         | Yes              |                           |

|        |          |      |         |        |      |        |                  |     |  |
|--------|----------|------|---------|--------|------|--------|------------------|-----|--|
|        | series   |      | 6       |        |      |        |                  |     |  |
| Si     | K series | 0.03 | 0.00026 | 0.21   | 0.05 | 0.10   | SiO <sub>2</sub> | Yes |  |
| Cl     | K series | 0.13 | 0.00113 | 0.87   | 0.08 | 0.32   | NaCl             | Yes |  |
| Br     | L series | 0.09 | 0.00078 | 0.71   | 0.13 | 0.12   | KBr              | Yes |  |
| Total: |          |      |         | 100.00 |      | 100.00 |                  |     |  |

Electron Image 10

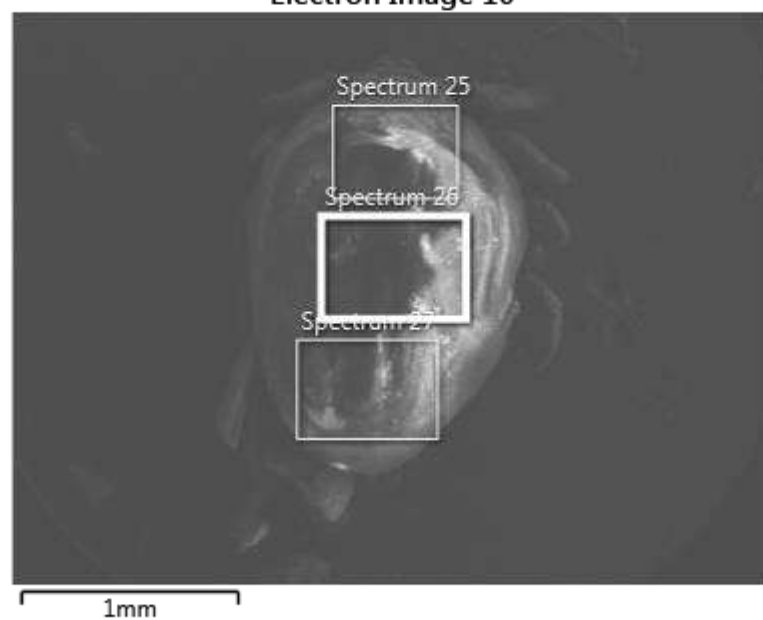

22/01/2020 12:12:21

Project 1

Rumania 8

Dorso 1 15 Kv

Electron Image 10

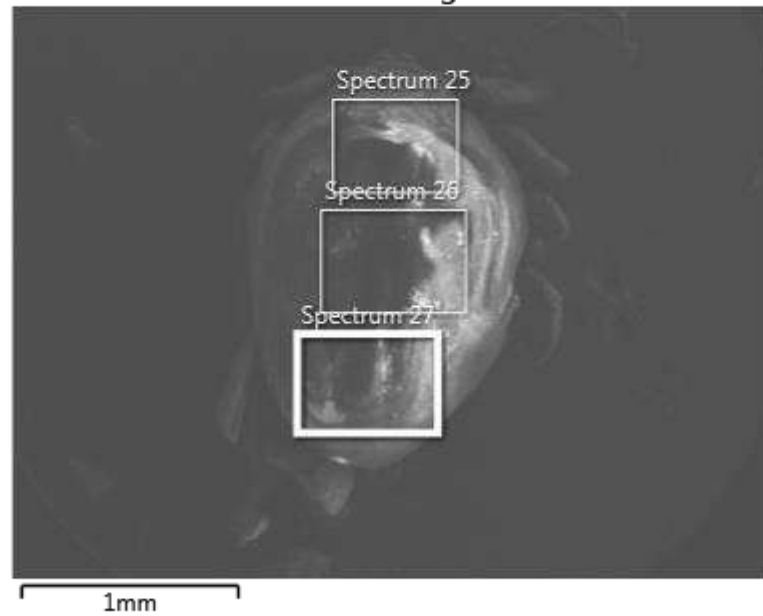

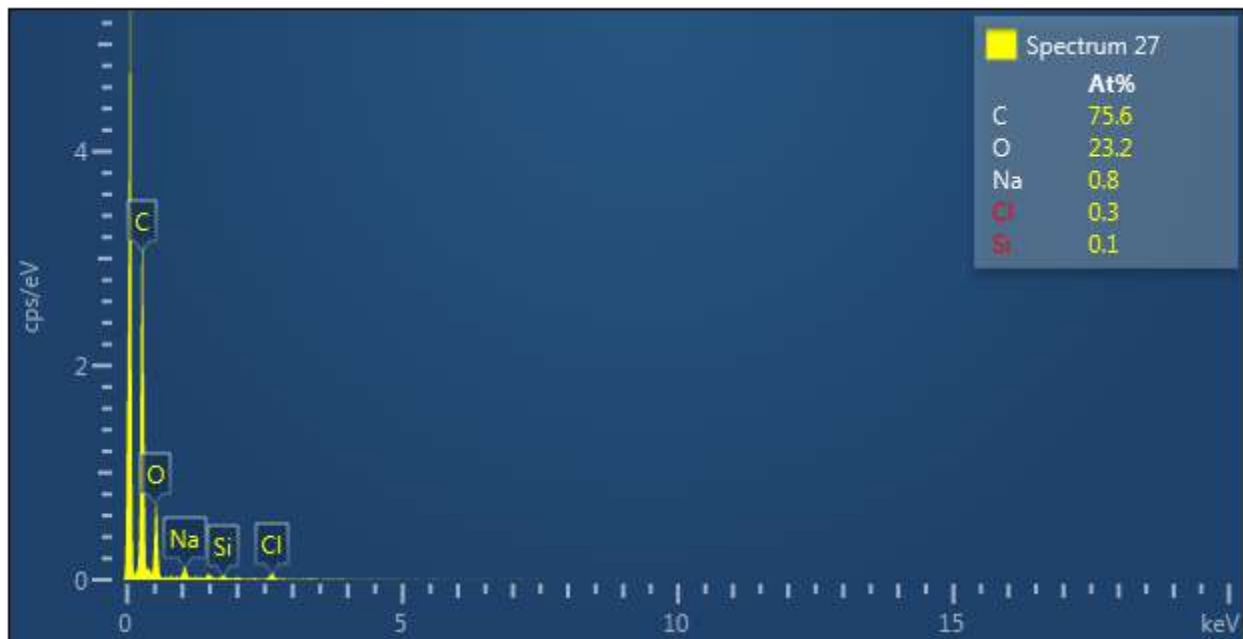

|                                 |                     |
|---------------------------------|---------------------|
| Label:                          | Spectrum 27         |
| Source:                         | Acquired            |
| Created:                        | 22/01/2020 12:12:21 |
| Livetime:                       | 60.1s               |
| Process Time:                   | 4                   |
| Accelerating Voltage:           | 15.00kV             |
| Magnification:                  | 32 x                |
| Working Distance:               | 10.0mm              |
| Specimen Tilt (degrees):        | 0.0                 |
| Elevation (degrees):            | 35.0                |
| Azimuth (degrees):              | 0.0                 |
| Number Of Channels:             | 2048                |
| Energy Range (keV):             | 20 keV              |
| Energy per Channel (eV):        | 10.0eV              |
| Detector Type Id:               | 29                  |
| Detector Type:                  | X-Max               |
| Window Type:                    | SATW                |
| Pulse Pile Up Correction:       | Succeeded           |
| Primary Detector:               | 2617                |
| Primary Detector Serial Number: | 77871-X080          |

| Element | Line Type | Apparent Concentration | k Ratio | Wt%   | Wt% Sigma | Atomic % | Standard Label | Factory Standard | Standard Calibration Date |
|---------|-----------|------------------------|---------|-------|-----------|----------|----------------|------------------|---------------------------|
| C       | K series  | 5.12                   | 0.05117 | 69.31 | 0.74      | 75.65    | C Vit          | Yes              |                           |
| O       | K series  | 2.02                   | 0.00681 | 28.26 | 0.74      | 23.15    | SiO2           | Yes              |                           |
| Na      | K         | 0.18                   | 0.0007  | 1.32  | 0.13      | 0.75     | Albite         | Yes              |                           |



|        |          |      |         |        |      |        |                  |     |  |
|--------|----------|------|---------|--------|------|--------|------------------|-----|--|
|        | series   |      | 4       |        |      |        |                  |     |  |
| Si     | K series | 0.03 | 0.00028 | 0.30   | 0.07 | 0.14   | SiO <sub>2</sub> | Yes |  |
| Cl     | K series | 0.09 | 0.00077 | 0.82   | 0.10 | 0.30   | NaCl             | Yes |  |
| Total: |          |      |         | 100.00 |      | 100.00 |                  |     |  |

Electron Image 10

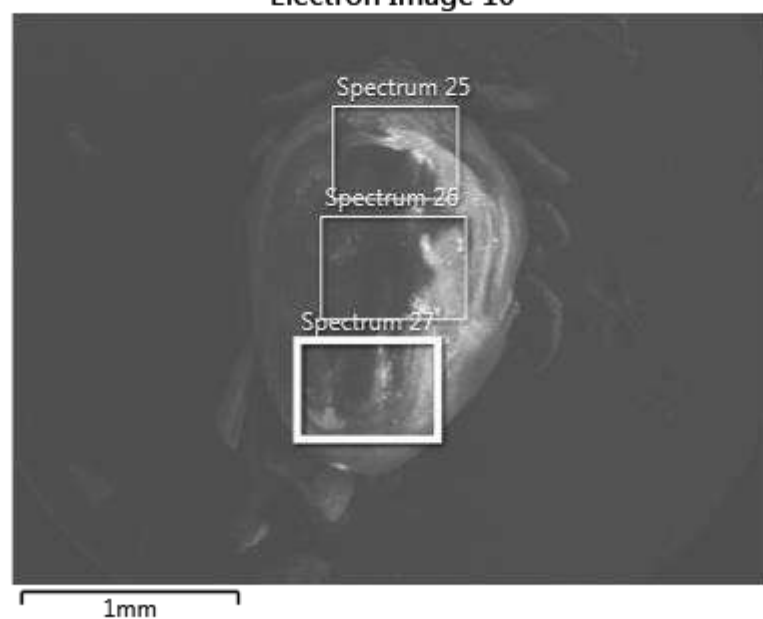

22/01/2020 12:21:52

Project 1

Rumania 9

Dorso 1 15 Kv

Electron Image 11

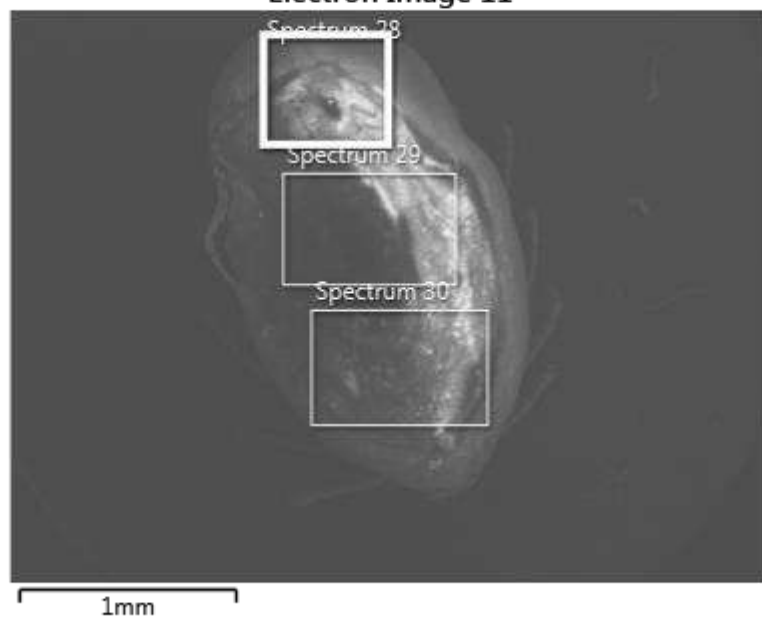

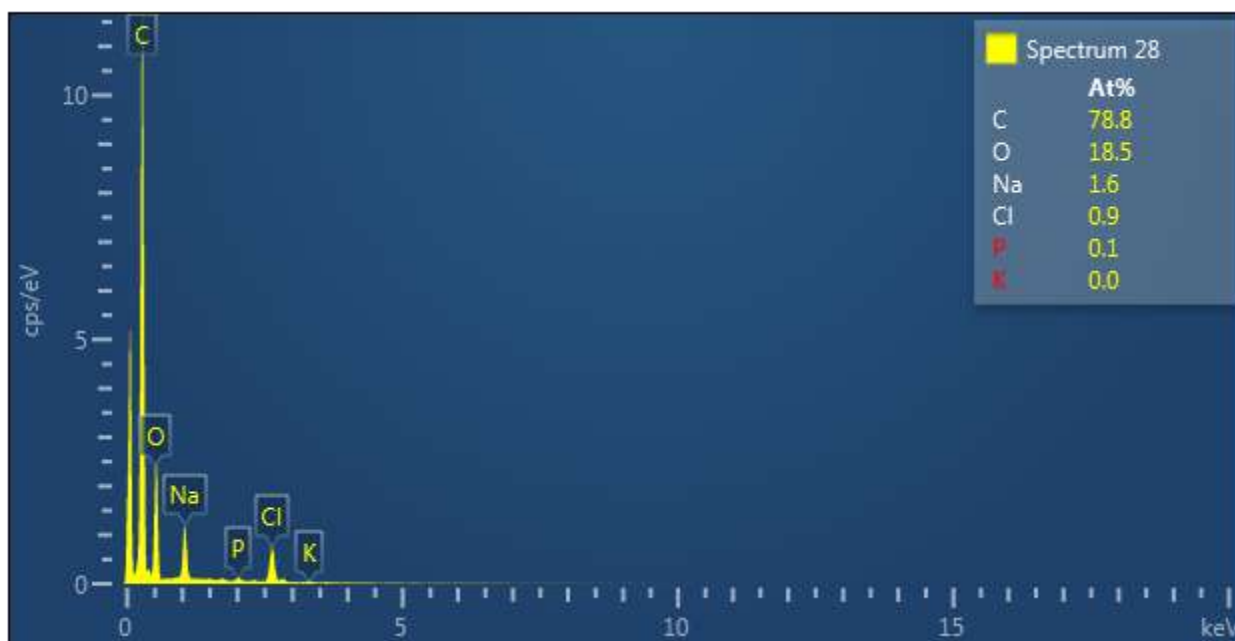

|                                 |                     |
|---------------------------------|---------------------|
| Label:                          | Spectrum 28         |
| Source:                         | Acquired            |
| Created:                        | 22/01/2020 12:21:52 |
| Livetime:                       | 60.5s               |
| Process Time:                   | 4                   |
| Accelerating Voltage:           | 15.00kV             |
| Magnification:                  | 32 x                |
| Working Distance:               | 10.0mm              |
| Specimen Tilt (degrees):        | 0.0                 |
| Elevation (degrees):            | 35.0                |
| Azimuth (degrees):              | 0.0                 |
| Number Of Channels:             | 2048                |
| Energy Range (keV):             | 20 keV              |
| Energy per Channel (eV):        | 10.0eV              |
| Detector Type Id:               | 29                  |
| Detector Type:                  | X-Max               |
| Window Type:                    | SATW                |
| Pulse Pile Up Correction:       | Succeeded           |
| Primary Detector:               | 2617                |
| Primary Detector Serial Number: | 77871-X080          |

| Element | Line Type | Apparent Concentration | k Ratio | Wt%   | Wt% Sigma | Atomic % | Standard Label | Factory Standard | Standard Calibration Date |
|---------|-----------|------------------------|---------|-------|-----------|----------|----------------|------------------|---------------------------|
| C       | K series  | 20.86                  | 0.20861 | 71.85 | 0.38      | 78.80    | C Vit          | Yes              |                           |
| O       | K series  | 7.14                   | 0.02403 | 22.49 | 0.36      | 18.51    | SiO2           | Yes              |                           |
| Na      | K         | 1.87                   | 0.0078  | 2.85  | 0.08      | 1.63     | Albite         | Yes              |                           |

|        |          |      |         |        |      |        |      |     |  |
|--------|----------|------|---------|--------|------|--------|------|-----|--|
|        | series   |      | 7       |        |      |        |      |     |  |
| P      | K series | 0.16 | 0.00088 | 0.20   | 0.03 | 0.09   | GaP  | Yes |  |
| Cl     | K series | 1.27 | 0.01112 | 2.50   | 0.07 | 0.93   | NaCl | Yes |  |
| K      | K series | 0.06 | 0.00051 | 0.11   | 0.03 | 0.04   | KBr  | Yes |  |
| Total: |          |      |         | 100.00 |      | 100.00 |      |     |  |

Electron Image 11

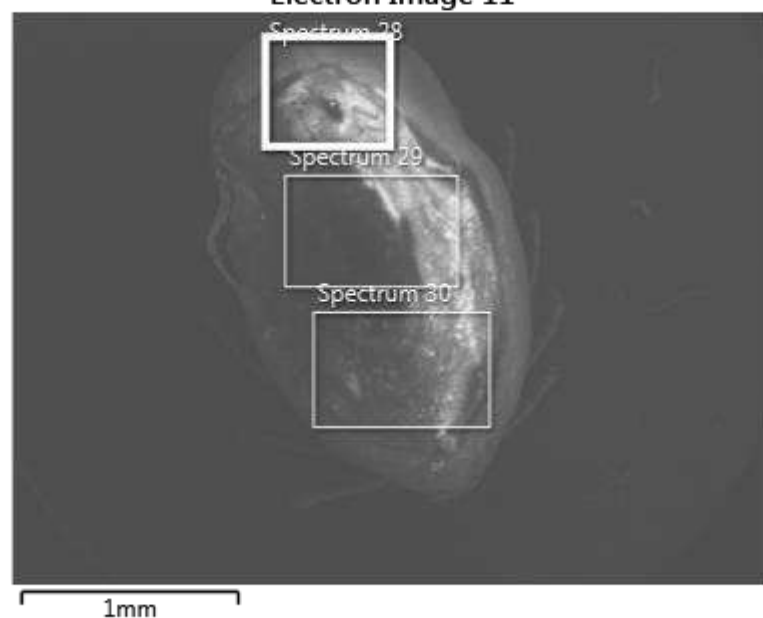

22/01/2020 12:23:03

Project 1

Rumania 9

Dorso 1 15 Kv

Electron Image 11

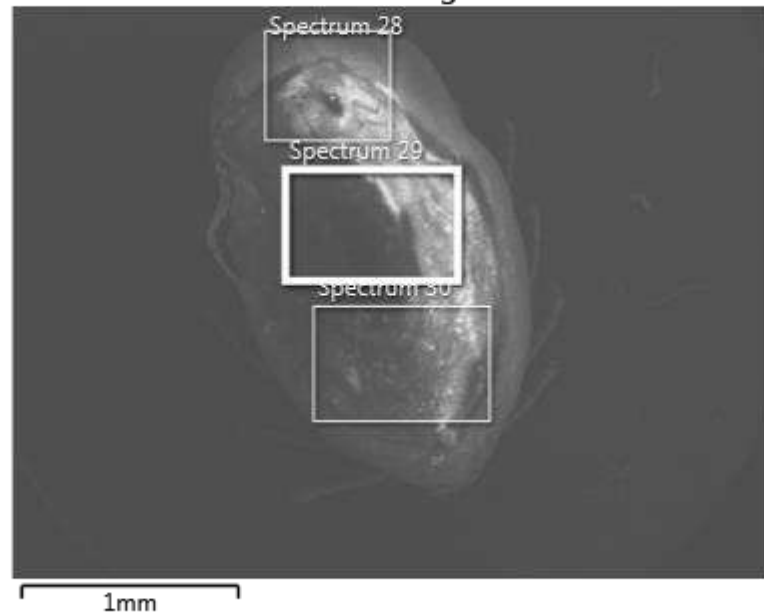

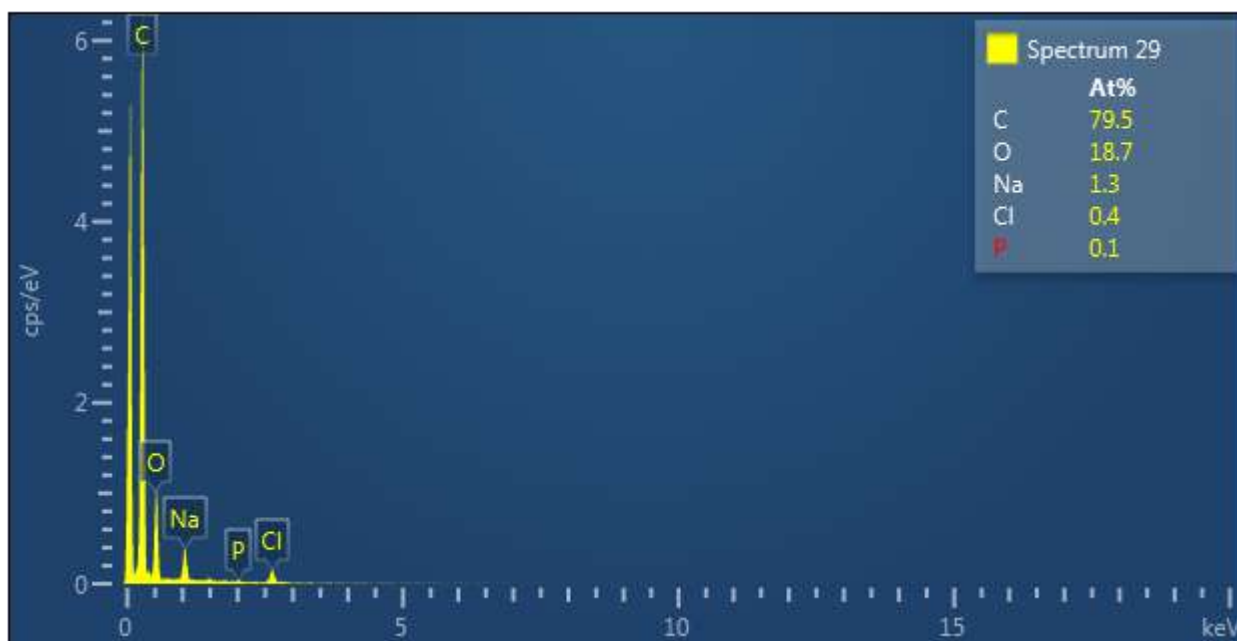

|                                 |                     |
|---------------------------------|---------------------|
| Label:                          | Spectrum 29         |
| Source:                         | Acquired            |
| Created:                        | 22/01/2020 12:23:03 |
| Livetime:                       | 60.5s               |
| Process Time:                   | 4                   |
| Accelerating Voltage:           | 15.00kV             |
| Magnification:                  | 32 x                |
| Working Distance:               | 10.0mm              |
| Specimen Tilt (degrees):        | 0.0                 |
| Elevation (degrees):            | 35.0                |
| Azimuth (degrees):              | 0.0                 |
| Number Of Channels:             | 2048                |
| Energy Range (keV):             | 20 keV              |
| Energy per Channel (eV):        | 10.0eV              |
| Detector Type Id:               | 29                  |
| Detector Type:                  | X-Max               |
| Window Type:                    | SATW                |
| Pulse Pile Up Correction:       | Succeeded           |
| Primary Detector:               | 2617                |
| Primary Detector Serial Number: | 77871-X080          |

| Element | Line Type | Apparent Concentration | k Ratio | Wt%   | Wt% Sigma | Atomic % | Standard Label | Factory Standard | Standard Calibration Date |
|---------|-----------|------------------------|---------|-------|-----------|----------|----------------|------------------|---------------------------|
| C       | K series  | 10.01                  | 0.10015 | 73.42 | 0.53      | 79.52    | C Vit          | Yes              |                           |
| O       | K series  | 2.90                   | 0.00977 | 23.02 | 0.53      | 18.72    | SiO2           | Yes              |                           |
| Na      | K         | 0.58                   | 0.0024  | 2.26  | 0.11      | 1.28     | Albite         | Yes              |                           |

|        |          |      |         |        |      |        |      |     |  |
|--------|----------|------|---------|--------|------|--------|------|-----|--|
|        | series   |      | 6       |        |      |        |      |     |  |
| P      | K series | 0.04 | 0.00023 | 0.14   | 0.04 | 0.06   | GaP  | Yes |  |
| Cl     | K series | 0.23 | 0.00204 | 1.16   | 0.08 | 0.42   | NaCl | Yes |  |
| Total: |          |      |         | 100.00 |      | 100.00 |      |     |  |

Electron Image 11

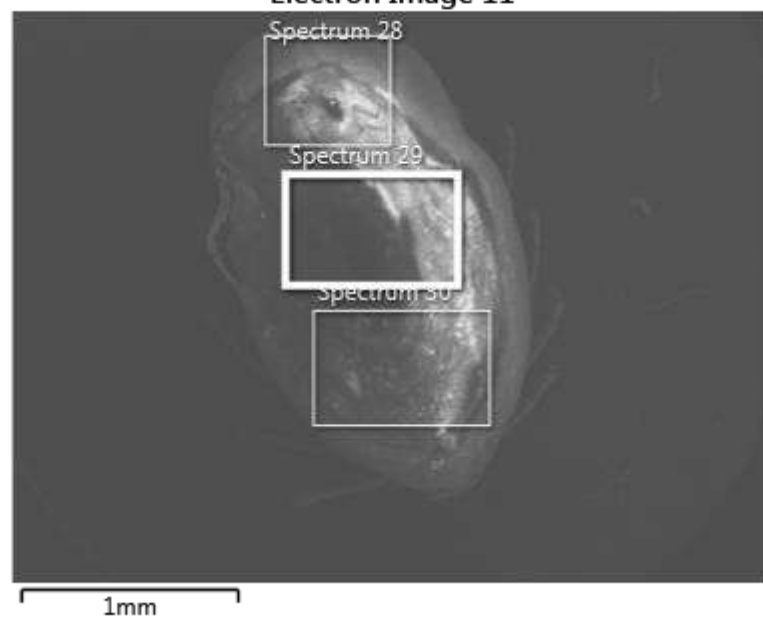

22/01/2020 12:24:12

Project 1

Rumania 9

Dorso 1 15 Kv

Electron Image 11

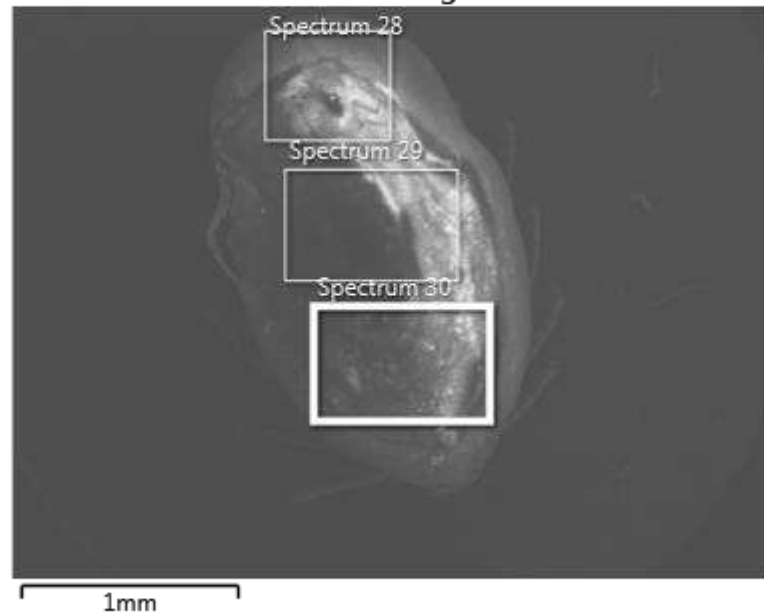



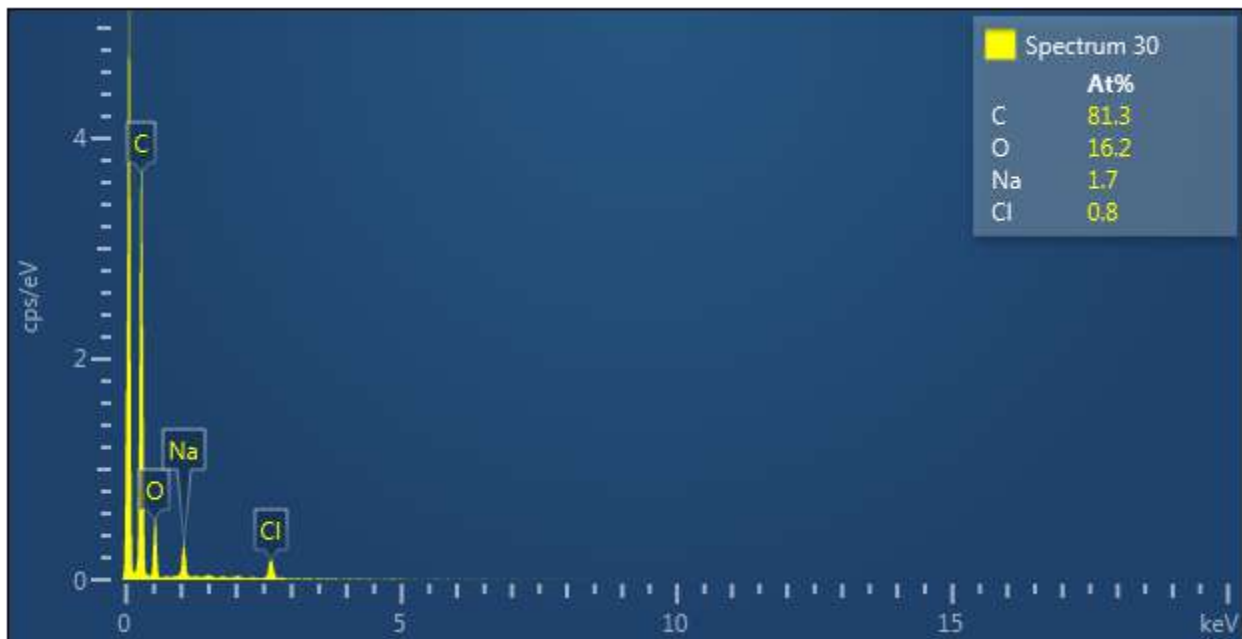

|                                 |                     |
|---------------------------------|---------------------|
| Label:                          | Spectrum 30         |
| Source:                         | Acquired            |
| Created:                        | 22/01/2020 12:24:12 |
| Livetime:                       | 60.1s               |
| Process Time:                   | 4                   |
| Accelerating Voltage:           | 15.00kV             |
| Magnification:                  | 32 x                |
| Working Distance:               | 10.0mm              |
| Specimen Tilt (degrees):        | 0.0                 |
| Elevation (degrees):            | 35.0                |
| Azimuth (degrees):              | 0.0                 |
| Number Of Channels:             | 2048                |
| Energy Range (keV):             | 20 keV              |
| Energy per Channel (eV):        | 10.0eV              |
| Detector Type Id:               | 29                  |
| Detector Type:                  | X-Max               |
| Window Type:                    | SATW                |
| Pulse Pile Up Correction:       | Succeeded           |
| Primary Detector:               | 2617                |
| Primary Detector Serial Number: | 77871-X080          |

| Element | Line Type | Apparent Concentration | k Ratio | Wt%   | Wt% Sigma | Atomic % | Standard Label | Factory Standard | Standard Calibration Date |
|---------|-----------|------------------------|---------|-------|-----------|----------|----------------|------------------|---------------------------|
| C       | K series  | 6.19                   | 0.06193 | 74.94 | 0.61      | 81.33    | C Vit          | Yes              |                           |
| O       | K series  | 1.63                   | 0.00549 | 19.83 | 0.60      | 16.15    | SiO2           | Yes              |                           |
| Na      | K         | 0.53                   | 0.0022  | 2.99  | 0.15      | 1.69     | Albite         | Yes              |                           |

|        |          |      |         |        |      |        |      |     |  |
|--------|----------|------|---------|--------|------|--------|------|-----|--|
|        | series   |      | 5       |        |      |        |      |     |  |
| Cl     | K series | 0.31 | 0.00269 | 2.25   | 0.13 | 0.83   | NaCl | Yes |  |
| Total: |          |      |         | 100.00 |      | 100.00 |      |     |  |

Electron Image 11

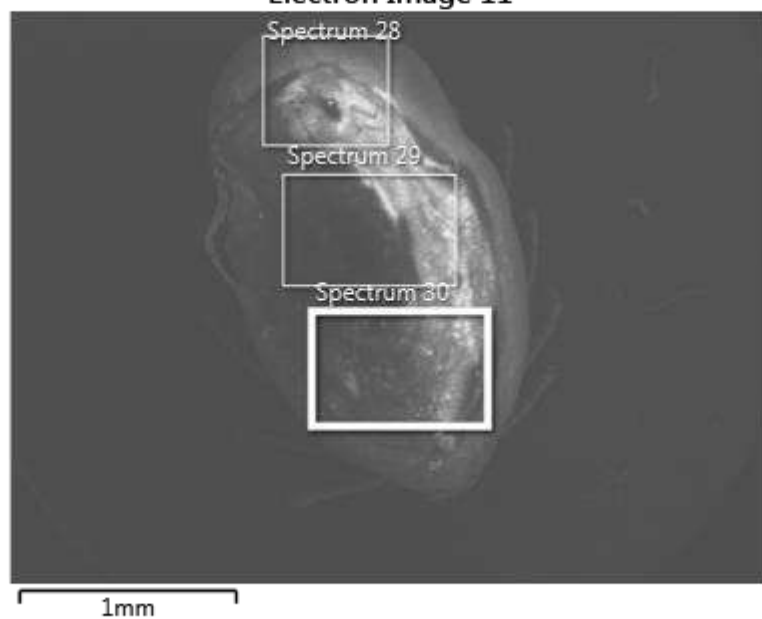

23/01/2020 09:52:09

Project 1

Rumania 1

Pecho 1 15 Kv

Electron Image 13

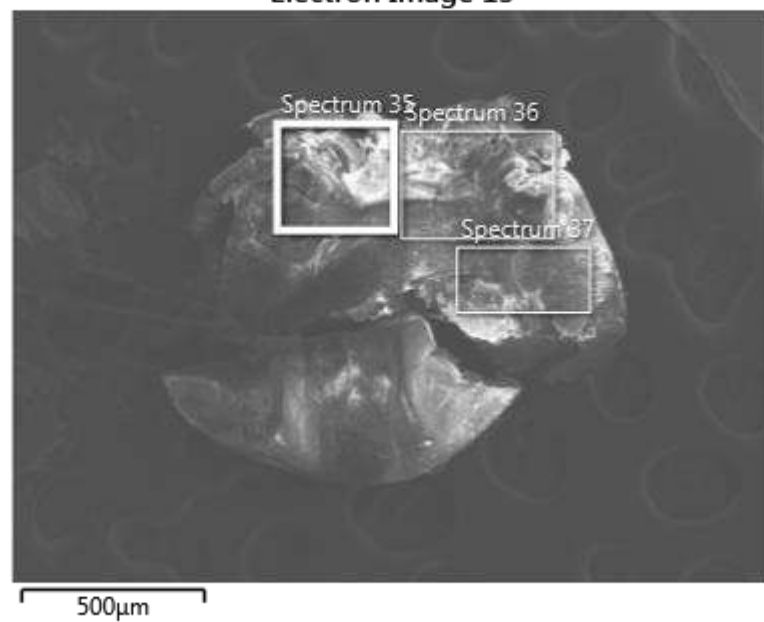

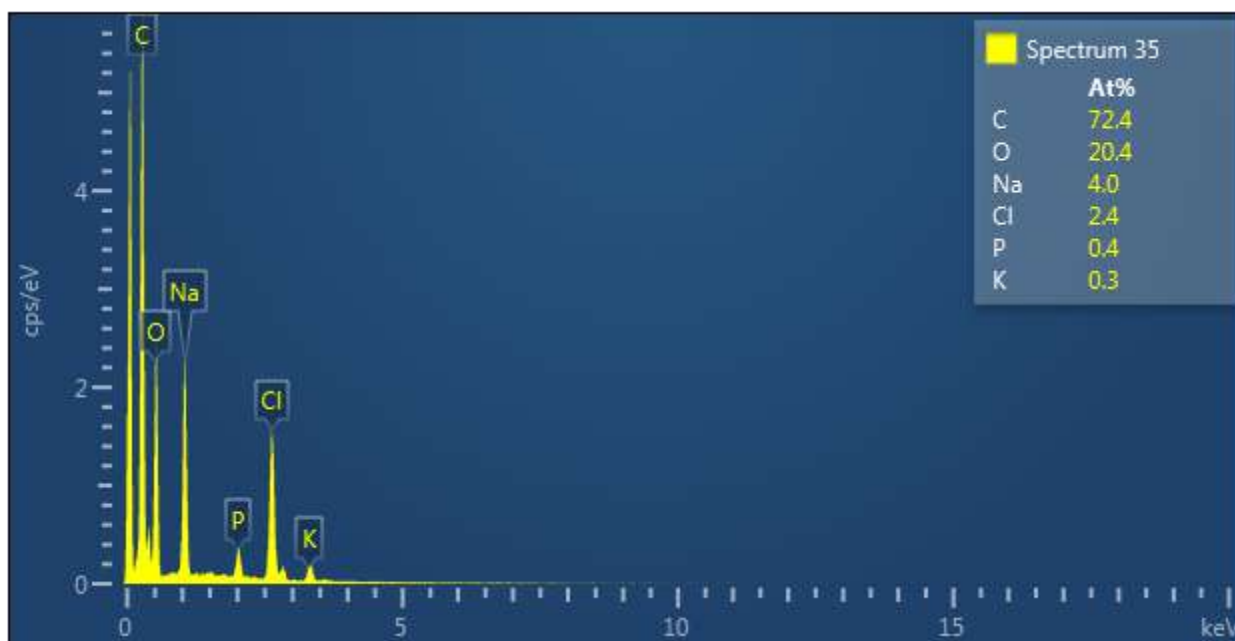

|                                 |                     |
|---------------------------------|---------------------|
| Label:                          | Spectrum 35         |
| Source:                         | Acquired            |
| Created:                        | 23/01/2020 09:52:09 |
| Livetime:                       | 60.1s               |
| Process Time:                   | 4                   |
| Accelerating Voltage:           | 15.00kV             |
| Magnification:                  | 54 x                |
| Working Distance:               | 10.0mm              |
| Specimen Tilt (degrees):        | 0.0                 |
| Elevation (degrees):            | 35.0                |
| Azimuth (degrees):              | 0.0                 |
| Number Of Channels:             | 2048                |
| Energy Range (keV):             | 20 keV              |
| Energy per Channel (eV):        | 10.0eV              |
| Detector Type Id:               | 29                  |
| Detector Type:                  | X-Max               |
| Window Type:                    | SATW                |
| Pulse Pile Up Correction:       | Succeeded           |
| Primary Detector:               | 2617                |
| Primary Detector Serial Number: | 77871-X080          |

| Element | Line Type | Apparent Concentration | k Ratio | Wt%   | Wt% Sigma | Atomic % | Standard Label | Factory Standard | Standard Calibration Date |
|---------|-----------|------------------------|---------|-------|-----------|----------|----------------|------------------|---------------------------|
| C       | K series  | 9.70                   | 0.09695 | 62.14 | 0.53      | 72.42    | C Vit          | Yes              |                           |
| O       | K series  | 6.72                   | 0.02262 | 23.35 | 0.42      | 20.43    | SiO2           | Yes              |                           |
| Na      | K         | 3.73                   | 0.0157  | 6.53  | 0.13      | 3.98     | Albite         | Yes              |                           |

|        |          |      |         |        |      |        |      |     |  |
|--------|----------|------|---------|--------|------|--------|------|-----|--|
|        | series   |      | 5       |        |      |        |      |     |  |
| P      | K series | 0.63 | 0.00354 | 0.95   | 0.05 | 0.43   | GaP  | Yes |  |
| Cl     | K series | 2.66 | 0.02325 | 6.09   | 0.13 | 2.41   | NaCl | Yes |  |
| K      | K series | 0.42 | 0.00355 | 0.93   | 0.06 | 0.33   | KBr  | Yes |  |
| Total: |          |      |         | 100.00 |      | 100.00 |      |     |  |

Electron Image 13

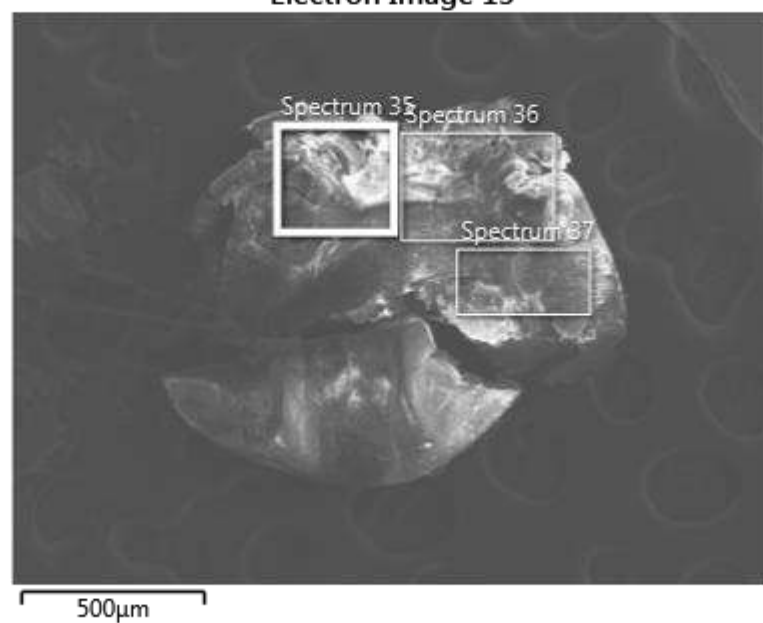

23/01/2020 09:53:19

Project 1

Rumania 1

Pecho 1 15 Kv

Electron Image 13

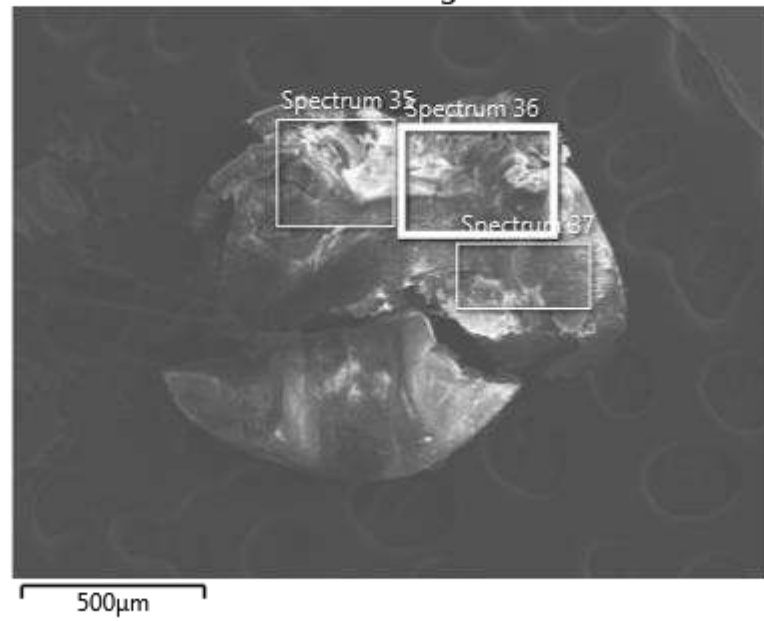

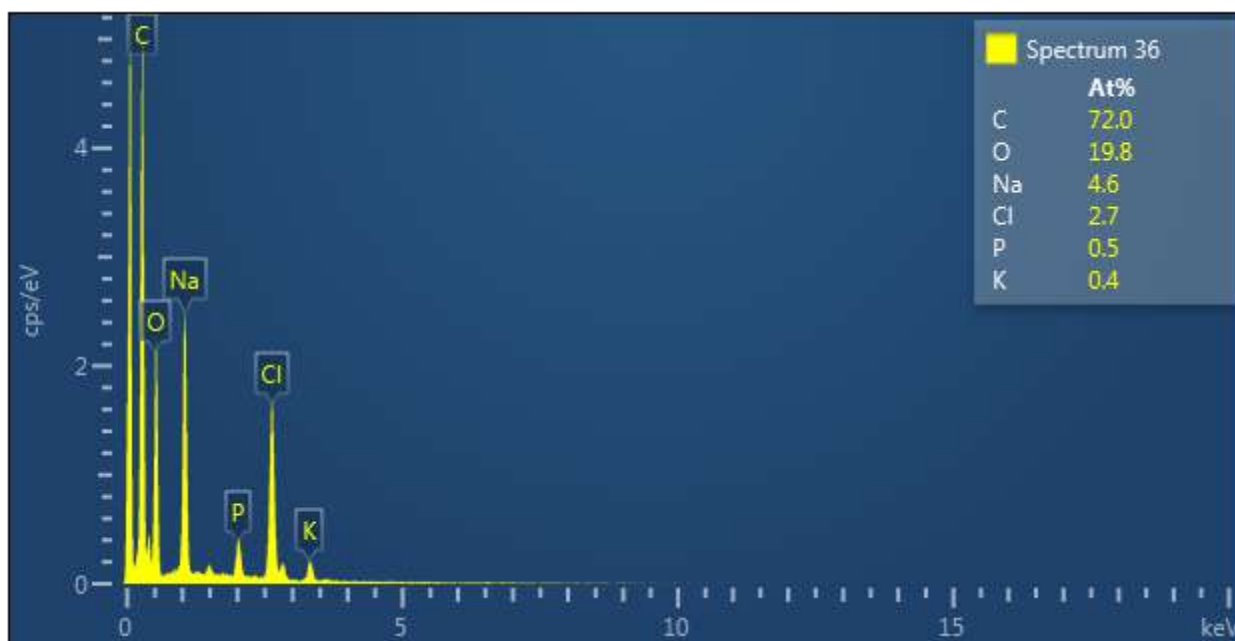

|                                 |                     |
|---------------------------------|---------------------|
| Label:                          | Spectrum 36         |
| Source:                         | Acquired            |
| Created:                        | 23/01/2020 09:53:19 |
| Livetime:                       | 60.2s               |
| Process Time:                   | 4                   |
| Accelerating Voltage:           | 15.00kV             |
| Magnification:                  | 54 x                |
| Working Distance:               | 10.0mm              |
| Specimen Tilt (degrees):        | 0.0                 |
| Elevation (degrees):            | 35.0                |
| Azimuth (degrees):              | 0.0                 |
| Number Of Channels:             | 2048                |
| Energy Range (keV):             | 20 keV              |
| Energy per Channel (eV):        | 10.0eV              |
| Detector Type Id:               | 29                  |
| Detector Type:                  | X-Max               |
| Window Type:                    | SATW                |
| Pulse Pile Up Correction:       | Succeeded           |
| Primary Detector:               | 2617                |
| Primary Detector Serial Number: | 77871-X080          |

| Element | Line Type | Apparent Concentration | k Ratio | Wt%   | Wt% Sigma | Atomic % | Standard Label | Factory Standard | Standard Calibration Date |
|---------|-----------|------------------------|---------|-------|-----------|----------|----------------|------------------|---------------------------|
| C       | K series  | 8.60                   | 0.08600 | 61.14 | 0.55      | 71.97    | C Vit          | Yes              |                           |
| O       | K series  | 6.25                   | 0.02103 | 22.42 | 0.42      | 19.81    | SiO2           | Yes              |                           |
| Na      | K         | 4.22                   | 0.0178  | 7.55  | 0.15      | 4.64     | Albite         | Yes              |                           |

|        |          |      |         |        |      |        |      |     |  |
|--------|----------|------|---------|--------|------|--------|------|-----|--|
|        | series   |      | 0       |        |      |        |      |     |  |
| P      | K series | 0.76 | 0.00423 | 1.17   | 0.06 | 0.53   | GaP  | Yes |  |
| Cl     | K series | 2.83 | 0.02469 | 6.69   | 0.14 | 2.67   | NaCl | Yes |  |
| K      | K series | 0.45 | 0.00382 | 1.04   | 0.06 | 0.38   | KBr  | Yes |  |
| Total: |          |      |         | 100.00 |      | 100.00 |      |     |  |

Electron Image 13

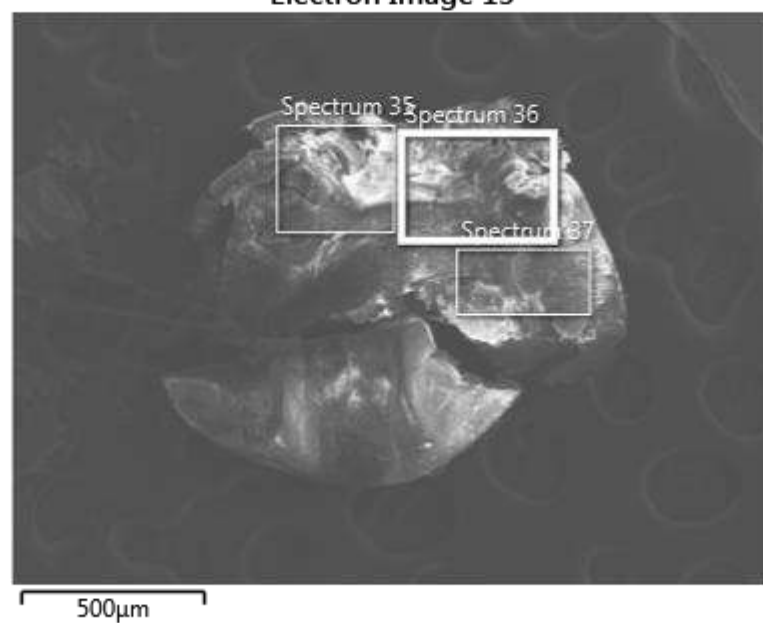



23/01/2020 09:54:28

Project 1

Rumania 1

Pecho 1 15 Kv

Electron Image 13

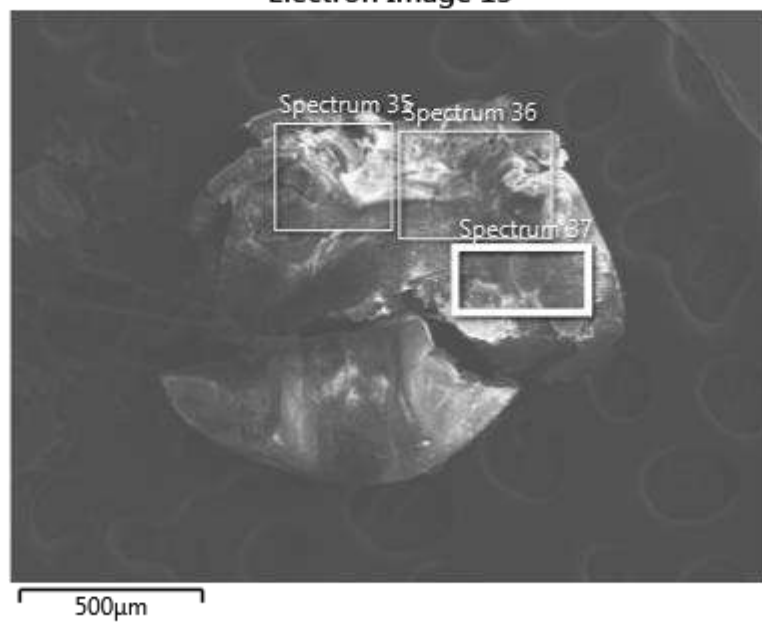

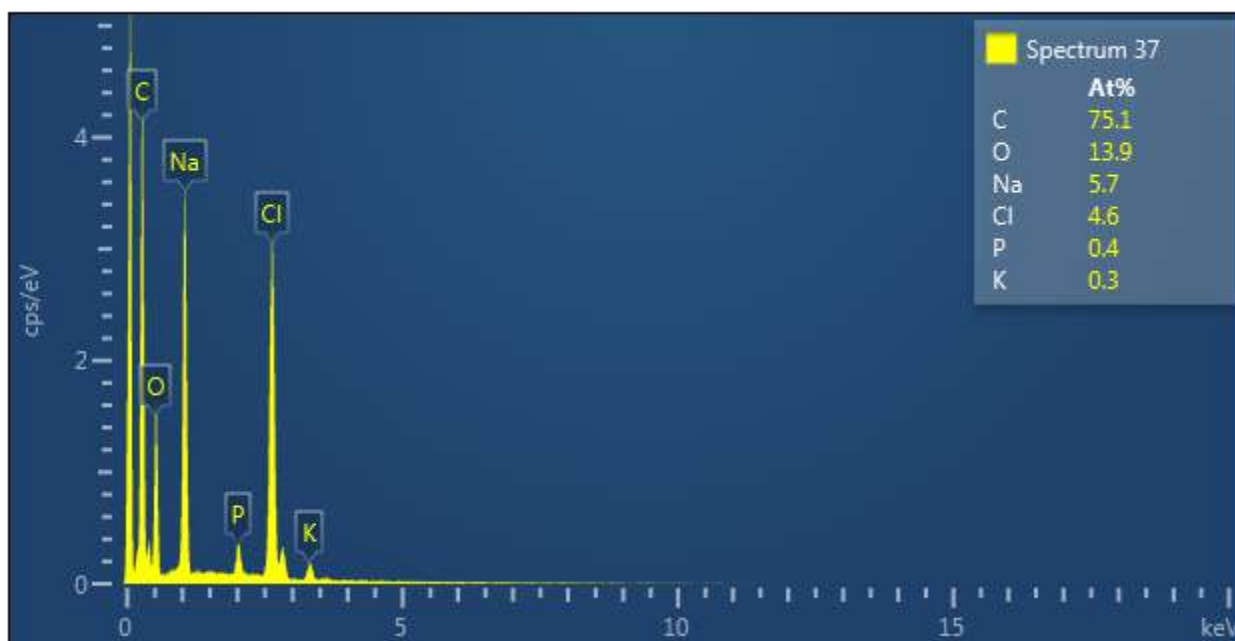

|                                 |                     |
|---------------------------------|---------------------|
| Label:                          | Spectrum 37         |
| Source:                         | Acquired            |
| Created:                        | 23/01/2020 09:54:28 |
| Livetime:                       | 60.4s               |
| Process Time:                   | 4                   |
| Accelerating Voltage:           | 15.00kV             |
| Magnification:                  | 54 x                |
| Working Distance:               | 10.0mm              |
| Specimen Tilt (degrees):        | 0.0                 |
| Elevation (degrees):            | 35.0                |
| Azimuth (degrees):              | 0.0                 |
| Number Of Channels:             | 2048                |
| Energy Range (keV):             | 20 keV              |
| Energy per Channel (eV):        | 10.0eV              |
| Detector Type Id:               | 29                  |
| Detector Type:                  | X-Max               |
| Window Type:                    | SATW                |
| Pulse Pile Up Correction:       | Succeeded           |
| Primary Detector:               | 2617                |
| Primary Detector Serial Number: | 77871-X080          |

| Element | Line Type | Apparent Concentration | k Ratio | Wt%   | Wt% Sigma | Atomic % | Standard Label | Factory Standard | Standard Calibration Date |
|---------|-----------|------------------------|---------|-------|-----------|----------|----------------|------------------|---------------------------|
| C       | K series  | 7.34                   | 0.07337 | 62.53 | 0.56      | 75.10    | C Vit          | Yes              |                           |
| O       | K series  | 4.44                   | 0.01493 | 15.43 | 0.36      | 13.91    | SiO2           | Yes              |                           |
| Na      | K         | 5.91                   | 0.0249  | 9.07  | 0.17      | 5.69     | Albite         | Yes              |                           |

|        |          |      |         |        |      |        |      |     |  |
|--------|----------|------|---------|--------|------|--------|------|-----|--|
|        | series   |      | 5       |        |      |        |      |     |  |
| P      | K series | 0.60 | 0.00333 | 0.82   | 0.05 | 0.38   | GaP  | Yes |  |
| Cl     | K series | 5.39 | 0.04711 | 11.35  | 0.20 | 4.62   | NaCl | Yes |  |
| K      | K series | 0.38 | 0.00325 | 0.80   | 0.05 | 0.30   | KBr  | Yes |  |
| Total: |          |      |         | 100.00 |      | 100.00 |      |     |  |

Electron Image 13

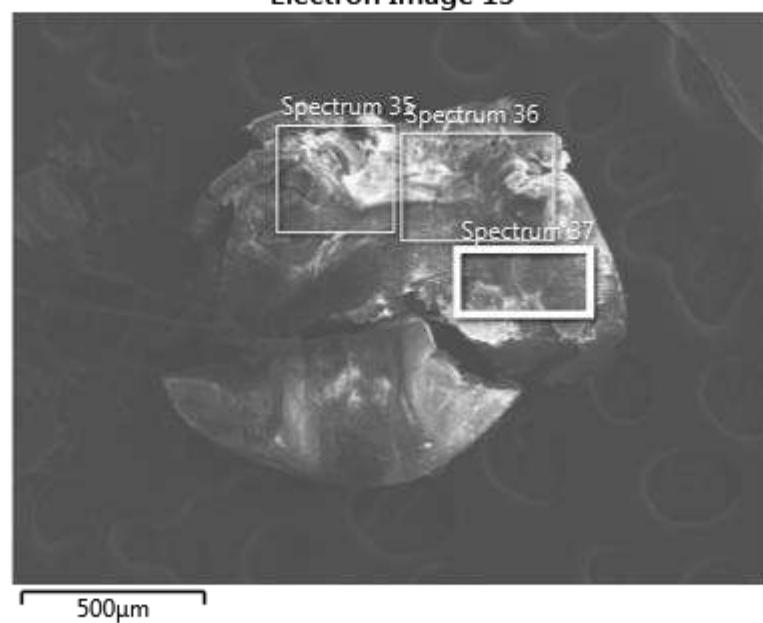

23/01/2020 09:56:31

Project 1

Rumania 1

Ventral 1 15 Kv

Electron Image 14

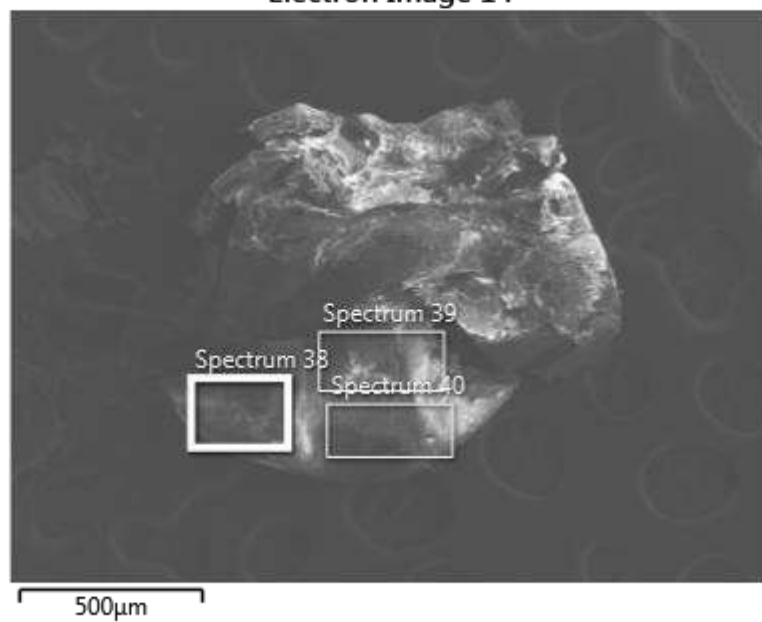

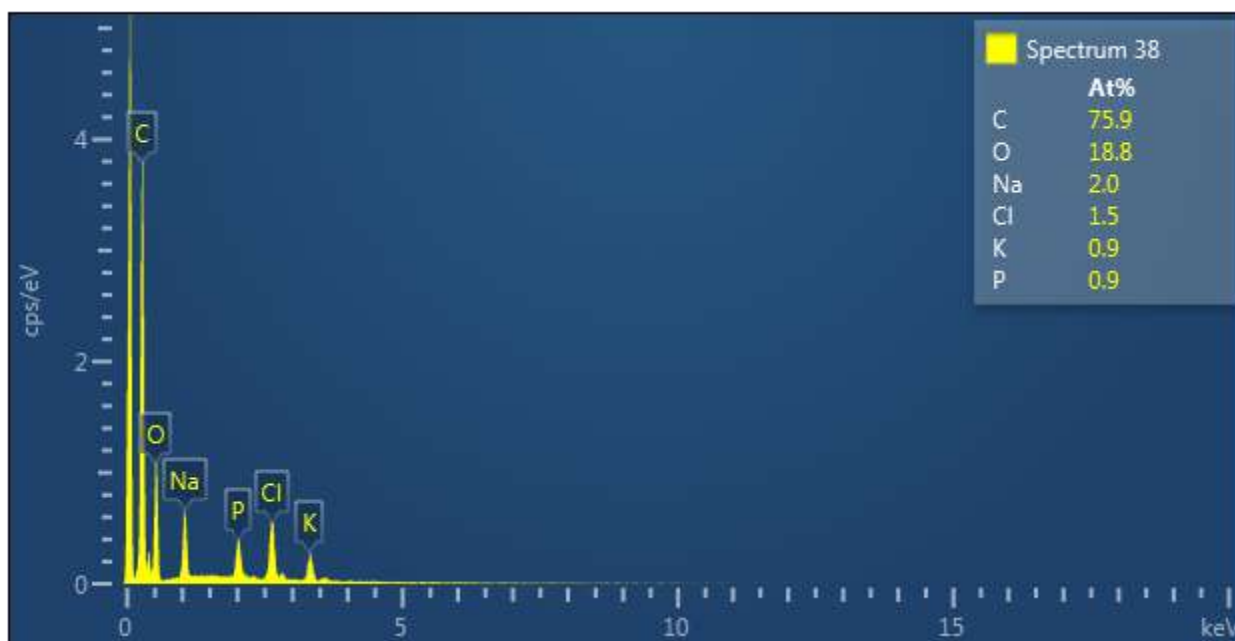

|                                 |                     |
|---------------------------------|---------------------|
| Label:                          | Spectrum 38         |
| Source:                         | Acquired            |
| Created:                        | 23/01/2020 09:56:31 |
| Livetime:                       | 60.4s               |
| Process Time:                   | 4                   |
| Accelerating Voltage:           | 15.00kV             |
| Magnification:                  | 54 x                |
| Working Distance:               | 10.0mm              |
| Specimen Tilt (degrees):        | 0.0                 |
| Elevation (degrees):            | 35.0                |
| Azimuth (degrees):              | 0.0                 |
| Number Of Channels:             | 2048                |
| Energy Range (keV):             | 20 keV              |
| Energy per Channel (eV):        | 10.0eV              |
| Detector Type Id:               | 29                  |
| Detector Type:                  | X-Max               |
| Window Type:                    | SATW                |
| Pulse Pile Up Correction:       | Succeeded           |
| Primary Detector:               | 2617                |
| Primary Detector Serial Number: | 77871-X080          |

| Element | Line Type | Apparent Concentration | k Ratio | Wt%   | Wt% Sigma | Atomic % | Standard Label | Factory Standard | Standard Calibration Date |
|---------|-----------|------------------------|---------|-------|-----------|----------|----------------|------------------|---------------------------|
| C       | K series  | 6.93                   | 0.06928 | 66.34 | 0.62      | 75.89    | C Vit          | Yes              |                           |
| O       | K series  | 3.27                   | 0.01100 | 21.92 | 0.54      | 18.83    | SiO2           | Yes              |                           |
| Na      | K         | 1.05                   | 0.0044  | 3.37  | 0.13      | 2.02     | Albite         | Yes              |                           |

|        |          |      |         |        |      |        |      |     |  |
|--------|----------|------|---------|--------|------|--------|------|-----|--|
|        | series   |      | 3       |        |      |        |      |     |  |
| P      | K series | 0.73 | 0.00407 | 1.97   | 0.10 | 0.87   | GaP  | Yes |  |
| Cl     | K series | 0.94 | 0.00820 | 3.90   | 0.14 | 1.51   | NaCl | Yes |  |
| K      | K series | 0.62 | 0.00526 | 2.50   | 0.12 | 0.88   | KBr  | Yes |  |
| Total: |          |      |         | 100.00 |      | 100.00 |      |     |  |

Electron Image 14

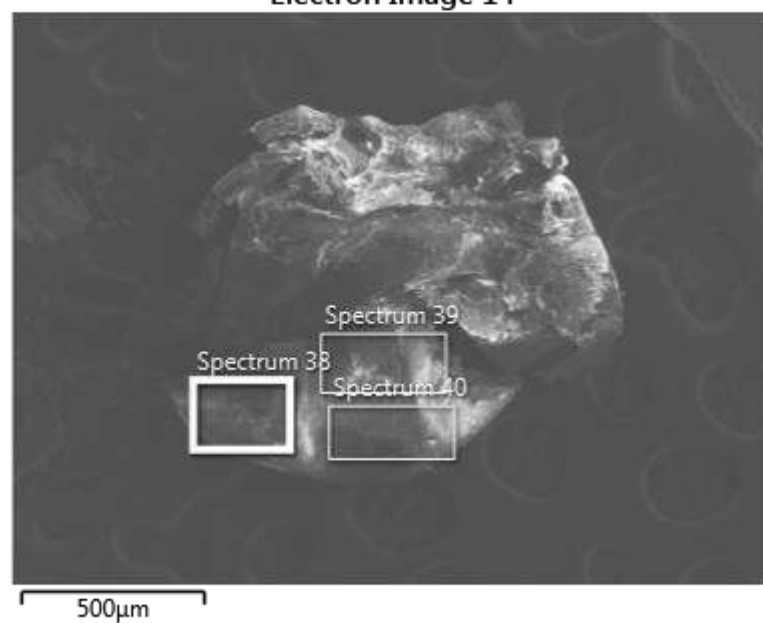

23/01/2020 09:57:43

Project 1

Rumania 1

Ventral 1 15 Kv

Electron Image 14

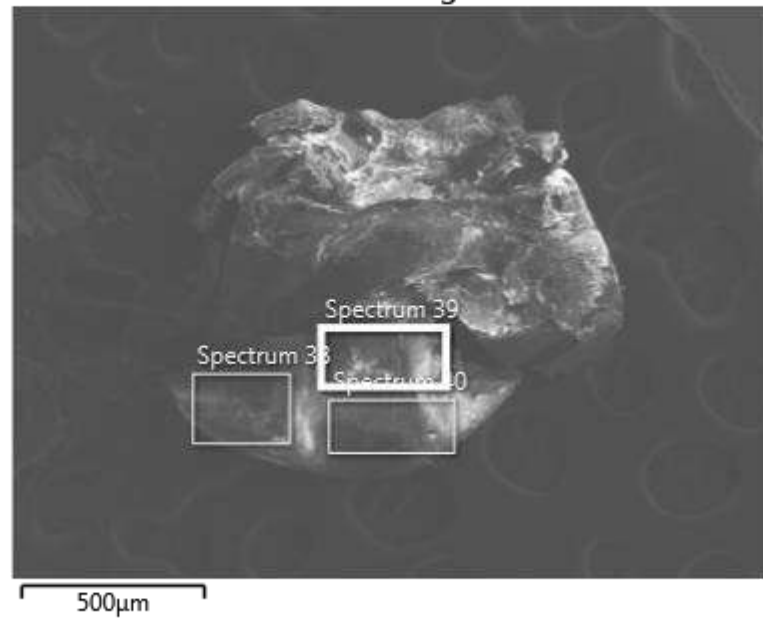

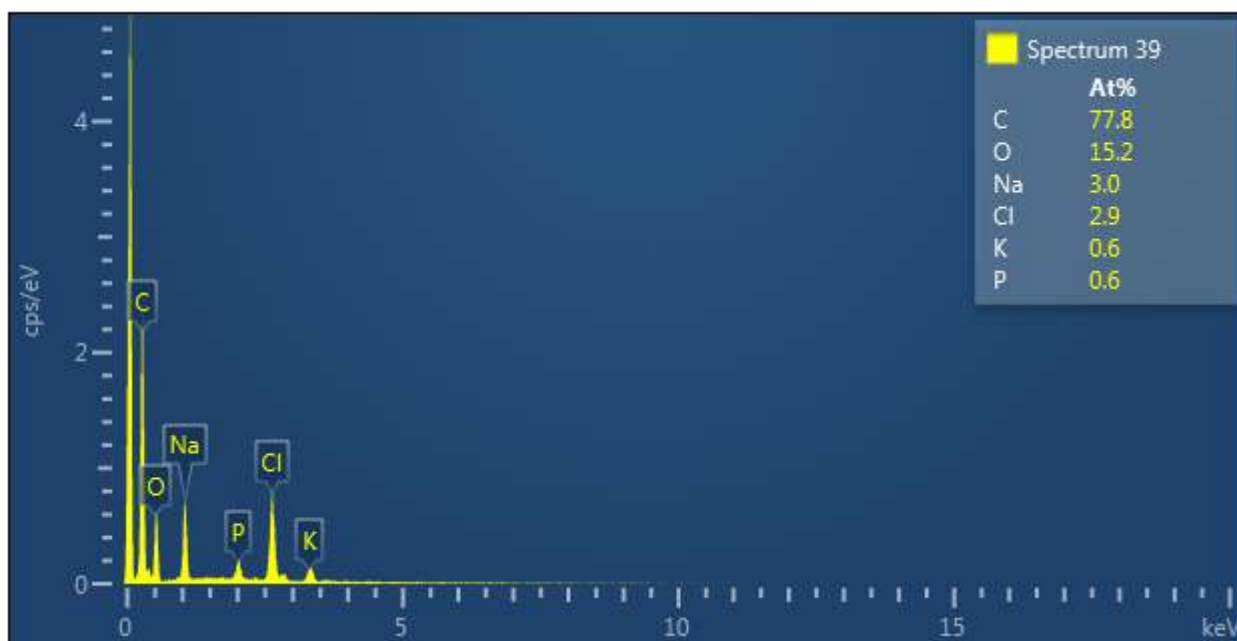

|                                 |                     |
|---------------------------------|---------------------|
| Label:                          | Spectrum 39         |
| Source:                         | Acquired            |
| Created:                        | 23/01/2020 09:57:43 |
| Livetime:                       | 60.3s               |
| Process Time:                   | 4                   |
| Accelerating Voltage:           | 15.00kV             |
| Magnification:                  | 54 x                |
| Working Distance:               | 10.0mm              |
| Specimen Tilt (degrees):        | 0.0                 |
| Elevation (degrees):            | 35.0                |
| Azimuth (degrees):              | 0.0                 |
| Number Of Channels:             | 2048                |
| Energy Range (keV):             | 20 keV              |
| Energy per Channel (eV):        | 10.0eV              |
| Detector Type Id:               | 29                  |
| Detector Type:                  | X-Max               |
| Window Type:                    | SATW                |
| Pulse Pile Up Correction:       | Succeeded           |
| Primary Detector:               | 2617                |
| Primary Detector Serial Number: | 77871-X080          |

| Element | Line Type | Apparent Concentration | k Ratio | Wt%   | Wt% Sigma | Atomic % | Standard Label | Factory Standard | Standard Calibration Date |
|---------|-----------|------------------------|---------|-------|-----------|----------|----------------|------------------|---------------------------|
| C       | K series  | 3.95                   | 0.03951 | 67.25 | 0.79      | 77.76    | C Vit          | Yes              |                           |
| O       | K series  | 1.81                   | 0.00608 | 17.51 | 0.61      | 15.20    | SiO2           | Yes              |                           |
| Na      | K         | 1.16                   | 0.0049  | 5.02  | 0.18      | 3.03     | Albite         | Yes              |                           |



|        |          |      |         |        |      |        |      |     |  |
|--------|----------|------|---------|--------|------|--------|------|-----|--|
|        | series   |      | 0       |        |      |        |      |     |  |
| P      | K series | 0.33 | 0.00186 | 1.24   | 0.10 | 0.56   | GaP  | Yes |  |
| Cl     | K series | 1.27 | 0.01108 | 7.29   | 0.23 | 2.86   | NaCl | Yes |  |
| K      | K series | 0.30 | 0.00252 | 1.68   | 0.13 | 0.60   | KBr  | Yes |  |
| Total: |          |      |         | 100.00 |      | 100.00 |      |     |  |

Electron Image 14

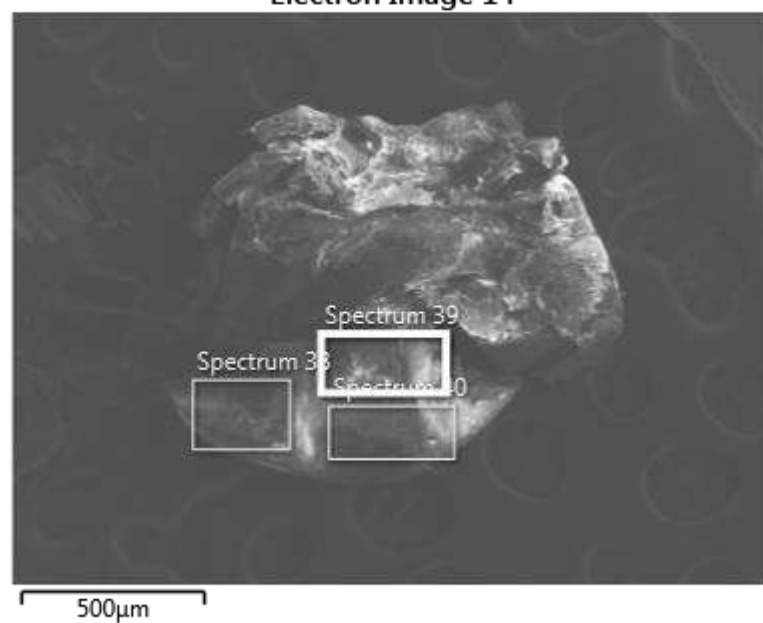

23/01/2020 09:58:53

Project 1

Rumania 1

Ventral 1 15 Kv

Electron Image 14

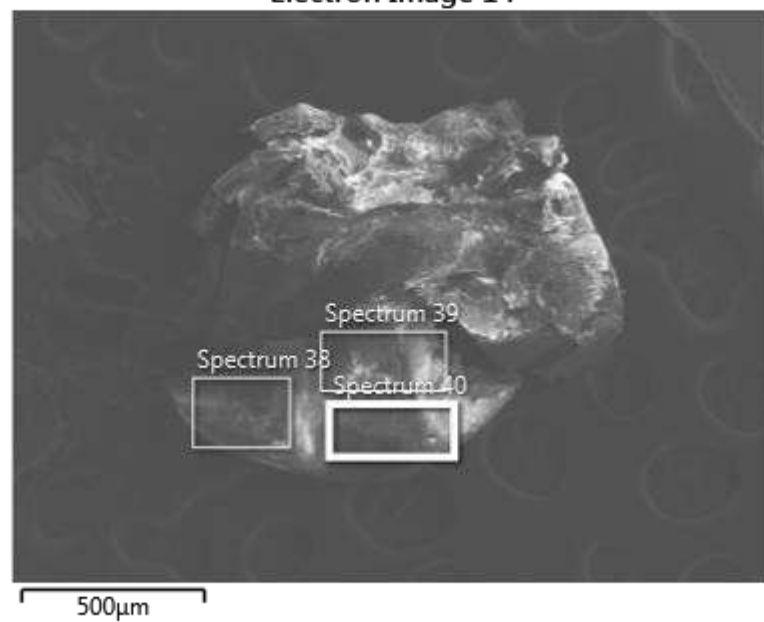

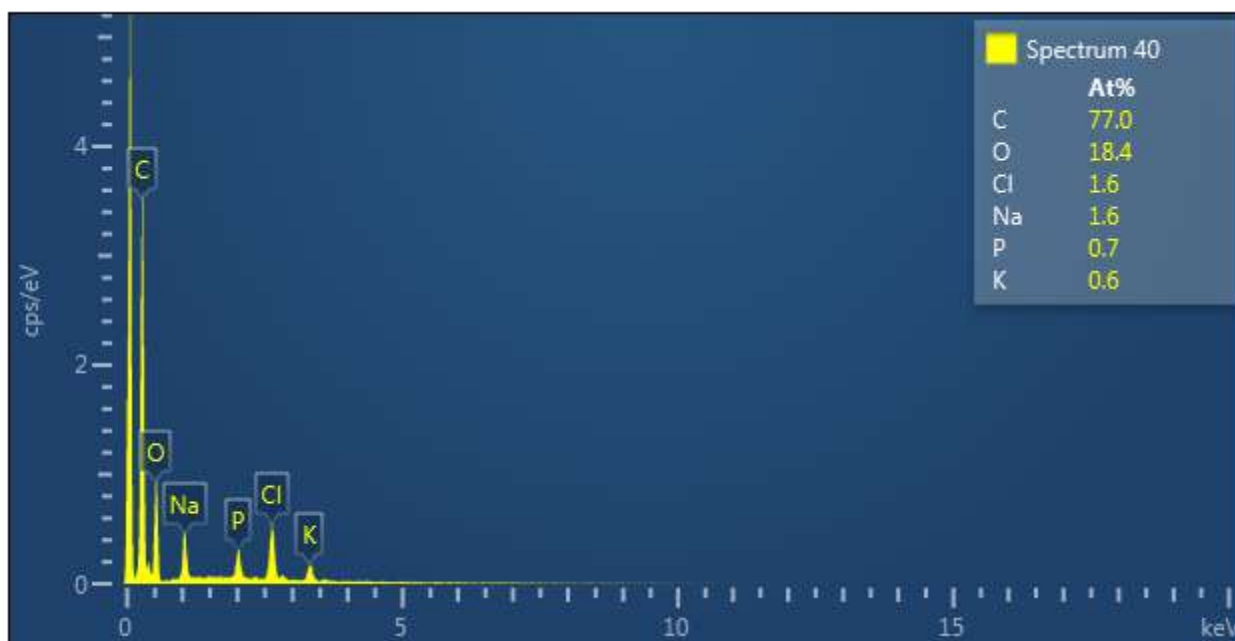

|                                 |                     |
|---------------------------------|---------------------|
| Label:                          | Spectrum 40         |
| Source:                         | Acquired            |
| Created:                        | 23/01/2020 09:58:53 |
| Livetime:                       | 60.2s               |
| Process Time:                   | 4                   |
| Accelerating Voltage:           | 15.00kV             |
| Magnification:                  | 54 x                |
| Working Distance:               | 10.0mm              |
| Specimen Tilt (degrees):        | 0.0                 |
| Elevation (degrees):            | 35.0                |
| Azimuth (degrees):              | 0.0                 |
| Number Of Channels:             | 2048                |
| Energy Range (keV):             | 20 keV              |
| Energy per Channel (eV):        | 10.0eV              |
| Detector Type Id:               | 29                  |
| Detector Type:                  | X-Max               |
| Window Type:                    | SATW                |
| Pulse Pile Up Correction:       | Succeeded           |
| Primary Detector:               | 2617                |
| Primary Detector Serial Number: | 77871-X080          |

| Element | Line Type | Apparent Concentration | k Ratio | Wt%   | Wt% Sigma | Atomic % | Standard Label | Factory Standard | Standard Calibration Date |
|---------|-----------|------------------------|---------|-------|-----------|----------|----------------|------------------|---------------------------|
| C       | K series  | 6.31                   | 0.06310 | 68.04 | 0.65      | 77.03    | C Vit          | Yes              |                           |
| O       | K series  | 2.81                   | 0.00945 | 21.70 | 0.57      | 18.45    | SiO2           | Yes              |                           |
| Na      | K         | 0.73                   | 0.0030  | 2.68  | 0.12      | 1.59     | Albite         | Yes              |                           |

|        |          |      |         |        |      |        |      |     |  |
|--------|----------|------|---------|--------|------|--------|------|-----|--|
|        | series   |      | 8       |        |      |        |      |     |  |
| P      | K series | 0.55 | 0.00305 | 1.68   | 0.10 | 0.74   | GaP  | Yes |  |
| Cl     | K series | 0.87 | 0.00762 | 4.14   | 0.15 | 1.59   | NaCl | Yes |  |
| K      | K series | 0.38 | 0.00324 | 1.76   | 0.11 | 0.61   | KBr  | Yes |  |
| Total: |          |      |         | 100.00 |      | 100.00 |      |     |  |

Electron Image 14

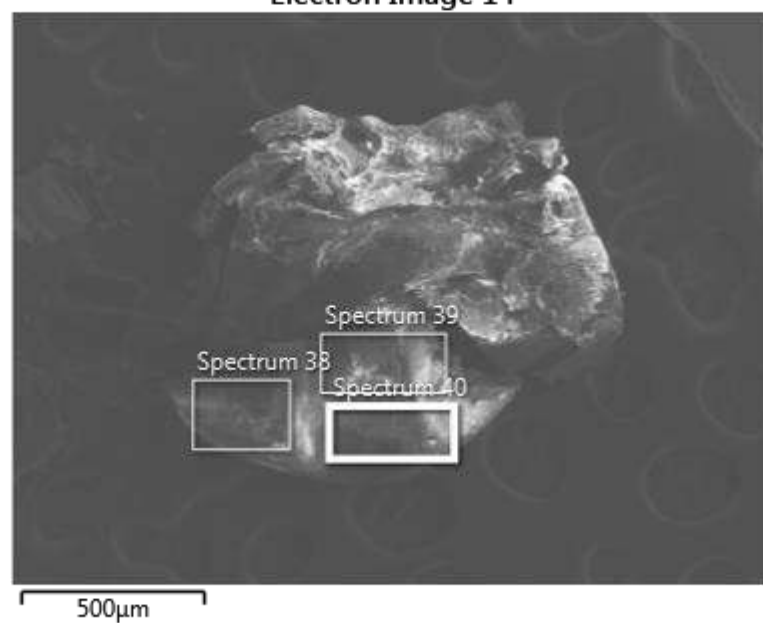

23/01/2020 10:11:43  
Project 1  
Rumania 10  
Dorso 1 15 Kv

Electron Image 15

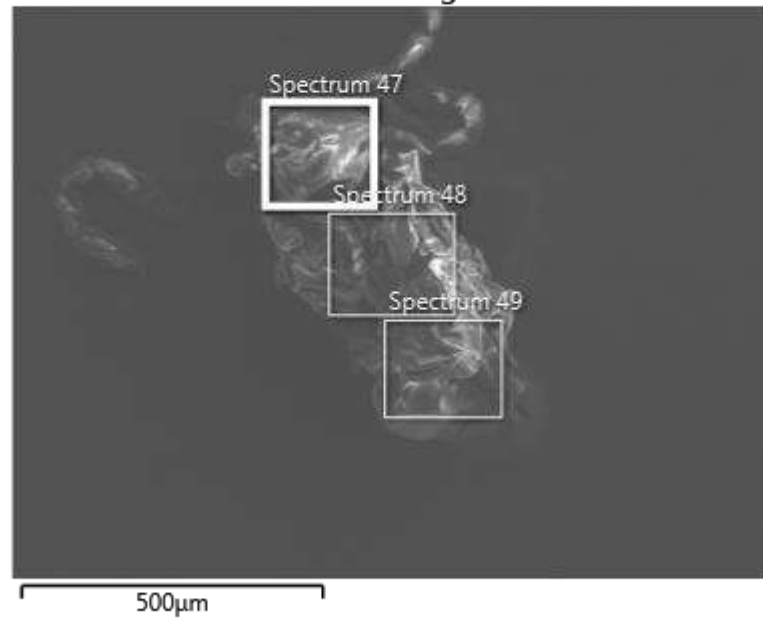

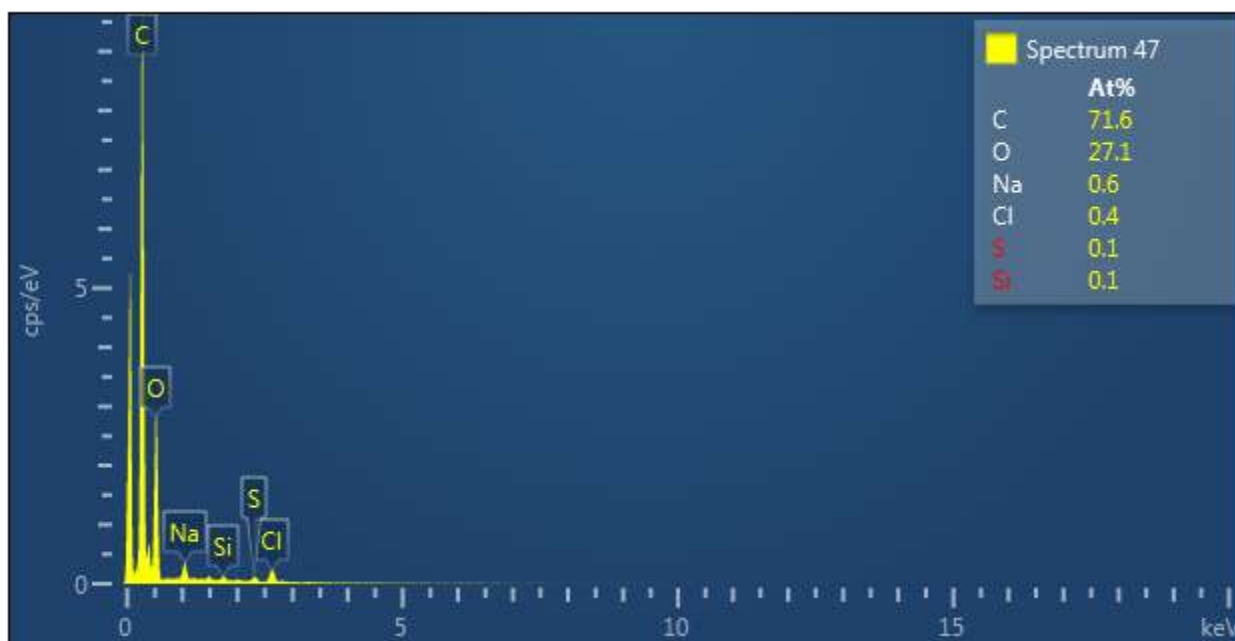

|                                 |                     |
|---------------------------------|---------------------|
| Label:                          | Spectrum 47         |
| Source:                         | Acquired            |
| Created:                        | 23/01/2020 10:11:43 |
| Livetime:                       | 60.5s               |
| Process Time:                   | 4                   |
| Accelerating Voltage:           | 15.00kV             |
| Magnification:                  | 89 x                |
| Working Distance:               | 10.0mm              |
| Specimen Tilt (degrees):        | 0.0                 |
| Elevation (degrees):            | 35.0                |
| Azimuth (degrees):              | 0.0                 |
| Number Of Channels:             | 2048                |
| Energy Range (keV):             | 20 keV              |
| Energy per Channel (eV):        | 10.0eV              |
| Detector Type Id:               | 29                  |
| Detector Type:                  | X-Max               |
| Window Type:                    | SATW                |
| Pulse Pile Up Correction:       | Succeeded           |
| Primary Detector:               | 2617                |
| Primary Detector Serial Number: | 77871-X080          |

| Element | Line Type | Apparent Concentration | k Ratio | Wt%   | Wt% Sigma | Atomic % | Standard Label | Factory Standard | Standard Calibration Date |
|---------|-----------|------------------------|---------|-------|-----------|----------|----------------|------------------|---------------------------|
| C       | K series  | 14.88                  | 0.14880 | 64.67 | 0.41      | 71.60    | C Vit          | Yes              |                           |
| O       | K series  | 8.42                   | 0.02833 | 32.65 | 0.41      | 27.14    | SiO2           | Yes              |                           |
| Na      | K         | 0.47                   | 0.0020  | 1.07  | 0.07      | 0.62     | Albite         | Yes              |                           |

|        |          |      |         |        |      |        |                  |     |  |
|--------|----------|------|---------|--------|------|--------|------------------|-----|--|
|        | series   |      | 0       |        |      |        |                  |     |  |
| Si     | K series | 0.08 | 0.00067 | 0.22   | 0.04 | 0.10   | SiO <sub>2</sub> | Yes |  |
| S      | K series | 0.13 | 0.00113 | 0.35   | 0.04 | 0.14   | FeS <sub>2</sub> | Yes |  |
| Cl     | K series | 0.37 | 0.00327 | 1.03   | 0.06 | 0.39   | NaCl             | Yes |  |
| Total: |          |      |         | 100.00 |      | 100.00 |                  |     |  |

Electron Image 15

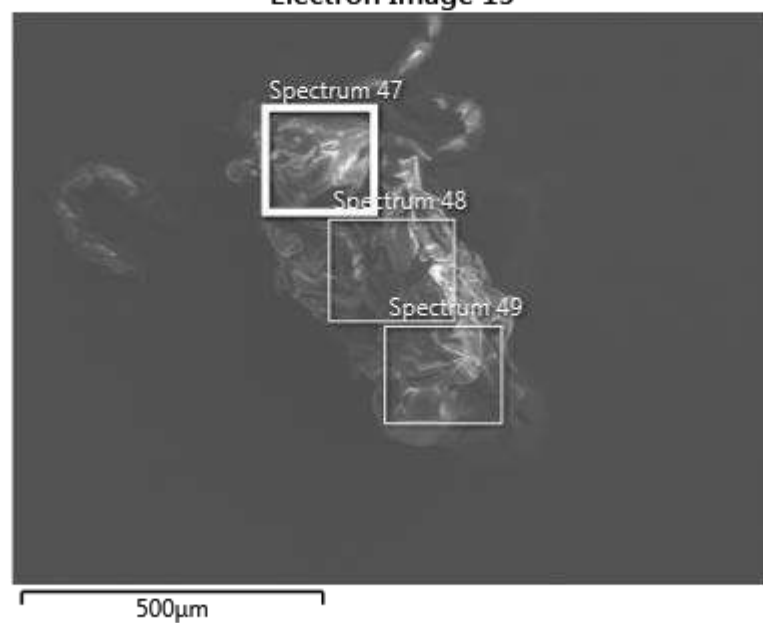

23/01/2020 10:12:55

Project 1

Rumania 10

Dorso 1 15 Kv

Electron Image 15

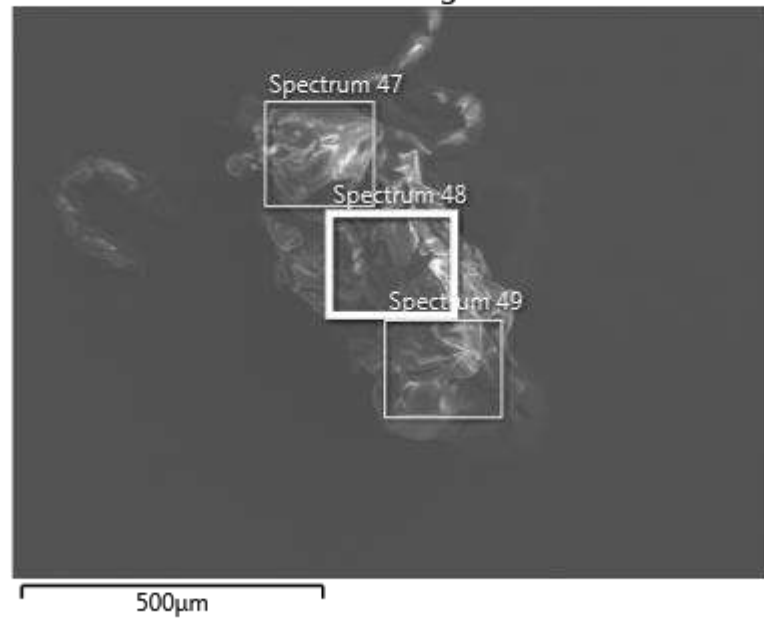



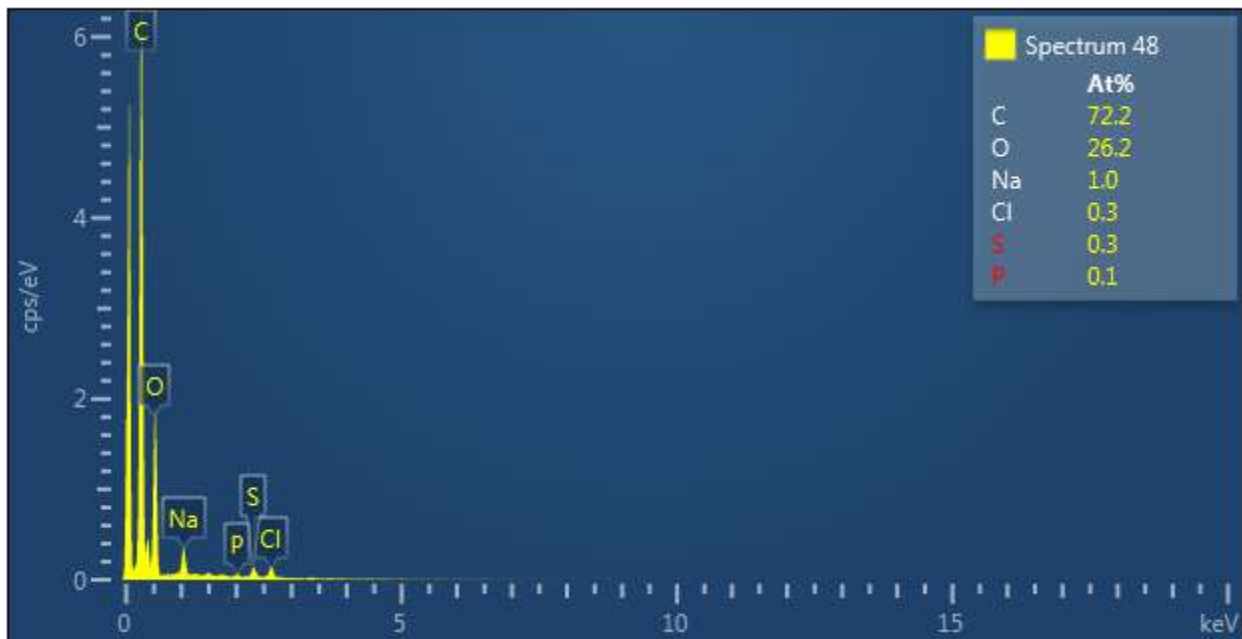

|                                 |                     |
|---------------------------------|---------------------|
| Label:                          | Spectrum 48         |
| Source:                         | Acquired            |
| Created:                        | 23/01/2020 10:12:55 |
| Livetime:                       | 60.0s               |
| Process Time:                   | 4                   |
| Accelerating Voltage:           | 15.00kV             |
| Magnification:                  | 89 x                |
| Working Distance:               | 10.0mm              |
| Specimen Tilt (degrees):        | 0.0                 |
| Elevation (degrees):            | 35.0                |
| Azimuth (degrees):              | 0.0                 |
| Number Of Channels:             | 2048                |
| Energy Range (keV):             | 20 keV              |
| Energy per Channel (eV):        | 10.0eV              |
| Detector Type Id:               | 29                  |
| Detector Type:                  | X-Max               |
| Window Type:                    | SATW                |
| Pulse Pile Up Correction:       | Succeeded           |
| Primary Detector:               | 2617                |
| Primary Detector Serial Number: | 77871-X080          |

| Element | Line Type | Apparent Concentration | k Ratio | Wt%   | Wt% Sigma | Atomic % | Standard Label | Factory Standard | Standard Calibration Date |
|---------|-----------|------------------------|---------|-------|-----------|----------|----------------|------------------|---------------------------|
| C       | K series  | 9.90                   | 0.09896 | 65.15 | 0.52      | 72.15    | C Vit          | Yes              |                           |
| O       | K series  | 5.38                   | 0.01810 | 31.55 | 0.51      | 26.23    | SiO2           | Yes              |                           |
| Na      | K         | 0.50                   | 0.0021  | 1.68  | 0.10      | 0.97     | Albite         | Yes              |                           |

|        |          |      |         |        |      |        |      |     |  |
|--------|----------|------|---------|--------|------|--------|------|-----|--|
|        | series   |      | 1       |        |      |        |      |     |  |
| P      | K series | 0.07 | 0.00042 | 0.20   | 0.05 | 0.09   | GaP  | Yes |  |
| S      | K series | 0.16 | 0.00135 | 0.62   | 0.06 | 0.26   | FeS2 | Yes |  |
| Cl     | K series | 0.19 | 0.00166 | 0.79   | 0.07 | 0.30   | NaCl | Yes |  |
| Total: |          |      |         | 100.00 |      | 100.00 |      |     |  |

Electron Image 15

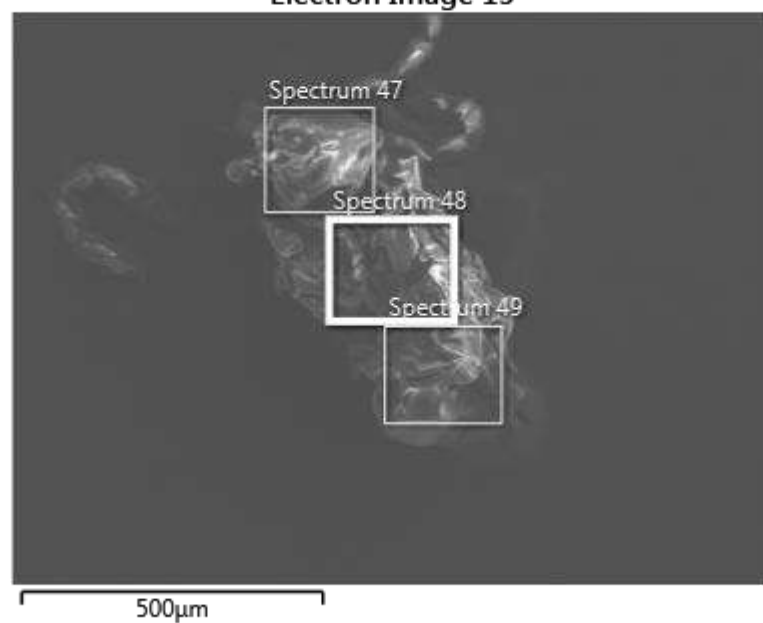

23/01/2020 10:14:05

Project 1

Rumania 10

Dorso 1 15 Kv

Electron Image 15

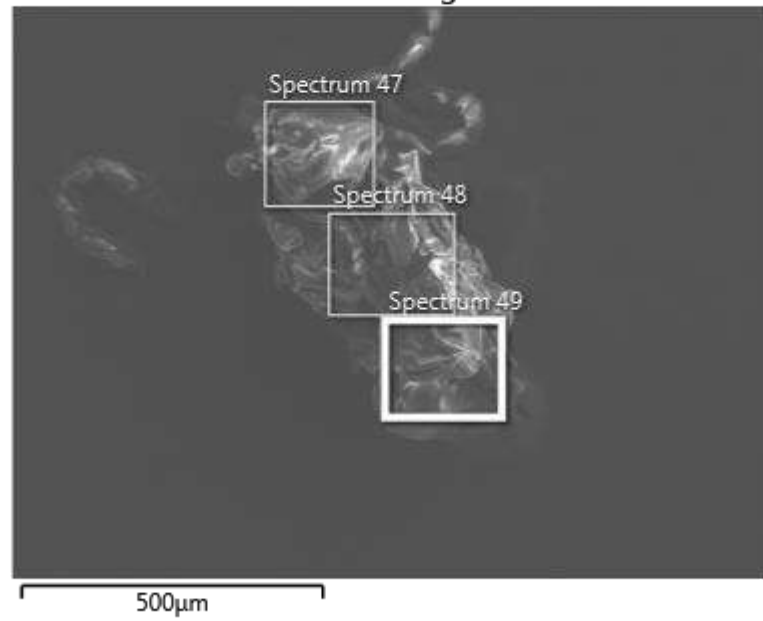

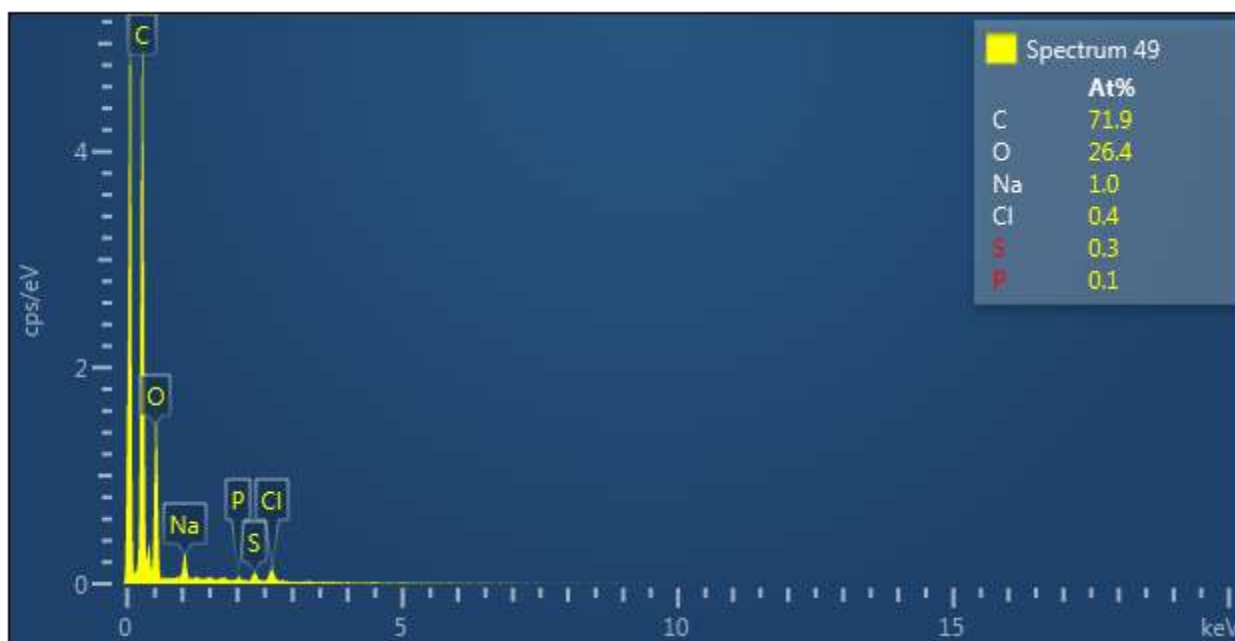

|                                 |                     |
|---------------------------------|---------------------|
| Label:                          | Spectrum 49         |
| Source:                         | Acquired            |
| Created:                        | 23/01/2020 10:14:05 |
| Livetime:                       | 60.4s               |
| Process Time:                   | 4                   |
| Accelerating Voltage:           | 15.00kV             |
| Magnification:                  | 89 x                |
| Working Distance:               | 10.0mm              |
| Specimen Tilt (degrees):        | 0.0                 |
| Elevation (degrees):            | 35.0                |
| Azimuth (degrees):              | 0.0                 |
| Number Of Channels:             | 2048                |
| Energy Range (keV):             | 20 keV              |
| Energy per Channel (eV):        | 10.0eV              |
| Detector Type Id:               | 29                  |
| Detector Type:                  | X-Max               |
| Window Type:                    | SATW                |
| Pulse Pile Up Correction:       | Succeeded           |
| Primary Detector:               | 2617                |
| Primary Detector Serial Number: | 77871-X080          |

| Element | Line Type | Apparent Concentration | k Ratio | Wt%   | Wt% Sigma | Atomic % | Standard Label | Factory Standard | Standard Calibration Date |
|---------|-----------|------------------------|---------|-------|-----------|----------|----------------|------------------|---------------------------|
| C       | K series  | 7.97                   | 0.07967 | 64.80 | 0.57      | 71.91    | C Vit          | Yes              |                           |
| O       | K series  | 4.51                   | 0.01518 | 31.67 | 0.56      | 26.39    | SiO2           | Yes              |                           |
| Na      | K         | 0.41                   | 0.0017  | 1.65  | 0.11      | 0.96     | Albite         | Yes              |                           |

|        |          |      |         |        |      |        |      |     |  |
|--------|----------|------|---------|--------|------|--------|------|-----|--|
|        | series   |      | 3       |        |      |        |      |     |  |
| P      | K series | 0.07 | 0.00037 | 0.21   | 0.06 | 0.09   | GaP  | Yes |  |
| S      | K series | 0.13 | 0.00111 | 0.61   | 0.07 | 0.25   | FeS2 | Yes |  |
| Cl     | K series | 0.21 | 0.00186 | 1.06   | 0.08 | 0.40   | NaCl | Yes |  |
| Total: |          |      |         | 100.00 |      | 100.00 |      |     |  |

Electron Image 15

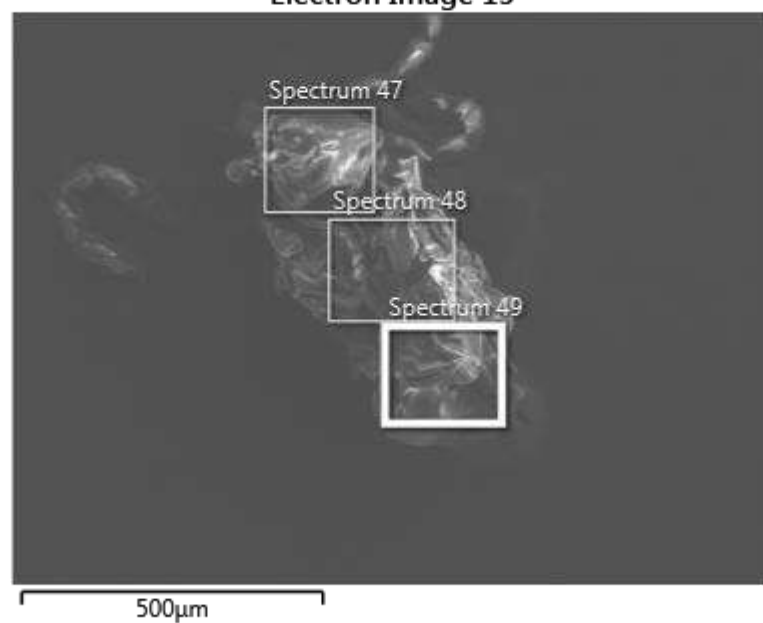

23/01/2020 10:16:54

Project 1

Rumania 4

Pecho 1 15 Kv

Electron Image 17

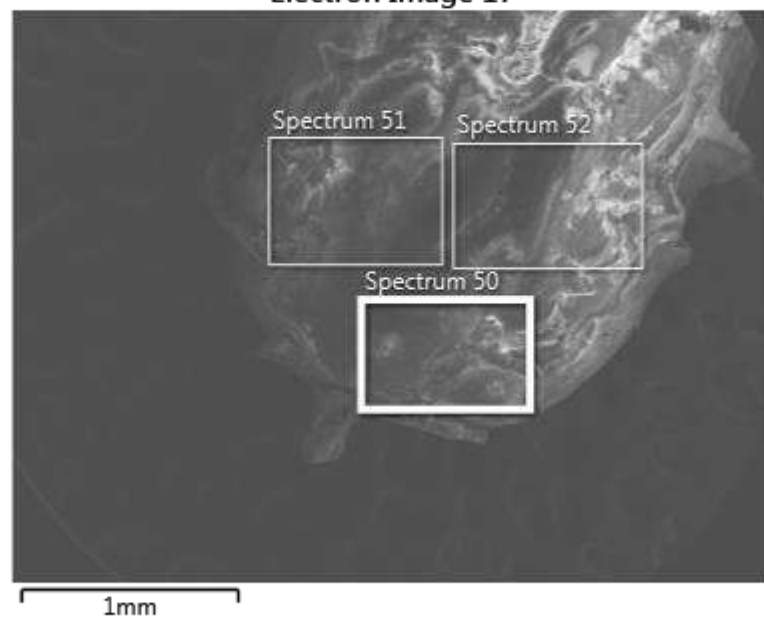

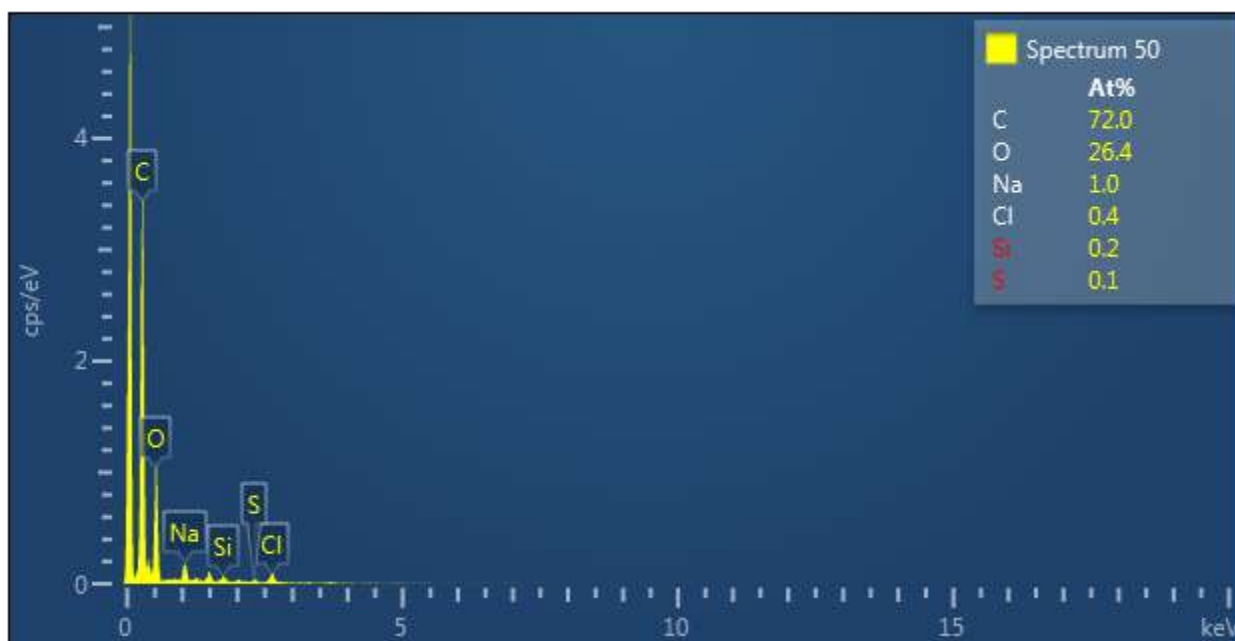

|                                 |                     |
|---------------------------------|---------------------|
| Label:                          | Spectrum 50         |
| Source:                         | Acquired            |
| Created:                        | 23/01/2020 10:16:54 |
| Livetime:                       | 60.1s               |
| Process Time:                   | 4                   |
| Accelerating Voltage:           | 15.00kV             |
| Magnification:                  | 32 x                |
| Working Distance:               | 10.0mm              |
| Specimen Tilt (degrees):        | 0.0                 |
| Elevation (degrees):            | 35.0                |
| Azimuth (degrees):              | 0.0                 |
| Number Of Channels:             | 2048                |
| Energy Range (keV):             | 20 keV              |
| Energy per Channel (eV):        | 10.0eV              |
| Detector Type Id:               | 29                  |
| Detector Type:                  | X-Max               |
| Window Type:                    | SATW                |
| Pulse Pile Up Correction:       | Succeeded           |
| Primary Detector:               | 2617                |
| Primary Detector Serial Number: | 77871-X080          |

| Element | Line Type | Apparent Concentration | k Ratio | Wt%   | Wt% Sigma | Atomic % | Standard Label | Factory Standard | Standard Calibration Date |
|---------|-----------|------------------------|---------|-------|-----------|----------|----------------|------------------|---------------------------|
| C       | K series  | 5.58                   | 0.05584 | 64.93 | 0.67      | 71.96    | C Vit          | Yes              |                           |
| O       | K series  | 3.07                   | 0.01032 | 31.69 | 0.67      | 26.37    | SiO2           | Yes              |                           |
| Na      | K         | 0.29                   | 0.0012  | 1.72  | 0.13      | 1.00     | Albite         | Yes              |                           |

|        |          |      |         |        |      |        |                  |     |  |
|--------|----------|------|---------|--------|------|--------|------------------|-----|--|
|        | series   |      | 2       |        |      |        |                  |     |  |
| Si     | K series | 0.06 | 0.00050 | 0.43   | 0.07 | 0.21   | SiO <sub>2</sub> | Yes |  |
| S      | K series | 0.04 | 0.00034 | 0.28   | 0.06 | 0.12   | FeS <sub>2</sub> | Yes |  |
| Cl     | K series | 0.13 | 0.00113 | 0.95   | 0.09 | 0.36   | NaCl             | Yes |  |
| Total: |          |      |         | 100.00 |      | 100.00 |                  |     |  |

Electron Image 17

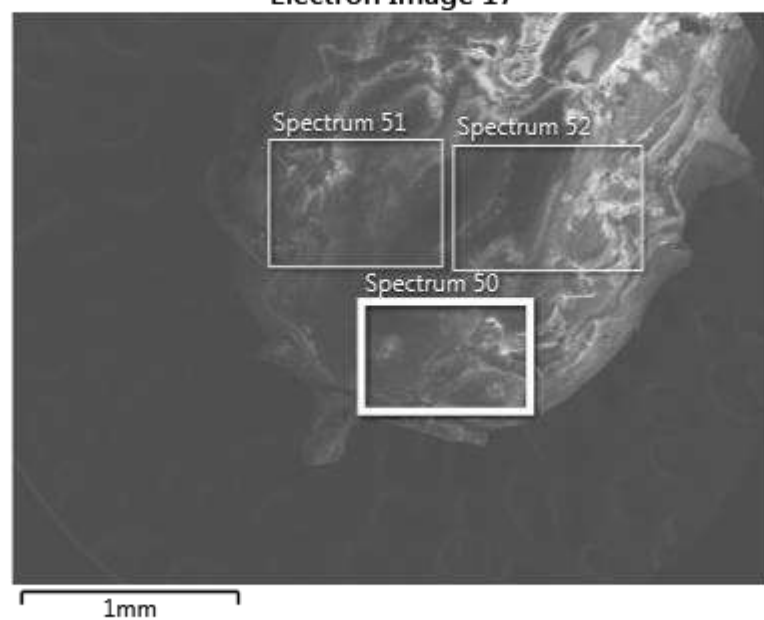



23/01/2020 10:18:02

Project 1

Rumania 4

Pecho 1 15 Kv

Electron Image 17

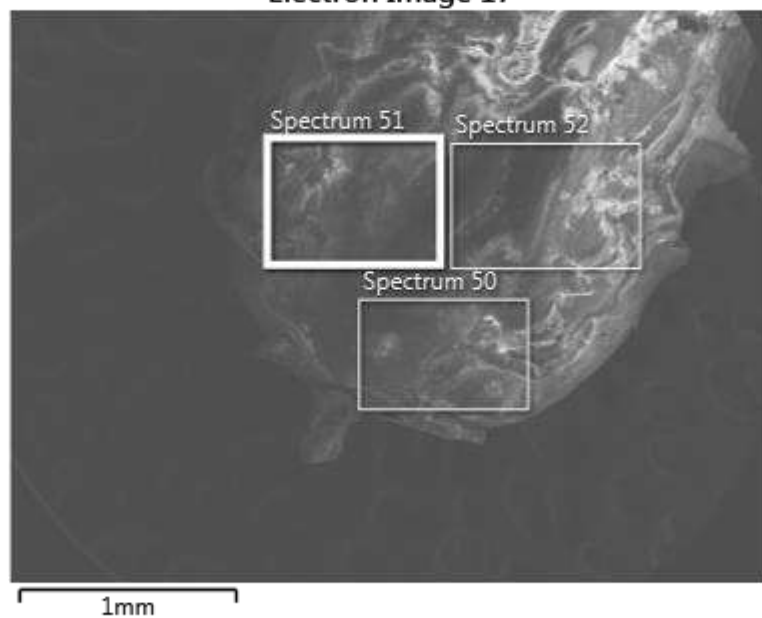

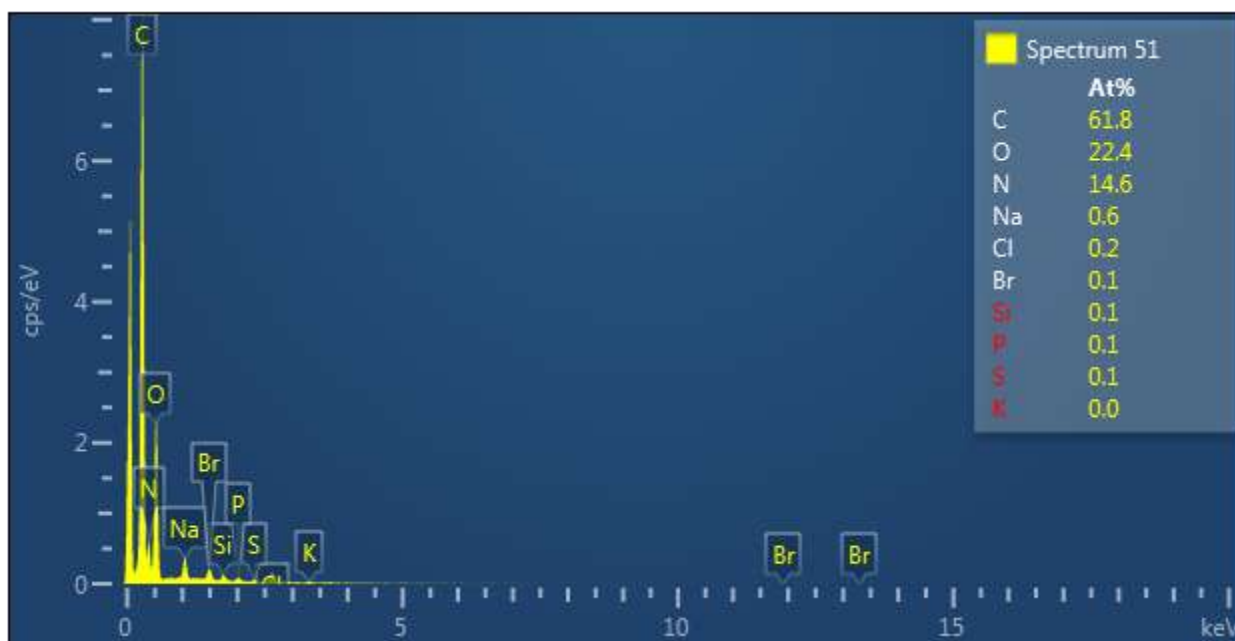

|                                 |                     |
|---------------------------------|---------------------|
| Label:                          | Spectrum 51         |
| Source:                         | Acquired            |
| Created:                        | 23/01/2020 10:18:02 |
| Livetime:                       | 60.0s               |
| Process Time:                   | 4                   |
| Accelerating Voltage:           | 15.00kV             |
| Magnification:                  | 32 x                |
| Working Distance:               | 10.0mm              |
| Specimen Tilt (degrees):        | 0.0                 |
| Elevation (degrees):            | 35.0                |
| Azimuth (degrees):              | 0.0                 |
| Number Of Channels:             | 2048                |
| Energy Range (keV):             | 20 keV              |
| Energy per Channel (eV):        | 10.0eV              |
| Detector Type Id:               | 29                  |
| Detector Type:                  | X-Max               |
| Window Type:                    | SATW                |
| Pulse Pile Up Correction:       | Succeeded           |
| Primary Detector:               | 2617                |
| Primary Detector Serial Number: | 77871-X080          |

| Element | Line Type | Apparent Concentration | k Ratio | Wt%   | Wt% Sigma | Atomic % | Standard Label | Factory Standard | Standard Calibration Date |
|---------|-----------|------------------------|---------|-------|-----------|----------|----------------|------------------|---------------------------|
| C       | K series  | 14.83                  | 0.14833 | 55.20 | 0.84      | 61.84    | C Vit          | Yes              |                           |
| N       | K series  | 4.83                   | 0.00860 | 15.16 | 1.09      | 14.56    | BN             | Yes              |                           |
| O       | K         | 6.65                   | 0.0223  | 26.60 | 0.54      | 22.37    | SiO2           | Yes              |                           |

|        |          |      |         |        |      |        |                  |     |  |
|--------|----------|------|---------|--------|------|--------|------------------|-----|--|
|        | series   |      | 8       |        |      |        |                  |     |  |
| Na     | K series | 0.52 | 0.00221 | 1.03   | 0.06 | 0.60   | Albite           | Yes |  |
| Si     | K series | 0.09 | 0.00073 | 0.21   | 0.03 | 0.10   | SiO <sub>2</sub> | Yes |  |
| P      | K series | 0.11 | 0.00060 | 0.17   | 0.03 | 0.07   | GaP              | Yes |  |
| S      | K series | 0.05 | 0.00046 | 0.12   | 0.03 | 0.05   | FeS <sub>2</sub> | Yes |  |
| Cl     | K series | 0.24 | 0.00214 | 0.59   | 0.04 | 0.22   | NaCl             | Yes |  |
| K      | K series | 0.04 | 0.00037 | 0.10   | 0.03 | 0.03   | KBr              | Yes |  |
| Br     | L series | 0.28 | 0.00250 | 0.82   | 0.08 | 0.14   | KBr              | Yes |  |
| Total: |          |      |         | 100.00 |      | 100.00 |                  |     |  |

Electron Image 17

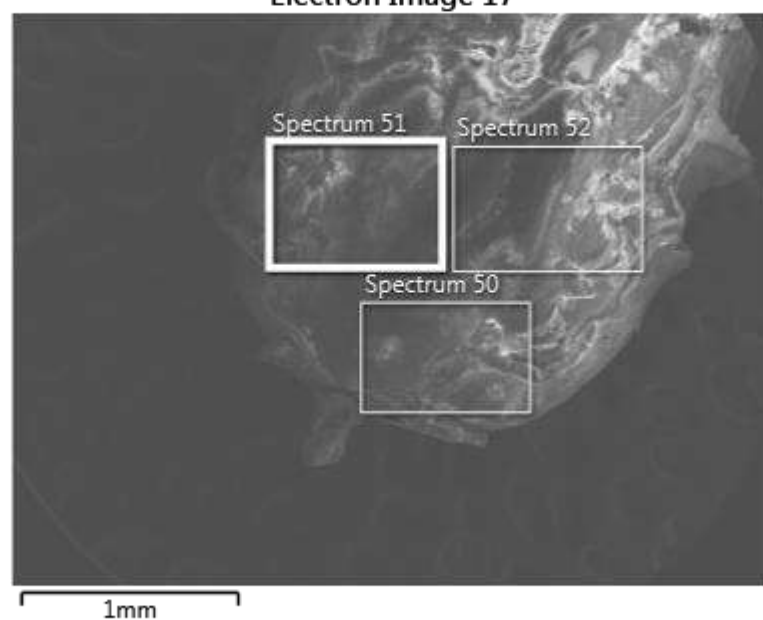

23/01/2020 10:19:11

Project 1

Rumania 4

Pecho 1 15 Kv

Electron Image 17

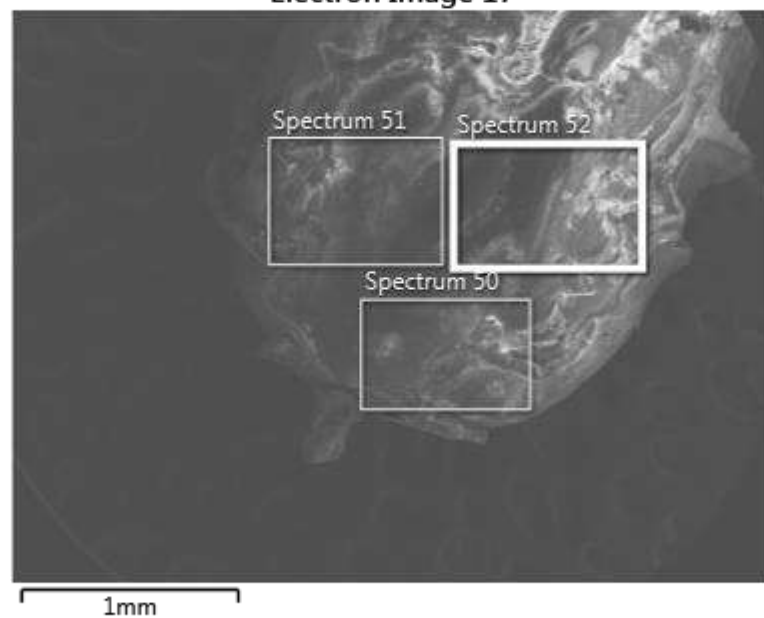

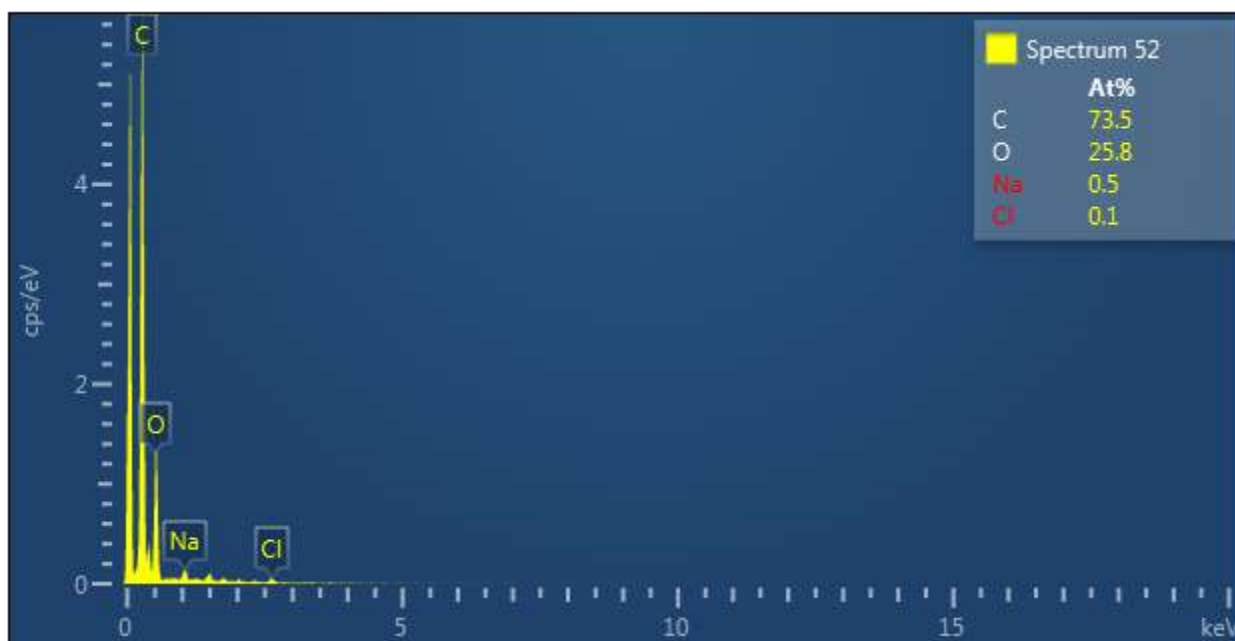

|                                 |                     |
|---------------------------------|---------------------|
| Label:                          | Spectrum 52         |
| Source:                         | Acquired            |
| Created:                        | 23/01/2020 10:19:11 |
| Livetime:                       | 60.0s               |
| Process Time:                   | 4                   |
| Accelerating Voltage:           | 15.00kV             |
| Magnification:                  | 32 x                |
| Working Distance:               | 10.0mm              |
| Specimen Tilt (degrees):        | 0.0                 |
| Elevation (degrees):            | 35.0                |
| Azimuth (degrees):              | 0.0                 |
| Number Of Channels:             | 2048                |
| Energy Range (keV):             | 20 keV              |
| Energy per Channel (eV):        | 10.0eV              |
| Detector Type Id:               | 29                  |
| Detector Type:                  | X-Max               |
| Window Type:                    | SATW                |
| Pulse Pile Up Correction:       | Succeeded           |
| Primary Detector:               | 2617                |
| Primary Detector Serial Number: | 77871-X080          |

| Element | Line Type | Apparent Concentration | k Ratio | Wt%   | Wt% Sigma | Atomic % | Standard Label | Factory Standard | Standard Calibration Date |
|---------|-----------|------------------------|---------|-------|-----------|----------|----------------|------------------|---------------------------|
| C       | K series  | 8.84                   | 0.08837 | 67.29 | 0.58      | 73.54    | C Vit          | Yes              |                           |
| O       | K series  | 3.93                   | 0.01321 | 31.49 | 0.58      | 25.84    | SiO2           | Yes              |                           |
| Na      | K         | 0.18                   | 0.0007  | 0.82  | 0.09      | 0.47     | Albite         | Yes              |                           |

|        |          |      |         |        |      |        |      |     |  |
|--------|----------|------|---------|--------|------|--------|------|-----|--|
|        | series   |      | 5       |        |      |        |      |     |  |
| Cl     | K series | 0.07 | 0.00063 | 0.40   | 0.06 | 0.15   | NaCl | Yes |  |
| Total: |          |      |         | 100.00 |      | 100.00 |      |     |  |

Electron Image 17

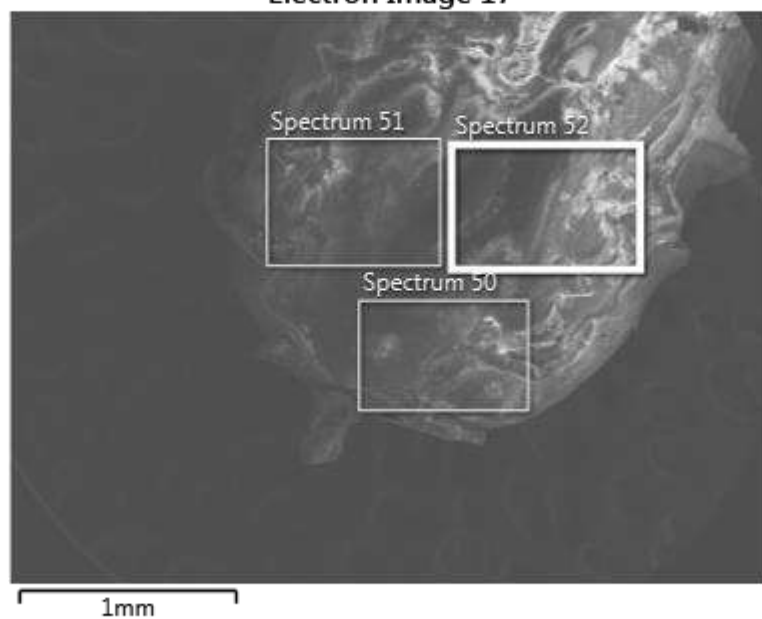

23/01/2020 10:28:16

Project 1

Rumania 4

Ventral 1 15 Kv

Electron Image 18

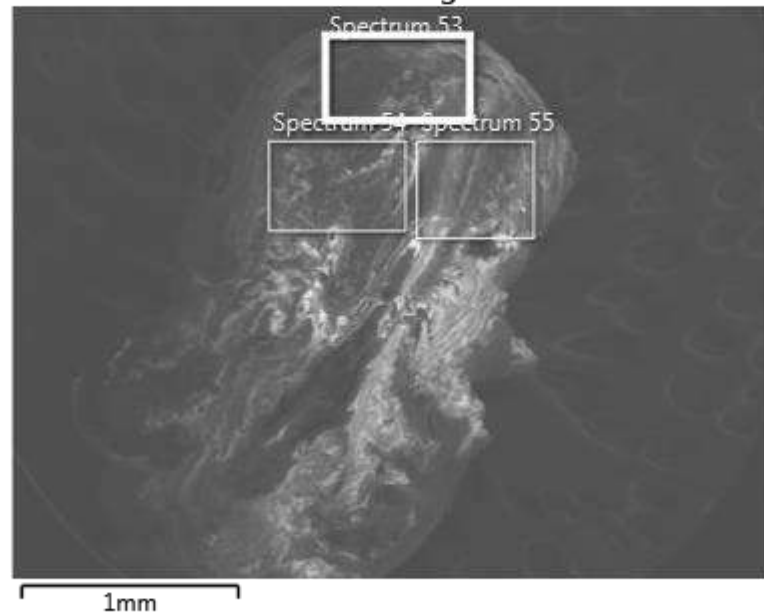

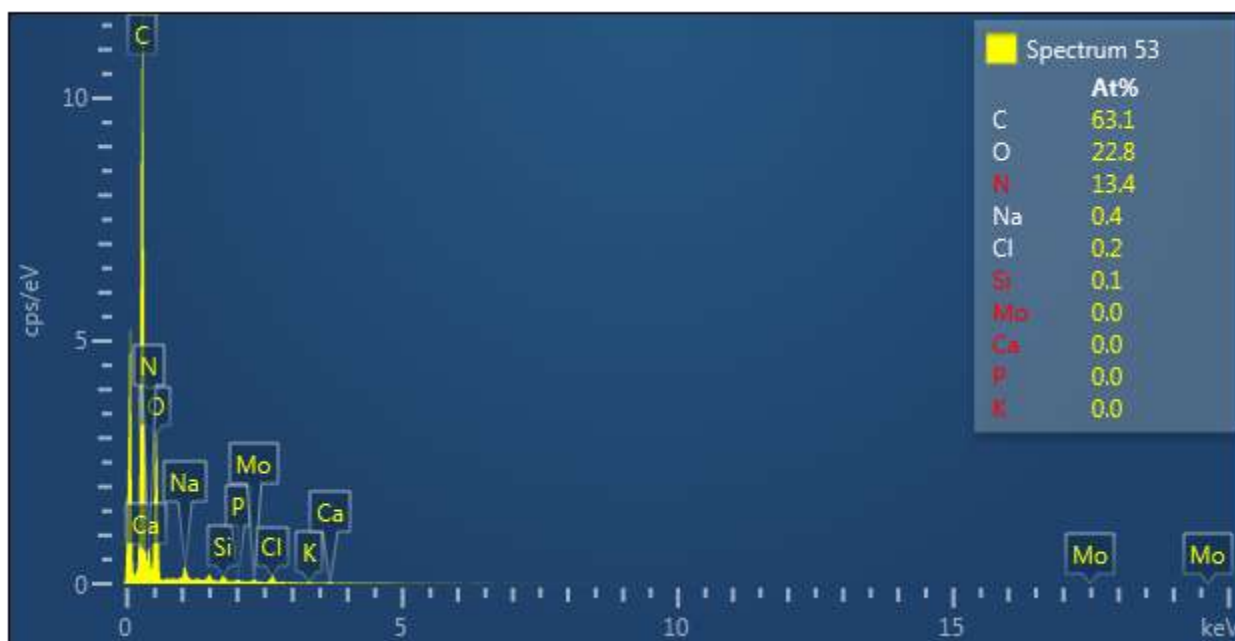

|                                 |                     |
|---------------------------------|---------------------|
| Label:                          | Spectrum 53         |
| Source:                         | Acquired            |
| Created:                        | 23/01/2020 10:28:16 |
| Livetime:                       | 60.3s               |
| Process Time:                   | 4                   |
| Accelerating Voltage:           | 15.00kV             |
| Magnification:                  | 32 x                |
| Working Distance:               | 10.0mm              |
| Specimen Tilt (degrees):        | 0.0                 |
| Elevation (degrees):            | 35.0                |
| Azimuth (degrees):              | 0.0                 |
| Number Of Channels:             | 2048                |
| Energy Range (keV):             | 20 keV              |
| Energy per Channel (eV):        | 10.0eV              |
| Detector Type Id:               | 29                  |
| Detector Type:                  | X-Max               |
| Window Type:                    | SATW                |
| Pulse Pile Up Correction:       | Succeeded           |
| Primary Detector:               | 2617                |
| Primary Detector Serial Number: | 77871-X080          |

| Element | Line Type | Apparent Concentration | k Ratio | Wt%   | Wt% Sigma | Atomic % | Standard Label | Factory Standard | Standard Calibration Date |
|---------|-----------|------------------------|---------|-------|-----------|----------|----------------|------------------|---------------------------|
| C       | K series  | 21.50                  | 0.21498 | 56.78 | 1.00      | 63.07    | C Vit          | Yes              |                           |
| N       | K series  | 5.69                   | 0.01012 | 14.02 | 1.38      | 13.36    | BN             | Yes              |                           |
| O       | K         | 8.92                   | 0.0300  | 27.32 | 0.58      | 22.79    | SiO2           | Yes              |                           |



|        |          |      |         |        |      |        |                  |     |  |
|--------|----------|------|---------|--------|------|--------|------------------|-----|--|
|        | series   |      | 1       |        |      |        |                  |     |  |
| Na     | K series | 0.43 | 0.00180 | 0.65   | 0.05 | 0.38   | Albite           | Yes |  |
| Si     | K series | 0.14 | 0.00108 | 0.24   | 0.03 | 0.11   | SiO <sub>2</sub> | Yes |  |
| P      | K series | 0.07 | 0.00037 | 0.08   | 0.03 | 0.03   | GaP              | Yes |  |
| Cl     | K series | 0.22 | 0.00193 | 0.41   | 0.03 | 0.15   | NaCl             | Yes |  |
| K      | K series | 0.05 | 0.00039 | 0.08   | 0.03 | 0.03   | KBr              | Yes |  |
| Ca     | K series | 0.06 | 0.00053 | 0.11   | 0.03 | 0.04   | Wollastonite     | Yes |  |
| Mo     | L series | 0.14 | 0.00136 | 0.31   | 0.08 | 0.04   | Mo               | Yes |  |
| Total: |          |      |         | 100.00 |      | 100.00 |                  |     |  |

Electron Image 18

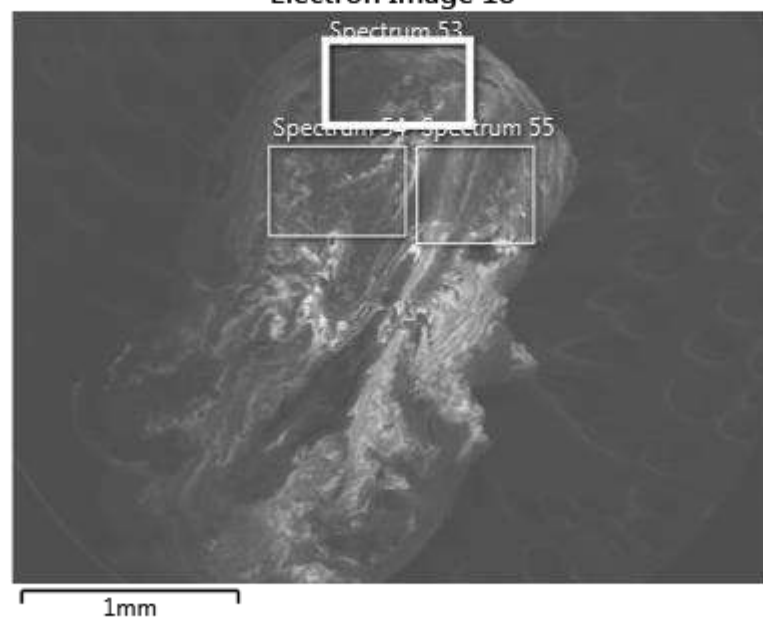

23/01/2020 10:29:27

Project 1

Rumania 4

Ventral 1 15 Kv

Electron Image 18

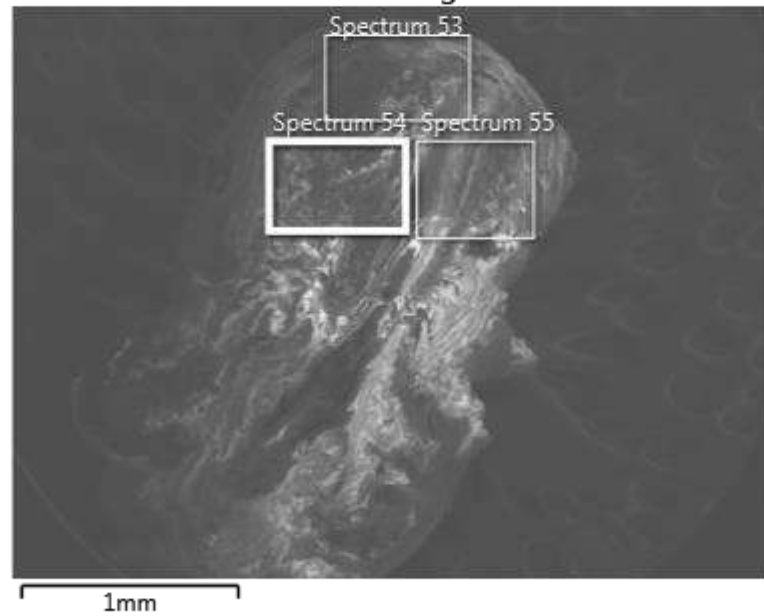

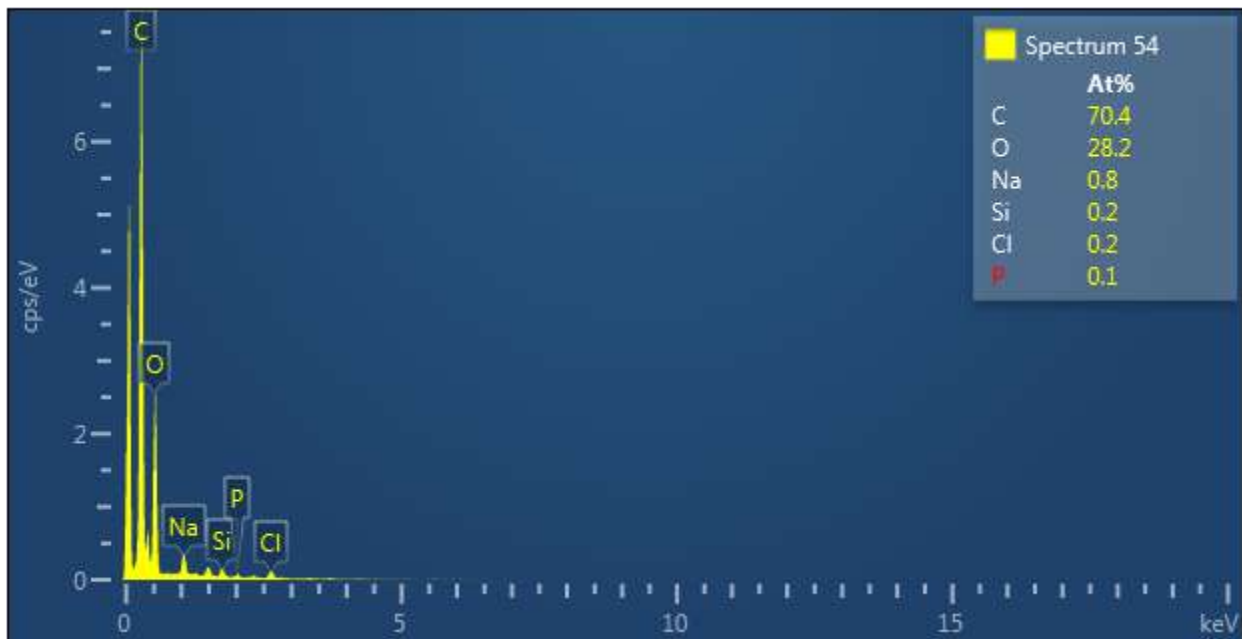

|                                 |                     |
|---------------------------------|---------------------|
| Label:                          | Spectrum 54         |
| Source:                         | Acquired            |
| Created:                        | 23/01/2020 10:29:27 |
| Livetime:                       | 60.2s               |
| Process Time:                   | 4                   |
| Accelerating Voltage:           | 15.00kV             |
| Magnification:                  | 32 x                |
| Working Distance:               | 10.0mm              |
| Specimen Tilt (degrees):        | 0.0                 |
| Elevation (degrees):            | 35.0                |
| Azimuth (degrees):              | 0.0                 |
| Number Of Channels:             | 2048                |
| Energy Range (keV):             | 20 keV              |
| Energy per Channel (eV):        | 10.0eV              |
| Detector Type Id:               | 29                  |
| Detector Type:                  | X-Max               |
| Window Type:                    | SATW                |
| Pulse Pile Up Correction:       | Succeeded           |
| Primary Detector:               | 2617                |
| Primary Detector Serial Number: | 77871-X080          |

| Element | Line Type | Apparent Concentration | k Ratio | Wt%   | Wt% Sigma | Atomic % | Standard Label | Factory Standard | Standard Calibration Date |
|---------|-----------|------------------------|---------|-------|-----------|----------|----------------|------------------|---------------------------|
| C       | K series  | 12.06                  | 0.12056 | 63.41 | 0.46      | 70.39    | C Vit          | Yes              |                           |
| O       | K series  | 7.17                   | 0.02412 | 33.88 | 0.46      | 28.24    | SiO2           | Yes              |                           |
| Na      | K         | 0.51                   | 0.0021  | 1.46  | 0.09      | 0.85     | Albite         | Yes              |                           |

|        |          |      |         |        |      |        |                  |     |  |
|--------|----------|------|---------|--------|------|--------|------------------|-----|--|
|        | series   |      | 7       |        |      |        |                  |     |  |
| Si     | K series | 0.14 | 0.00112 | 0.46   | 0.05 | 0.22   | SiO <sub>2</sub> | Yes |  |
| P      | K series | 0.09 | 0.00052 | 0.21   | 0.04 | 0.09   | GaP              | Yes |  |
| Cl     | K series | 0.17 | 0.00146 | 0.58   | 0.05 | 0.22   | NaCl             | Yes |  |
| Total: |          |      |         | 100.00 |      | 100.00 |                  |     |  |

Electron Image 18

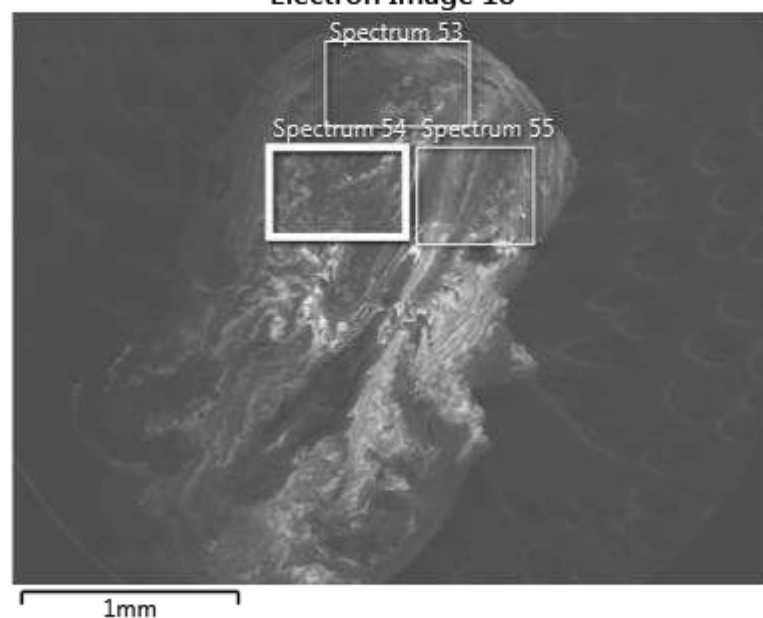

23/01/2020 10:30:37

Project 1

Rumania 4

Ventral 1 15 Kv

Electron Image 18

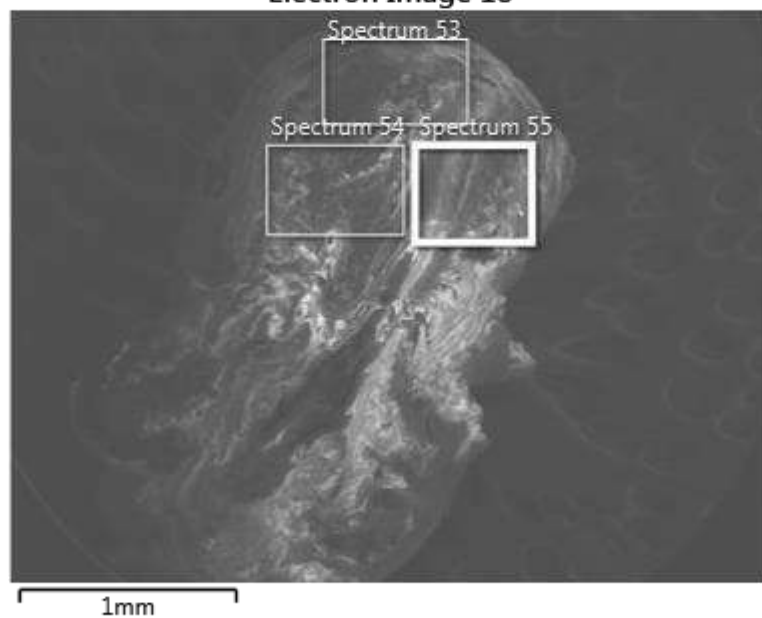

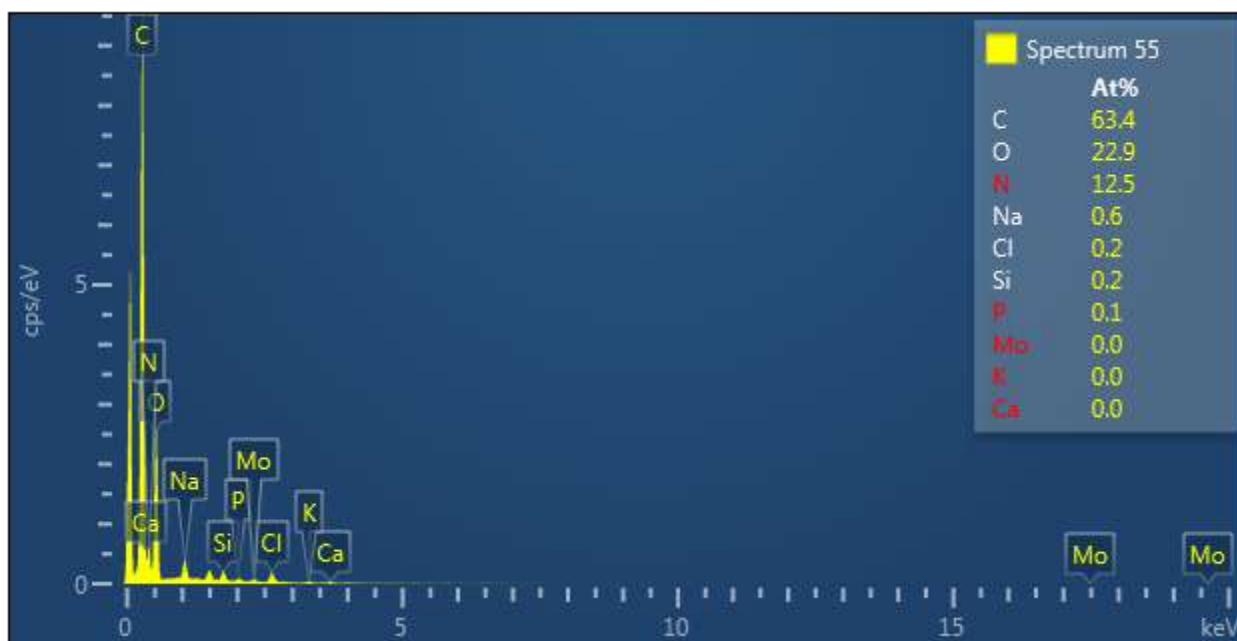

|                                 |                     |
|---------------------------------|---------------------|
| Label:                          | Spectrum 55         |
| Source:                         | Acquired            |
| Created:                        | 23/01/2020 10:30:37 |
| Livetime:                       | 60.4s               |
| Process Time:                   | 4                   |
| Accelerating Voltage:           | 15.00kV             |
| Magnification:                  | 32 x                |
| Working Distance:               | 10.0mm              |
| Specimen Tilt (degrees):        | 0.0                 |
| Elevation (degrees):            | 35.0                |
| Azimuth (degrees):              | 0.0                 |
| Number Of Channels:             | 2048                |
| Energy Range (keV):             | 20 keV              |
| Energy per Channel (eV):        | 10.0eV              |
| Detector Type Id:               | 29                  |
| Detector Type:                  | X-Max               |
| Window Type:                    | SATW                |
| Pulse Pile Up Correction:       | Succeeded           |
| Primary Detector:               | 2617                |
| Primary Detector Serial Number: | 77871-X080          |

| Element | Line Type | Apparent Concentration | k Ratio | Wt%   | Wt% Sigma | Atomic % | Standard Label | Factory Standard | Standard Calibration Date |
|---------|-----------|------------------------|---------|-------|-----------|----------|----------------|------------------|---------------------------|
| C       | K series  | 17.25                  | 0.17250 | 56.88 | 1.10      | 63.41    | C Vit          | Yes              |                           |
| N       | K series  | 4.39                   | 0.00782 | 13.07 | 1.52      | 12.50    | BN             | Yes              |                           |
| O       | K         | 7.57                   | 0.0254  | 27.38 | 0.64      | 22.92    | SiO2           | Yes              |                           |

|        |          |      |         |        |      |        |                  |     |  |
|--------|----------|------|---------|--------|------|--------|------------------|-----|--|
|        | series   |      | 7       |        |      |        |                  |     |  |
| Na     | K series | 0.54 | 0.00228 | 0.98   | 0.06 | 0.57   | Albite           | Yes |  |
| Si     | K series | 0.20 | 0.00159 | 0.42   | 0.03 | 0.20   | SiO <sub>2</sub> | Yes |  |
| P      | K series | 0.09 | 0.00050 | 0.13   | 0.03 | 0.06   | GaP              | Yes |  |
| Cl     | K series | 0.27 | 0.00232 | 0.58   | 0.04 | 0.22   | NaCl             | Yes |  |
| K      | K series | 0.05 | 0.00046 | 0.12   | 0.03 | 0.04   | KBr              | Yes |  |
| Ca     | K series | 0.05 | 0.00047 | 0.11   | 0.03 | 0.04   | Wollastonite     | Yes |  |
| Mo     | L series | 0.12 | 0.00122 | 0.33   | 0.09 | 0.05   | Mo               | Yes |  |
| Total: |          |      |         | 100.00 |      | 100.00 |                  |     |  |

Electron Image 18

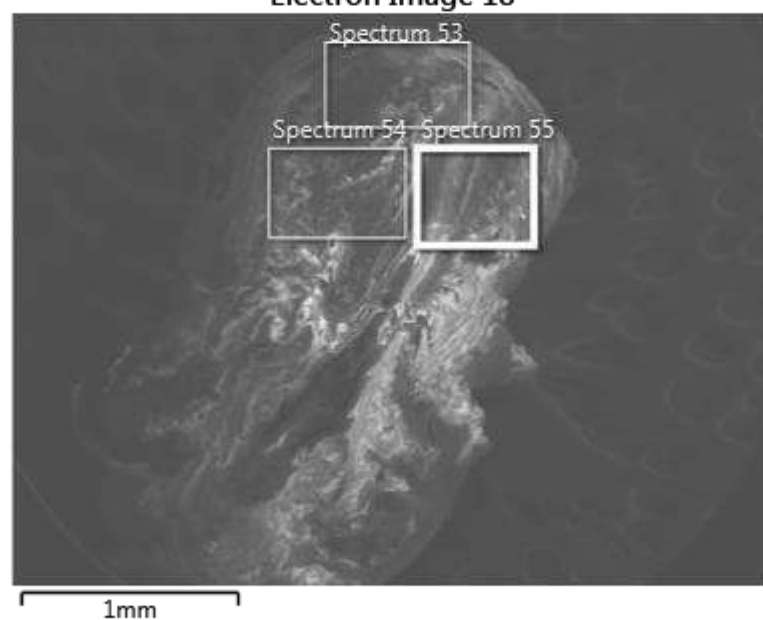

23/01/2020 12:21:35

Project 1

Rumania 5

Pecho 1 15 Kv

Electron Image 19

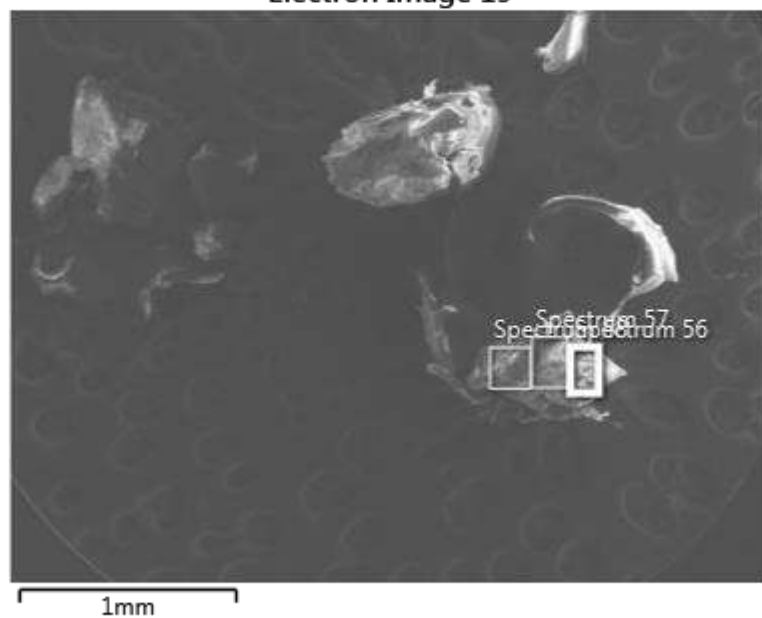



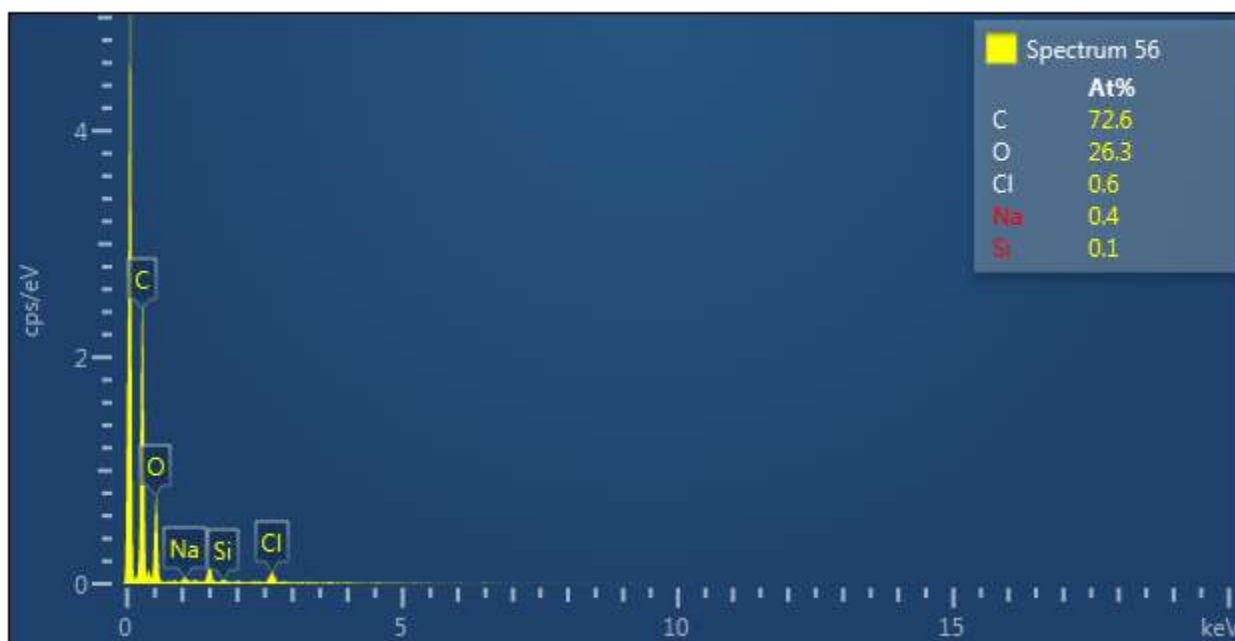

|                                 |                     |
|---------------------------------|---------------------|
| Label:                          | Spectrum 56         |
| Source:                         | Acquired            |
| Created:                        | 23/01/2020 12:21:35 |
| Livetime:                       | 60.1s               |
| Process Time:                   | 4                   |
| Accelerating Voltage:           | 15.00kV             |
| Magnification:                  | 32 x                |
| Working Distance:               | 10.0mm              |
| Specimen Tilt (degrees):        | 0.0                 |
| Elevation (degrees):            | 35.0                |
| Azimuth (degrees):              | 0.0                 |
| Number Of Channels:             | 2048                |
| Energy Range (keV):             | 20 keV              |
| Energy per Channel (eV):        | 10.0eV              |
| Detector Type Id:               | 29                  |
| Detector Type:                  | X-Max               |
| Window Type:                    | SATW                |
| Pulse Pile Up Correction:       | Succeeded           |
| Primary Detector:               | 2617                |
| Primary Detector Serial Number: | 77871-X080          |

| Element | Line Type | Apparent Concentration | k Ratio | Wt%   | Wt% Sigma | Atomic % | Standard Label | Factory Standard | Standard Calibration Date |
|---------|-----------|------------------------|---------|-------|-----------|----------|----------------|------------------|---------------------------|
| C       | K series  | 4.02                   | 0.04016 | 65.71 | 0.79      | 72.58    | C Vit          | Yes              |                           |
| O       | K series  | 2.17                   | 0.00731 | 31.71 | 0.78      | 26.30    | SiO2           | Yes              |                           |
| Na      | K         | 0.07                   | 0.0003  | 0.62  | 0.12      | 0.36     | Albite         | Yes              |                           |

|        |          |      |         |        |      |        |      |     |  |
|--------|----------|------|---------|--------|------|--------|------|-----|--|
|        | series   |      | 2       |        |      |        |      |     |  |
| Si     | K series | 0.03 | 0.00025 | 0.31   | 0.07 | 0.15   | SiO2 | Yes |  |
| Cl     | K series | 0.16 | 0.00142 | 1.65   | 0.14 | 0.62   | NaCl | Yes |  |
| Total: |          |      |         | 100.00 |      | 100.00 |      |     |  |

Electron Image 19

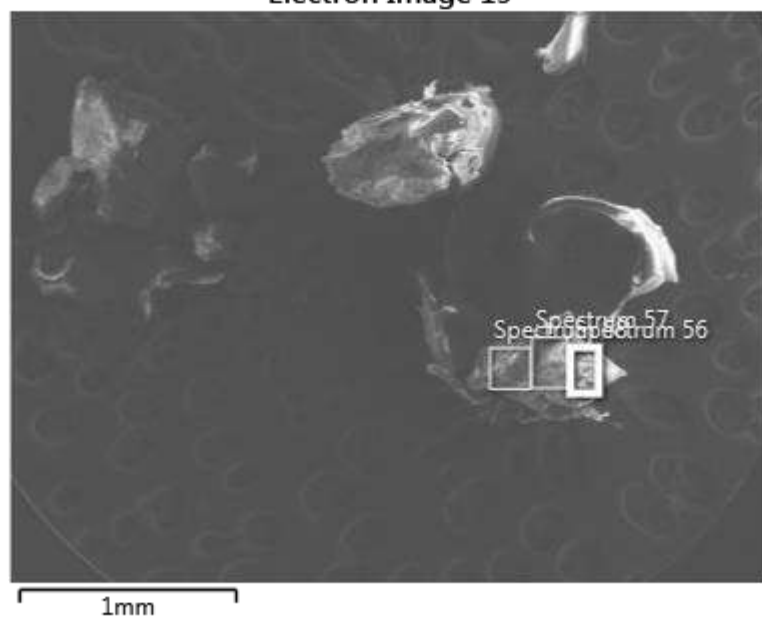

23/01/2020 12:22:43

Project 1

Rumania 5

Pecho 1 15 Kv

Electron Image 19

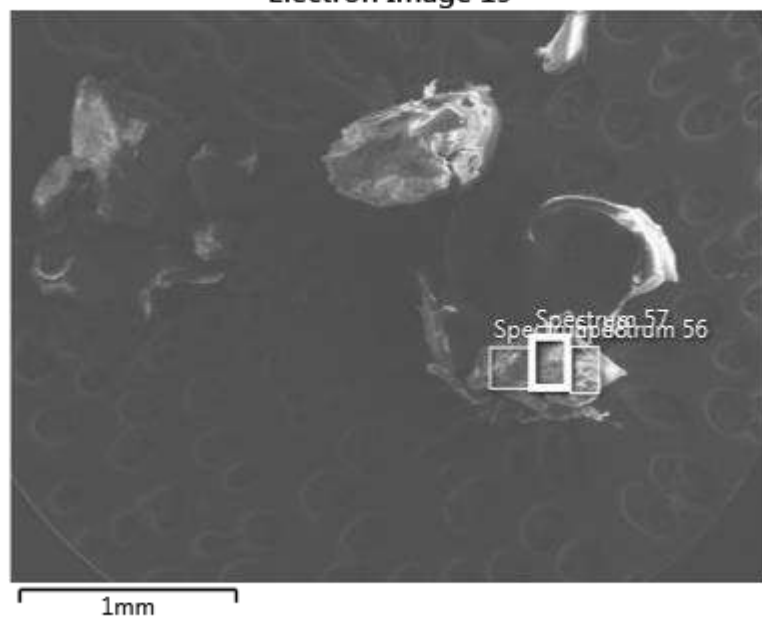

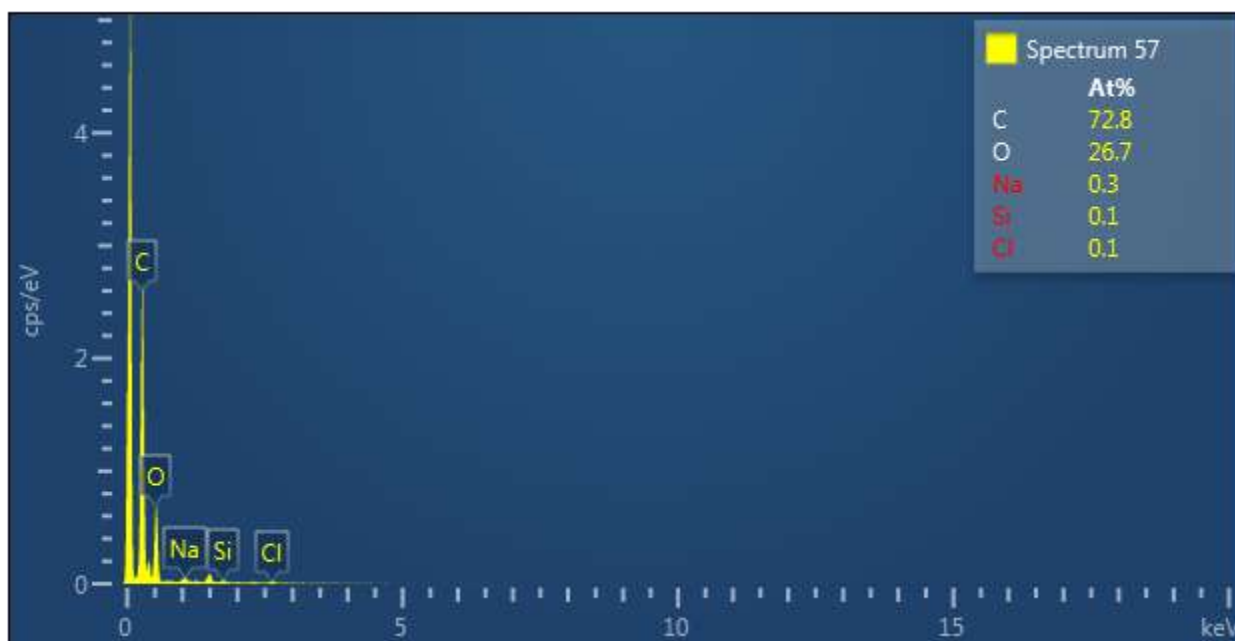

|                                 |                     |
|---------------------------------|---------------------|
| Label:                          | Spectrum 57         |
| Source:                         | Acquired            |
| Created:                        | 23/01/2020 12:22:43 |
| Livetime:                       | 60.1s               |
| Process Time:                   | 4                   |
| Accelerating Voltage:           | 15.00kV             |
| Magnification:                  | 32 x                |
| Working Distance:               | 10.0mm              |
| Specimen Tilt (degrees):        | 0.0                 |
| Elevation (degrees):            | 35.0                |
| Azimuth (degrees):              | 0.0                 |
| Number Of Channels:             | 2048                |
| Energy Range (keV):             | 20 keV              |
| Energy per Channel (eV):        | 10.0eV              |
| Detector Type Id:               | 29                  |
| Detector Type:                  | X-Max               |
| Window Type:                    | SATW                |
| Pulse Pile Up Correction:       | Succeeded           |
| Primary Detector:               | 2617                |
| Primary Detector Serial Number: | 77871-X080          |

| Element | Line Type | Apparent Concentration | k Ratio | Wt%   | Wt% Sigma | Atomic % | Standard Label | Factory Standard | Standard Calibration Date |
|---------|-----------|------------------------|---------|-------|-----------|----------|----------------|------------------|---------------------------|
| C       | K series  | 4.20                   | 0.04195 | 66.46 | 0.84      | 72.79    | C Vit          | Yes              |                           |
| O       | K series  | 1.99                   | 0.00669 | 32.44 | 0.83      | 26.67    | SiO2           | Yes              |                           |
| Na      | K         | 0.05                   | 0.0002  | 0.48  | 0.13      | 0.28     | Albite         | Yes              |                           |

|        |          |      |         |        |      |        |                  |     |  |
|--------|----------|------|---------|--------|------|--------|------------------|-----|--|
|        | series   |      | 1       |        |      |        |                  |     |  |
| Si     | K series | 0.03 | 0.00021 | 0.28   | 0.08 | 0.13   | SiO <sub>2</sub> | Yes |  |
| Cl     | K series | 0.03 | 0.00026 | 0.34   | 0.09 | 0.13   | NaCl             | Yes |  |
| Total: |          |      |         | 100.00 |      | 100.00 |                  |     |  |

Electron Image 19

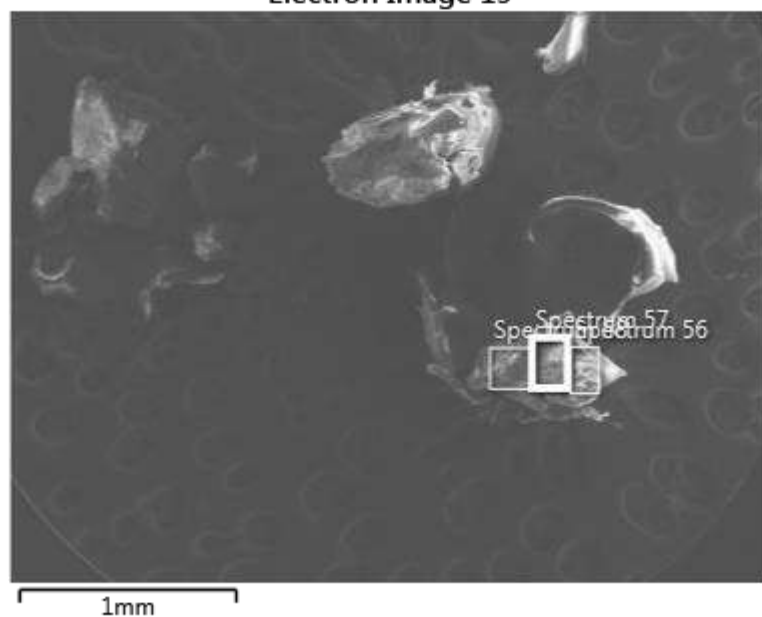

23/01/2020 12:23:52

Project 1

Rumania 5

Pecho 1 15 Kv

Electron Image 19

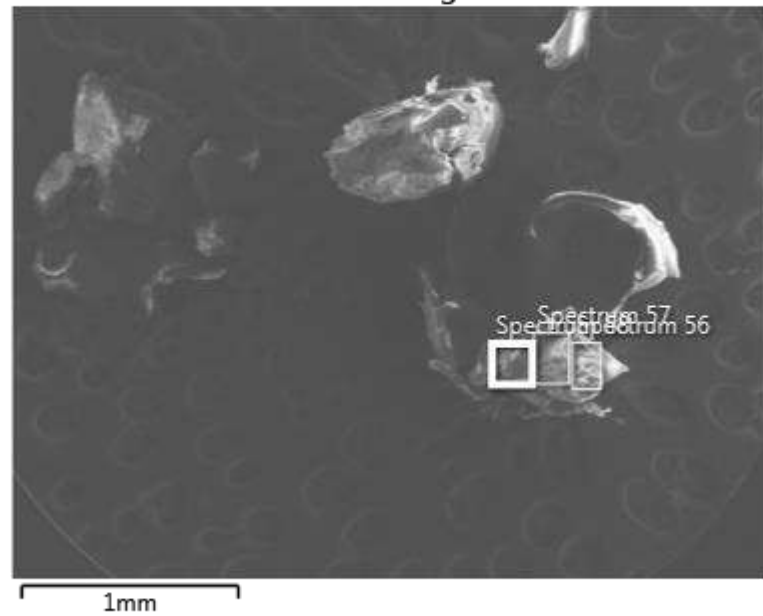

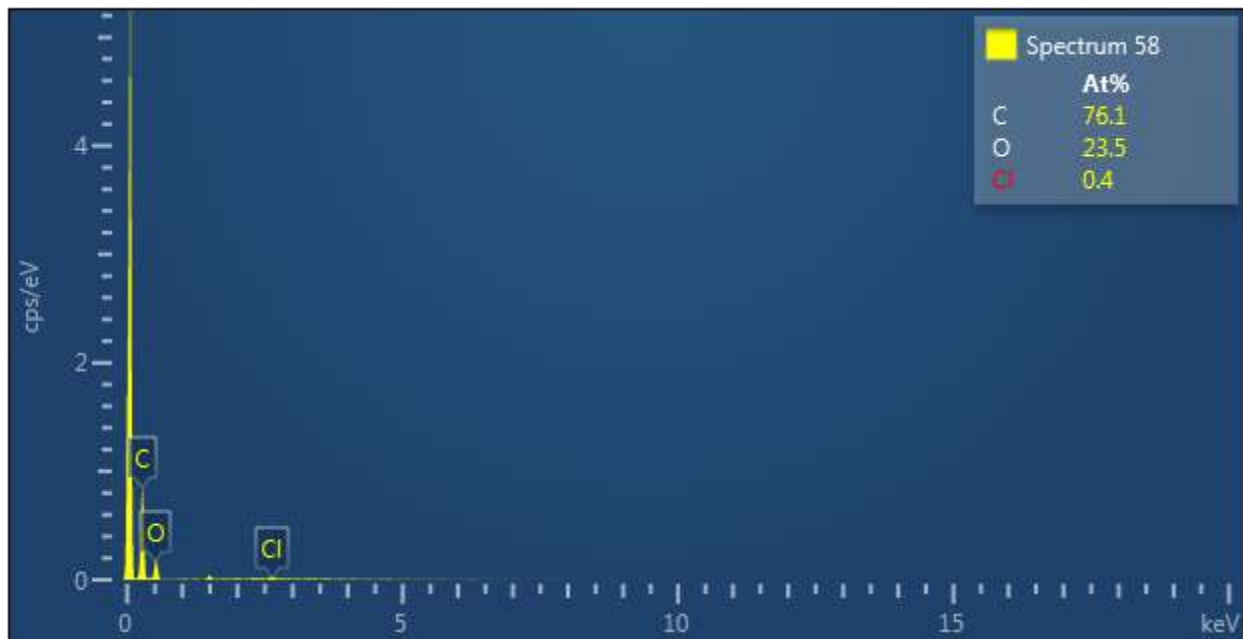

|                                 |                     |
|---------------------------------|---------------------|
| Label:                          | Spectrum 58         |
| Source:                         | Acquired            |
| Created:                        | 23/01/2020 12:23:52 |
| Livetime:                       | 60.1s               |
| Process Time:                   | 4                   |
| Accelerating Voltage:           | 15.00kV             |
| Magnification:                  | 32 x                |
| Working Distance:               | 10.0mm              |
| Specimen Tilt (degrees):        | 0.0                 |
| Elevation (degrees):            | 35.0                |
| Azimuth (degrees):              | 0.0                 |
| Number Of Channels:             | 2048                |
| Energy Range (keV):             | 20 keV              |
| Energy per Channel (eV):        | 10.0eV              |
| Detector Type Id:               | 29                  |
| Detector Type:                  | X-Max               |
| Window Type:                    | SATW                |
| Pulse Pile Up Correction:       | Succeeded           |
| Primary Detector:               | 2617                |
| Primary Detector Serial Number: | 77871-X080          |

| Element | Line Type | Apparent Concentration | k Ratio | Wt%   | Wt% Sigma | Atomic % | Standard Label | Factory Standard | Standard Calibration Date |
|---------|-----------|------------------------|---------|-------|-----------|----------|----------------|------------------|---------------------------|
| C       | K series  | 1.39                   | 0.01393 | 70.04 | 1.41      | 76.06    | C Vit          | Yes              |                           |
| O       | K series  | 0.54                   | 0.00181 | 28.88 | 1.40      | 23.55    | SiO2           | Yes              |                           |
| Cl      | K         | 0.03                   | 0.0002  | 1.08  | 0.30      | 0.40     | NaCl           | Yes              |                           |

|        |        |  |   |        |  |        |  |  |  |
|--------|--------|--|---|--------|--|--------|--|--|--|
|        | series |  | 7 |        |  |        |  |  |  |
| Total: |        |  |   | 100.00 |  | 100.00 |  |  |  |

Electron Image 19

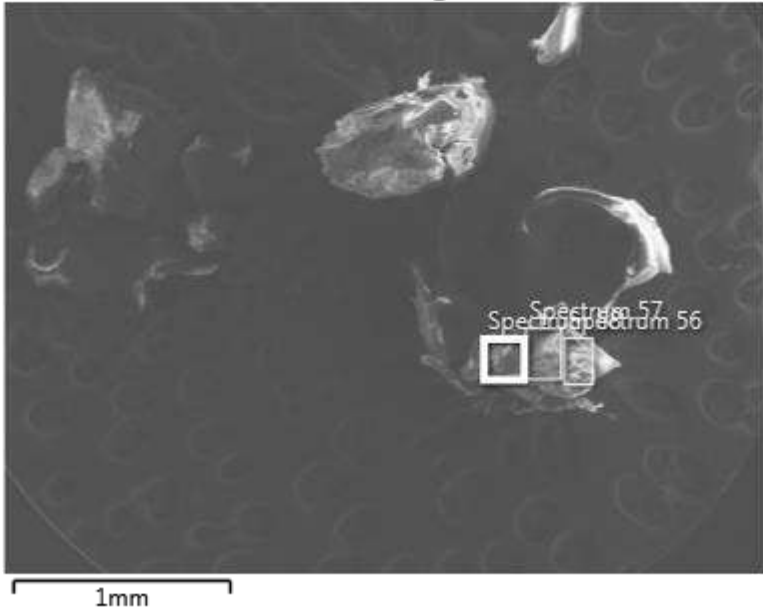



23/01/2020 12:25:45

Project 1

Rumania 5

Ventral 1 15 Kv

Electron Image 20

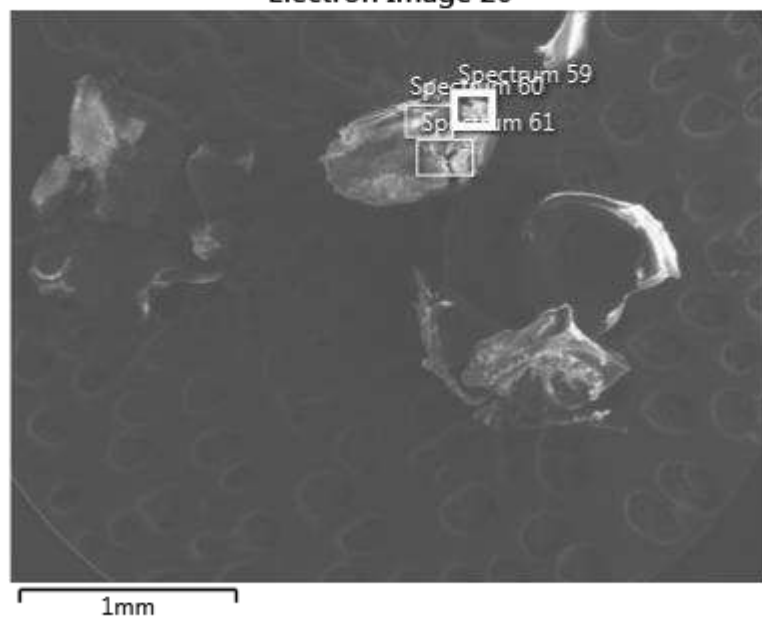

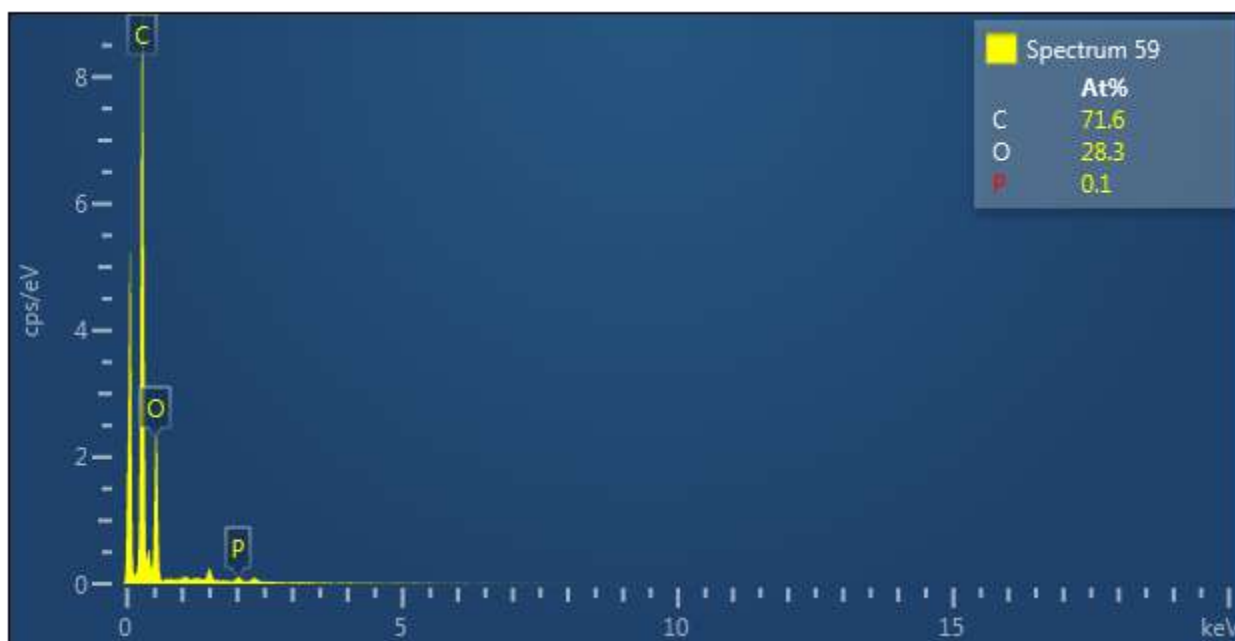

|                                 |                     |
|---------------------------------|---------------------|
| Label:                          | Spectrum 59         |
| Source:                         | Acquired            |
| Created:                        | 23/01/2020 12:25:45 |
| Livetime:                       | 60.1s               |
| Process Time:                   | 4                   |
| Accelerating Voltage:           | 15.00kV             |
| Magnification:                  | 32 x                |
| Working Distance:               | 10.0mm              |
| Specimen Tilt (degrees):        | 0.0                 |
| Elevation (degrees):            | 35.0                |
| Azimuth (degrees):              | 0.0                 |
| Number Of Channels:             | 2048                |
| Energy Range (keV):             | 20 keV              |
| Energy per Channel (eV):        | 10.0eV              |
| Detector Type Id:               | 29                  |
| Detector Type:                  | X-Max               |
| Window Type:                    | SATW                |
| Pulse Pile Up Correction:       | Succeeded           |
| Primary Detector:               | 2617                |
| Primary Detector Serial Number: | 77871-X080          |

| Element | Line Type | Apparent Concentration | k Ratio | Wt%   | Wt% Sigma | Atomic % | Standard Label | Factory Standard | Standard Calibration Date |
|---------|-----------|------------------------|---------|-------|-----------|----------|----------------|------------------|---------------------------|
| C       | K series  | 13.69                  | 0.13694 | 65.31 | 0.45      | 71.58    | C Vit          | Yes              |                           |
| O       | K series  | 6.92                   | 0.02330 | 34.36 | 0.45      | 28.27    | SiO2           | Yes              |                           |
| P       | K         | 0.14                   | 0.0008  | 0.34  | 0.05      | 0.14     | GaP            | Yes              |                           |

|        |        |  |   |        |  |        |  |  |  |
|--------|--------|--|---|--------|--|--------|--|--|--|
|        | series |  | 1 |        |  |        |  |  |  |
| Total: |        |  |   | 100.00 |  | 100.00 |  |  |  |

Electron Image 20

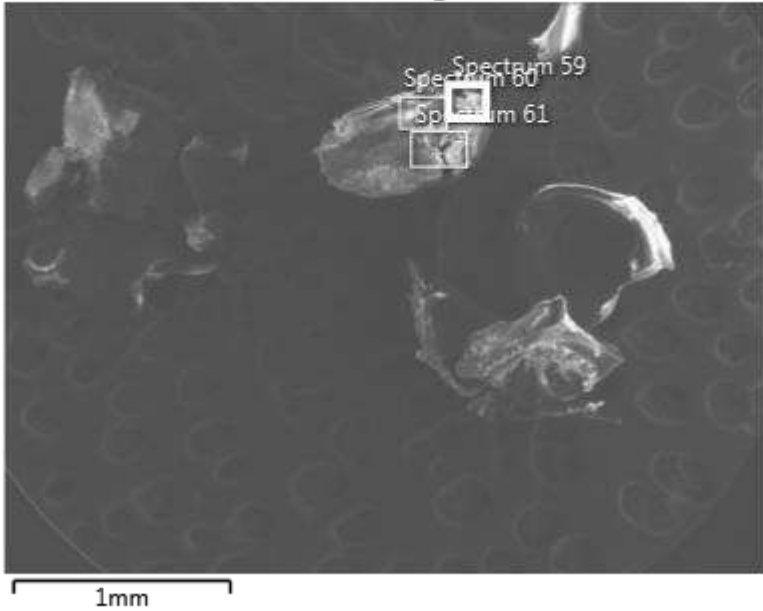

23/01/2020 12:26:53

Project 1

Rumania 5

Ventral 1 15 Kv

Electron Image 20

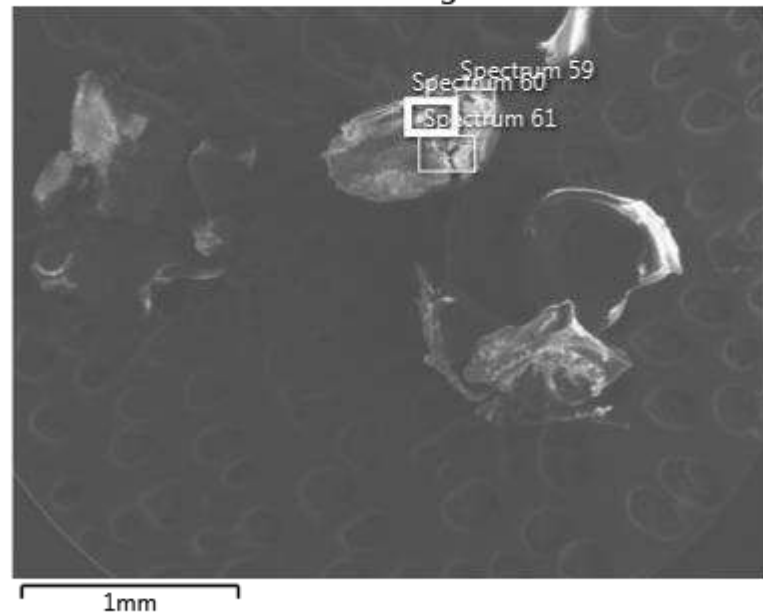

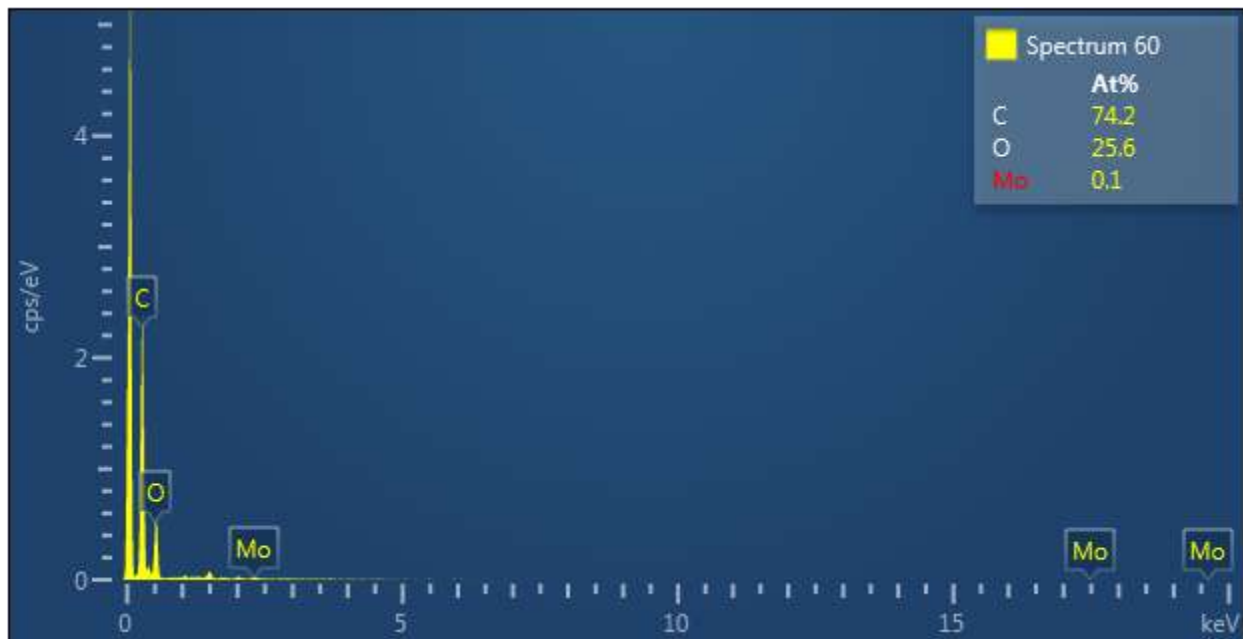

|                                 |                     |
|---------------------------------|---------------------|
| Label:                          | Spectrum 60         |
| Source:                         | Acquired            |
| Created:                        | 23/01/2020 12:26:53 |
| Livetime:                       | 60.2s               |
| Process Time:                   | 4                   |
| Accelerating Voltage:           | 15.00kV             |
| Magnification:                  | 32 x                |
| Working Distance:               | 10.0mm              |
| Specimen Tilt (degrees):        | 0.0                 |
| Elevation (degrees):            | 35.0                |
| Azimuth (degrees):              | 0.0                 |
| Number Of Channels:             | 2048                |
| Energy Range (keV):             | 20 keV              |
| Energy per Channel (eV):        | 10.0eV              |
| Detector Type Id:               | 29                  |
| Detector Type:                  | X-Max               |
| Window Type:                    | SATW                |
| Pulse Pile Up Correction:       | Succeeded           |
| Primary Detector:               | 2617                |
| Primary Detector Serial Number: | 77871-X080          |

| Element | Line Type | Apparent Concentration | k Ratio | Wt%   | Wt% Sigma | Atomic % | Standard Label | Factory Standard | Standard Calibration Date |
|---------|-----------|------------------------|---------|-------|-----------|----------|----------------|------------------|---------------------------|
| C       | K series  | 3.75                   | 0.03745 | 67.82 | 0.94      | 74.25    | C Vit          | Yes              |                           |
| O       | K series  | 1.56                   | 0.00526 | 31.16 | 0.92      | 25.61    | SiO2           | Yes              |                           |
| Mo      | L         | 0.06                   | 0.0006  | 1.02  | 0.29      | 0.14     | Mo             | Yes              |                           |

|        |        |  |   |        |  |        |  |  |  |
|--------|--------|--|---|--------|--|--------|--|--|--|
|        | series |  | 0 |        |  |        |  |  |  |
| Total: |        |  |   | 100.00 |  | 100.00 |  |  |  |

Electron Image 20

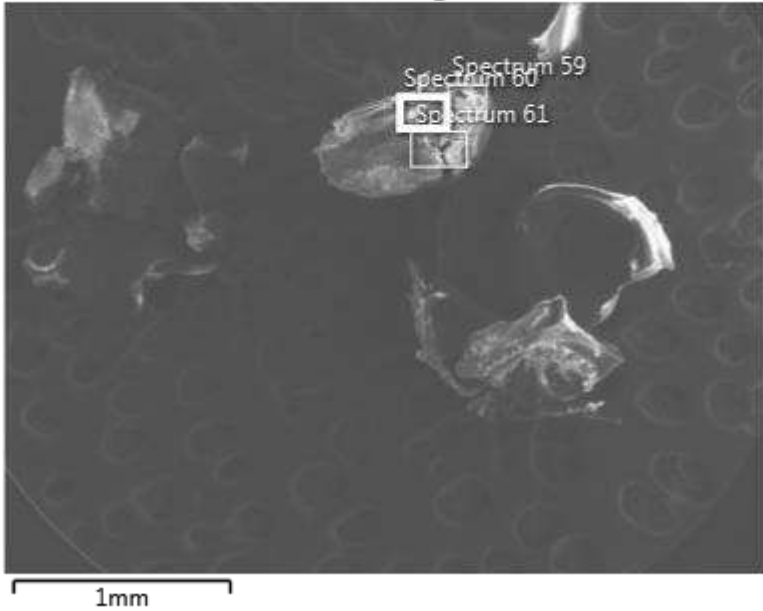

23/01/2020 12:28:00

Project 1

Rumania 5

Ventral 1 15 Kv

Electron Image 20

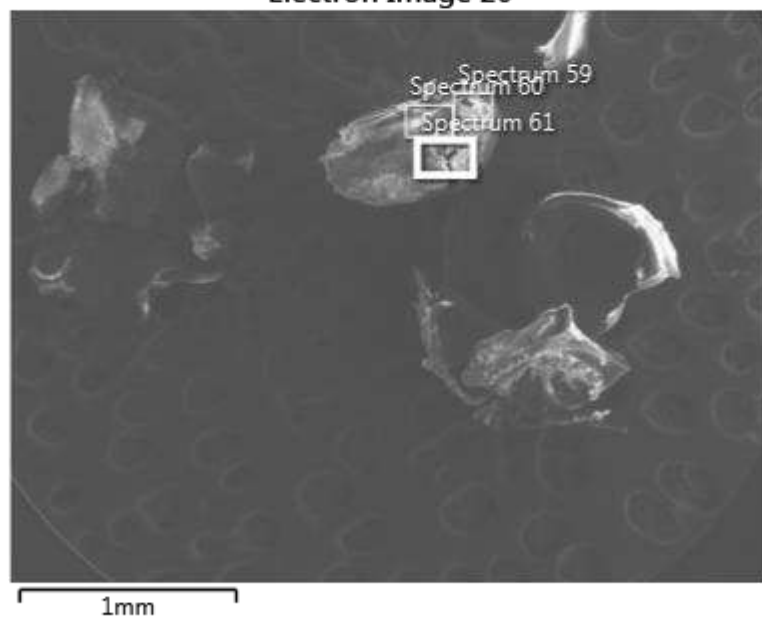

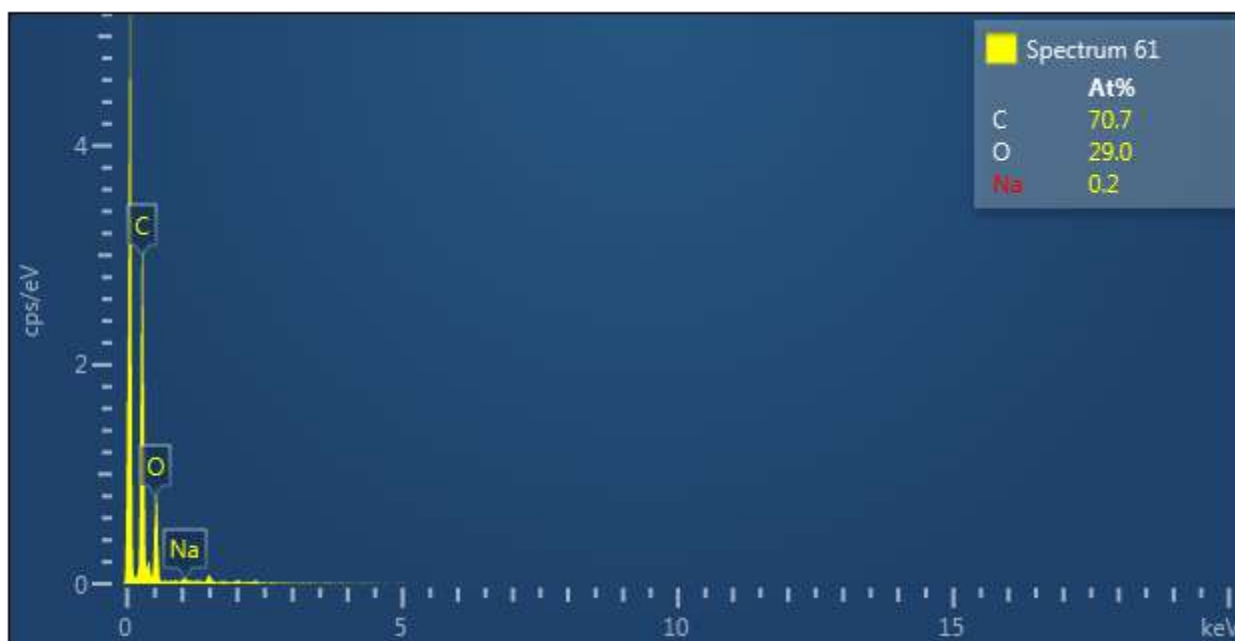

|                                 |                     |
|---------------------------------|---------------------|
| Label:                          | Spectrum 61         |
| Source:                         | Acquired            |
| Created:                        | 23/01/2020 12:28:00 |
| Livetime:                       | 60.0s               |
| Process Time:                   | 4                   |
| Accelerating Voltage:           | 15.00kV             |
| Magnification:                  | 32 x                |
| Working Distance:               | 10.0mm              |
| Specimen Tilt (degrees):        | 0.0                 |
| Elevation (degrees):            | 35.0                |
| Azimuth (degrees):              | 0.0                 |
| Number Of Channels:             | 2048                |
| Energy Range (keV):             | 20 keV              |
| Energy per Channel (eV):        | 10.0eV              |
| Detector Type Id:               | 29                  |
| Detector Type:                  | X-Max               |
| Window Type:                    | SATW                |
| Pulse Pile Up Correction:       | Succeeded           |
| Primary Detector:               | 2617                |
| Primary Detector Serial Number: | 77871-X080          |

| Element | Line Type | Apparent Concentration | k Ratio | Wt%   | Wt% Sigma | Atomic % | Standard Label | Factory Standard | Standard Calibration Date |
|---------|-----------|------------------------|---------|-------|-----------|----------|----------------|------------------|---------------------------|
| C       | K series  | 4.72                   | 0.04724 | 64.37 | 0.76      | 70.72    | C Vit          | Yes              |                           |
| O       | K series  | 2.50                   | 0.00841 | 35.21 | 0.76      | 29.04    | SiO2           | Yes              |                           |
| Na      | K         | 0.05                   | 0.0002  | 0.42  | 0.12      | 0.24     | Albite         | Yes              |                           |



|        |        |  |   |        |  |        |  |  |  |
|--------|--------|--|---|--------|--|--------|--|--|--|
|        | series |  | 1 |        |  |        |  |  |  |
| Total: |        |  |   | 100.00 |  | 100.00 |  |  |  |

Electron Image 20

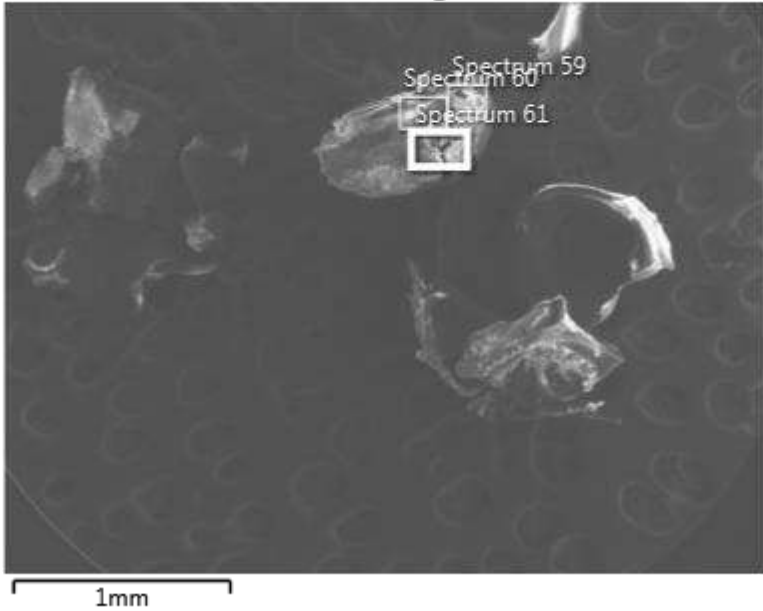

23/01/2020 12:30:19

Project 1

Rumania 6

Pecho 1 15 Kv

Electron Image 21

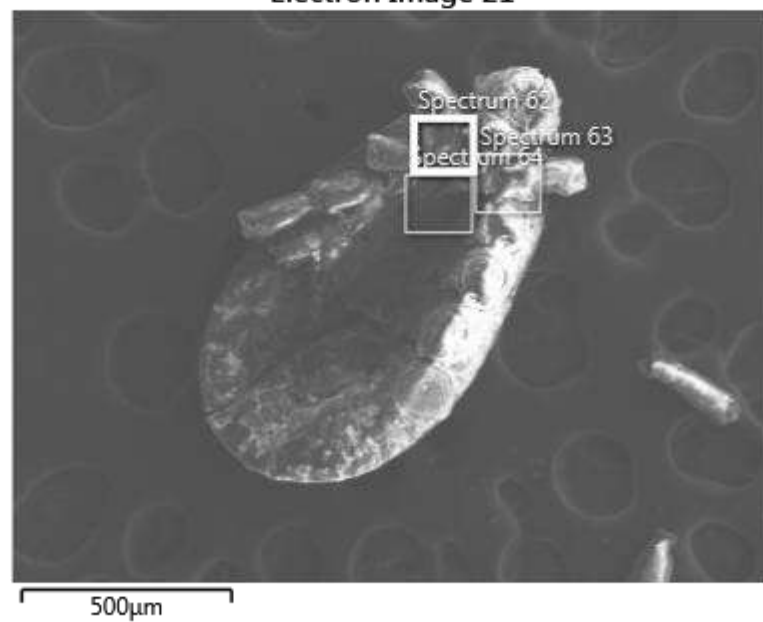

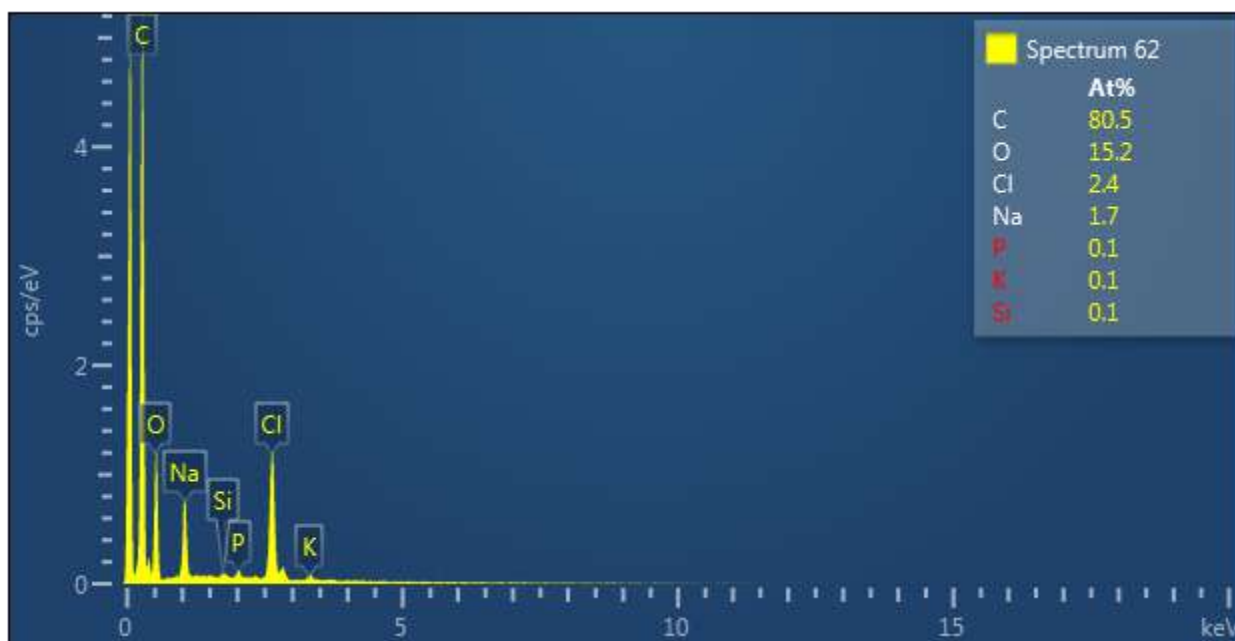

|                                 |                     |
|---------------------------------|---------------------|
| Label:                          | Spectrum 62         |
| Source:                         | Acquired            |
| Created:                        | 23/01/2020 12:30:19 |
| Livetime:                       | 60.3s               |
| Process Time:                   | 4                   |
| Accelerating Voltage:           | 15.00kV             |
| Magnification:                  | 62 x                |
| Working Distance:               | 10.0mm              |
| Specimen Tilt (degrees):        | 0.0                 |
| Elevation (degrees):            | 35.0                |
| Azimuth (degrees):              | 0.0                 |
| Number Of Channels:             | 2048                |
| Energy Range (keV):             | 20 keV              |
| Energy per Channel (eV):        | 10.0eV              |
| Detector Type Id:               | 29                  |
| Detector Type:                  | X-Max               |
| Window Type:                    | SATW                |
| Pulse Pile Up Correction:       | Succeeded           |
| Primary Detector:               | 2617                |
| Primary Detector Serial Number: | 77871-X080          |

| Element | Line Type | Apparent Concentration | k Ratio | Wt%   | Wt% Sigma | Atomic % | Standard Label | Factory Standard | Standard Calibration Date |
|---------|-----------|------------------------|---------|-------|-----------|----------|----------------|------------------|---------------------------|
| C       | K series  | 9.39                   | 0.09387 | 71.99 | 0.50      | 80.46    | C Vit          | Yes              |                           |
| O       | K series  | 3.45                   | 0.01162 | 18.06 | 0.44      | 15.15    | SiO2           | Yes              |                           |
| Na      | K         | 1.26                   | 0.0053  | 2.94  | 0.10      | 1.72     | Albite         | Yes              |                           |

|        |          |      |         |        |      |        |                  |     |  |
|--------|----------|------|---------|--------|------|--------|------------------|-----|--|
|        | series   |      | 3       |        |      |        |                  |     |  |
| Si     | K series | 0.04 | 0.00032 | 0.12   | 0.04 | 0.06   | SiO <sub>2</sub> | Yes |  |
| P      | K series | 0.15 | 0.00081 | 0.29   | 0.05 | 0.13   | GaP              | Yes |  |
| Cl     | K series | 2.07 | 0.01808 | 6.33   | 0.15 | 2.40   | NaCl             | Yes |  |
| K      | K series | 0.09 | 0.00079 | 0.28   | 0.06 | 0.10   | KBr              | Yes |  |
| Total: |          |      |         | 100.00 |      | 100.00 |                  |     |  |

Electron Image 21

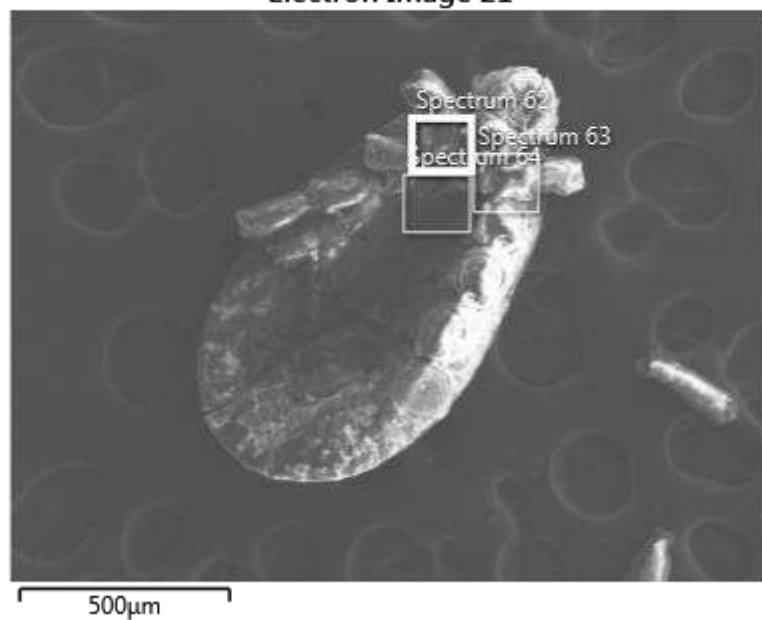

23/01/2020 12:31:30

Project 1

Rumania 6

Pecho 1 15 Kv

Electron Image 21

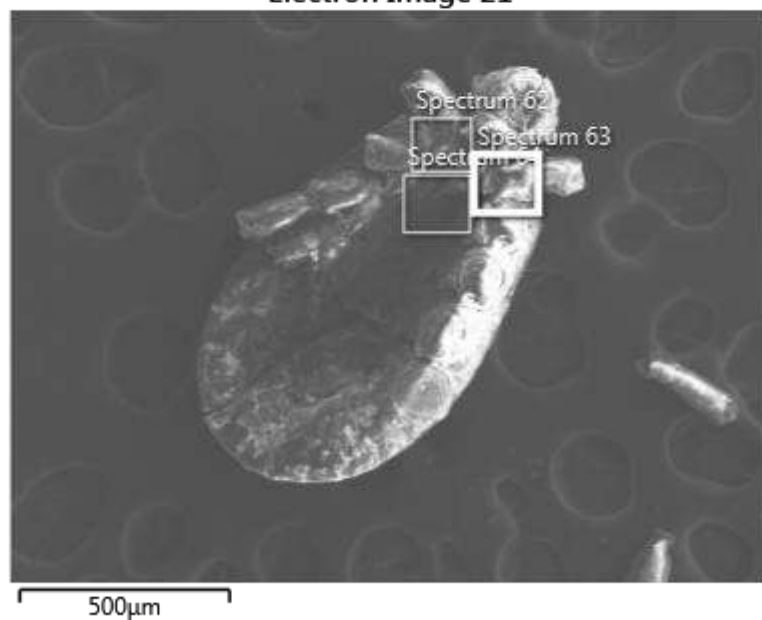

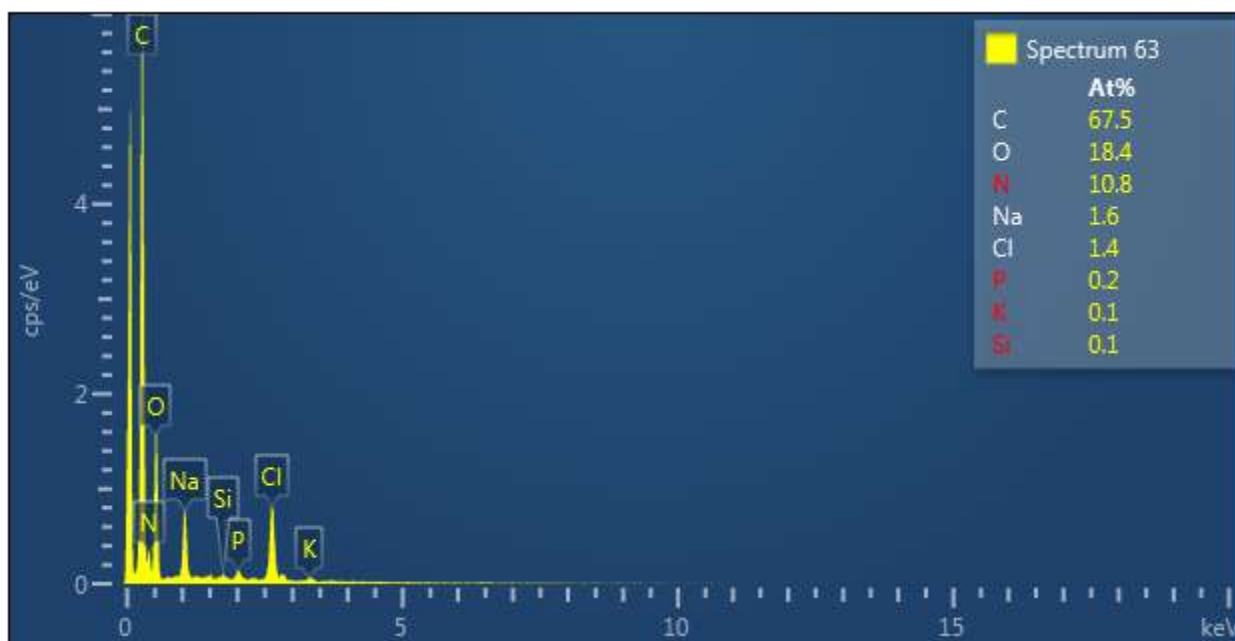

|                                 |                     |
|---------------------------------|---------------------|
| Label:                          | Spectrum 63         |
| Source:                         | Acquired            |
| Created:                        | 23/01/2020 12:31:30 |
| Livetime:                       | 60.0s               |
| Process Time:                   | 4                   |
| Accelerating Voltage:           | 15.00kV             |
| Magnification:                  | 62 x                |
| Working Distance:               | 10.0mm              |
| Specimen Tilt (degrees):        | 0.0                 |
| Elevation (degrees):            | 35.0                |
| Azimuth (degrees):              | 0.0                 |
| Number Of Channels:             | 2048                |
| Energy Range (keV):             | 20 keV              |
| Energy per Channel (eV):        | 10.0eV              |
| Detector Type Id:               | 29                  |
| Detector Type:                  | X-Max               |
| Window Type:                    | SATW                |
| Pulse Pile Up Correction:       | Succeeded           |
| Primary Detector:               | 2617                |
| Primary Detector Serial Number: | 77871-X080          |

| Element | Line Type | Apparent Concentration | k Ratio | Wt%   | Wt% Sigma | Atomic % | Standard Label | Factory Standard | Standard Calibration Date |
|---------|-----------|------------------------|---------|-------|-----------|----------|----------------|------------------|---------------------------|
| C       | K series  | 10.87                  | 0.10865 | 59.94 | 0.95      | 67.49    | C Vit          | Yes              |                           |
| N       | K series  | 2.75                   | 0.00490 | 11.21 | 1.19      | 10.82    | BN             | Yes              |                           |
| O       | K         | 4.70                   | 0.0158  | 21.79 | 0.52      | 18.42    | SiO2           | Yes              |                           |

|        |          |      |         |        |      |        |                  |     |  |
|--------|----------|------|---------|--------|------|--------|------------------|-----|--|
|        | series   |      | 1       |        |      |        |                  |     |  |
| Na     | K series | 1.25 | 0.00528 | 2.67   | 0.10 | 1.57   | Albite           | Yes |  |
| Si     | K series | 0.05 | 0.00040 | 0.13   | 0.03 | 0.06   | SiO <sub>2</sub> | Yes |  |
| P      | K series | 0.20 | 0.00112 | 0.35   | 0.04 | 0.15   | GaP              | Yes |  |
| Cl     | K series | 1.36 | 0.01192 | 3.66   | 0.11 | 1.40   | NaCl             | Yes |  |
| K      | K series | 0.10 | 0.00085 | 0.26   | 0.05 | 0.09   | KBr              | Yes |  |
| Total: |          |      |         | 100.00 |      | 100.00 |                  |     |  |

Electron Image 21

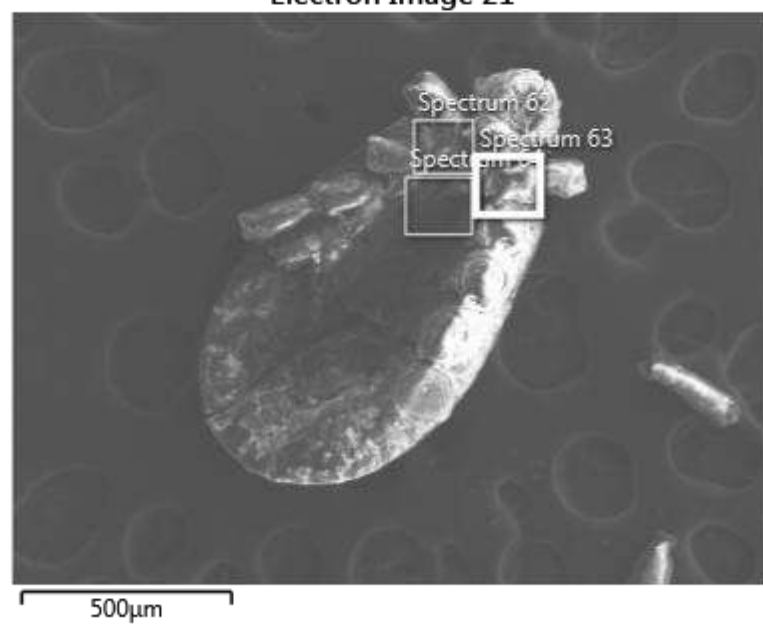

23/01/2020 12:32:42

Project 1

Rumania 6

Pecho 1 15 Kv

Electron Image 21

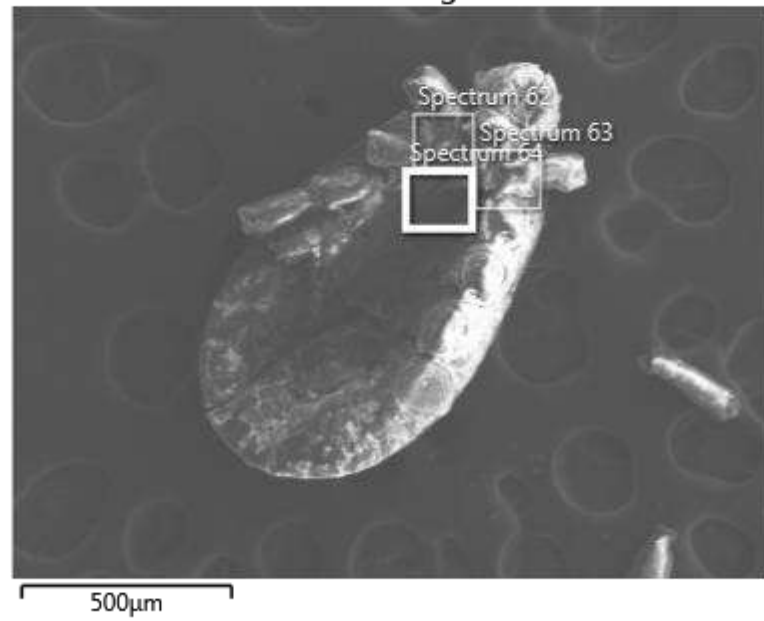



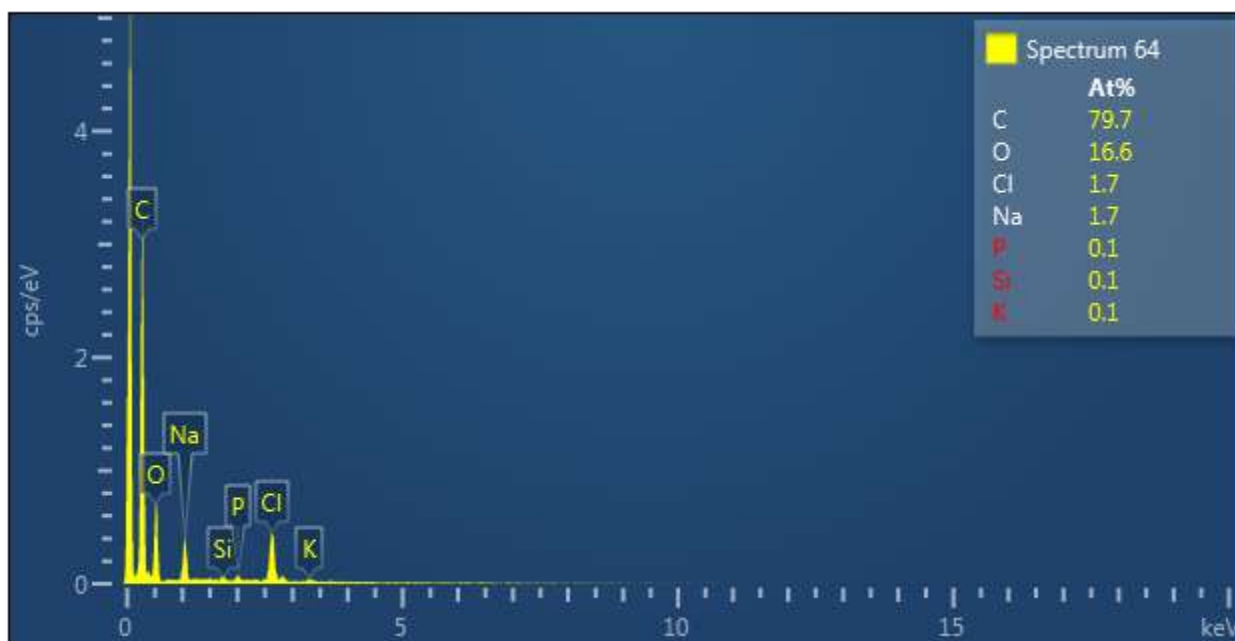

|                                 |                     |
|---------------------------------|---------------------|
| Label:                          | Spectrum 64         |
| Source:                         | Acquired            |
| Created:                        | 23/01/2020 12:32:42 |
| Livetime:                       | 60.2s               |
| Process Time:                   | 4                   |
| Accelerating Voltage:           | 15.00kV             |
| Magnification:                  | 62 x                |
| Working Distance:               | 10.0mm              |
| Specimen Tilt (degrees):        | 0.0                 |
| Elevation (degrees):            | 35.0                |
| Azimuth (degrees):              | 0.0                 |
| Number Of Channels:             | 2048                |
| Energy Range (keV):             | 20 keV              |
| Energy per Channel (eV):        | 10.0eV              |
| Detector Type Id:               | 29                  |
| Detector Type:                  | X-Max               |
| Window Type:                    | SATW                |
| Pulse Pile Up Correction:       | Succeeded           |
| Primary Detector:               | 2617                |
| Primary Detector Serial Number: | 77871-X080          |

| Element | Line Type | Apparent Concentration | k Ratio | Wt%   | Wt% Sigma | Atomic % | Standard Label | Factory Standard | Standard Calibration Date |
|---------|-----------|------------------------|---------|-------|-----------|----------|----------------|------------------|---------------------------|
| C       | K series  | 5.58                   | 0.05584 | 71.80 | 0.69      | 79.68    | C Vit          | Yes              |                           |
| O       | K series  | 2.03                   | 0.00682 | 19.90 | 0.62      | 16.58    | SiO2           | Yes              |                           |
| Na      | K         | 0.64                   | 0.0026  | 2.89  | 0.14      | 1.68     | Albite         | Yes              |                           |

|        |          |      |         |        |      |        |                  |     |  |
|--------|----------|------|---------|--------|------|--------|------------------|-----|--|
|        | series   |      | 9       |        |      |        |                  |     |  |
| Si     | K series | 0.05 | 0.00037 | 0.26   | 0.06 | 0.12   | SiO <sub>2</sub> | Yes |  |
| P      | K series | 0.09 | 0.00049 | 0.33   | 0.07 | 0.14   | GaP              | Yes |  |
| Cl     | K series | 0.77 | 0.00673 | 4.55   | 0.17 | 1.71   | NaCl             | Yes |  |
| K      | K series | 0.05 | 0.00039 | 0.26   | 0.08 | 0.09   | KBr              | Yes |  |
| Total: |          |      |         | 100.00 |      | 100.00 |                  |     |  |

Electron Image 21

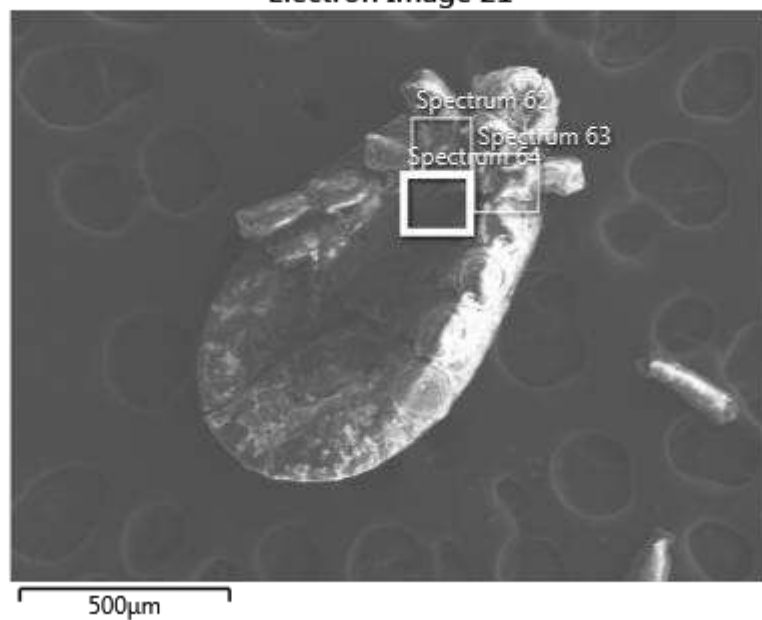

23/01/2020 12:34:56

Project 1

Rumania 6

Ventral 1 15 Kv

Electron Image 22

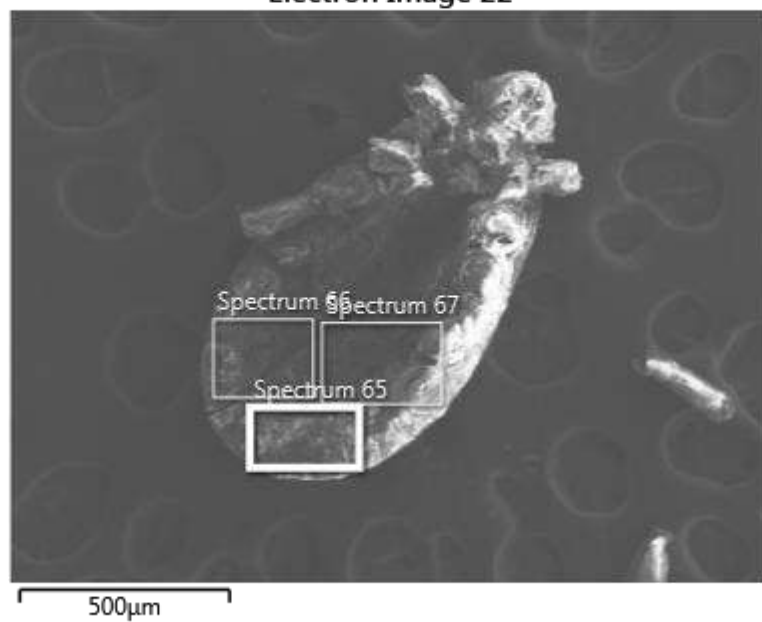

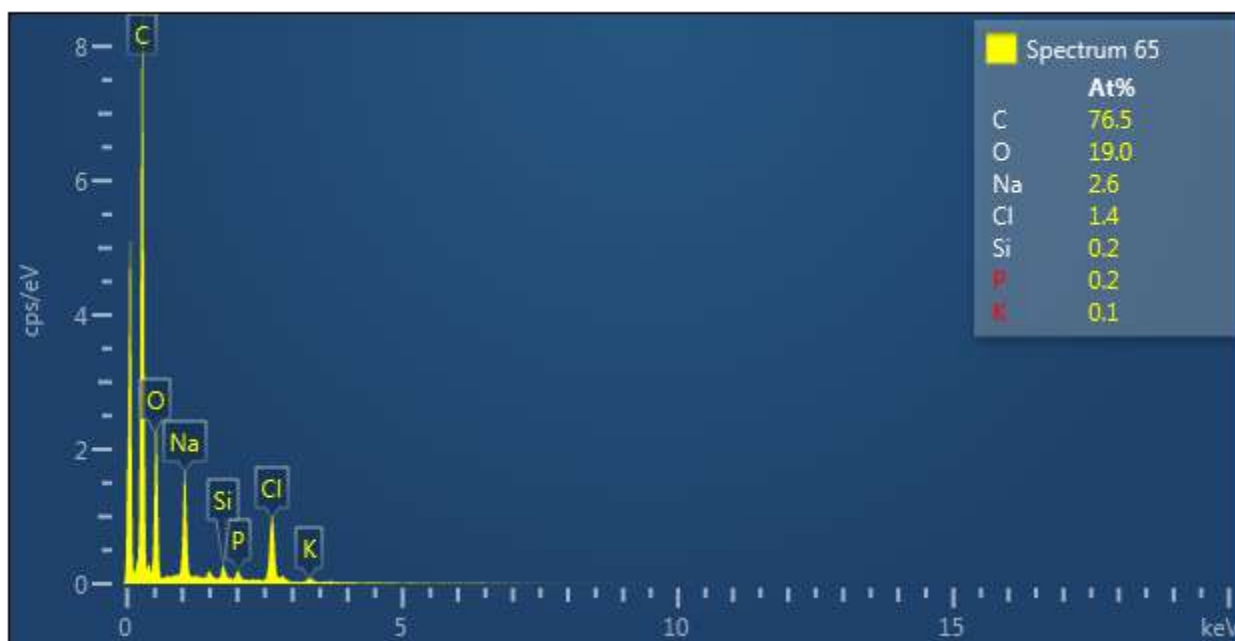

|                                 |                     |
|---------------------------------|---------------------|
| Label:                          | Spectrum 65         |
| Source:                         | Acquired            |
| Created:                        | 23/01/2020 12:34:56 |
| Livetime:                       | 60.1s               |
| Process Time:                   | 4                   |
| Accelerating Voltage:           | 15.00kV             |
| Magnification:                  | 62 x                |
| Working Distance:               | 10.0mm              |
| Specimen Tilt (degrees):        | 0.0                 |
| Elevation (degrees):            | 35.0                |
| Azimuth (degrees):              | 0.0                 |
| Number Of Channels:             | 2048                |
| Energy Range (keV):             | 20 keV              |
| Energy per Channel (eV):        | 10.0eV              |
| Detector Type Id:               | 29                  |
| Detector Type:                  | X-Max               |
| Window Type:                    | SATW                |
| Pulse Pile Up Correction:       | Succeeded           |
| Primary Detector:               | 2617                |
| Primary Detector Serial Number: | 77871-X080          |

| Element | Line Type | Apparent Concentration | k Ratio | Wt%   | Wt% Sigma | Atomic % | Standard Label | Factory Standard | Standard Calibration Date |
|---------|-----------|------------------------|---------|-------|-----------|----------|----------------|------------------|---------------------------|
| C       | K series  | 14.75                  | 0.14746 | 68.15 | 0.43      | 76.49    | C Vit          | Yes              |                           |
| O       | K series  | 6.69                   | 0.02251 | 22.53 | 0.38      | 18.99    | SiO2           | Yes              |                           |
| Na      | K         | 2.69                   | 0.0113  | 4.45  | 0.10      | 2.61     | Albite         | Yes              |                           |

|        |          |      |         |        |      |        |                  |     |  |
|--------|----------|------|---------|--------|------|--------|------------------|-----|--|
|        | series   |      | 6       |        |      |        |                  |     |  |
| Si     | K series | 0.25 | 0.00200 | 0.51   | 0.04 | 0.25   | SiO <sub>2</sub> | Yes |  |
| P      | K series | 0.26 | 0.00146 | 0.37   | 0.04 | 0.16   | GaP              | Yes |  |
| Cl     | K series | 1.72 | 0.01499 | 3.70   | 0.09 | 1.41   | NaCl             | Yes |  |
| K      | K series | 0.14 | 0.00117 | 0.29   | 0.04 | 0.10   | KBr              | Yes |  |
| Total: |          |      |         | 100.00 |      | 100.00 |                  |     |  |

Electron Image 22

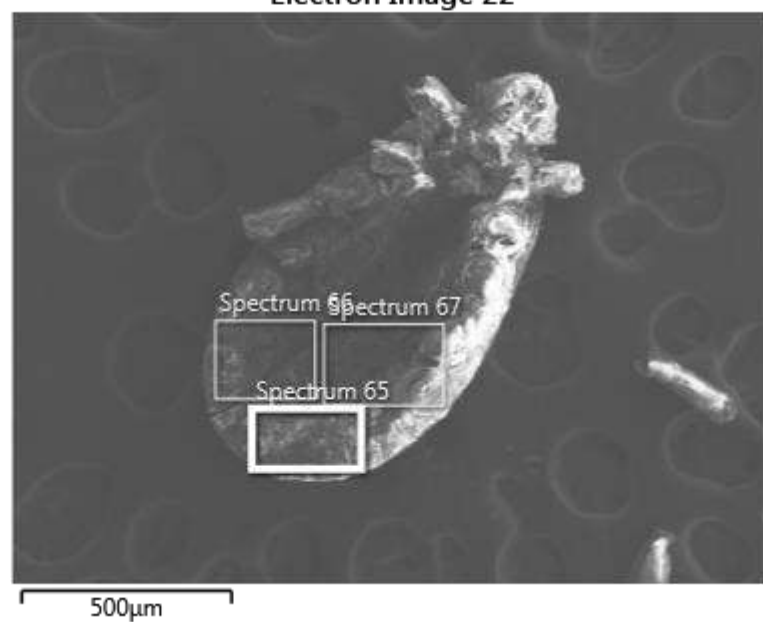

23/01/2020 12:36:08

Project 1

Rumania 6

Ventral 1 15 Kv

Electron Image 22

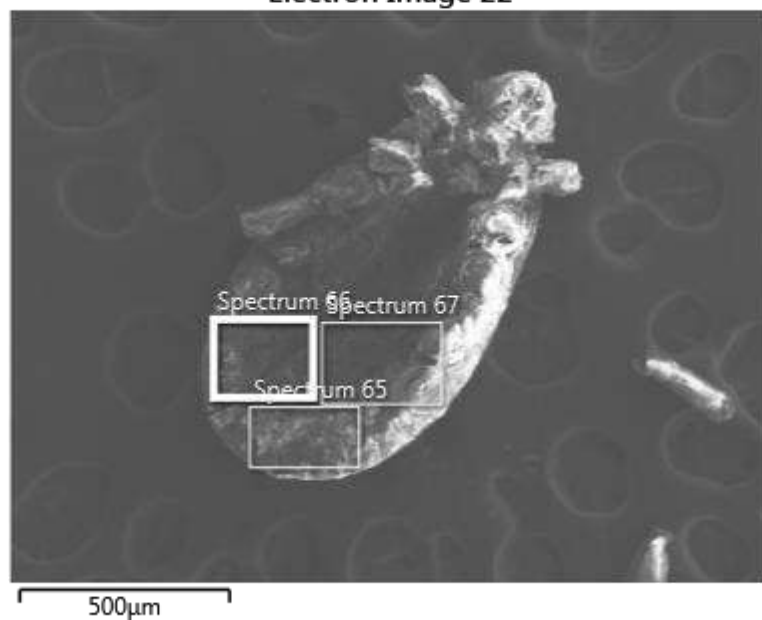

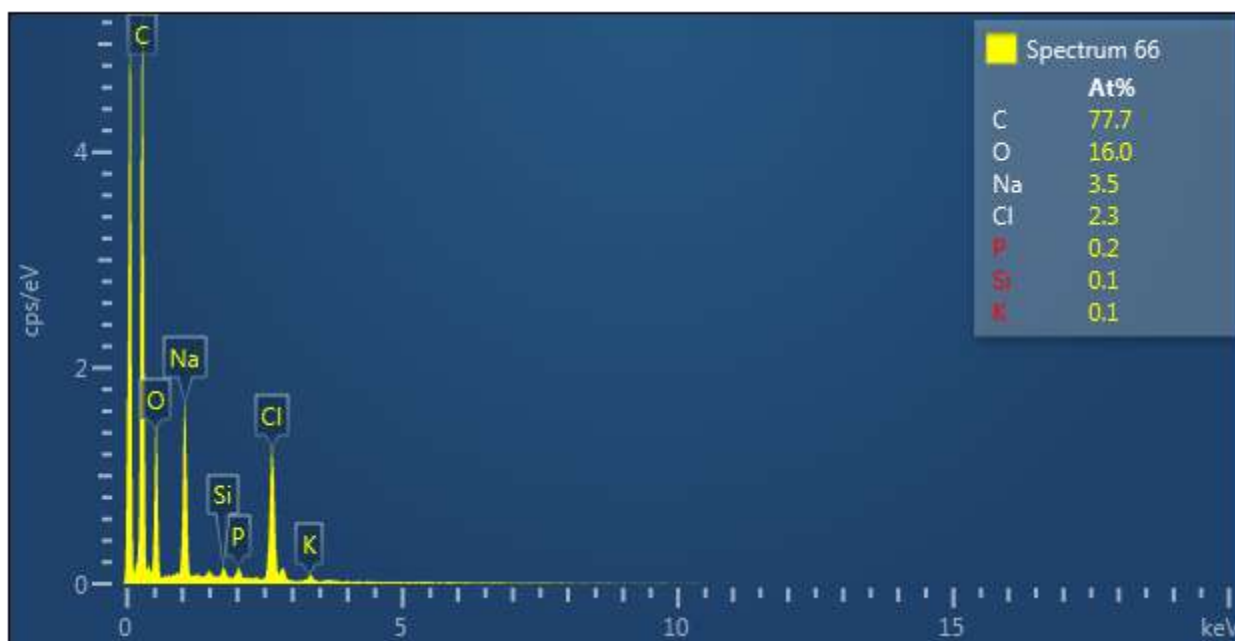

|                                 |                     |
|---------------------------------|---------------------|
| Label:                          | Spectrum 66         |
| Source:                         | Acquired            |
| Created:                        | 23/01/2020 12:36:08 |
| Livetime:                       | 60.3s               |
| Process Time:                   | 4                   |
| Accelerating Voltage:           | 15.00kV             |
| Magnification:                  | 62 x                |
| Working Distance:               | 10.0mm              |
| Specimen Tilt (degrees):        | 0.0                 |
| Elevation (degrees):            | 35.0                |
| Azimuth (degrees):              | 0.0                 |
| Number Of Channels:             | 2048                |
| Energy Range (keV):             | 20 keV              |
| Energy per Channel (eV):        | 10.0eV              |
| Detector Type Id:               | 29                  |
| Detector Type:                  | X-Max               |
| Window Type:                    | SATW                |
| Pulse Pile Up Correction:       | Succeeded           |
| Primary Detector:               | 2617                |
| Primary Detector Serial Number: | 77871-X080          |

| Element | Line Type | Apparent Concentration | k Ratio | Wt%   | Wt% Sigma | Atomic % | Standard Label | Factory Standard | Standard Calibration Date |
|---------|-----------|------------------------|---------|-------|-----------|----------|----------------|------------------|---------------------------|
| C       | K series  | 9.30                   | 0.09301 | 68.32 | 0.50      | 77.73    | C Vit          | Yes              |                           |
| O       | K series  | 4.13                   | 0.01390 | 18.78 | 0.41      | 16.04    | SiO2           | Yes              |                           |
| Na      | K         | 2.80                   | 0.0118  | 5.87  | 0.14      | 3.49     | Albite         | Yes              |                           |

|        |          |      |         |        |      |        |                  |     |  |
|--------|----------|------|---------|--------|------|--------|------------------|-----|--|
|        | series   |      | 1       |        |      |        |                  |     |  |
| Si     | K series | 0.11 | 0.00090 | 0.30   | 0.04 | 0.15   | SiO <sub>2</sub> | Yes |  |
| P      | K series | 0.20 | 0.00114 | 0.37   | 0.04 | 0.16   | GaP              | Yes |  |
| Cl     | K series | 2.14 | 0.01874 | 5.99   | 0.14 | 2.31   | NaCl             | Yes |  |
| K      | K series | 0.13 | 0.00114 | 0.37   | 0.05 | 0.13   | KBr              | Yes |  |
| Total: |          |      |         | 100.00 |      | 100.00 |                  |     |  |

Electron Image 22

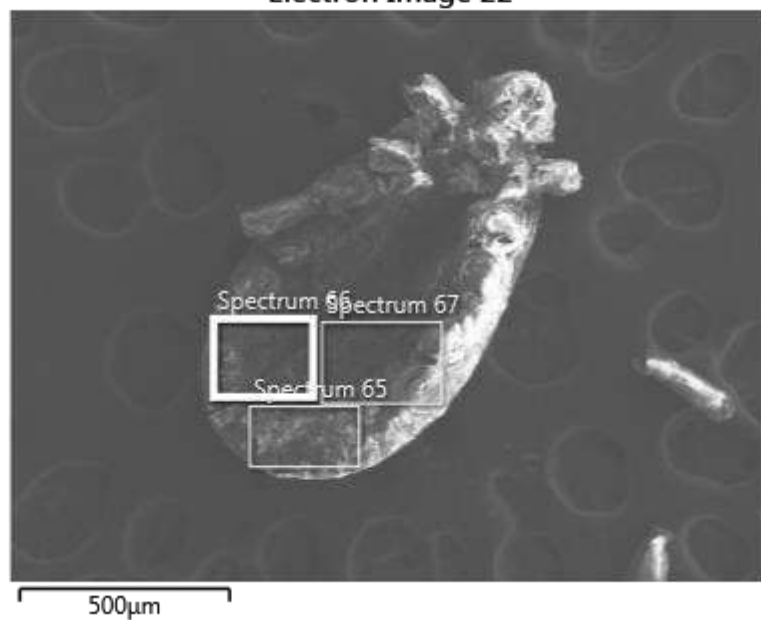



23/01/2020 12:37:20

Project 1

Rumania 6

Ventral 1 15 Kv

Electron Image 22

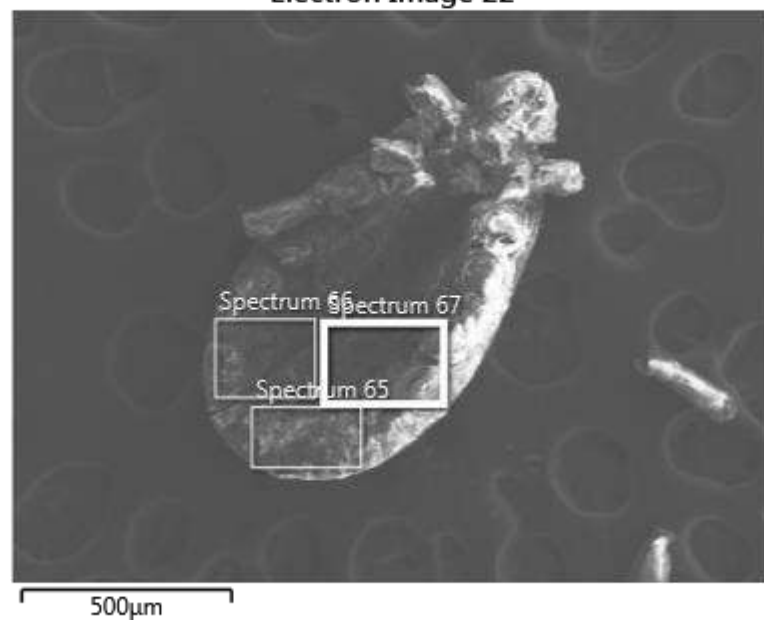

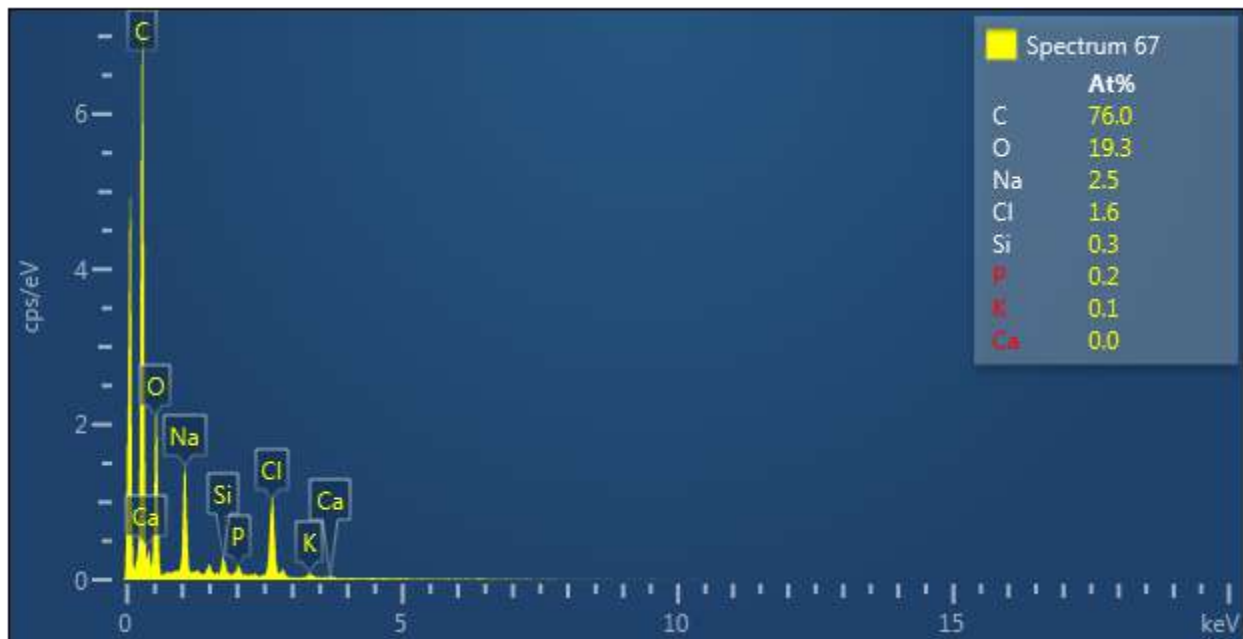

|                                 |                     |
|---------------------------------|---------------------|
| Label:                          | Spectrum 67         |
| Source:                         | Acquired            |
| Created:                        | 23/01/2020 12:37:20 |
| Livetime:                       | 60.3s               |
| Process Time:                   | 4                   |
| Accelerating Voltage:           | 15.00kV             |
| Magnification:                  | 62 x                |
| Working Distance:               | 10.0mm              |
| Specimen Tilt (degrees):        | 0.0                 |
| Elevation (degrees):            | 35.0                |
| Azimuth (degrees):              | 0.0                 |
| Number Of Channels:             | 2048                |
| Energy Range (keV):             | 20 keV              |
| Energy per Channel (eV):        | 10.0eV              |
| Detector Type Id:               | 29                  |
| Detector Type:                  | X-Max               |
| Window Type:                    | SATW                |
| Pulse Pile Up Correction:       | Succeeded           |
| Primary Detector:               | 2617                |
| Primary Detector Serial Number: | 77871-X080          |

| Element | Line Type | Apparent Concentration | k Ratio | Wt%   | Wt% Sigma | Atomic % | Standard Label | Factory Standard | Standard Calibration Date |
|---------|-----------|------------------------|---------|-------|-----------|----------|----------------|------------------|---------------------------|
| C       | K series  | 13.18                  | 0.13185 | 67.39 | 0.46      | 75.99    | C Vit          | Yes              |                           |
| O       | K series  | 6.41                   | 0.02157 | 22.81 | 0.41      | 19.31    | SiO2           | Yes              |                           |
| Na      | K         | 2.43                   | 0.0102  | 4.27  | 0.10      | 2.51     | Albite         | Yes              |                           |

|        |          |      |         |        |      |        |                  |     |  |
|--------|----------|------|---------|--------|------|--------|------------------|-----|--|
|        | series   |      | 7       |        |      |        |                  |     |  |
| Si     | K series | 0.28 | 0.00222 | 0.60   | 0.04 | 0.29   | SiO <sub>2</sub> | Yes |  |
| P      | K series | 0.24 | 0.00137 | 0.37   | 0.04 | 0.16   | GaP              | Yes |  |
| Cl     | K series | 1.82 | 0.01594 | 4.15   | 0.10 | 1.59   | NaCl             | Yes |  |
| K      | K series | 0.12 | 0.00104 | 0.27   | 0.04 | 0.09   | KBr              | Yes |  |
| Ca     | K series | 0.06 | 0.00055 | 0.14   | 0.04 | 0.05   | Wollastonite     | Yes |  |
| Total: |          |      |         | 100.00 |      | 100.00 |                  |     |  |

Electron Image 22

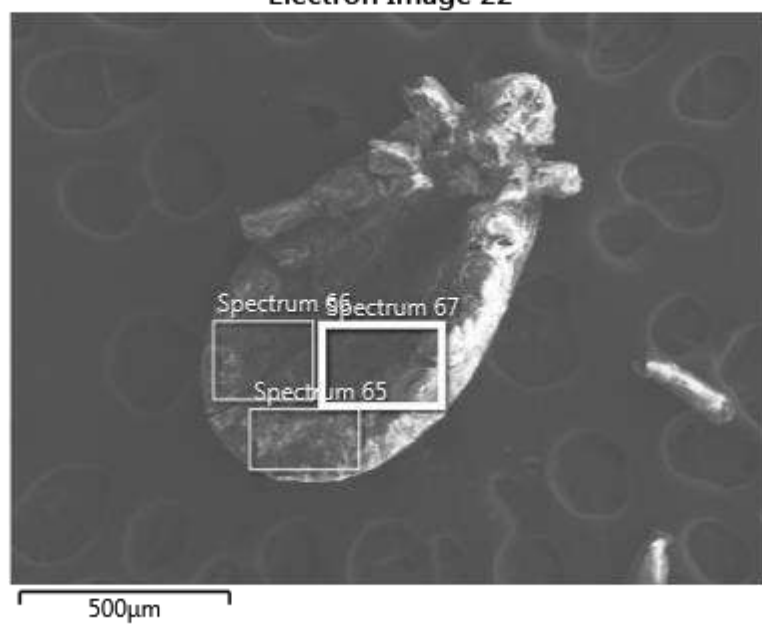

23/01/2020 12:40:11

Project 1

Rumania 7

Pecho 1 15 Kv

Electron Image 23

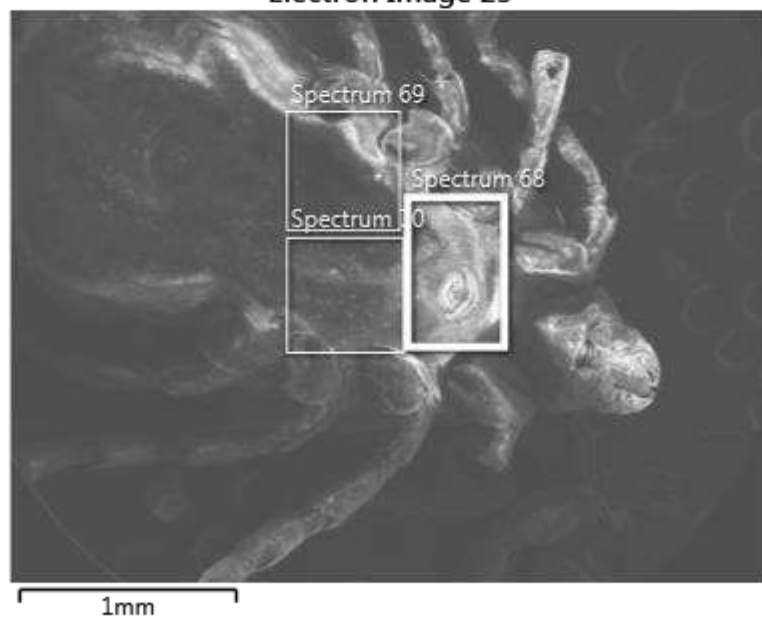

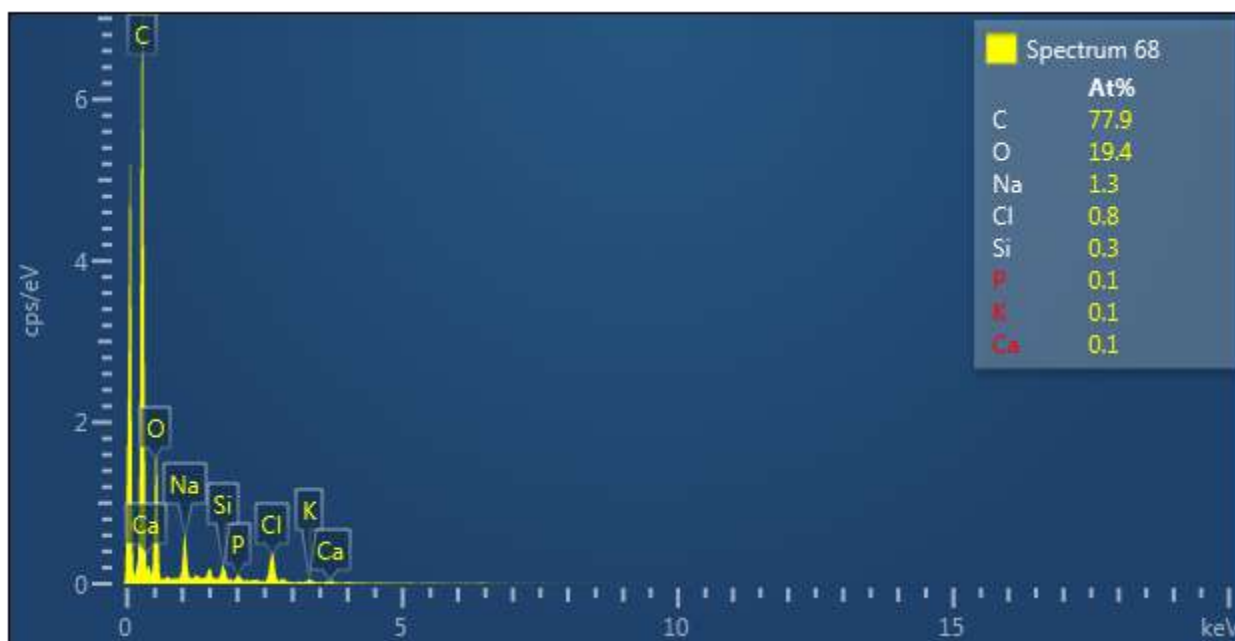

|                                 |                     |
|---------------------------------|---------------------|
| Label:                          | Spectrum 68         |
| Source:                         | Acquired            |
| Created:                        | 23/01/2020 12:40:11 |
| Livetime:                       | 60.4s               |
| Process Time:                   | 4                   |
| Accelerating Voltage:           | 15.00kV             |
| Magnification:                  | 32 x                |
| Working Distance:               | 10.0mm              |
| Specimen Tilt (degrees):        | 0.0                 |
| Elevation (degrees):            | 35.0                |
| Azimuth (degrees):              | 0.0                 |
| Number Of Channels:             | 2048                |
| Energy Range (keV):             | 20 keV              |
| Energy per Channel (eV):        | 10.0eV              |
| Detector Type Id:               | 29                  |
| Detector Type:                  | X-Max               |
| Window Type:                    | SATW                |
| Pulse Pile Up Correction:       | Succeeded           |
| Primary Detector:               | 2617                |
| Primary Detector Serial Number: | 77871-X080          |

| Element | Line Type | Apparent Concentration | k Ratio | Wt%   | Wt% Sigma | Atomic % | Standard Label | Factory Standard | Standard Calibration Date |
|---------|-----------|------------------------|---------|-------|-----------|----------|----------------|------------------|---------------------------|
| C       | K series  | 12.78                  | 0.12778 | 70.72 | 0.50      | 77.90    | C Vit          | Yes              |                           |
| O       | K series  | 4.66                   | 0.01568 | 23.43 | 0.47      | 19.38    | SiO2           | Yes              |                           |
| Na      | K         | 0.94                   | 0.0039  | 2.32  | 0.09      | 1.33     | Albite         | Yes              |                           |

|        |          |      |         |        |      |        |                  |     |  |
|--------|----------|------|---------|--------|------|--------|------------------|-----|--|
|        | series   |      | 6       |        |      |        |                  |     |  |
| Si     | K series | 0.22 | 0.00177 | 0.66   | 0.05 | 0.31   | SiO <sub>2</sub> | Yes |  |
| P      | K series | 0.16 | 0.00087 | 0.32   | 0.04 | 0.14   | GaP              | Yes |  |
| Cl     | K series | 0.65 | 0.00567 | 2.06   | 0.08 | 0.77   | NaCl             | Yes |  |
| K      | K series | 0.09 | 0.00076 | 0.27   | 0.05 | 0.09   | KBr              | Yes |  |
| Ca     | K series | 0.07 | 0.00060 | 0.21   | 0.05 | 0.07   | Wollastonite     | Yes |  |
| Total: |          |      |         | 100.00 |      | 100.00 |                  |     |  |

Electron Image 23

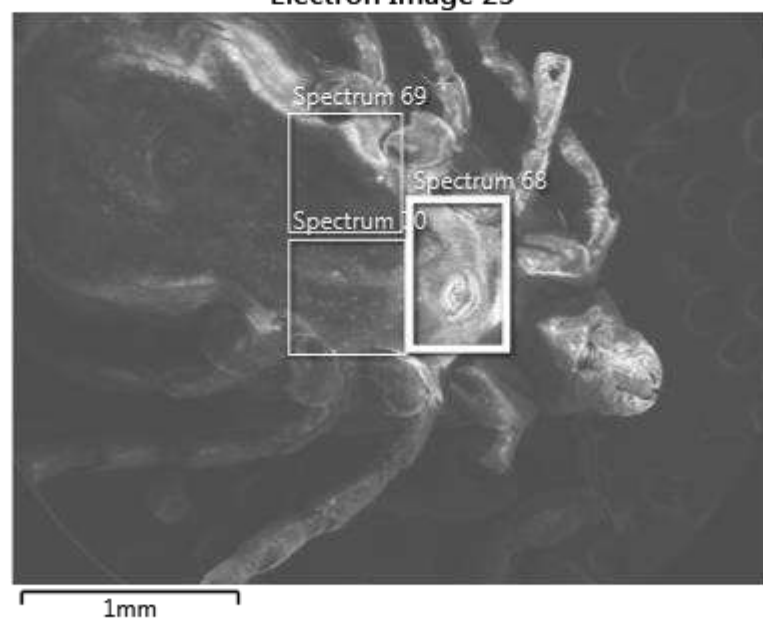

23/01/2020 12:41:22

Project 1

Rumania 7

Pecho 1 15 Kv

Electron Image 23

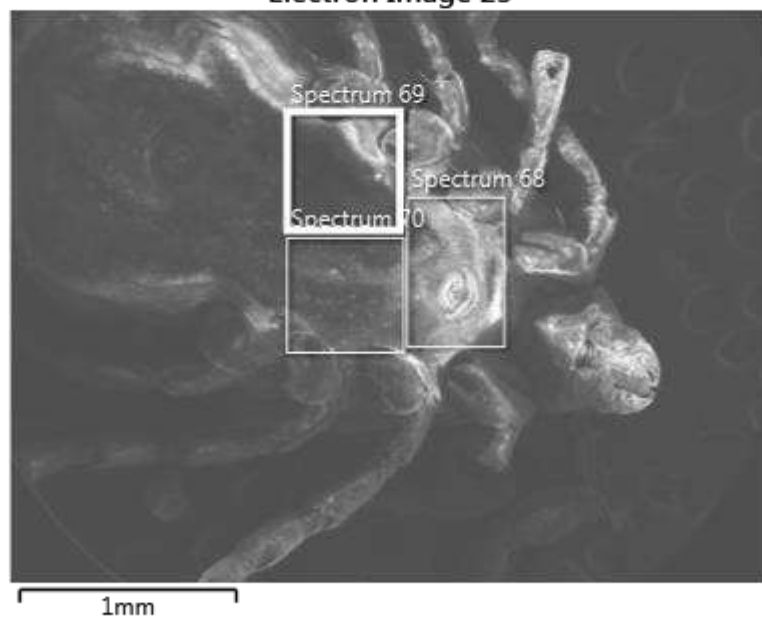

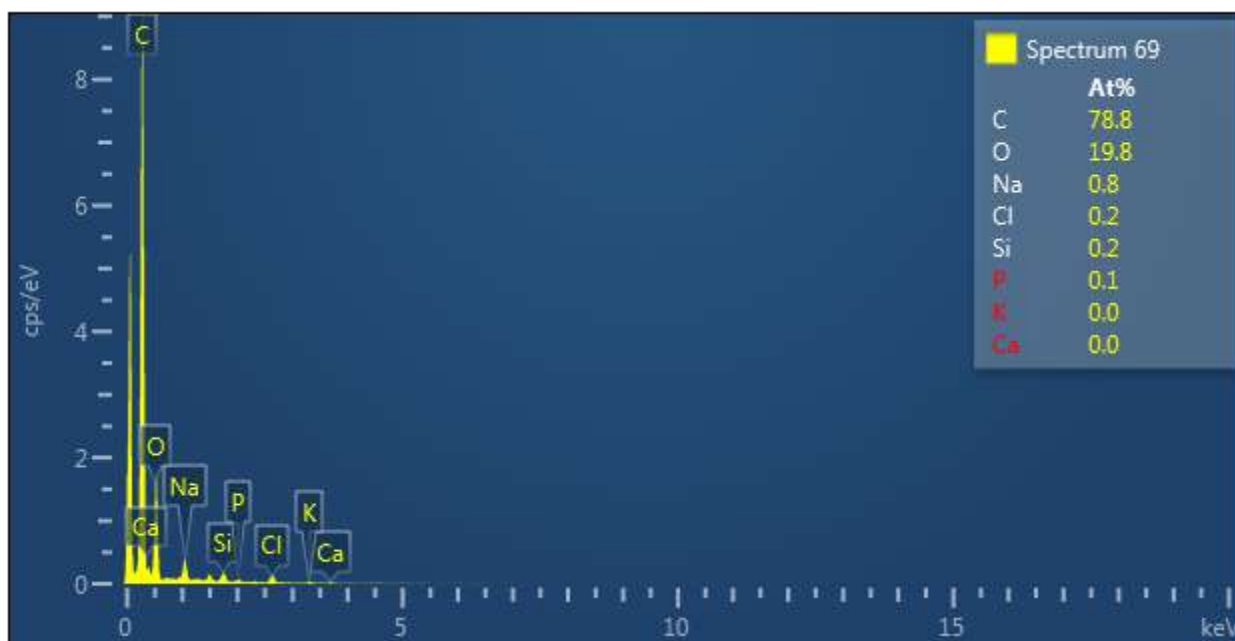

|                                 |                     |
|---------------------------------|---------------------|
| Label:                          | Spectrum 69         |
| Source:                         | Acquired            |
| Created:                        | 23/01/2020 12:41:22 |
| Livetime:                       | 60.3s               |
| Process Time:                   | 4                   |
| Accelerating Voltage:           | 15.00kV             |
| Magnification:                  | 32 x                |
| Working Distance:               | 10.0mm              |
| Specimen Tilt (degrees):        | 0.0                 |
| Elevation (degrees):            | 35.0                |
| Azimuth (degrees):              | 0.0                 |
| Number Of Channels:             | 2048                |
| Energy Range (keV):             | 20 keV              |
| Energy per Channel (eV):        | 10.0eV              |
| Detector Type Id:               | 29                  |
| Detector Type:                  | X-Max               |
| Window Type:                    | SATW                |
| Pulse Pile Up Correction:       | Succeeded           |
| Primary Detector:               | 2617                |
| Primary Detector Serial Number: | 77871-X080          |

| Element | Line Type | Apparent Concentration | k Ratio | Wt%   | Wt% Sigma | Atomic % | Standard Label | Factory Standard | Standard Calibration Date |
|---------|-----------|------------------------|---------|-------|-----------|----------|----------------|------------------|---------------------------|
| C       | K series  | 16.31                  | 0.16312 | 72.71 | 0.48      | 78.79    | C Vit          | Yes              |                           |
| O       | K series  | 4.92                   | 0.01656 | 24.38 | 0.46      | 19.83    | SiO2           | Yes              |                           |
| Na      | K         | 0.54                   | 0.0022  | 1.33  | 0.08      | 0.75     | Albite         | Yes              |                           |



|        |          |      |         |        |      |        |                  |     |  |
|--------|----------|------|---------|--------|------|--------|------------------|-----|--|
|        | series   |      | 8       |        |      |        |                  |     |  |
| Si     | K series | 0.18 | 0.00140 | 0.52   | 0.04 | 0.24   | SiO <sub>2</sub> | Yes |  |
| P      | K series | 0.08 | 0.00043 | 0.16   | 0.04 | 0.07   | GaP              | Yes |  |
| Cl     | K series | 0.21 | 0.00186 | 0.67   | 0.05 | 0.24   | NaCl             | Yes |  |
| K      | K series | 0.04 | 0.00034 | 0.12   | 0.04 | 0.04   | KBr              | Yes |  |
| Ca     | K series | 0.04 | 0.00032 | 0.11   | 0.04 | 0.04   | Wollastonite     | Yes |  |
| Total: |          |      |         | 100.00 |      | 100.00 |                  |     |  |

Electron Image 23

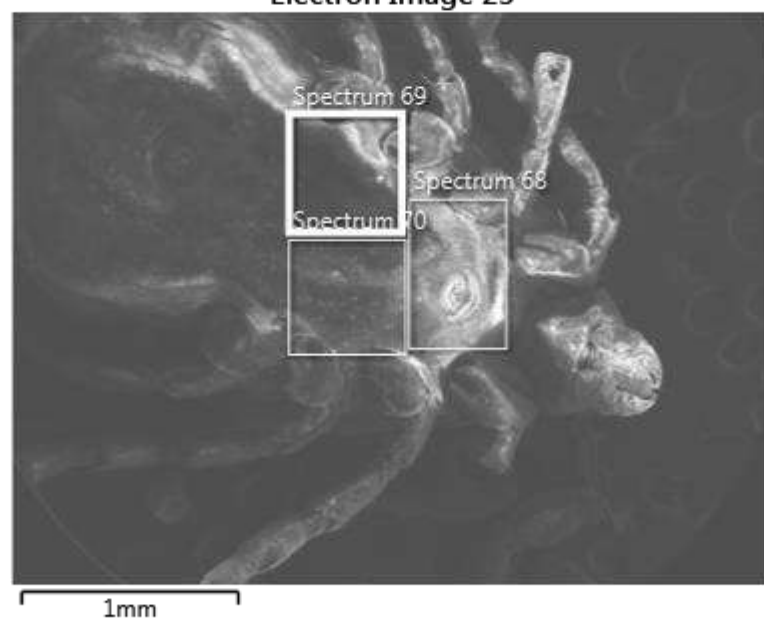

23/01/2020 12:42:33

Project 1

Rumania 7

Pecho 1 15 Kv

Electron Image 23

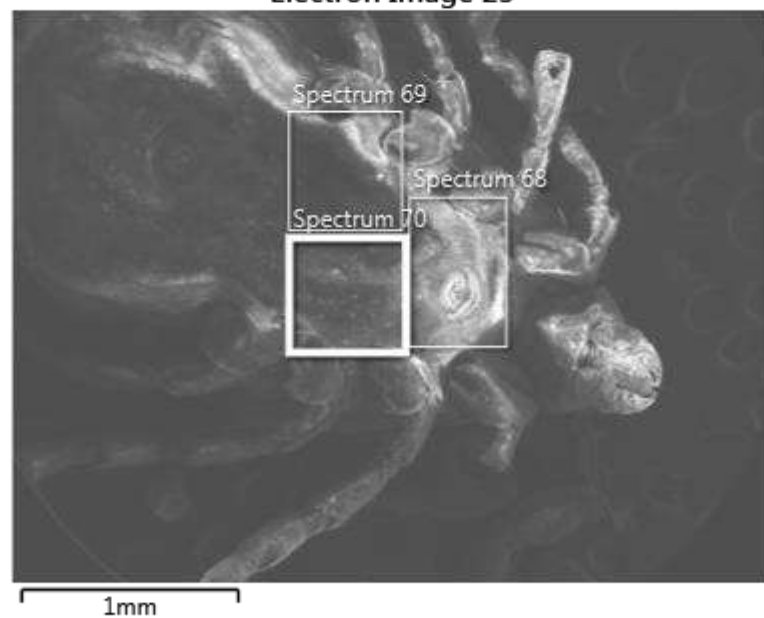

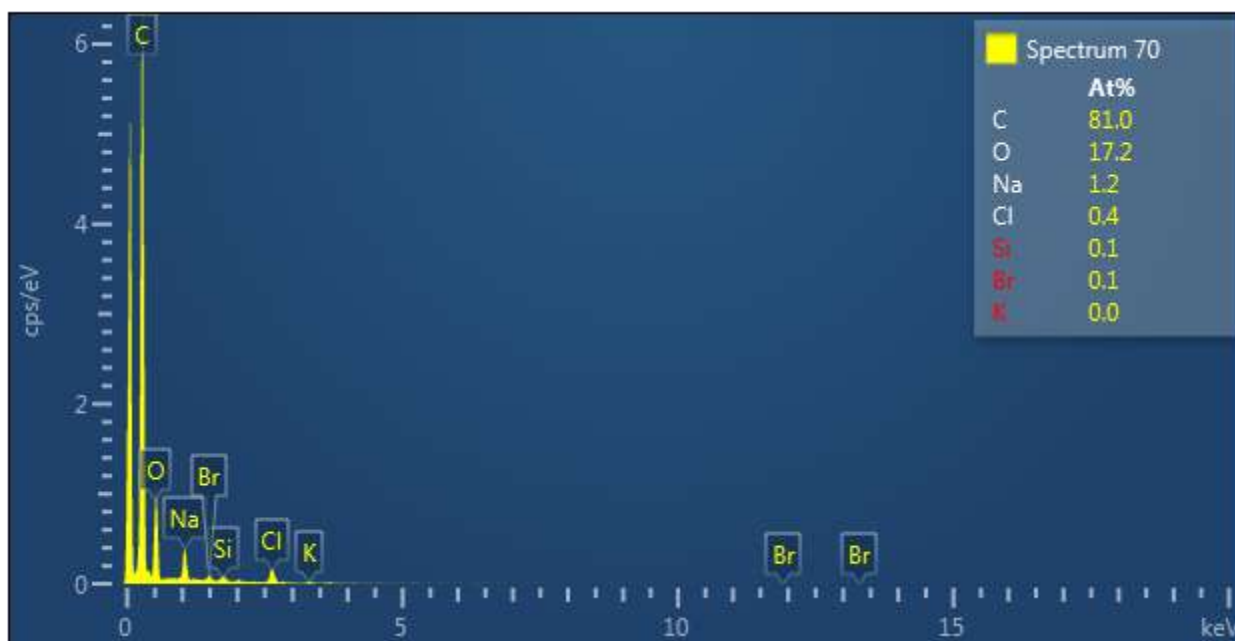

|                                 |                     |
|---------------------------------|---------------------|
| Label:                          | Spectrum 70         |
| Source:                         | Acquired            |
| Created:                        | 23/01/2020 12:42:33 |
| Livetime:                       | 60.3s               |
| Process Time:                   | 4                   |
| Accelerating Voltage:           | 15.00kV             |
| Magnification:                  | 32 x                |
| Working Distance:               | 10.0mm              |
| Specimen Tilt (degrees):        | 0.0                 |
| Elevation (degrees):            | 35.0                |
| Azimuth (degrees):              | 0.0                 |
| Number Of Channels:             | 2048                |
| Energy Range (keV):             | 20 keV              |
| Energy per Channel (eV):        | 10.0eV              |
| Detector Type Id:               | 29                  |
| Detector Type:                  | X-Max               |
| Window Type:                    | SATW                |
| Pulse Pile Up Correction:       | Succeeded           |
| Primary Detector:               | 2617                |
| Primary Detector Serial Number: | 77871-X080          |

| Element | Line Type | Apparent Concentration | k Ratio | Wt%   | Wt% Sigma | Atomic % | Standard Label | Factory Standard | Standard Calibration Date |
|---------|-----------|------------------------|---------|-------|-----------|----------|----------------|------------------|---------------------------|
| C       | K series  | 11.29                  | 0.11288 | 74.72 | 0.54      | 80.96    | C Vit          | Yes              |                           |
| O       | K series  | 2.93                   | 0.00986 | 21.15 | 0.52      | 17.20    | SiO2           | Yes              |                           |
| Na      | K         | 0.61                   | 0.0025  | 2.06  | 0.10      | 1.17     | Albite         | Yes              |                           |

|        |          |      |         |        |      |        |                  |     |  |
|--------|----------|------|---------|--------|------|--------|------------------|-----|--|
|        | series   |      | 6       |        |      |        |                  |     |  |
| Si     | K series | 0.06 | 0.00049 | 0.26   | 0.05 | 0.12   | SiO <sub>2</sub> | Yes |  |
| Cl     | K series | 0.26 | 0.00226 | 1.14   | 0.07 | 0.42   | NaCl             | Yes |  |
| K      | K series | 0.03 | 0.00027 | 0.14   | 0.04 | 0.05   | KBr              | Yes |  |
| Br     | L series | 0.10 | 0.00091 | 0.54   | 0.10 | 0.09   | KBr              | Yes |  |
| Total: |          |      |         | 100.00 |      | 100.00 |                  |     |  |

Electron Image 23

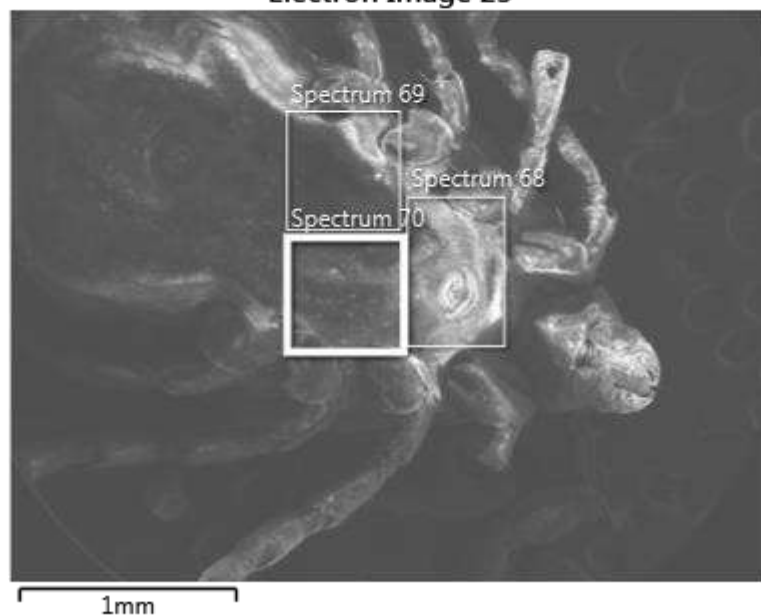

23/01/2020 12:44:26

Project 1

Rumania 7

Ventral 1 15 Kv

Electron Image 24

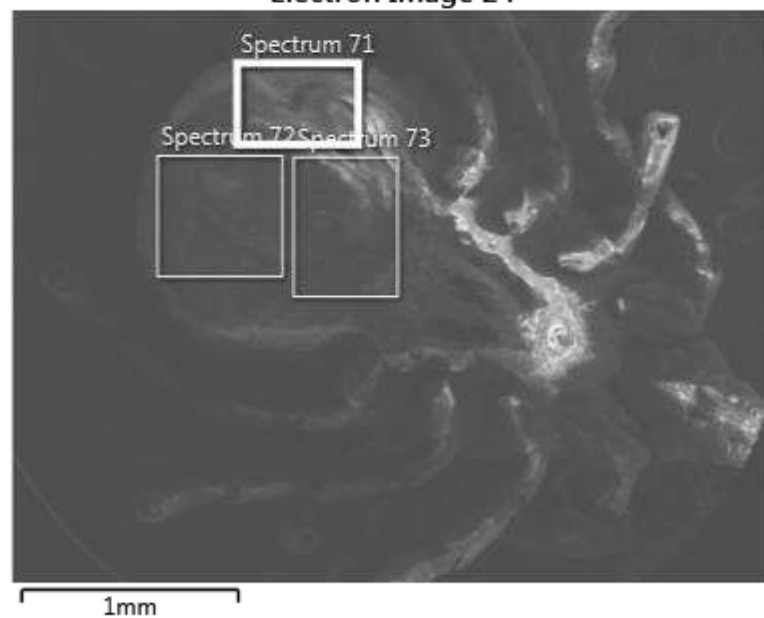

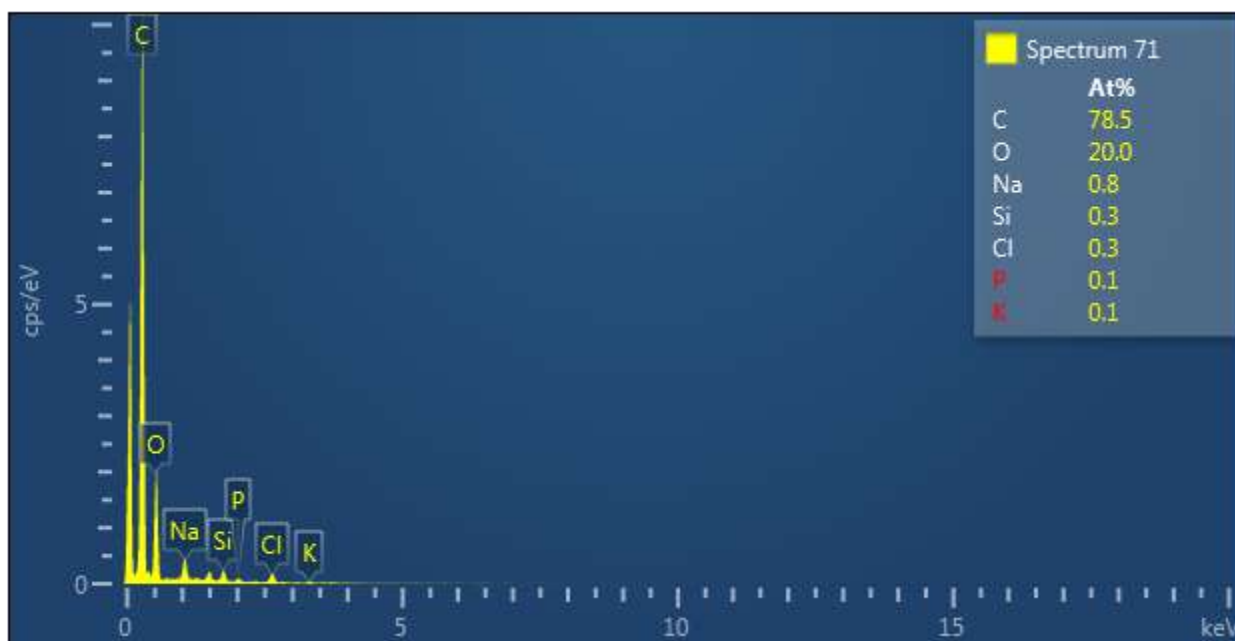

|                                 |                     |
|---------------------------------|---------------------|
| Label:                          | Spectrum 71         |
| Source:                         | Acquired            |
| Created:                        | 23/01/2020 12:44:26 |
| Livetime:                       | 60.4s               |
| Process Time:                   | 4                   |
| Accelerating Voltage:           | 15.00kV             |
| Magnification:                  | 32 x                |
| Working Distance:               | 10.0mm              |
| Specimen Tilt (degrees):        | 0.0                 |
| Elevation (degrees):            | 35.0                |
| Azimuth (degrees):              | 0.0                 |
| Number Of Channels:             | 2048                |
| Energy Range (keV):             | 20 keV              |
| Energy per Channel (eV):        | 10.0eV              |
| Detector Type Id:               | 29                  |
| Detector Type:                  | X-Max               |
| Window Type:                    | SATW                |
| Pulse Pile Up Correction:       | Succeeded           |
| Primary Detector:               | 2617                |
| Primary Detector Serial Number: | 77871-X080          |

| Element | Line Type | Apparent Concentration | k Ratio | Wt%   | Wt% Sigma | Atomic % | Standard Label | Factory Standard | Standard Calibration Date |
|---------|-----------|------------------------|---------|-------|-----------|----------|----------------|------------------|---------------------------|
| C       | K series  | 18.15                  | 0.18146 | 72.29 | 0.43      | 78.48    | C Vit          | Yes              |                           |
| O       | K series  | 5.71                   | 0.01922 | 24.57 | 0.42      | 20.02    | SiO2           | Yes              |                           |
| Na      | K         | 0.63                   | 0.0026  | 1.37  | 0.07      | 0.77     | Albite         | Yes              |                           |

|        |          |      |         |        |      |        |                  |     |  |
|--------|----------|------|---------|--------|------|--------|------------------|-----|--|
|        | series   |      | 8       |        |      |        |                  |     |  |
| Si     | K series | 0.24 | 0.00188 | 0.61   | 0.04 | 0.28   | SiO <sub>2</sub> | Yes |  |
| P      | K series | 0.12 | 0.00070 | 0.22   | 0.04 | 0.09   | GaP              | Yes |  |
| Cl     | K series | 0.27 | 0.00240 | 0.75   | 0.05 | 0.28   | NaCl             | Yes |  |
| K      | K series | 0.07 | 0.00063 | 0.20   | 0.04 | 0.07   | KBr              | Yes |  |
| Total: |          |      |         | 100.00 |      | 100.00 |                  |     |  |

Electron Image 24

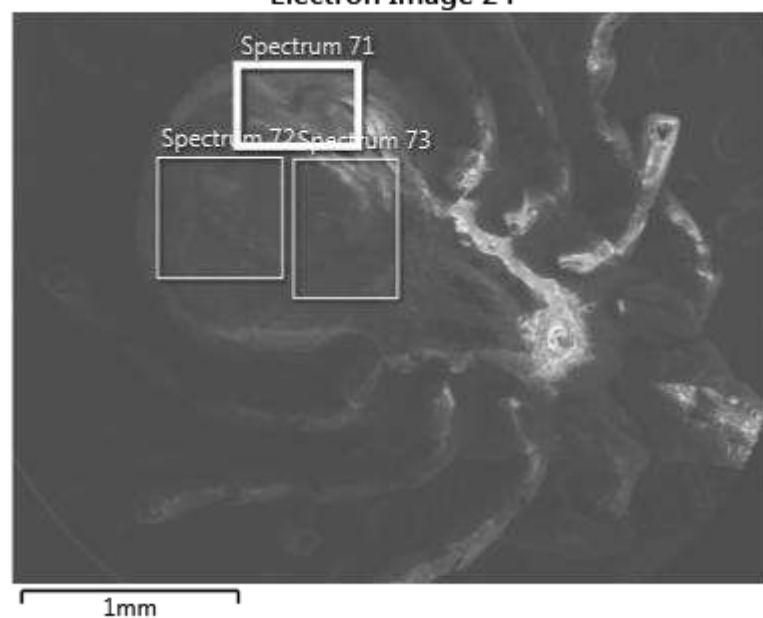

23/01/2020 12:45:37

Project 1

Rumania 7

Ventral 1 15 Kv

Electron Image 24

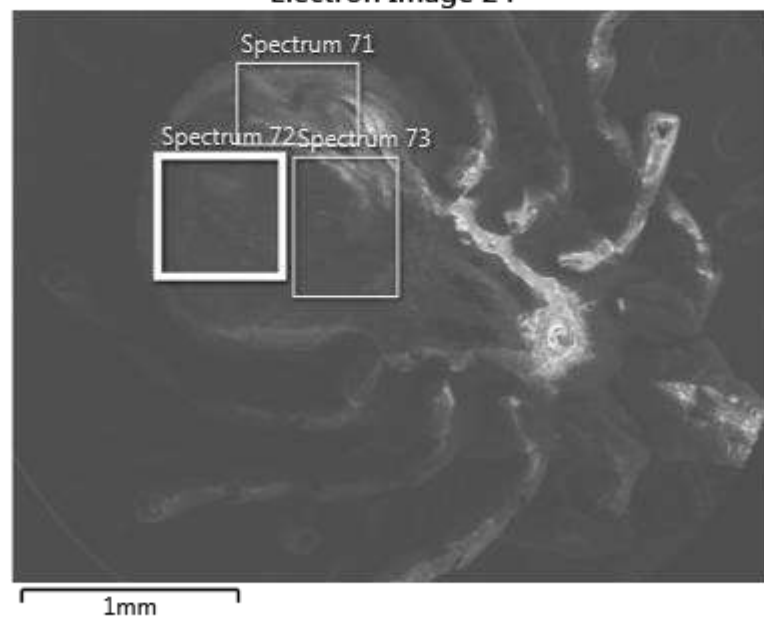



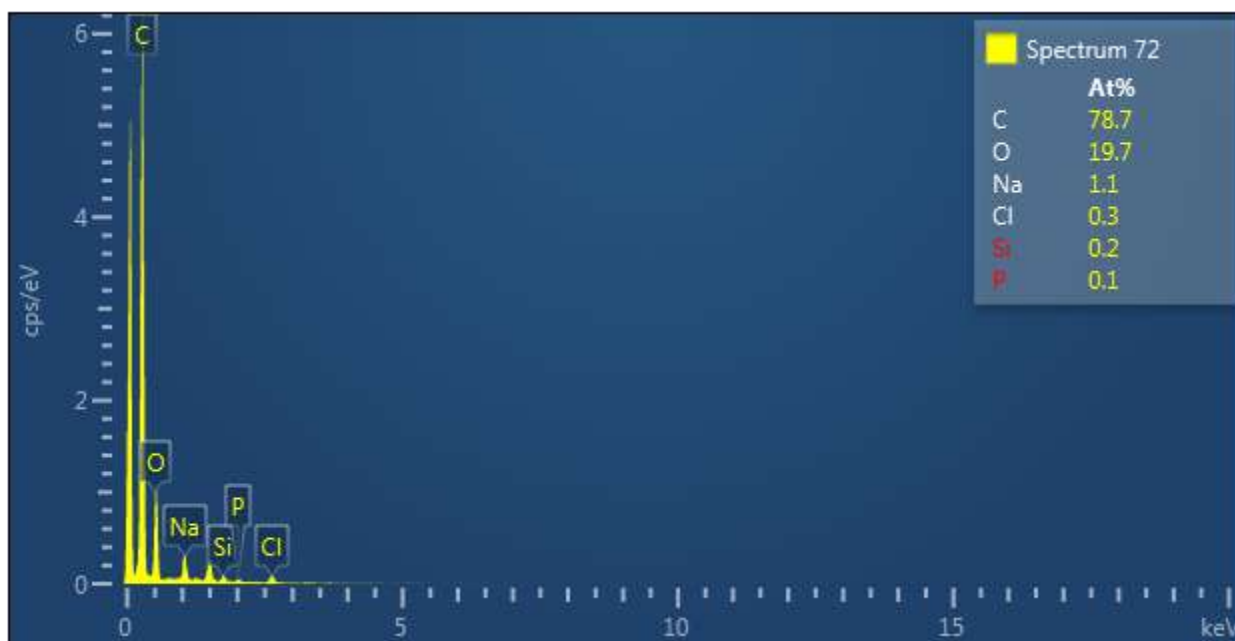

|                                 |                     |
|---------------------------------|---------------------|
| Label:                          | Spectrum 72         |
| Source:                         | Acquired            |
| Created:                        | 23/01/2020 12:45:37 |
| Livetime:                       | 60.5s               |
| Process Time:                   | 4                   |
| Accelerating Voltage:           | 15.00kV             |
| Magnification:                  | 32 x                |
| Working Distance:               | 10.0mm              |
| Specimen Tilt (degrees):        | 0.0                 |
| Elevation (degrees):            | 35.0                |
| Azimuth (degrees):              | 0.0                 |
| Number Of Channels:             | 2048                |
| Energy Range (keV):             | 20 keV              |
| Energy per Channel (eV):        | 10.0eV              |
| Detector Type Id:               | 29                  |
| Detector Type:                  | X-Max               |
| Window Type:                    | SATW                |
| Pulse Pile Up Correction:       | Succeeded           |
| Primary Detector:               | 2617                |
| Primary Detector Serial Number: | 77871-X080          |

| Element | Line Type | Apparent Concentration | k Ratio | Wt%   | Wt% Sigma | Atomic % | Standard Label | Factory Standard | Standard Calibration Date |
|---------|-----------|------------------------|---------|-------|-----------|----------|----------------|------------------|---------------------------|
| C       | K series  | 9.77                   | 0.09766 | 72.53 | 0.54      | 78.66    | C Vit          | Yes              |                           |
| O       | K series  | 3.00                   | 0.01011 | 24.20 | 0.53      | 19.71    | SiO2           | Yes              |                           |
| Na      | K         | 0.48                   | 0.0020  | 1.93  | 0.11      | 1.09     | Albite         | Yes              |                           |

|        |          |      |         |        |      |        |                  |     |  |
|--------|----------|------|---------|--------|------|--------|------------------|-----|--|
|        | series   |      | 3       |        |      |        |                  |     |  |
| Si     | K series | 0.09 | 0.00071 | 0.43   | 0.05 | 0.20   | SiO <sub>2</sub> | Yes |  |
| P      | K series | 0.06 | 0.00034 | 0.20   | 0.05 | 0.08   | GaP              | Yes |  |
| Cl     | K series | 0.14 | 0.00120 | 0.70   | 0.07 | 0.26   | NaCl             | Yes |  |
| Total: |          |      |         | 100.00 |      | 100.00 |                  |     |  |

Electron Image 24

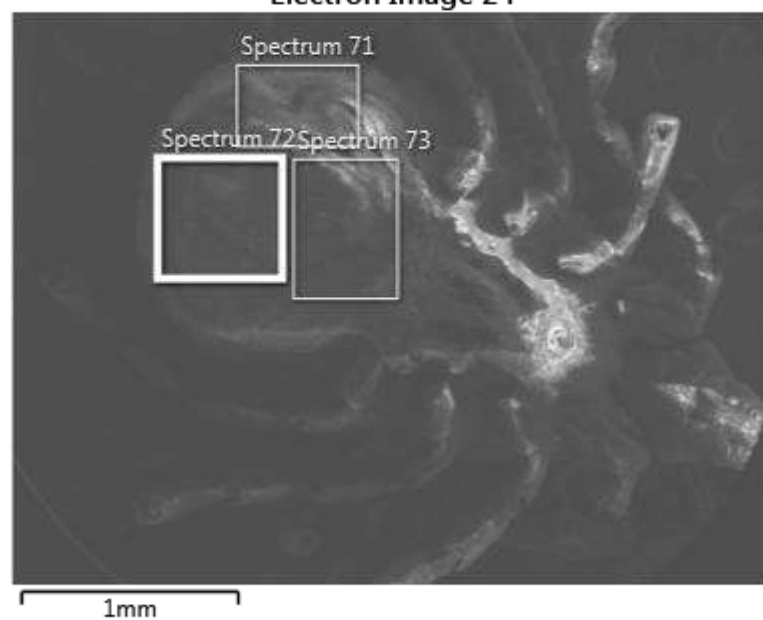

23/01/2020 12:46:48

Project 1

Rumania 7

Ventral 1 15 Kv

Electron Image 24

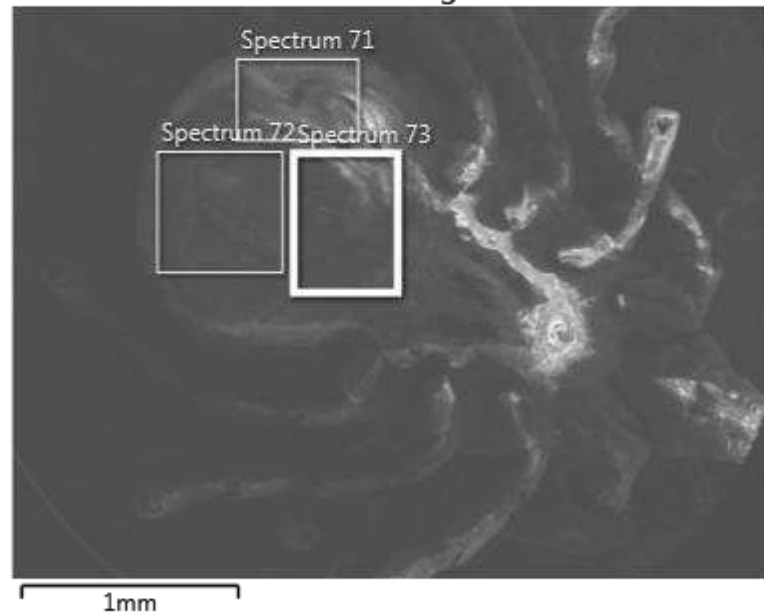

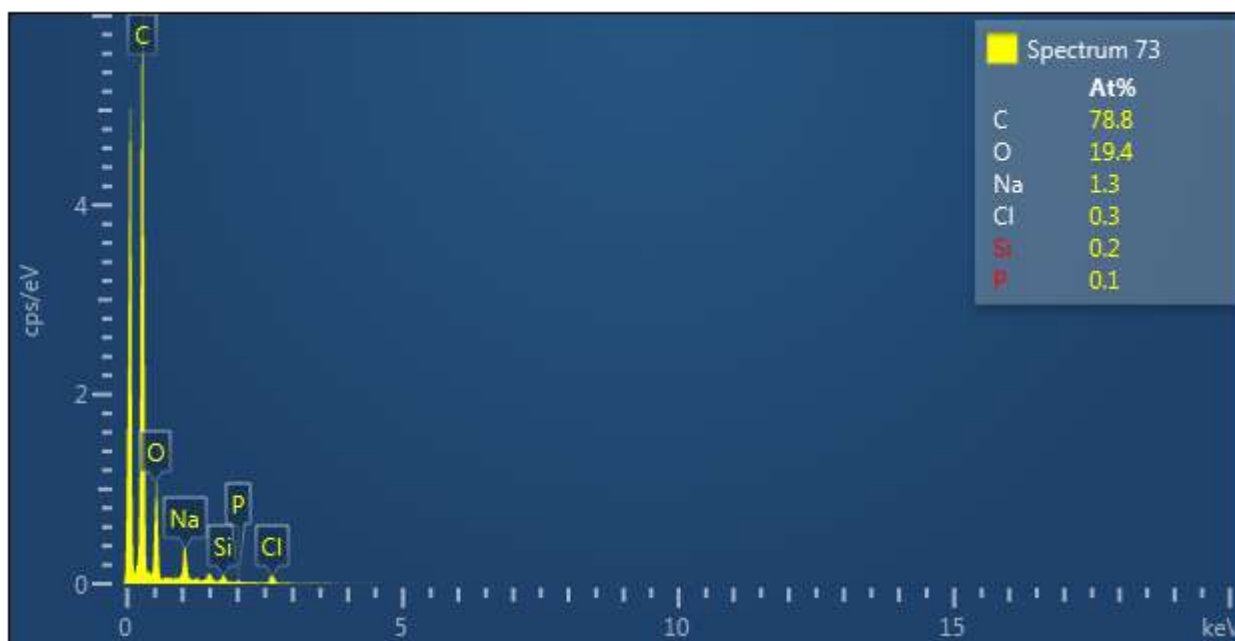

|                                 |                     |
|---------------------------------|---------------------|
| Label:                          | Spectrum 73         |
| Source:                         | Acquired            |
| Created:                        | 23/01/2020 12:46:48 |
| Livetime:                       | 60.5s               |
| Process Time:                   | 4                   |
| Accelerating Voltage:           | 15.00kV             |
| Magnification:                  | 32 x                |
| Working Distance:               | 10.0mm              |
| Specimen Tilt (degrees):        | 0.0                 |
| Elevation (degrees):            | 35.0                |
| Azimuth (degrees):              | 0.0                 |
| Number Of Channels:             | 2048                |
| Energy Range (keV):             | 20 keV              |
| Energy per Channel (eV):        | 10.0eV              |
| Detector Type Id:               | 29                  |
| Detector Type:                  | X-Max               |
| Window Type:                    | SATW                |
| Pulse Pile Up Correction:       | Succeeded           |
| Primary Detector:               | 2617                |
| Primary Detector Serial Number: | 77871-X080          |

| Element | Line Type | Apparent Concentration | k Ratio | Wt%   | Wt% Sigma | Atomic % | Standard Label | Factory Standard | Standard Calibration Date |
|---------|-----------|------------------------|---------|-------|-----------|----------|----------------|------------------|---------------------------|
| C       | K series  | 9.76                   | 0.09764 | 72.59 | 0.55      | 78.78    | C Vit          | Yes              |                           |
| O       | K series  | 2.96                   | 0.00996 | 23.76 | 0.54      | 19.36    | SiO2           | Yes              |                           |
| Na      | K         | 0.59                   | 0.0025  | 2.37  | 0.12      | 1.34     | Albite         | Yes              |                           |

|        |          |      |         |        |      |        |                  |     |  |
|--------|----------|------|---------|--------|------|--------|------------------|-----|--|
|        | series   |      | 1       |        |      |        |                  |     |  |
| Si     | K series | 0.09 | 0.00067 | 0.41   | 0.05 | 0.19   | SiO <sub>2</sub> | Yes |  |
| P      | K series | 0.04 | 0.00024 | 0.14   | 0.04 | 0.06   | GaP              | Yes |  |
| Cl     | K series | 0.14 | 0.00125 | 0.73   | 0.06 | 0.27   | NaCl             | Yes |  |
| Total: |          |      |         | 100.00 |      | 100.00 |                  |     |  |

Electron Image 24

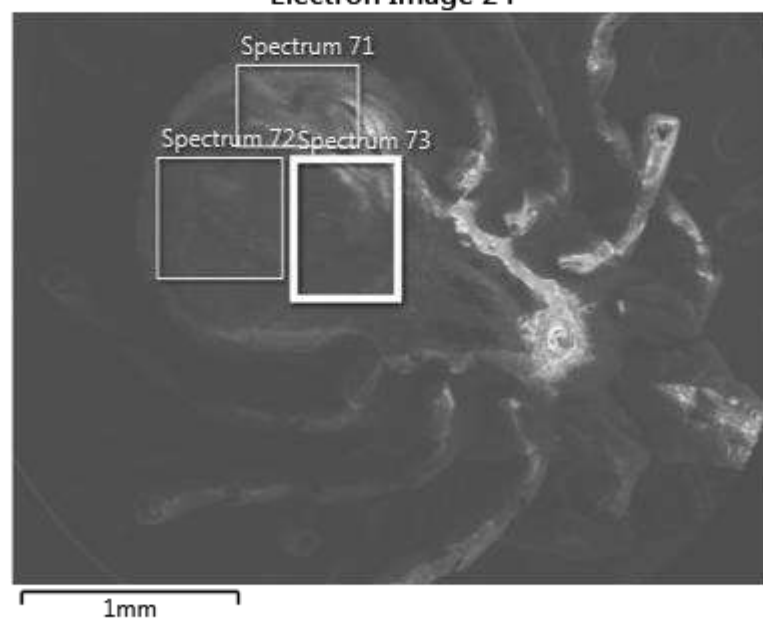

23/01/2020 12:49:07

Project 1

Rumania 8

Pecho 1 15 Kv

Electron Image 25

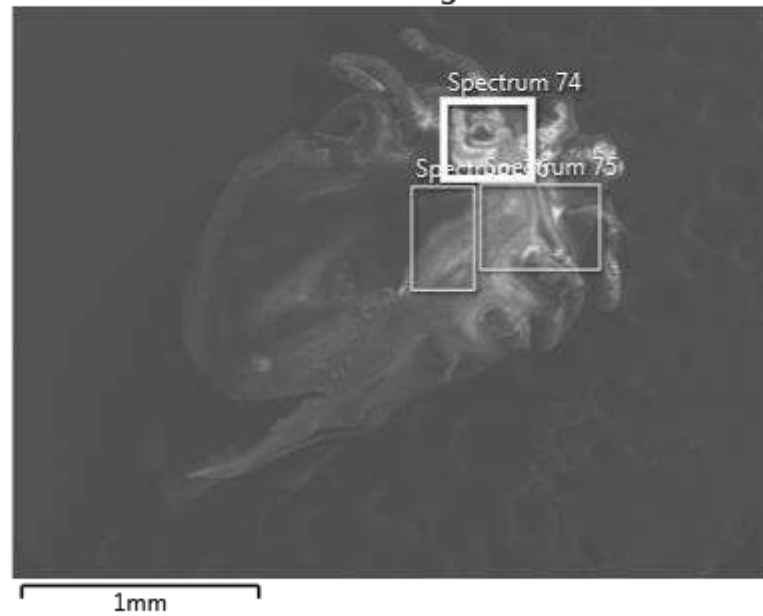

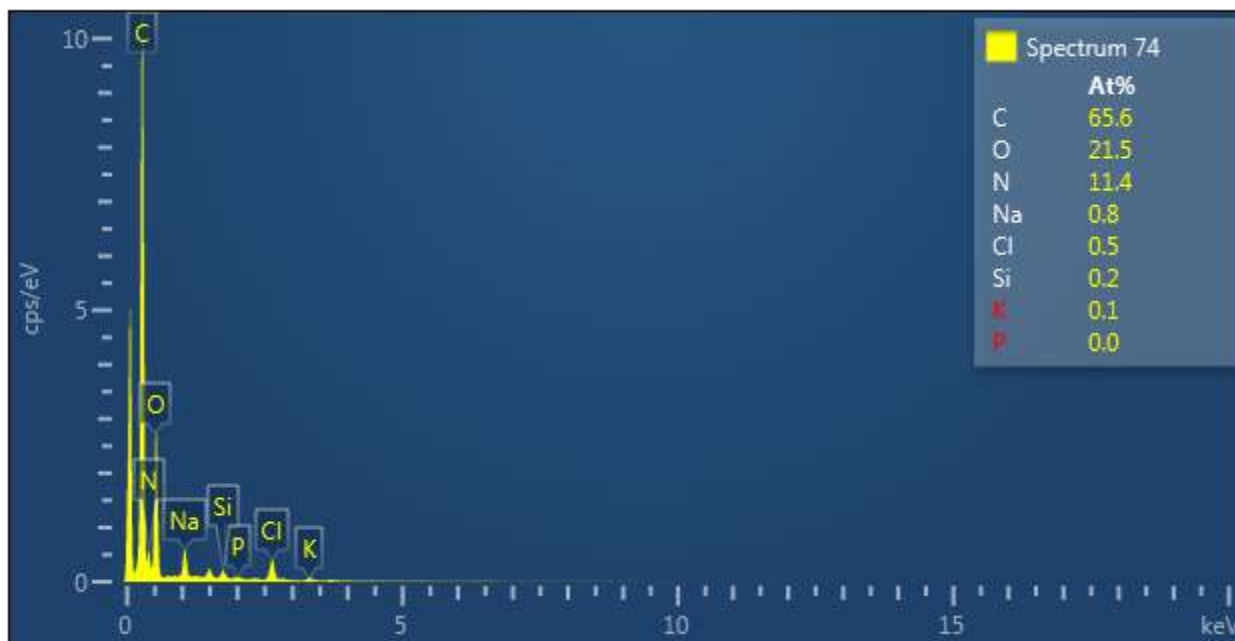

|                                 |                     |
|---------------------------------|---------------------|
| Label:                          | Spectrum 74         |
| Source:                         | Acquired            |
| Created:                        | 23/01/2020 12:49:07 |
| Livetime:                       | 60.1s               |
| Process Time:                   | 4                   |
| Accelerating Voltage:           | 15.00kV             |
| Magnification:                  | 35 x                |
| Working Distance:               | 10.0mm              |
| Specimen Tilt (degrees):        | 0.0                 |
| Elevation (degrees):            | 35.0                |
| Azimuth (degrees):              | 0.0                 |
| Number Of Channels:             | 2048                |
| Energy Range (keV):             | 20 keV              |
| Energy per Channel (eV):        | 10.0eV              |
| Detector Type Id:               | 29                  |
| Detector Type:                  | X-Max               |
| Window Type:                    | SATW                |
| Pulse Pile Up Correction:       | Succeeded           |
| Primary Detector:               | 2617                |
| Primary Detector Serial Number: | 77871-X080          |

| Element | Line Type | Apparent Concentration | k Ratio | Wt%   | Wt% Sigma | Atomic % | Standard Label | Factory Standard | Standard Calibration Date |
|---------|-----------|------------------------|---------|-------|-----------|----------|----------------|------------------|---------------------------|
| C       | K series  | 18.89                  | 0.18889 | 59.00 | 0.81      | 65.58    | C Vit          | Yes              |                           |
| N       | K series  | 4.26                   | 0.00758 | 11.94 | 1.04      | 11.39    | BN             | Yes              |                           |
| O       | K         | 7.82                   | 0.0263  | 25.71 | 0.48      | 21.46    | SiO2           | Yes              |                           |

|        |          |      |         |        |      |        |                  |     |  |
|--------|----------|------|---------|--------|------|--------|------------------|-----|--|
|        | series   |      | 2       |        |      |        |                  |     |  |
| Na     | K series | 0.89 | 0.00374 | 1.42   | 0.06 | 0.83   | Albite           | Yes |  |
| Si     | K series | 0.18 | 0.00141 | 0.33   | 0.03 | 0.16   | SiO <sub>2</sub> | Yes |  |
| P      | K series | 0.08 | 0.00043 | 0.10   | 0.03 | 0.04   | GaP              | Yes |  |
| Cl     | K series | 0.65 | 0.00566 | 1.28   | 0.05 | 0.48   | NaCl             | Yes |  |
| K      | K series | 0.11 | 0.00095 | 0.21   | 0.03 | 0.07   | KBr              | Yes |  |
| Total: |          |      |         | 100.00 |      | 100.00 |                  |     |  |

Electron Image 25

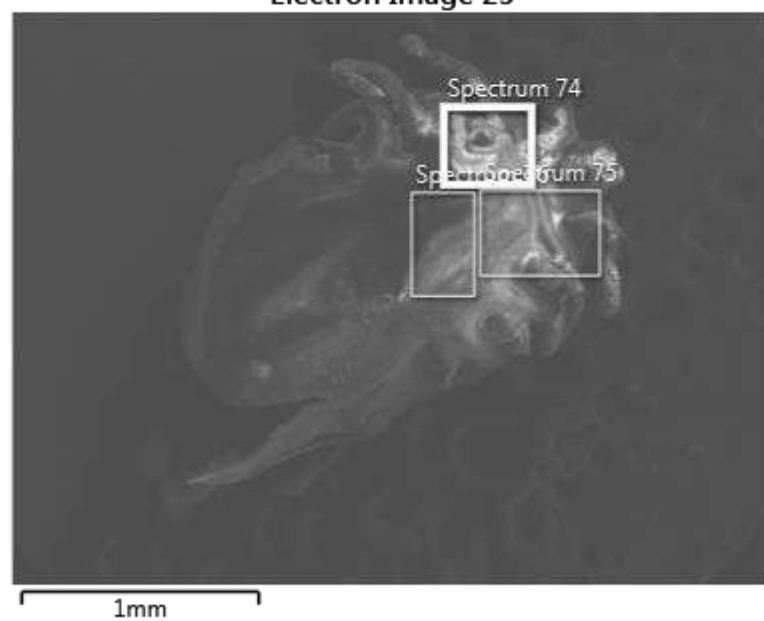



23/01/2020 12:50:20

Project 1

Rumania 8

Pecho 1 15 Kv

Electron Image 25

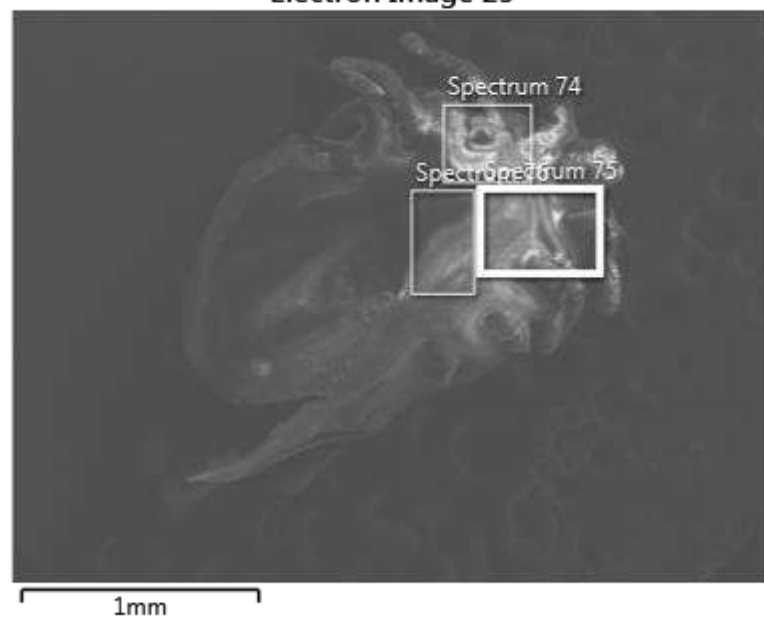

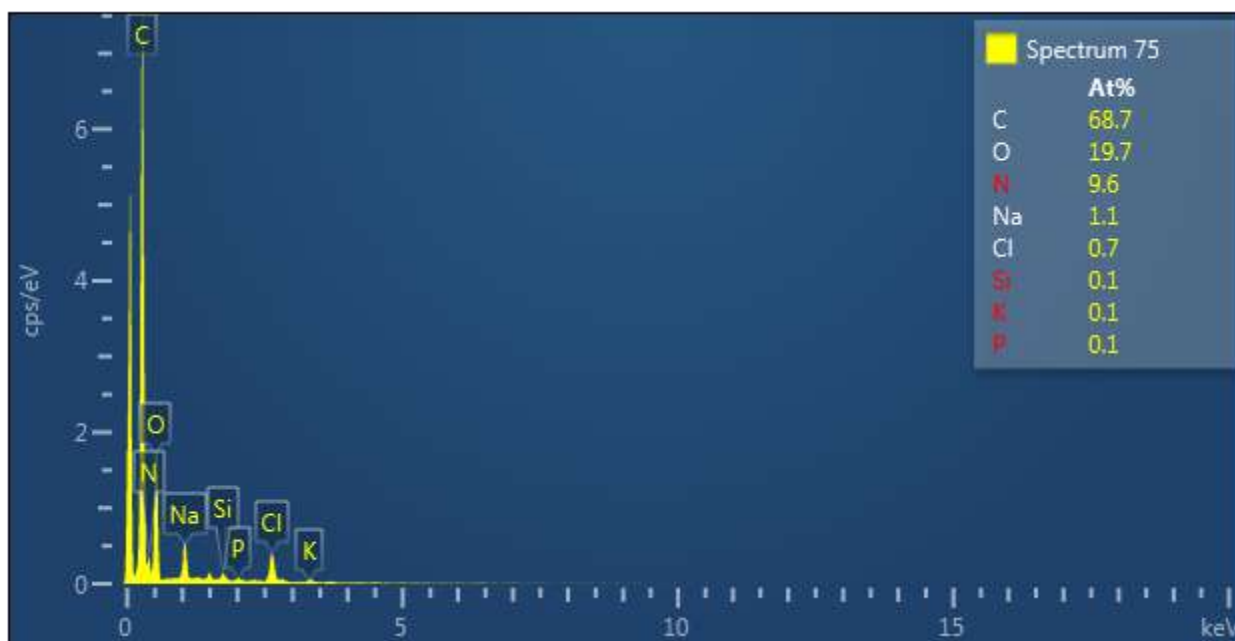

|                                 |                     |
|---------------------------------|---------------------|
| Label:                          | Spectrum 75         |
| Source:                         | Acquired            |
| Created:                        | 23/01/2020 12:50:20 |
| Livetime:                       | 60.5s               |
| Process Time:                   | 4                   |
| Accelerating Voltage:           | 15.00kV             |
| Magnification:                  | 35 x                |
| Working Distance:               | 10.0mm              |
| Specimen Tilt (degrees):        | 0.0                 |
| Elevation (degrees):            | 35.0                |
| Azimuth (degrees):              | 0.0                 |
| Number Of Channels:             | 2048                |
| Energy Range (keV):             | 20 keV              |
| Energy per Channel (eV):        | 10.0eV              |
| Detector Type Id:               | 29                  |
| Detector Type:                  | X-Max               |
| Window Type:                    | SATW                |
| Pulse Pile Up Correction:       | Succeeded           |
| Primary Detector:               | 2617                |
| Primary Detector Serial Number: | 77871-X080          |

| Element | Line Type | Apparent Concentration | k Ratio | Wt%   | Wt% Sigma | Atomic % | Standard Label | Factory Standard | Standard Calibration Date |
|---------|-----------|------------------------|---------|-------|-----------|----------|----------------|------------------|---------------------------|
| C       | K series  | 13.43                  | 0.13435 | 61.92 | 1.00      | 68.65    | C Vit          | Yes              |                           |
| N       | K series  | 2.42                   | 0.00430 | 10.10 | 1.28      | 9.60     | BN             | Yes              |                           |
| O       | K         | 5.08                   | 0.0170  | 23.71 | 0.55      | 19.73    | SiO2           | Yes              |                           |

|        |          |      |         |        |      |        |                  |     |  |
|--------|----------|------|---------|--------|------|--------|------------------|-----|--|
|        | series   |      | 9       |        |      |        |                  |     |  |
| Na     | K series | 0.84 | 0.00354 | 1.86   | 0.08 | 1.08   | Albite           | Yes |  |
| Si     | K series | 0.10 | 0.00077 | 0.25   | 0.04 | 0.12   | SiO <sub>2</sub> | Yes |  |
| P      | K series | 0.08 | 0.00042 | 0.14   | 0.03 | 0.06   | GaP              | Yes |  |
| Cl     | K series | 0.65 | 0.00570 | 1.81   | 0.08 | 0.68   | NaCl             | Yes |  |
| K      | K series | 0.08 | 0.00070 | 0.22   | 0.04 | 0.08   | KBr              | Yes |  |
| Total: |          |      |         | 100.00 |      | 100.00 |                  |     |  |

Electron Image 25

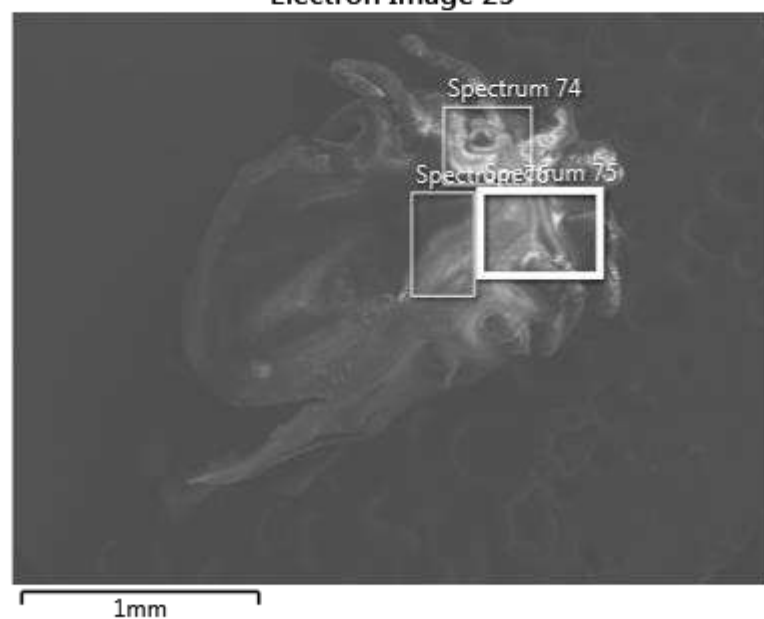

23/01/2020 12:51:31

Project 1

Rumania 8

Pecho 1 15 Kv

Electron Image 25

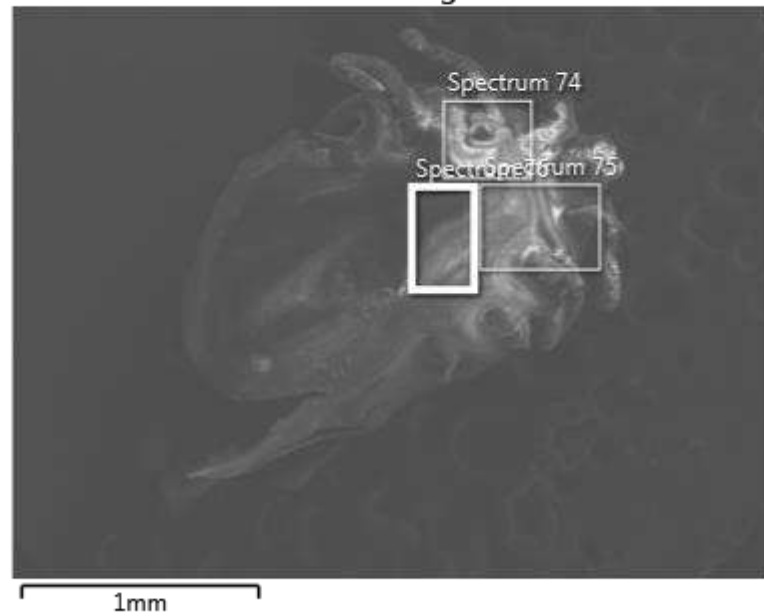

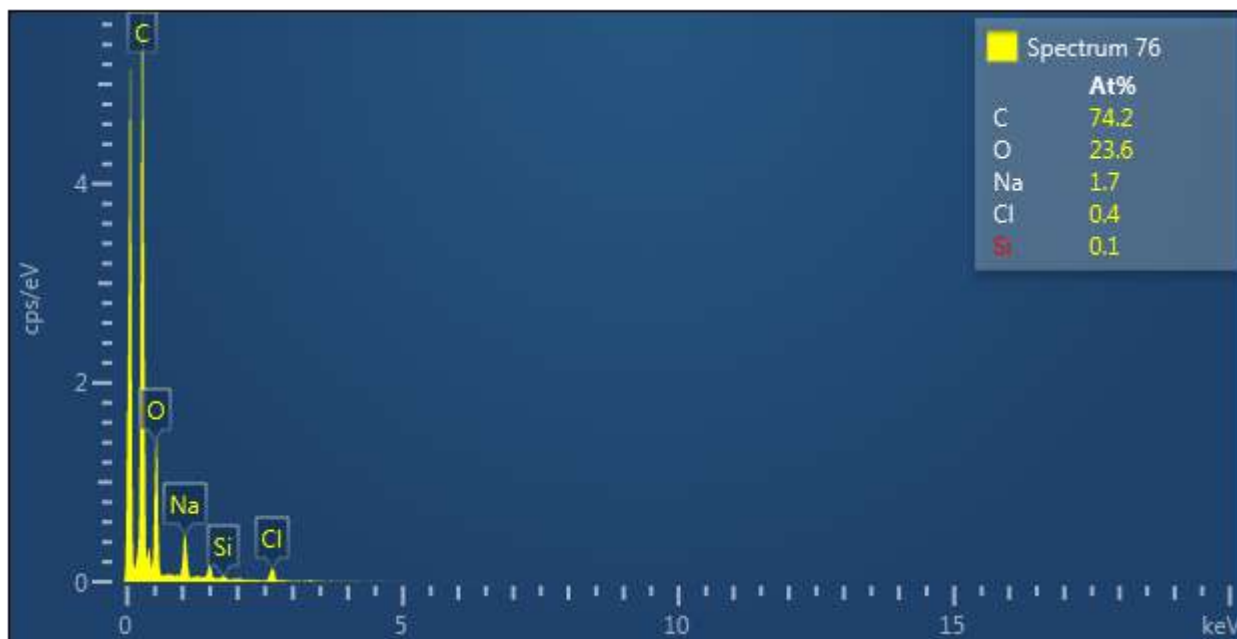

|                                 |                     |
|---------------------------------|---------------------|
| Label:                          | Spectrum 76         |
| Source:                         | Acquired            |
| Created:                        | 23/01/2020 12:51:31 |
| Livetime:                       | 60.3s               |
| Process Time:                   | 4                   |
| Accelerating Voltage:           | 15.00kV             |
| Magnification:                  | 35 x                |
| Working Distance:               | 10.0mm              |
| Specimen Tilt (degrees):        | 0.0                 |
| Elevation (degrees):            | 35.0                |
| Azimuth (degrees):              | 0.0                 |
| Number Of Channels:             | 2048                |
| Energy Range (keV):             | 20 keV              |
| Energy per Channel (eV):        | 10.0eV              |
| Detector Type Id:               | 29                  |
| Detector Type:                  | X-Max               |
| Window Type:                    | SATW                |
| Pulse Pile Up Correction:       | Succeeded           |
| Primary Detector:               | 2617                |
| Primary Detector Serial Number: | 77871-X080          |

| Element | Line Type | Apparent Concentration | k Ratio | Wt%   | Wt% Sigma | Atomic % | Standard Label | Factory Standard | Standard Calibration Date |
|---------|-----------|------------------------|---------|-------|-----------|----------|----------------|------------------|---------------------------|
| C       | K series  | 9.03                   | 0.09032 | 67.31 | 0.54      | 74.24    | C Vit          | Yes              |                           |
| O       | K series  | 4.08                   | 0.01373 | 28.47 | 0.54      | 23.57    | SiO2           | Yes              |                           |
| Na      | K         | 0.77                   | 0.0032  | 2.92  | 0.13      | 1.68     | Albite         | Yes              |                           |

|        |          |      |         |        |      |        |                  |     |  |
|--------|----------|------|---------|--------|------|--------|------------------|-----|--|
|        | series   |      | 4       |        |      |        |                  |     |  |
| Si     | K series | 0.05 | 0.00037 | 0.21   | 0.04 | 0.10   | SiO <sub>2</sub> | Yes |  |
| Cl     | K series | 0.23 | 0.00200 | 1.09   | 0.07 | 0.41   | NaCl             | Yes |  |
| Total: |          |      |         | 100.00 |      | 100.00 |                  |     |  |

Electron Image 25

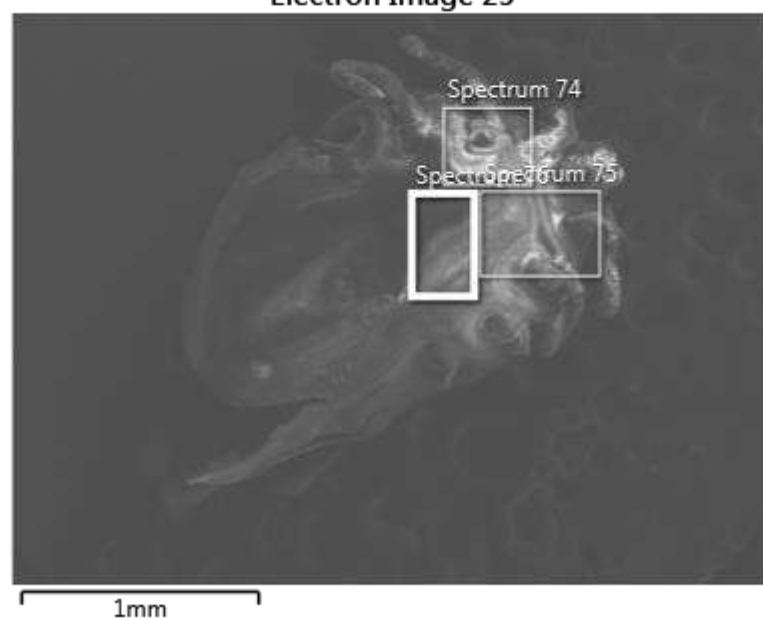

23/01/2020 12:53:29

Project 1

Rumania 8

Ventral 1 15 Kv

Electron Image 26

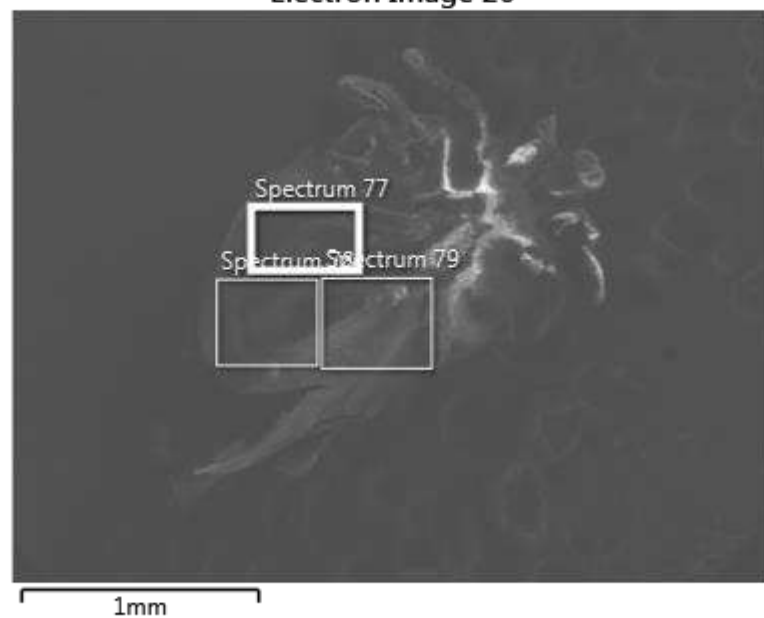

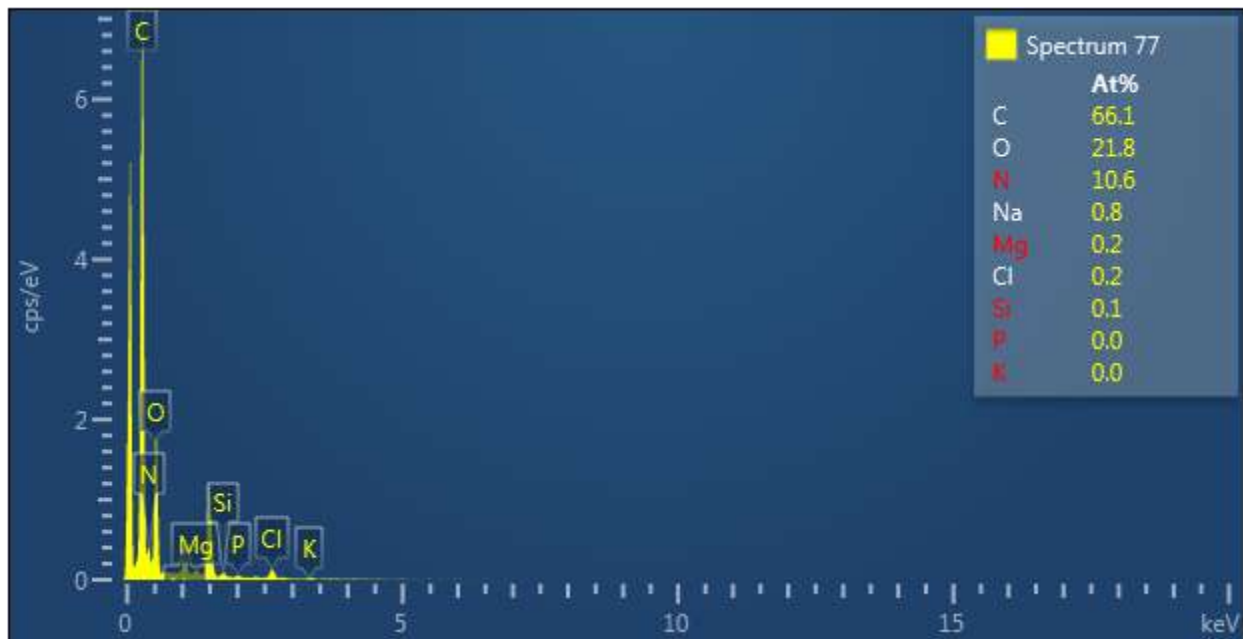

|                                 |                     |
|---------------------------------|---------------------|
| Label:                          | Spectrum 77         |
| Source:                         | Acquired            |
| Created:                        | 23/01/2020 12:53:29 |
| Livetime:                       | 60.5s               |
| Process Time:                   | 4                   |
| Accelerating Voltage:           | 15.00kV             |
| Magnification:                  | 35 x                |
| Working Distance:               | 10.0mm              |
| Specimen Tilt (degrees):        | 0.0                 |
| Elevation (degrees):            | 35.0                |
| Azimuth (degrees):              | 0.0                 |
| Number Of Channels:             | 2048                |
| Energy Range (keV):             | 20 keV              |
| Energy per Channel (eV):        | 10.0eV              |
| Detector Type Id:               | 29                  |
| Detector Type:                  | X-Max               |
| Window Type:                    | SATW                |
| Pulse Pile Up Correction:       | Succeeded           |
| Primary Detector:               | 2617                |
| Primary Detector Serial Number: | 77871-X080          |

| Element | Line Type | Apparent Concentration | k Ratio | Wt%   | Wt% Sigma | Atomic % | Standard Label | Factory Standard | Standard Calibration Date |
|---------|-----------|------------------------|---------|-------|-----------|----------|----------------|------------------|---------------------------|
| C       | K series  | 12.84                  | 0.12841 | 59.67 | 1.07      | 66.11    | C Vit          | Yes              |                           |
| N       | K series  | 2.52                   | 0.00448 | 11.12 | 1.41      | 10.57    | BN             | Yes              |                           |
| O       | K         | 5.14                   | 0.0172  | 26.19 | 0.63      | 21.79    | SiO2           | Yes              |                           |



|        |          |      |         |        |      |        |                  |     |  |
|--------|----------|------|---------|--------|------|--------|------------------|-----|--|
|        | series   |      | 9       |        |      |        |                  |     |  |
| Na     | K series | 0.57 | 0.00242 | 1.45   | 0.08 | 0.84   | Albite           | Yes |  |
| Mg     | K series | 0.14 | 0.00092 | 0.44   | 0.05 | 0.24   | MgO              | Yes |  |
| Si     | K series | 0.10 | 0.00077 | 0.29   | 0.04 | 0.14   | SiO <sub>2</sub> | Yes |  |
| P      | K series | 0.06 | 0.00031 | 0.11   | 0.03 | 0.05   | GaP              | Yes |  |
| Cl     | K series | 0.20 | 0.00172 | 0.61   | 0.05 | 0.23   | NaCl             | Yes |  |
| K      | K series | 0.04 | 0.00034 | 0.12   | 0.03 | 0.04   | KBr              | Yes |  |
| Total: |          |      |         | 100.00 |      | 100.00 |                  |     |  |

Electron Image 26

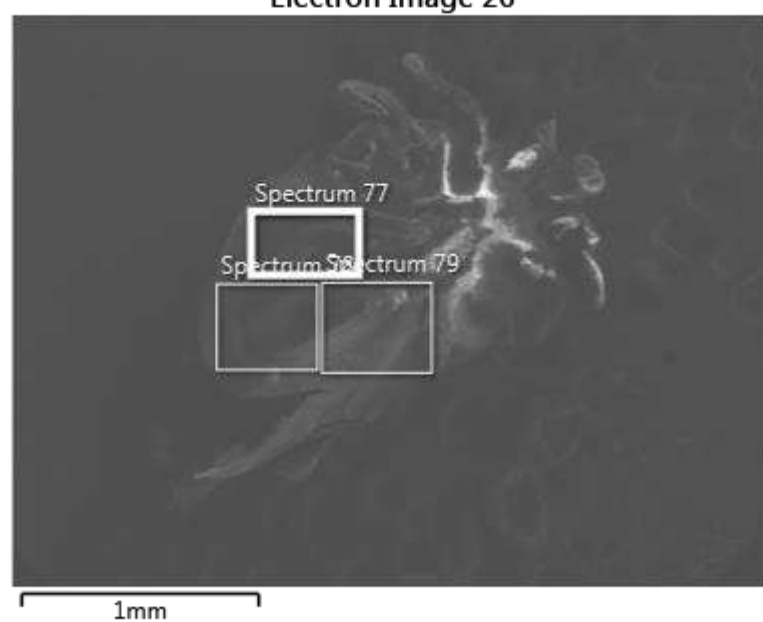

23/01/2020 12:54:42

Project 1

Rumania 8

Ventral 1 15 Kv

Electron Image 26

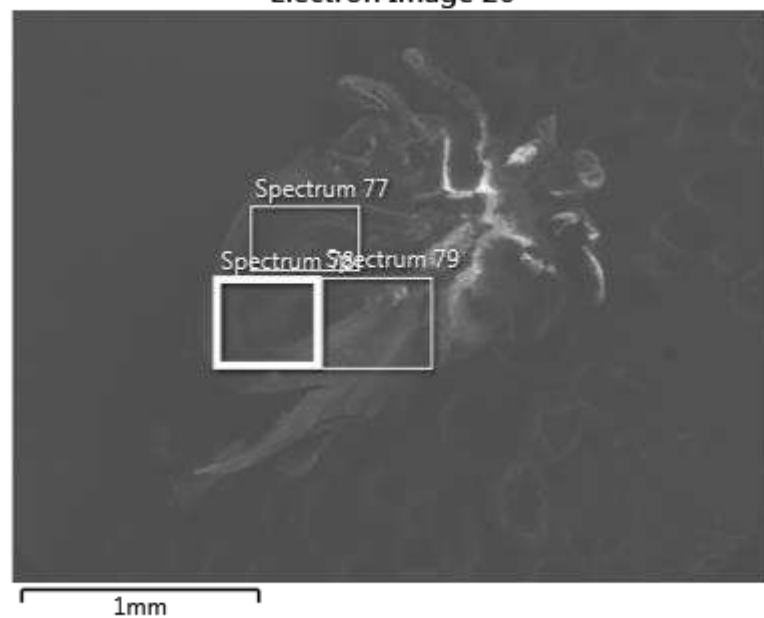

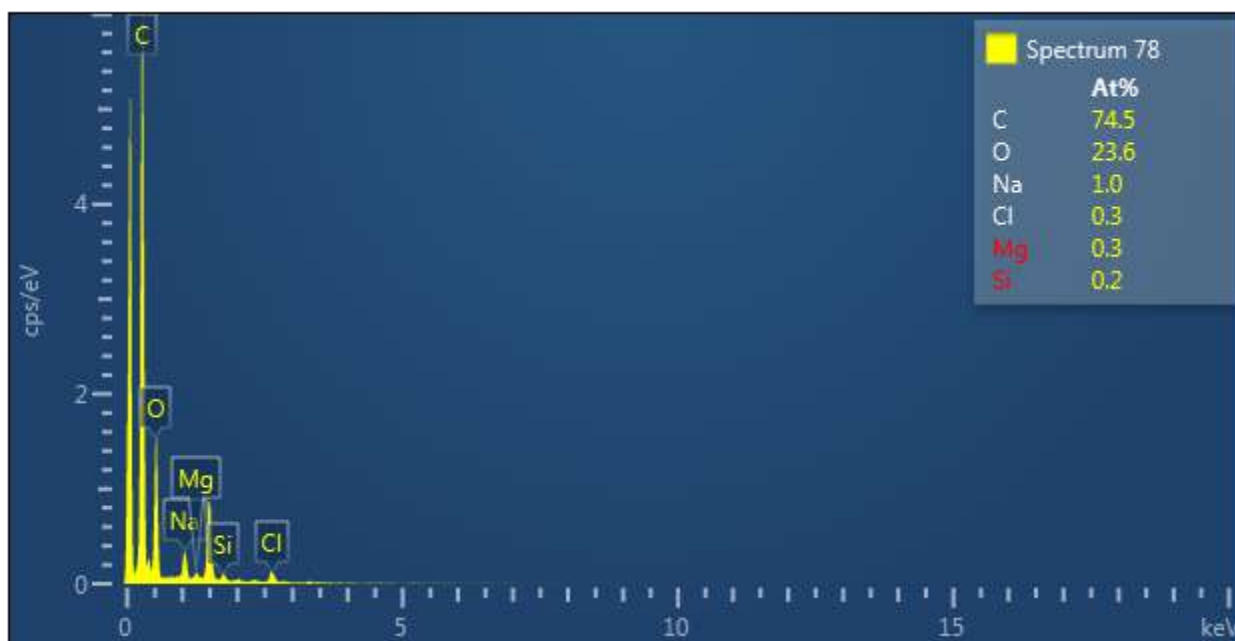

|                                 |                     |
|---------------------------------|---------------------|
| Label:                          | Spectrum 78         |
| Source:                         | Acquired            |
| Created:                        | 23/01/2020 12:54:42 |
| Livetime:                       | 60.2s               |
| Process Time:                   | 4                   |
| Accelerating Voltage:           | 15.00kV             |
| Magnification:                  | 35 x                |
| Working Distance:               | 10.0mm              |
| Specimen Tilt (degrees):        | 0.0                 |
| Elevation (degrees):            | 35.0                |
| Azimuth (degrees):              | 0.0                 |
| Number Of Channels:             | 2048                |
| Energy Range (keV):             | 20 keV              |
| Energy per Channel (eV):        | 10.0eV              |
| Detector Type Id:               | 29                  |
| Detector Type:                  | X-Max               |
| Window Type:                    | SATW                |
| Pulse Pile Up Correction:       | Succeeded           |
| Primary Detector:               | 2617                |
| Primary Detector Serial Number: | 77871-X080          |

| Element | Line Type | Apparent Concentration | k Ratio | Wt%   | Wt% Sigma | Atomic % | Standard Label | Factory Standard | Standard Calibration Date |
|---------|-----------|------------------------|---------|-------|-----------|----------|----------------|------------------|---------------------------|
| C       | K series  | 9.67                   | 0.09673 | 67.74 | 0.53      | 74.52    | C Vit          | Yes              |                           |
| O       | K series  | 4.27                   | 0.01437 | 28.61 | 0.52      | 23.63    | SiO2           | Yes              |                           |
| Na      | K         | 0.49                   | 0.0020  | 1.78  | 0.11      | 1.02     | Albite         | Yes              |                           |

|        |          |      |         |        |      |        |                  |     |  |
|--------|----------|------|---------|--------|------|--------|------------------|-----|--|
|        | series   |      | 6       |        |      |        |                  |     |  |
| Mg     | K series | 0.11 | 0.00073 | 0.50   | 0.06 | 0.27   | MgO              | Yes |  |
| Si     | K series | 0.12 | 0.00091 | 0.50   | 0.05 | 0.23   | SiO <sub>2</sub> | Yes |  |
| Cl     | K series | 0.19 | 0.00167 | 0.87   | 0.07 | 0.33   | NaCl             | Yes |  |
| Total: |          |      |         | 100.00 |      | 100.00 |                  |     |  |

Electron Image 26

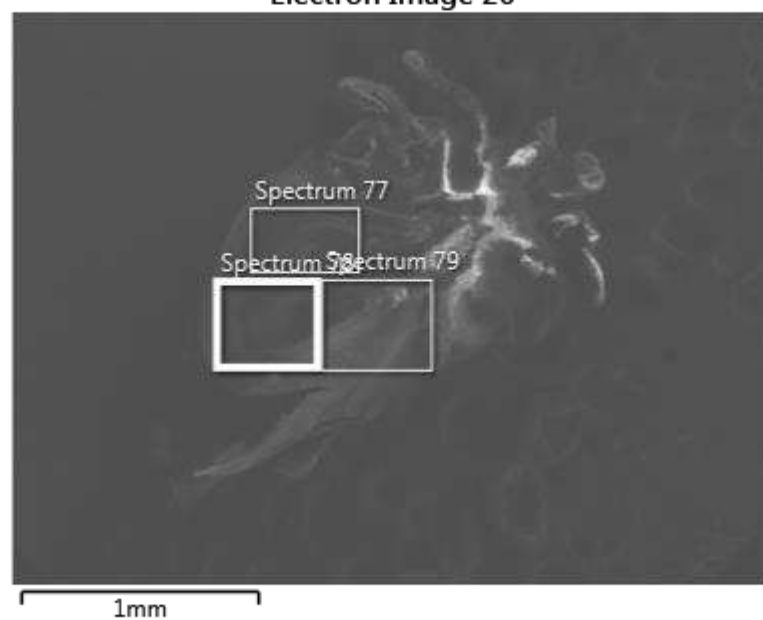

23/01/2020 12:55:53

Project 1

Rumania 8

Ventral 1 15 Kv

Electron Image 26

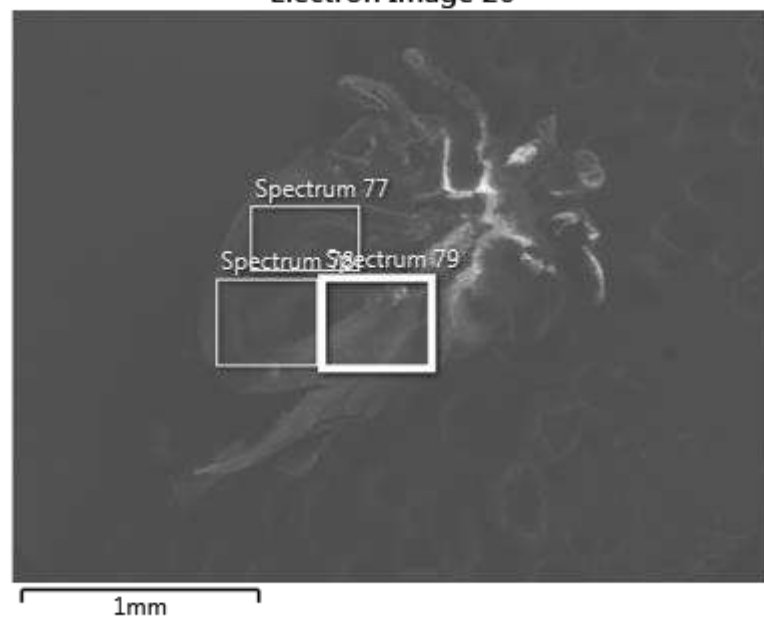

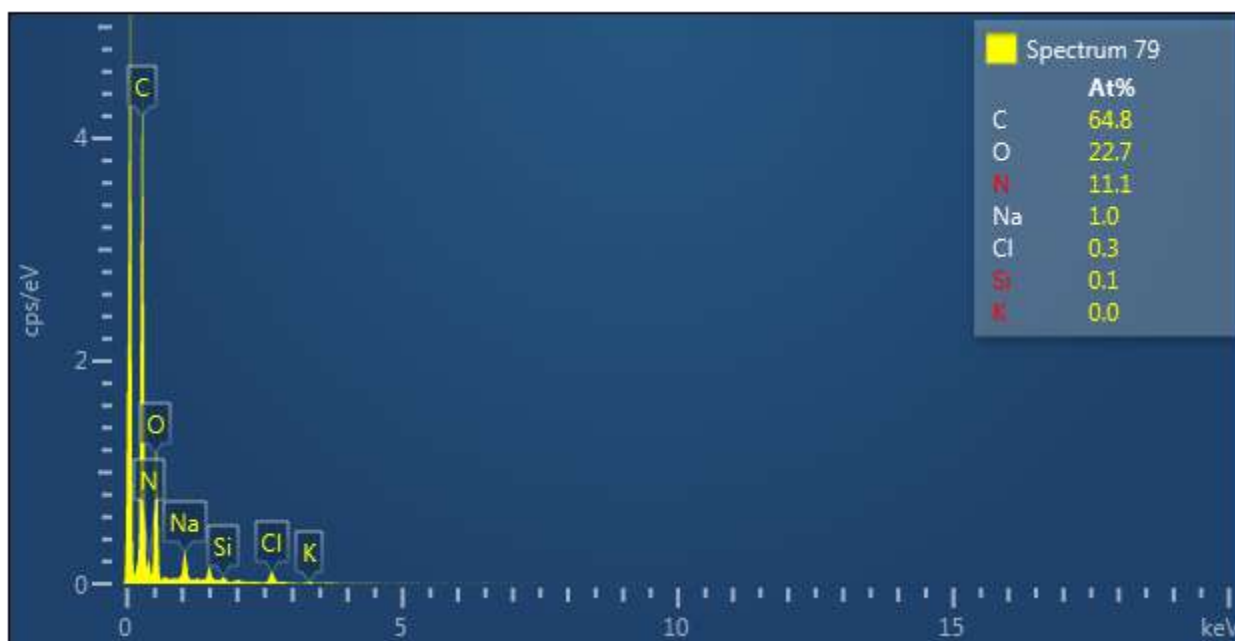

|                                 |                     |
|---------------------------------|---------------------|
| Label:                          | Spectrum 79         |
| Source:                         | Acquired            |
| Created:                        | 23/01/2020 12:55:53 |
| Livetime:                       | 60.3s               |
| Process Time:                   | 4                   |
| Accelerating Voltage:           | 15.00kV             |
| Magnification:                  | 35 x                |
| Working Distance:               | 10.0mm              |
| Specimen Tilt (degrees):        | 0.0                 |
| Elevation (degrees):            | 35.0                |
| Azimuth (degrees):              | 0.0                 |
| Number Of Channels:             | 2048                |
| Energy Range (keV):             | 20 keV              |
| Energy per Channel (eV):        | 10.0eV              |
| Detector Type Id:               | 29                  |
| Detector Type:                  | X-Max               |
| Window Type:                    | SATW                |
| Pulse Pile Up Correction:       | Succeeded           |
| Primary Detector:               | 2617                |
| Primary Detector Serial Number: | 77871-X080          |

| Element | Line Type | Apparent Concentration | k Ratio | Wt%   | Wt% Sigma | Atomic % | Standard Label | Factory Standard | Standard Calibration Date |
|---------|-----------|------------------------|---------|-------|-----------|----------|----------------|------------------|---------------------------|
| C       | K series  | 7.93                   | 0.07932 | 58.27 | 1.21      | 64.76    | C Vit          | Yes              |                           |
| N       | K series  | 1.72                   | 0.00307 | 11.63 | 1.59      | 11.08    | BN             | Yes              |                           |
| O       | K         | 3.44                   | 0.0115  | 27.21 | 0.76      | 22.70    | SiO2           | Yes              |                           |

|        |          |      |         |        |      |        |                  |     |  |
|--------|----------|------|---------|--------|------|--------|------------------|-----|--|
|        | series   |      | 9       |        |      |        |                  |     |  |
| Na     | K series | 0.43 | 0.00180 | 1.70   | 0.11 | 0.99   | Albite           | Yes |  |
| Si     | K series | 0.05 | 0.00040 | 0.23   | 0.04 | 0.11   | SiO <sub>2</sub> | Yes |  |
| Cl     | K series | 0.17 | 0.00148 | 0.82   | 0.07 | 0.31   | NaCl             | Yes |  |
| K      | K series | 0.03 | 0.00024 | 0.13   | 0.04 | 0.05   | KBr              | Yes |  |
| Total: |          |      |         | 100.00 |      | 100.00 |                  |     |  |

Electron Image 26

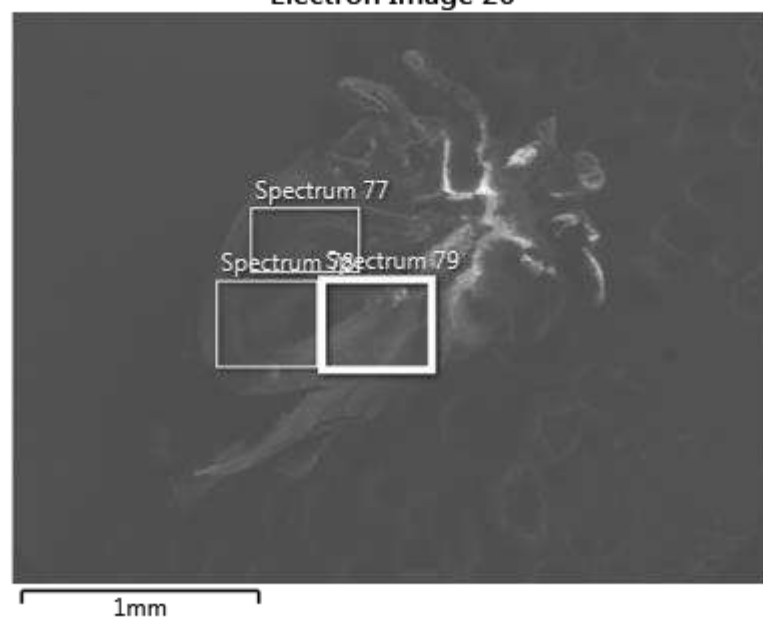

23/01/2020 12:58:48

Project 1

Rumania 9

Pecho 1 15 Kv

Electron Image 27

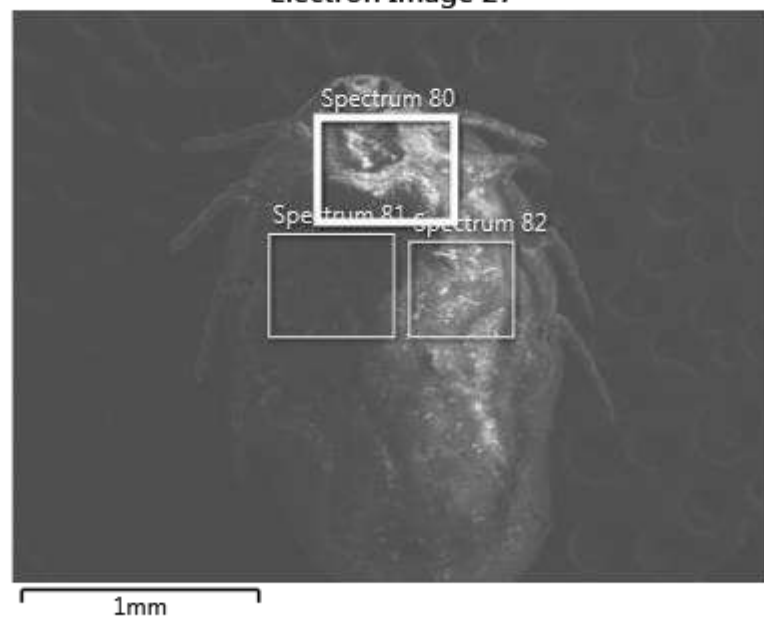



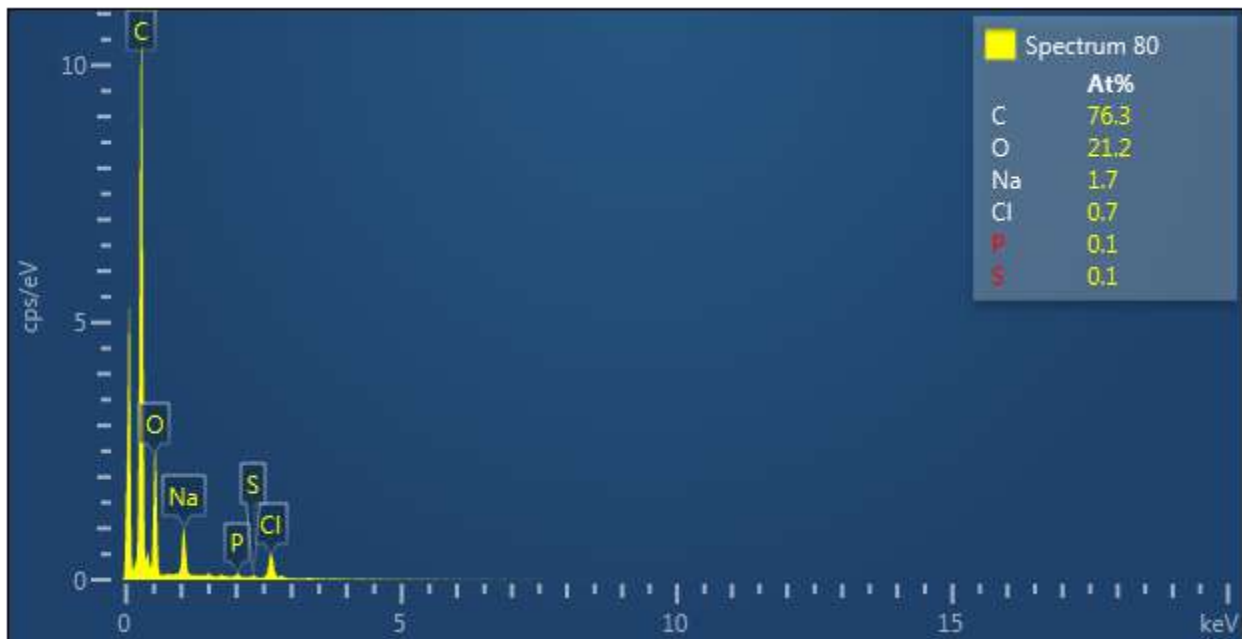

|                                 |                     |
|---------------------------------|---------------------|
| Label:                          | Spectrum 80         |
| Source:                         | Acquired            |
| Created:                        | 23/01/2020 12:58:48 |
| Livetime:                       | 60.4s               |
| Process Time:                   | 4                   |
| Accelerating Voltage:           | 15.00kV             |
| Magnification:                  | 35 x                |
| Working Distance:               | 10.0mm              |
| Specimen Tilt (degrees):        | 0.0                 |
| Elevation (degrees):            | 35.0                |
| Azimuth (degrees):              | 0.0                 |
| Number Of Channels:             | 2048                |
| Energy Range (keV):             | 20 keV              |
| Energy per Channel (eV):        | 10.0eV              |
| Detector Type Id:               | 29                  |
| Detector Type:                  | X-Max               |
| Window Type:                    | SATW                |
| Pulse Pile Up Correction:       | Succeeded           |
| Primary Detector:               | 2617                |
| Primary Detector Serial Number: | 77871-X080          |

| Element | Line Type | Apparent Concentration | k Ratio | Wt%   | Wt% Sigma | Atomic % | Standard Label | Factory Standard | Standard Calibration Date |
|---------|-----------|------------------------|---------|-------|-----------|----------|----------------|------------------|---------------------------|
| C       | K series  | 17.27                  | 0.17274 | 69.22 | 0.38      | 76.29    | C Vit          | Yes              |                           |
| O       | K series  | 7.15                   | 0.02405 | 25.56 | 0.38      | 21.15    | SiO2           | Yes              |                           |
| Na      | K         | 1.58                   | 0.0066  | 2.91  | 0.09      | 1.67     | Albite         | Yes              |                           |

|        |          |      |         |        |      |        |      |     |  |
|--------|----------|------|---------|--------|------|--------|------|-----|--|
|        | series   |      | 7       |        |      |        |      |     |  |
| P      | K series | 0.15 | 0.00084 | 0.23   | 0.04 | 0.10   | GaP  | Yes |  |
| S      | K series | 0.07 | 0.00059 | 0.15   | 0.03 | 0.06   | FeS2 | Yes |  |
| Cl     | K series | 0.82 | 0.00719 | 1.93   | 0.07 | 0.72   | NaCl | Yes |  |
| Total: |          |      |         | 100.00 |      | 100.00 |      |     |  |

Electron Image 27

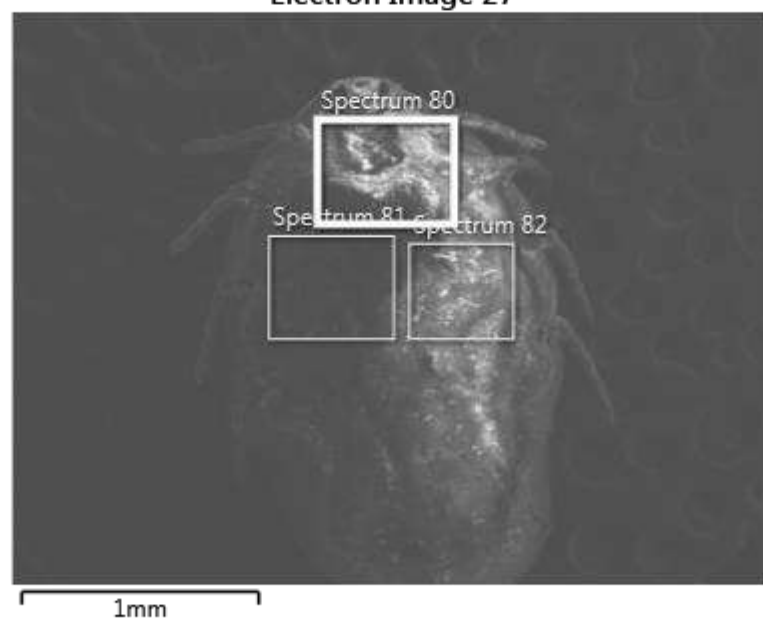

23/01/2020 12:59:58

Project 1

Rumania 9

Pecho 1 15 Kv

Electron Image 27

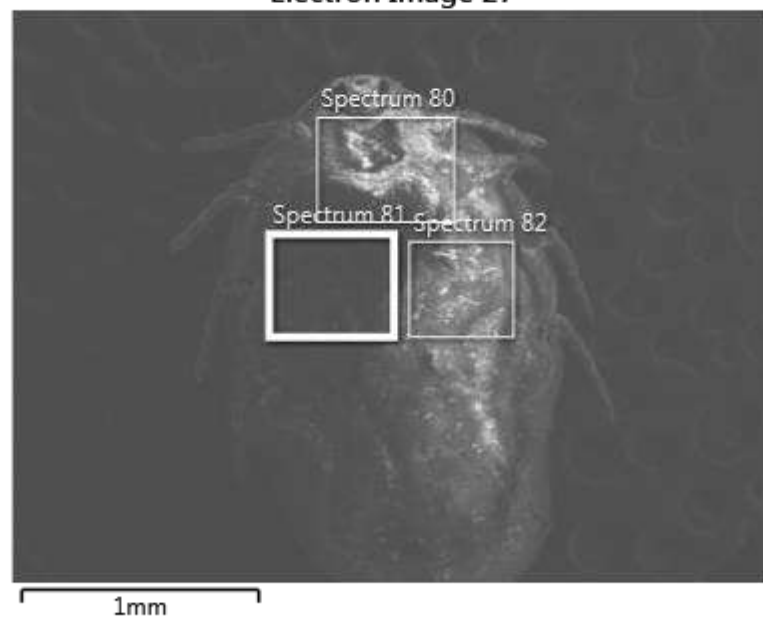

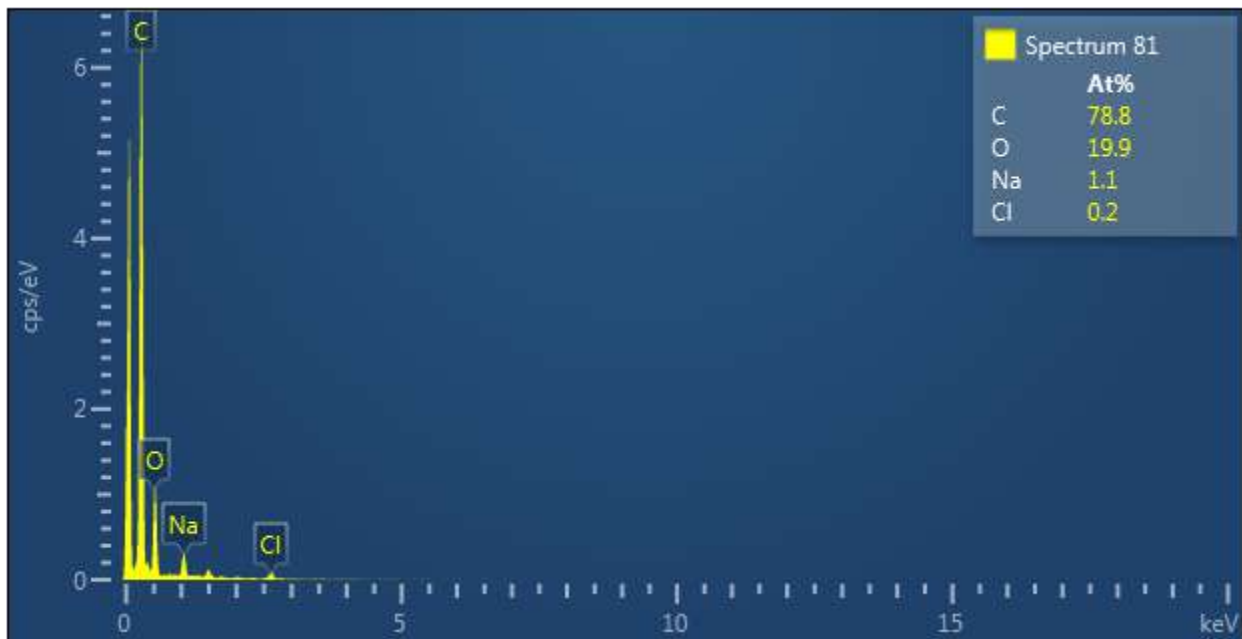

|                                 |                     |
|---------------------------------|---------------------|
| Label:                          | Spectrum 81         |
| Source:                         | Acquired            |
| Created:                        | 23/01/2020 12:59:58 |
| Livetime:                       | 60.3s               |
| Process Time:                   | 4                   |
| Accelerating Voltage:           | 15.00kV             |
| Magnification:                  | 35 x                |
| Working Distance:               | 10.0mm              |
| Specimen Tilt (degrees):        | 0.0                 |
| Elevation (degrees):            | 35.0                |
| Azimuth (degrees):              | 0.0                 |
| Number Of Channels:             | 2048                |
| Energy Range (keV):             | 20 keV              |
| Energy per Channel (eV):        | 10.0eV              |
| Detector Type Id:               | 29                  |
| Detector Type:                  | X-Max               |
| Window Type:                    | SATW                |
| Pulse Pile Up Correction:       | Succeeded           |
| Primary Detector:               | 2617                |
| Primary Detector Serial Number: | 77871-X080          |

| Element | Line Type | Apparent Concentration | k Ratio | Wt%   | Wt% Sigma | Atomic % | Standard Label | Factory Standard | Standard Calibration Date |
|---------|-----------|------------------------|---------|-------|-----------|----------|----------------|------------------|---------------------------|
| C       | K series  | 10.70                  | 0.10699 | 72.93 | 0.53      | 78.79    | C Vit          | Yes              |                           |
| O       | K series  | 3.14                   | 0.01058 | 24.55 | 0.53      | 19.91    | SiO2           | Yes              |                           |
| Na      | K         | 0.48                   | 0.0020  | 1.88  | 0.11      | 1.06     | Albite         | Yes              |                           |

|        |          |      |         |        |      |        |      |     |  |
|--------|----------|------|---------|--------|------|--------|------|-----|--|
|        | series   |      | 3       |        |      |        |      |     |  |
| Cl     | K series | 0.13 | 0.00113 | 0.64   | 0.06 | 0.23   | NaCl | Yes |  |
| Total: |          |      |         | 100.00 |      | 100.00 |      |     |  |

Electron Image 27

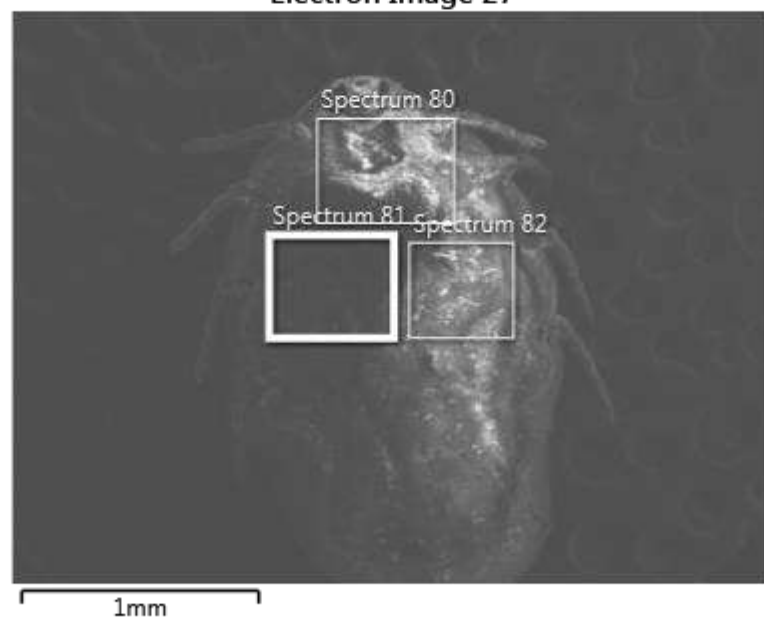

23/01/2020 13:01:08

Project 1

Rumania 9

Pecho 1 15 Kv

Electron Image 27

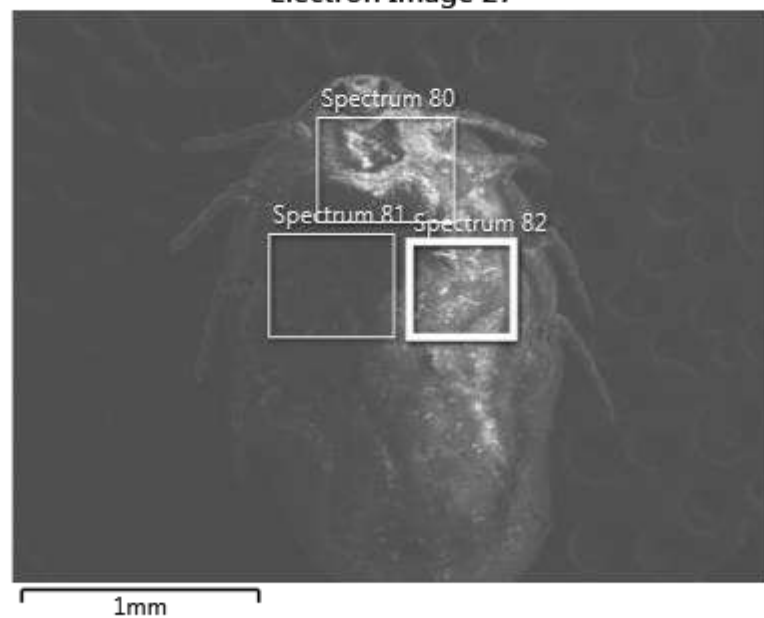

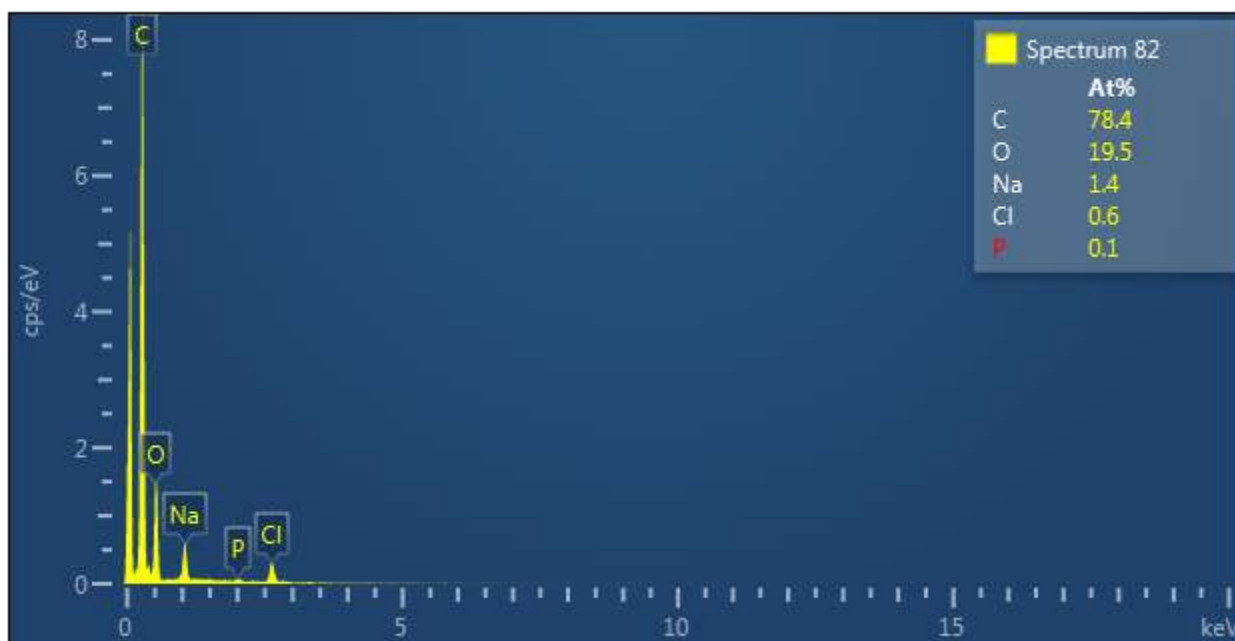

|                                 |                     |
|---------------------------------|---------------------|
| Label:                          | Spectrum 82         |
| Source:                         | Acquired            |
| Created:                        | 23/01/2020 13:01:08 |
| Livetime:                       | 60.3s               |
| Process Time:                   | 4                   |
| Accelerating Voltage:           | 15.00kV             |
| Magnification:                  | 35 x                |
| Working Distance:               | 10.0mm              |
| Specimen Tilt (degrees):        | 0.0                 |
| Elevation (degrees):            | 35.0                |
| Azimuth (degrees):              | 0.0                 |
| Number Of Channels:             | 2048                |
| Energy Range (keV):             | 20 keV              |
| Energy per Channel (eV):        | 10.0eV              |
| Detector Type Id:               | 29                  |
| Detector Type:                  | X-Max               |
| Window Type:                    | SATW                |
| Pulse Pile Up Correction:       | Succeeded           |
| Primary Detector:               | 2617                |
| Primary Detector Serial Number: | 77871-X080          |

| Element | Line Type | Apparent Concentration | k Ratio | Wt%   | Wt% Sigma | Atomic % | Standard Label | Factory Standard | Standard Calibration Date |
|---------|-----------|------------------------|---------|-------|-----------|----------|----------------|------------------|---------------------------|
| C       | K series  | 13.37                  | 0.13367 | 71.88 | 0.44      | 78.40    | C Vit          | Yes              |                           |
| O       | K series  | 4.47                   | 0.01505 | 23.85 | 0.44      | 19.53    | SiO2           | Yes              |                           |
| Na      | K         | 0.92                   | 0.0038  | 2.44  | 0.10      | 1.39     | Albite         | Yes              |                           |

|        |          |      |         |        |      |        |      |     |  |
|--------|----------|------|---------|--------|------|--------|------|-----|--|
|        | series   |      | 9       |        |      |        |      |     |  |
| P      | K series | 0.08 | 0.00043 | 0.17   | 0.04 | 0.07   | GaP  | Yes |  |
| Cl     | K series | 0.49 | 0.00432 | 1.67   | 0.08 | 0.62   | NaCl | Yes |  |
| Total: |          |      |         | 100.00 |      | 100.00 |      |     |  |

Electron Image 27

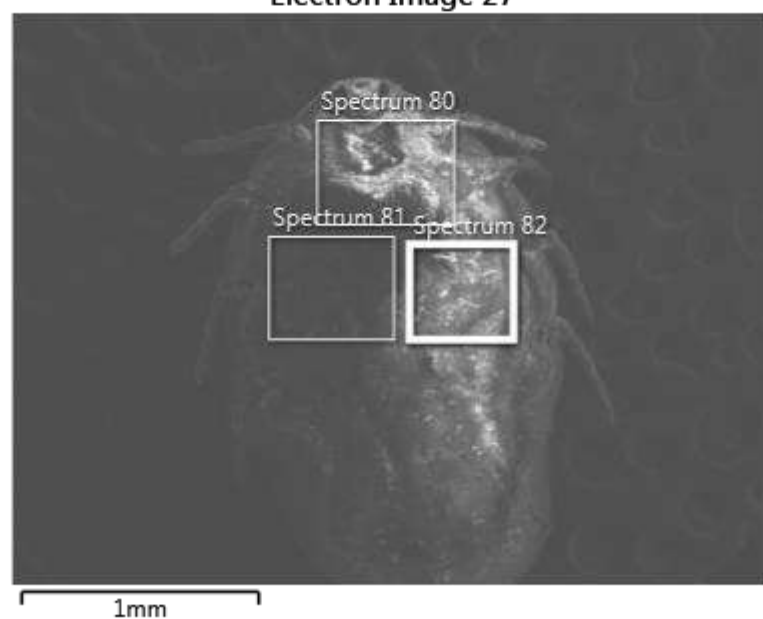



23/01/2020 13:03:06

Project 1

Rumania 9

Ventral 1 15 Kv

Electron Image 28

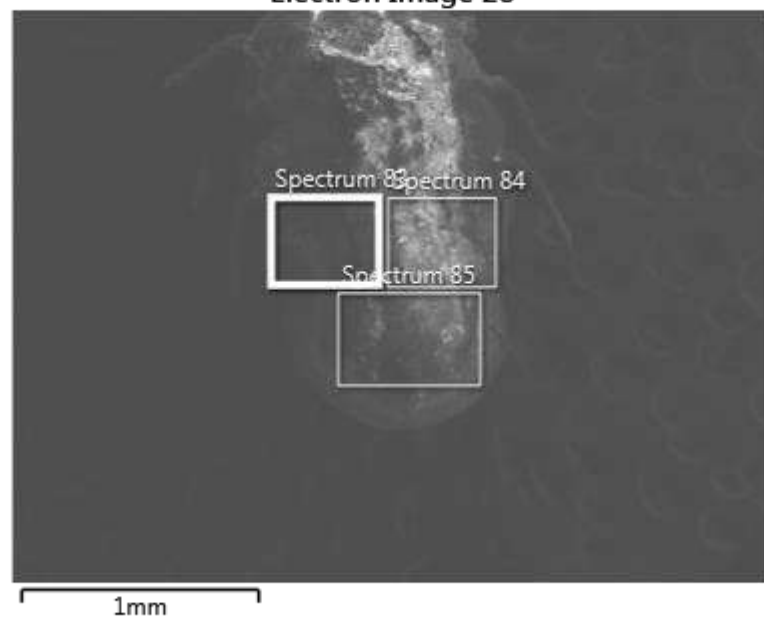

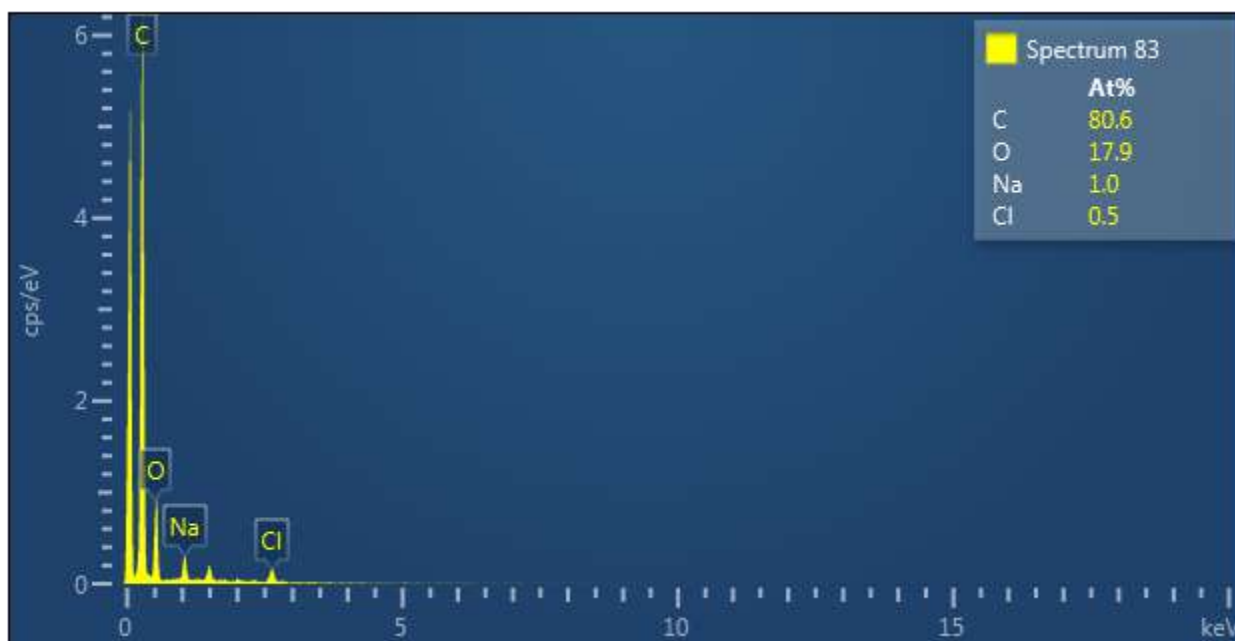

|                                 |                     |
|---------------------------------|---------------------|
| Label:                          | Spectrum 83         |
| Source:                         | Acquired            |
| Created:                        | 23/01/2020 13:03:06 |
| Livetime:                       | 60.0s               |
| Process Time:                   | 4                   |
| Accelerating Voltage:           | 15.00kV             |
| Magnification:                  | 35 x                |
| Working Distance:               | 10.0mm              |
| Specimen Tilt (degrees):        | 0.0                 |
| Elevation (degrees):            | 35.0                |
| Azimuth (degrees):              | 0.0                 |
| Number Of Channels:             | 2048                |
| Energy Range (keV):             | 20 keV              |
| Energy per Channel (eV):        | 10.0eV              |
| Detector Type Id:               | 29                  |
| Detector Type:                  | X-Max               |
| Window Type:                    | SATW                |
| Pulse Pile Up Correction:       | Succeeded           |
| Primary Detector:               | 2617                |
| Primary Detector Serial Number: | 77871-X080          |

| Element | Line Type | Apparent Concentration | k Ratio | Wt%   | Wt% Sigma | Atomic % | Standard Label | Factory Standard | Standard Calibration Date |
|---------|-----------|------------------------|---------|-------|-----------|----------|----------------|------------------|---------------------------|
| C       | K series  | 9.91                   | 0.09911 | 74.76 | 0.53      | 80.60    | C Vit          | Yes              |                           |
| O       | K series  | 2.62                   | 0.00882 | 22.13 | 0.53      | 17.91    | SiO2           | Yes              |                           |
| Na      | K         | 0.45                   | 0.0018  | 1.80  | 0.11      | 1.02     | Albite         | Yes              |                           |

|        |          |      |         |        |      |        |      |     |  |
|--------|----------|------|---------|--------|------|--------|------|-----|--|
|        | series   |      | 9       |        |      |        |      |     |  |
| Cl     | K series | 0.25 | 0.00221 | 1.30   | 0.09 | 0.48   | NaCl | Yes |  |
| Total: |          |      |         | 100.00 |      | 100.00 |      |     |  |

Electron Image 28

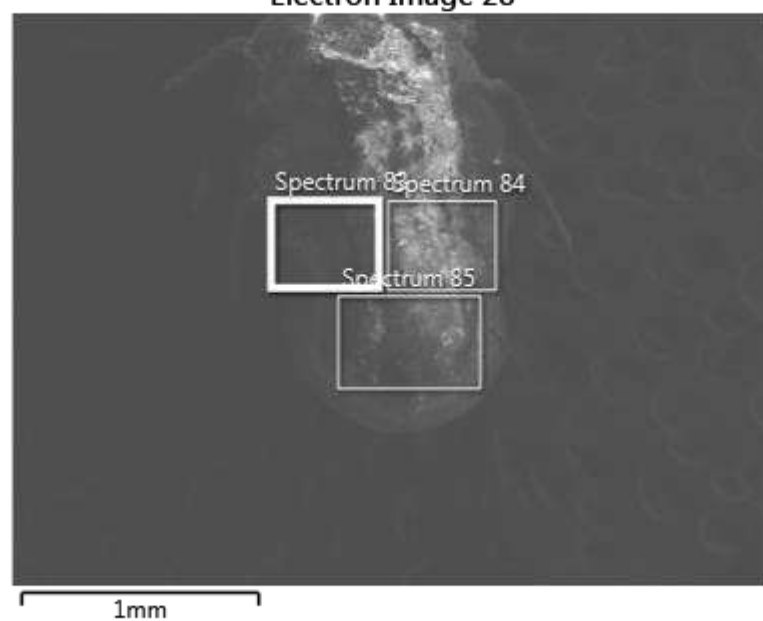

23/01/2020 13:04:17

Project 1

Rumania 9

Ventral 1 15 Kv

Electron Image 28

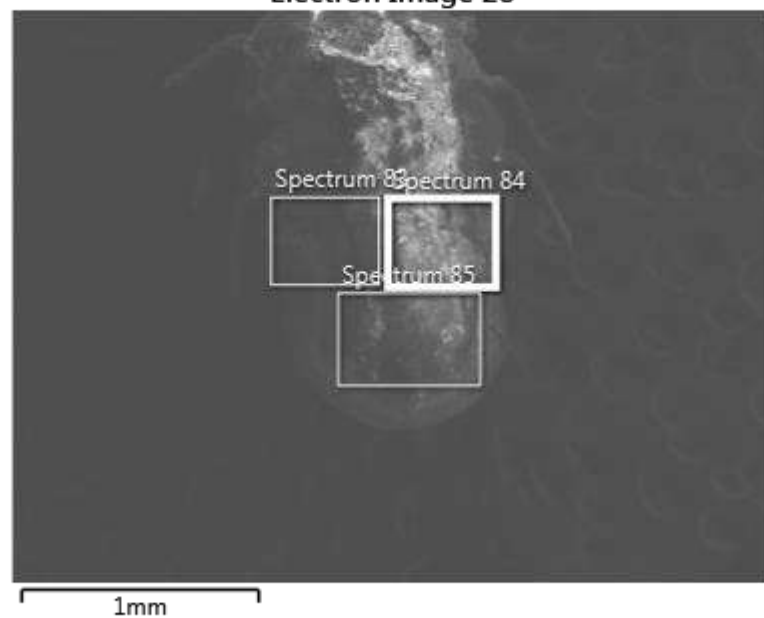

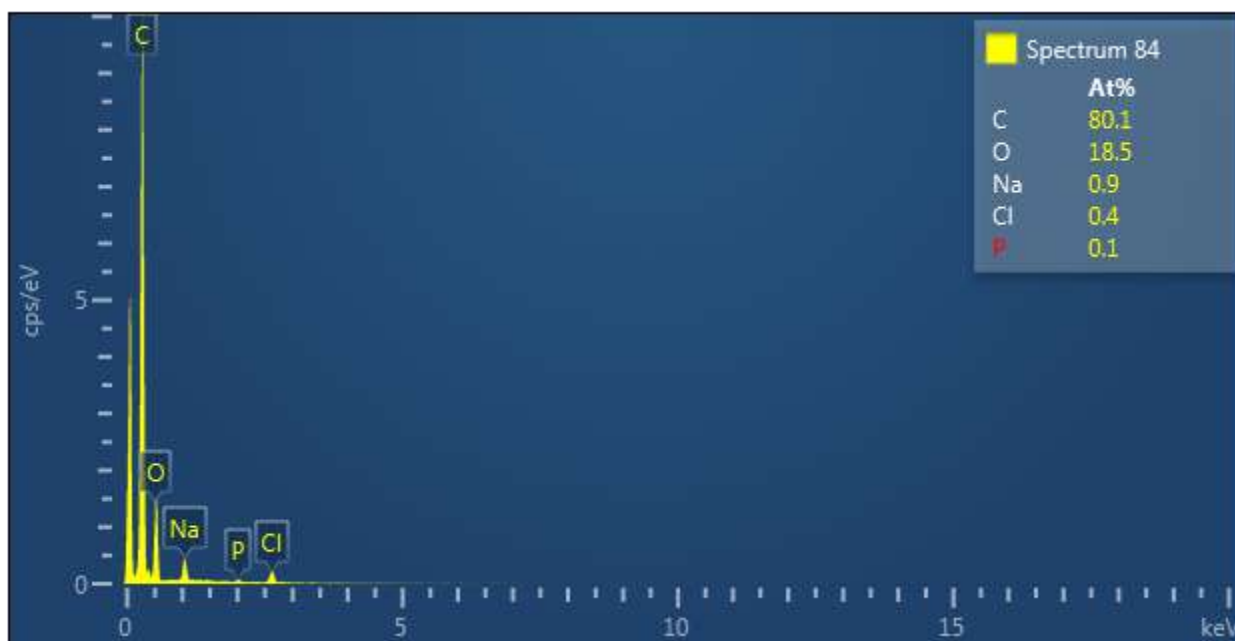

|                                 |                     |
|---------------------------------|---------------------|
| Label:                          | Spectrum 84         |
| Source:                         | Acquired            |
| Created:                        | 23/01/2020 13:04:17 |
| Livetime:                       | 60.4s               |
| Process Time:                   | 4                   |
| Accelerating Voltage:           | 15.00kV             |
| Magnification:                  | 35 x                |
| Working Distance:               | 10.0mm              |
| Specimen Tilt (degrees):        | 0.0                 |
| Elevation (degrees):            | 35.0                |
| Azimuth (degrees):              | 0.0                 |
| Number Of Channels:             | 2048                |
| Energy Range (keV):             | 20 keV              |
| Energy per Channel (eV):        | 10.0eV              |
| Detector Type Id:               | 29                  |
| Detector Type:                  | X-Max               |
| Window Type:                    | SATW                |
| Pulse Pile Up Correction:       | Succeeded           |
| Primary Detector:               | 2617                |
| Primary Detector Serial Number: | 77871-X080          |

| Element | Line Type | Apparent Concentration | k Ratio | Wt%   | Wt% Sigma | Atomic % | Standard Label | Factory Standard | Standard Calibration Date |
|---------|-----------|------------------------|---------|-------|-----------|----------|----------------|------------------|---------------------------|
| C       | K series  | 15.83                  | 0.15835 | 74.22 | 0.42      | 80.10    | C Vit          | Yes              |                           |
| O       | K series  | 4.36                   | 0.01468 | 22.81 | 0.42      | 18.48    | SiO2           | Yes              |                           |
| Na      | K         | 0.66                   | 0.0027  | 1.67  | 0.08      | 0.94     | Albite         | Yes              |                           |

|        |          |      |         |        |      |        |      |     |  |
|--------|----------|------|---------|--------|------|--------|------|-----|--|
|        | series   |      | 9       |        |      |        |      |     |  |
| P      | K series | 0.08 | 0.00046 | 0.17   | 0.04 | 0.07   | GaP  | Yes |  |
| Cl     | K series | 0.35 | 0.00302 | 1.12   | 0.06 | 0.41   | NaCl | Yes |  |
| Total: |          |      |         | 100.00 |      | 100.00 |      |     |  |

Electron Image 28

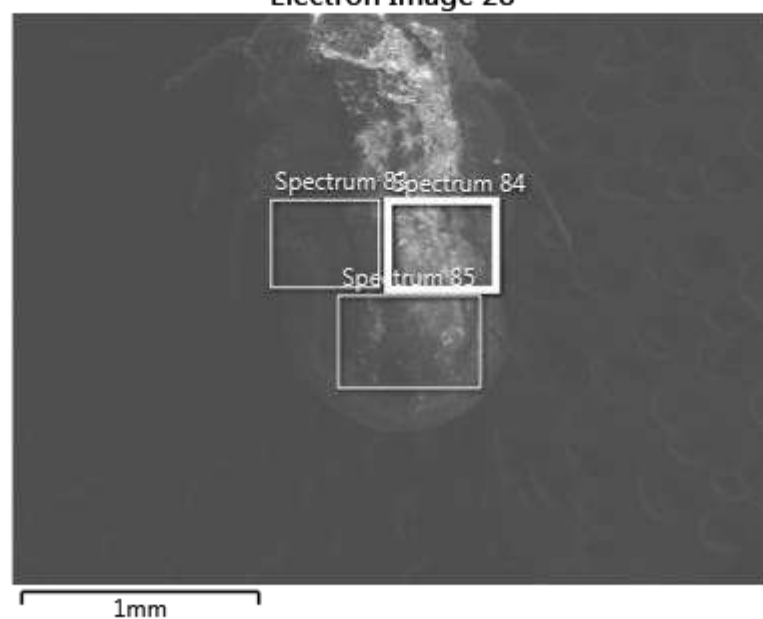

23/01/2020 13:05:30

Project 1

Rumania 9

Ventral 1 15 Kv

Electron Image 28

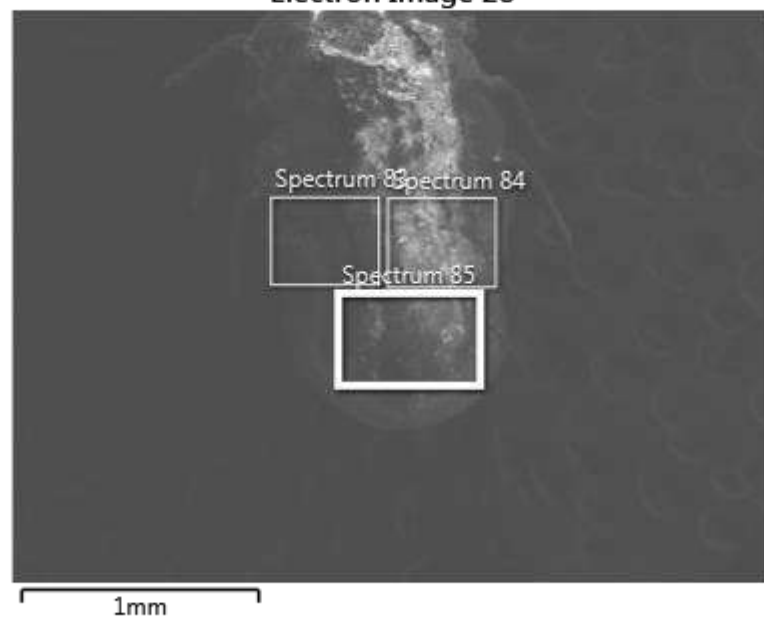

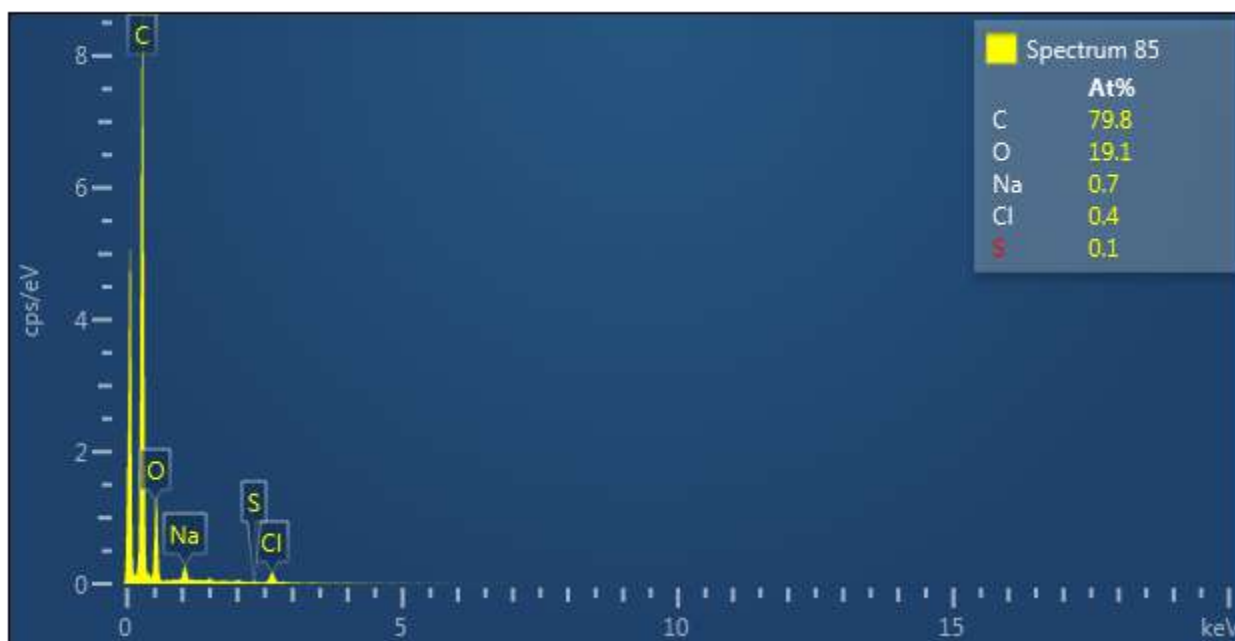

|                                 |                     |
|---------------------------------|---------------------|
| Label:                          | Spectrum 85         |
| Source:                         | Acquired            |
| Created:                        | 23/01/2020 13:05:30 |
| Livetime:                       | 60.4s               |
| Process Time:                   | 4                   |
| Accelerating Voltage:           | 15.00kV             |
| Magnification:                  | 35 x                |
| Working Distance:               | 10.0mm              |
| Specimen Tilt (degrees):        | 0.0                 |
| Elevation (degrees):            | 35.0                |
| Azimuth (degrees):              | 0.0                 |
| Number Of Channels:             | 2048                |
| Energy Range (keV):             | 20 keV              |
| Energy per Channel (eV):        | 10.0eV              |
| Detector Type Id:               | 29                  |
| Detector Type:                  | X-Max               |
| Window Type:                    | SATW                |
| Pulse Pile Up Correction:       | Succeeded           |
| Primary Detector:               | 2617                |
| Primary Detector Serial Number: | 77871-X080          |

| Element | Line Type | Apparent Concentration | k Ratio | Wt%   | Wt% Sigma | Atomic % | Standard Label | Factory Standard | Standard Calibration Date |
|---------|-----------|------------------------|---------|-------|-----------|----------|----------------|------------------|---------------------------|
| C       | K series  | 13.54                  | 0.13536 | 74.07 | 0.46      | 79.83    | C Vit          | Yes              |                           |
| O       | K series  | 3.80                   | 0.01280 | 23.58 | 0.46      | 19.08    | SiO2           | Yes              |                           |
| Na      | K         | 0.39                   | 0.0016  | 1.18  | 0.08      | 0.66     | Albite         | Yes              |                           |



|        |          |      |         |        |      |        |      |     |  |
|--------|----------|------|---------|--------|------|--------|------|-----|--|
|        | series   |      | 4       |        |      |        |      |     |  |
| S      | K series | 0.04 | 0.00032 | 0.14   | 0.04 | 0.06   | FeS2 | Yes |  |
| Cl     | K series | 0.27 | 0.00235 | 1.03   | 0.07 | 0.38   | NaCl | Yes |  |
| Total: |          |      |         | 100.00 |      | 100.00 |      |     |  |

Electron Image 28

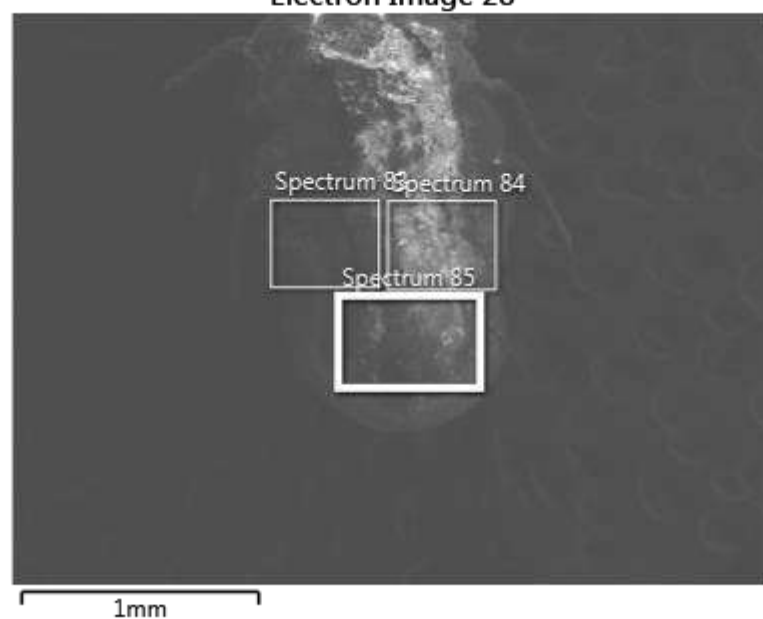

23/01/2020 13:20:00

Project 1

Rumania 10

Pecho 1 15 Kv

Electron Image 29

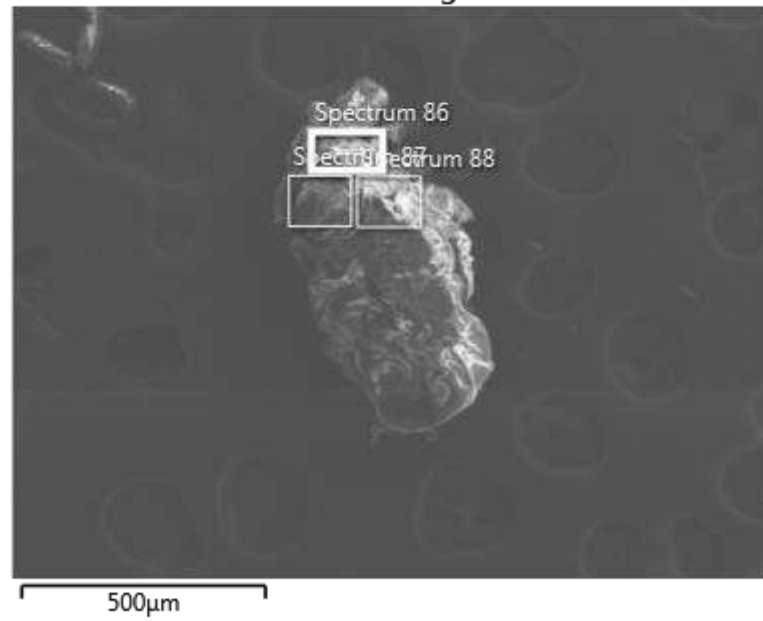

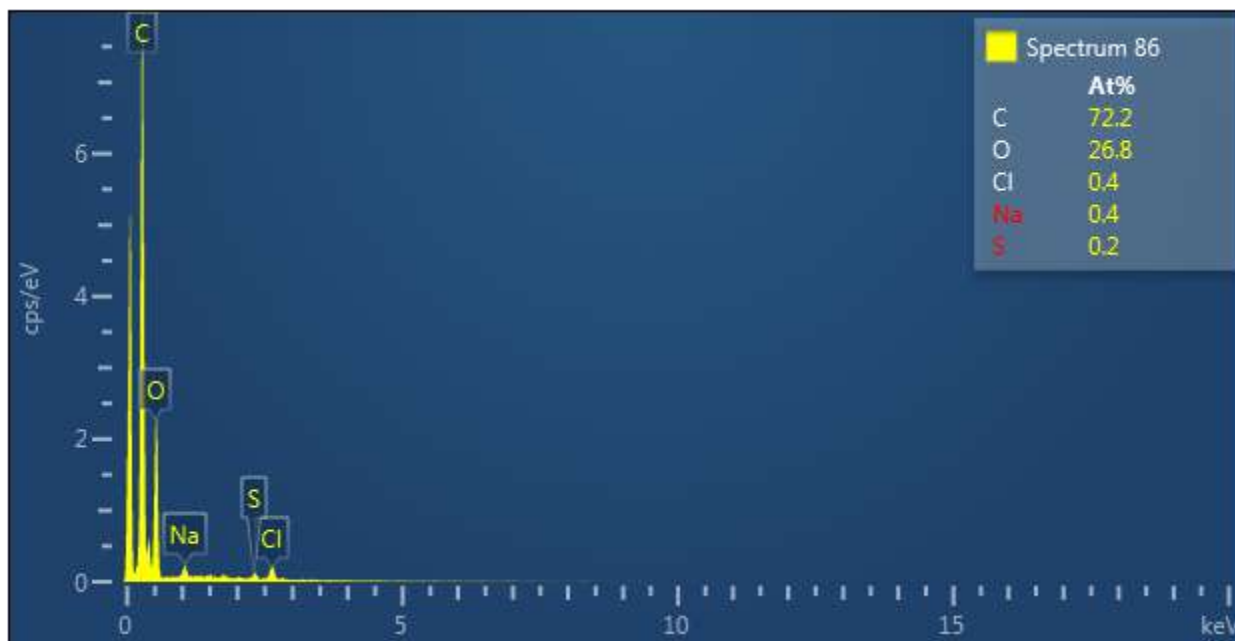

|                                 |                     |
|---------------------------------|---------------------|
| Label:                          | Spectrum 86         |
| Source:                         | Acquired            |
| Created:                        | 23/01/2020 13:20:00 |
| Livetime:                       | 60.0s               |
| Process Time:                   | 4                   |
| Accelerating Voltage:           | 15.00kV             |
| Magnification:                  | 72 x                |
| Working Distance:               | 10.0mm              |
| Specimen Tilt (degrees):        | 0.0                 |
| Elevation (degrees):            | 35.0                |
| Azimuth (degrees):              | 0.0                 |
| Number Of Channels:             | 2048                |
| Energy Range (keV):             | 20 keV              |
| Energy per Channel (eV):        | 10.0eV              |
| Detector Type Id:               | 29                  |
| Detector Type:                  | X-Max               |
| Window Type:                    | SATW                |
| Pulse Pile Up Correction:       | Succeeded           |
| Primary Detector:               | 2617                |
| Primary Detector Serial Number: | 77871-X080          |

| Element | Line Type | Apparent Concentration | k Ratio | Wt%   | Wt% Sigma | Atomic % | Standard Label | Factory Standard | Standard Calibration Date |
|---------|-----------|------------------------|---------|-------|-----------|----------|----------------|------------------|---------------------------|
| C       | K series  | 12.42                  | 0.12416 | 65.45 | 0.46      | 72.24    | C Vit          | Yes              |                           |
| O       | K series  | 6.72                   | 0.02261 | 32.29 | 0.46      | 26.75    | SiO2           | Yes              |                           |
| Na      | K         | 0.26                   | 0.0010  | 0.72  | 0.07      | 0.42     | Albite         | Yes              |                           |

|        |          |      |         |        |      |        |      |     |  |
|--------|----------|------|---------|--------|------|--------|------|-----|--|
|        | series   |      | 9       |        |      |        |      |     |  |
| S      | K series | 0.13 | 0.00113 | 0.42   | 0.05 | 0.18   | FeS2 | Yes |  |
| Cl     | K series | 0.33 | 0.00290 | 1.12   | 0.07 | 0.42   | NaCl | Yes |  |
| Total: |          |      |         | 100.00 |      | 100.00 |      |     |  |

Electron Image 29

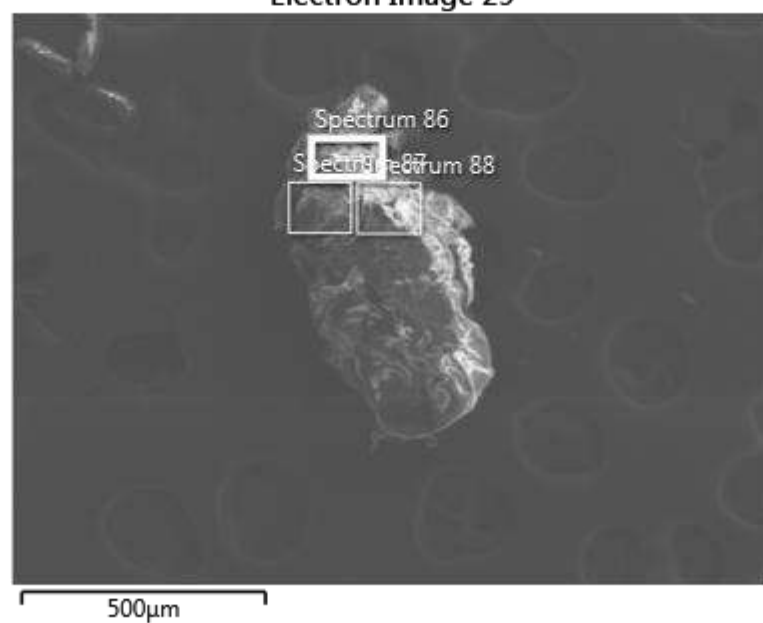

23/01/2020 13:21:11

Project 1

Rumania 10

Pecho 1 15 Kv

Electron Image 29

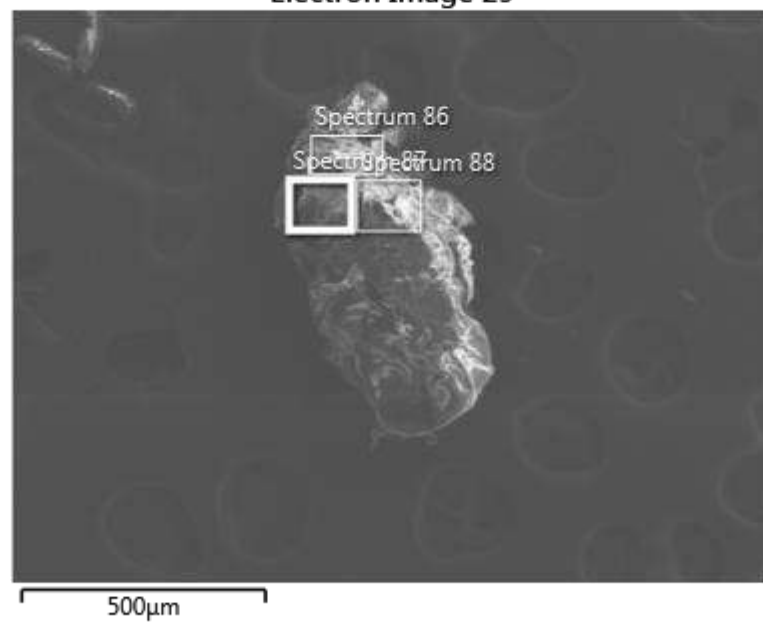

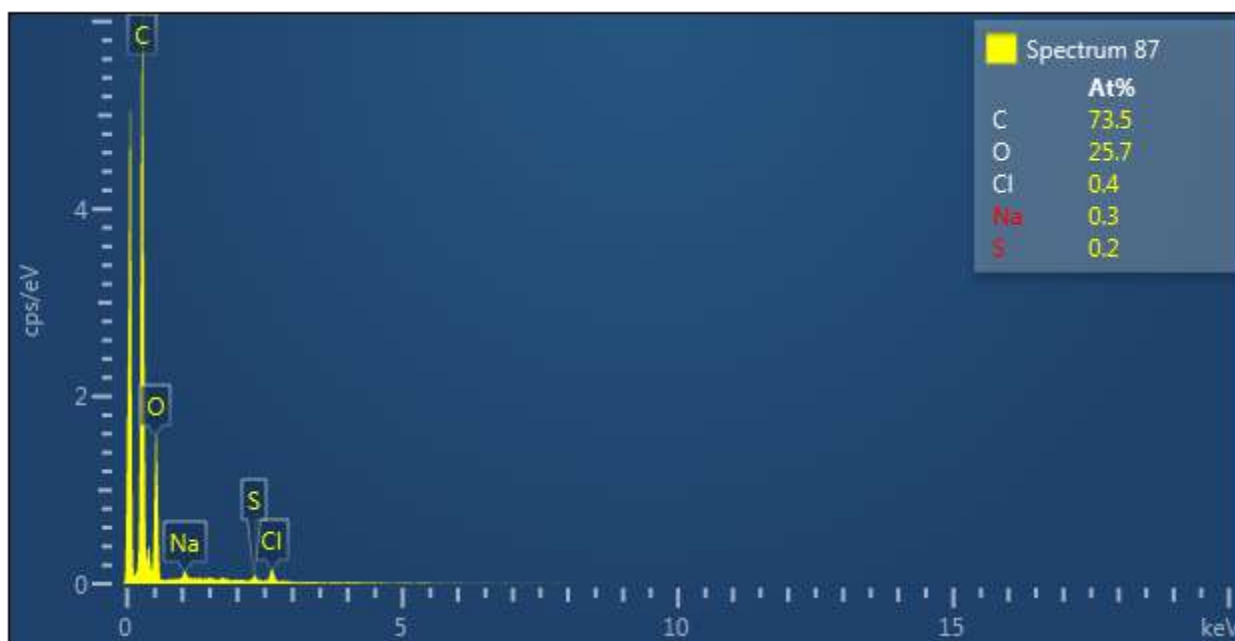

|                                 |                     |
|---------------------------------|---------------------|
| Label:                          | Spectrum 87         |
| Source:                         | Acquired            |
| Created:                        | 23/01/2020 13:21:11 |
| Livetime:                       | 60.3s               |
| Process Time:                   | 4                   |
| Accelerating Voltage:           | 15.00kV             |
| Magnification:                  | 72 x                |
| Working Distance:               | 10.0mm              |
| Specimen Tilt (degrees):        | 0.0                 |
| Elevation (degrees):            | 35.0                |
| Azimuth (degrees):              | 0.0                 |
| Number Of Channels:             | 2048                |
| Energy Range (keV):             | 20 keV              |
| Energy per Channel (eV):        | 10.0eV              |
| Detector Type Id:               | 29                  |
| Detector Type:                  | X-Max               |
| Window Type:                    | SATW                |
| Pulse Pile Up Correction:       | Succeeded           |
| Primary Detector:               | 2617                |
| Primary Detector Serial Number: | 77871-X080          |

| Element | Line Type | Apparent Concentration | k Ratio | Wt%   | Wt% Sigma | Atomic % | Standard Label | Factory Standard | Standard Calibration Date |
|---------|-----------|------------------------|---------|-------|-----------|----------|----------------|------------------|---------------------------|
| C       | K series  | 9.42                   | 0.09423 | 66.90 | 0.53      | 73.48    | C Vit          | Yes              |                           |
| O       | K series  | 4.60                   | 0.01549 | 31.13 | 0.53      | 25.67    | SiO2           | Yes              |                           |
| Na      | K         | 0.13                   | 0.0005  | 0.50  | 0.08      | 0.29     | Albite         | Yes              |                           |

|        |          |      |         |        |      |        |      |     |  |
|--------|----------|------|---------|--------|------|--------|------|-----|--|
|        | series   |      | 5       |        |      |        |      |     |  |
| S      | K series | 0.09 | 0.00077 | 0.40   | 0.06 | 0.16   | FeS2 | Yes |  |
| Cl     | K series | 0.23 | 0.00202 | 1.08   | 0.08 | 0.40   | NaCl | Yes |  |
| Total: |          |      |         | 100.00 |      | 100.00 |      |     |  |

Electron Image 29

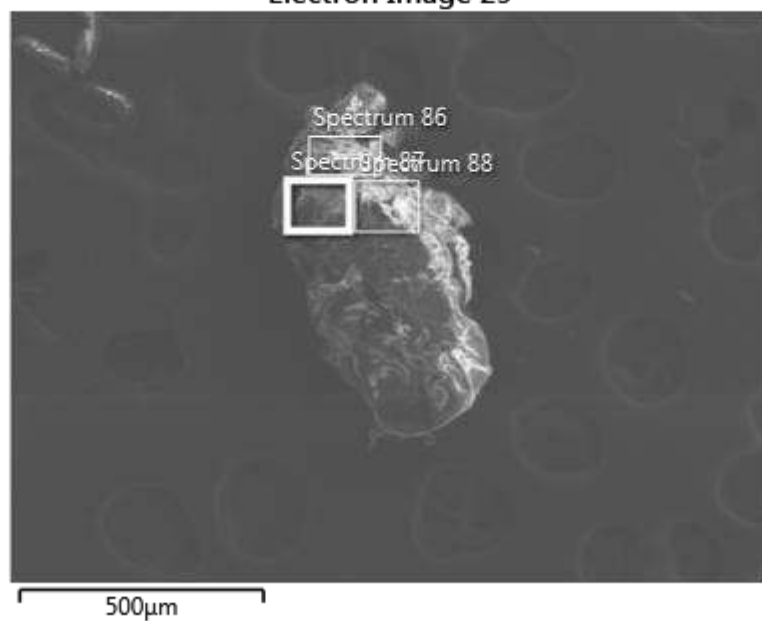

23/01/2020 13:22:22

Project 1

Rumania 10

Pecho 1 15 Kv

Electron Image 29

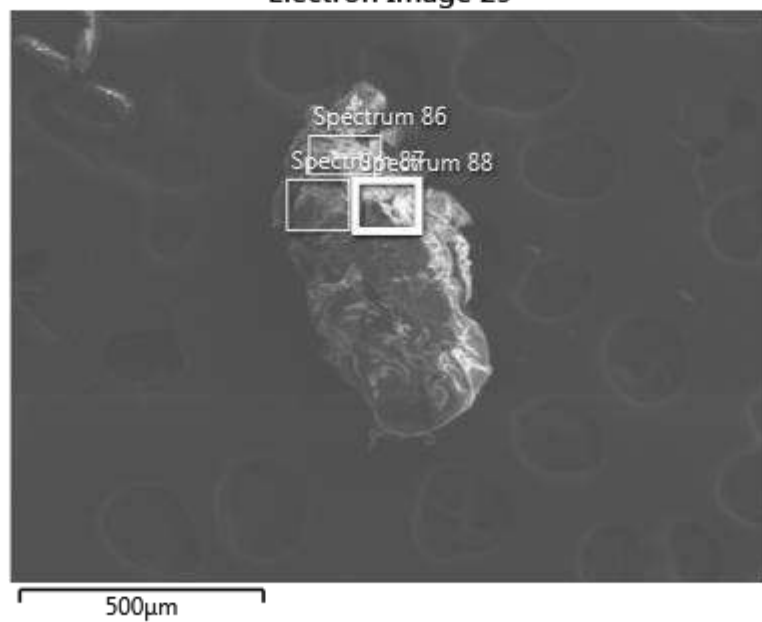



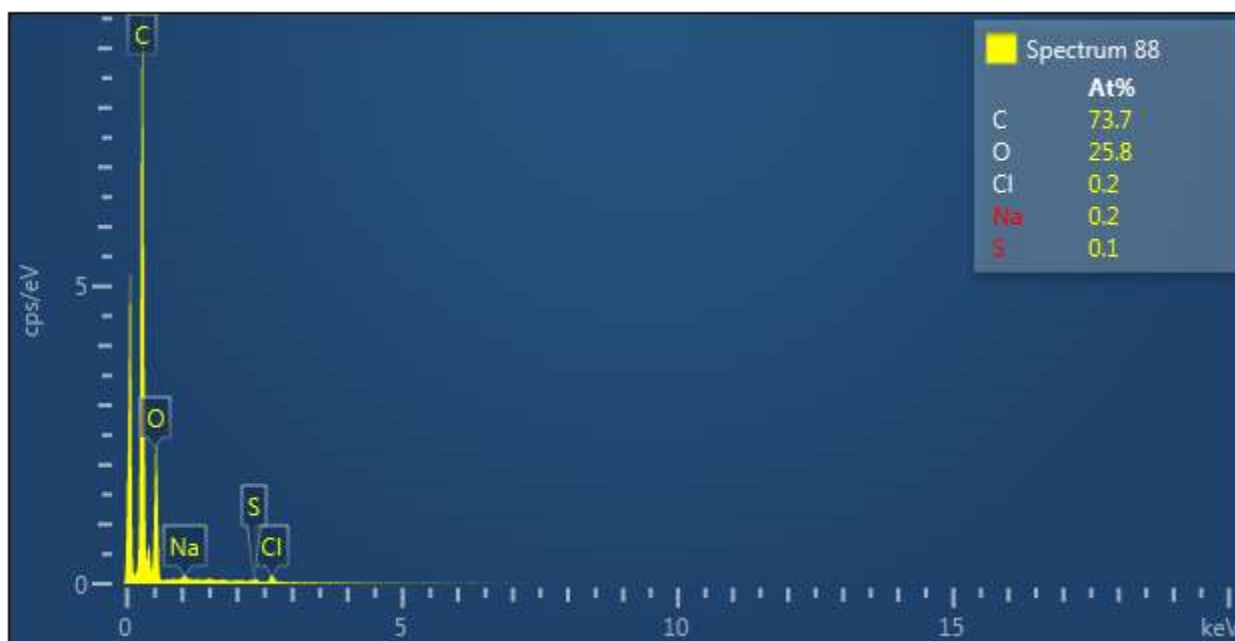

|                                 |                     |
|---------------------------------|---------------------|
| Label:                          | Spectrum 88         |
| Source:                         | Acquired            |
| Created:                        | 23/01/2020 13:22:22 |
| Livetime:                       | 60.3s               |
| Process Time:                   | 4                   |
| Accelerating Voltage:           | 15.00kV             |
| Magnification:                  | 72 x                |
| Working Distance:               | 10.0mm              |
| Specimen Tilt (degrees):        | 0.0                 |
| Elevation (degrees):            | 35.0                |
| Azimuth (degrees):              | 0.0                 |
| Number Of Channels:             | 2048                |
| Energy Range (keV):             | 20 keV              |
| Energy per Channel (eV):        | 10.0eV              |
| Detector Type Id:               | 29                  |
| Detector Type:                  | X-Max               |
| Window Type:                    | SATW                |
| Pulse Pile Up Correction:       | Succeeded           |
| Primary Detector:               | 2617                |
| Primary Detector Serial Number: | 77871-X080          |

| Element | Line Type | Apparent Concentration | k Ratio | Wt%   | Wt% Sigma | Atomic % | Standard Label | Factory Standard | Standard Calibration Date |
|---------|-----------|------------------------|---------|-------|-----------|----------|----------------|------------------|---------------------------|
| C       | K series  | 14.83                  | 0.14830 | 67.41 | 0.44      | 73.70    | C Vit          | Yes              |                           |
| O       | K series  | 6.74                   | 0.02268 | 31.43 | 0.44      | 25.79    | SiO2           | Yes              |                           |
| Na      | K         | 0.13                   | 0.0005  | 0.33  | 0.06      | 0.19     | Albite         | Yes              |                           |

|        |          |      |         |        |      |        |      |     |  |
|--------|----------|------|---------|--------|------|--------|------|-----|--|
|        | series   |      | 3       |        |      |        |      |     |  |
| S      | K series | 0.06 | 0.00051 | 0.18   | 0.04 | 0.08   | FeS2 | Yes |  |
| Cl     | K series | 0.20 | 0.00175 | 0.64   | 0.05 | 0.24   | NaCl | Yes |  |
| Total: |          |      |         | 100.00 |      | 100.00 |      |     |  |

Electron Image 29

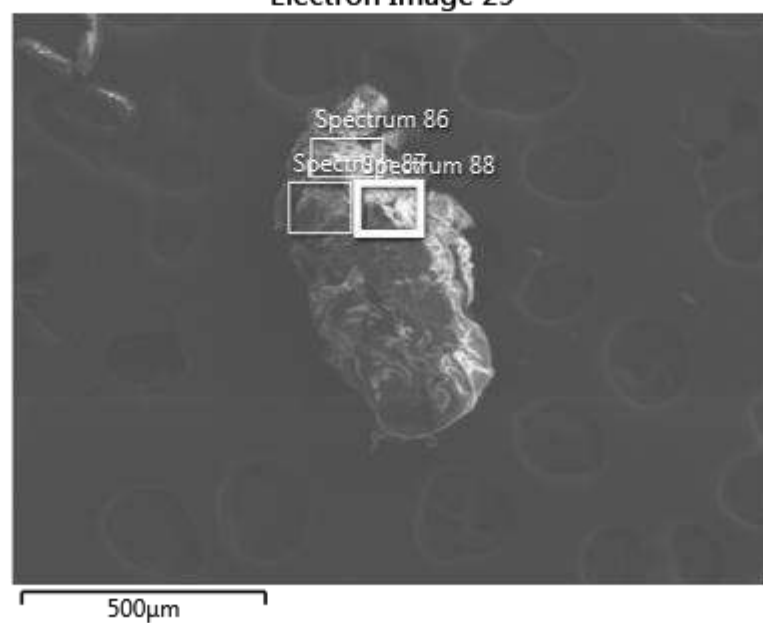

23/01/2020 13:24:03

Project 1

Rumania 10

Ventral 1 15 Kv

Electron Image 30

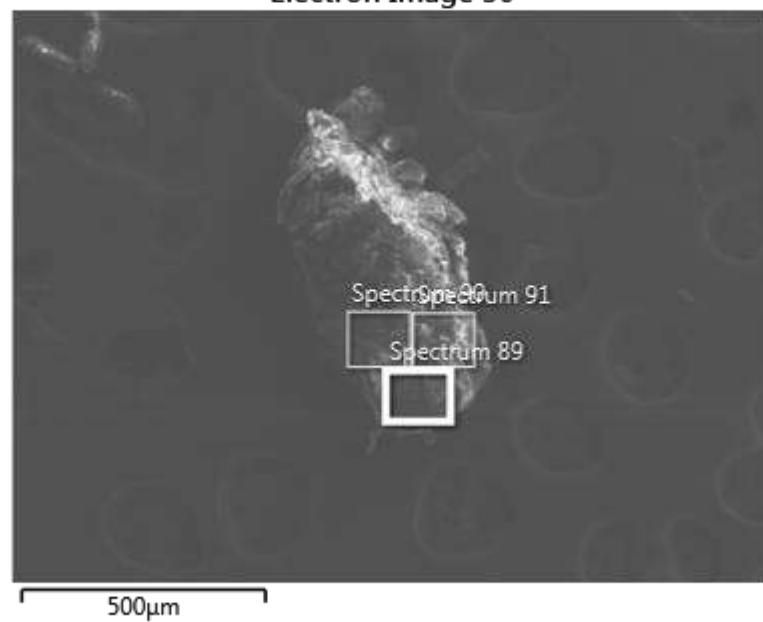

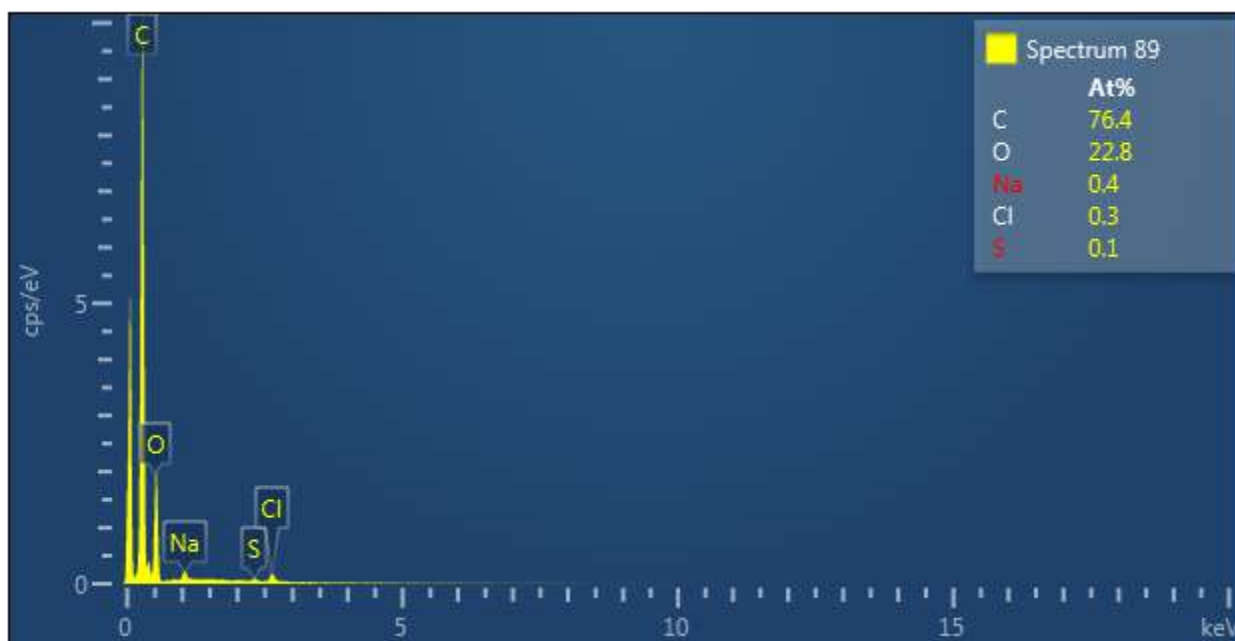

|                                 |                     |
|---------------------------------|---------------------|
| Label:                          | Spectrum 89         |
| Source:                         | Acquired            |
| Created:                        | 23/01/2020 13:24:03 |
| Livetime:                       | 60.3s               |
| Process Time:                   | 4                   |
| Accelerating Voltage:           | 15.00kV             |
| Magnification:                  | 72 x                |
| Working Distance:               | 10.0mm              |
| Specimen Tilt (degrees):        | 0.0                 |
| Elevation (degrees):            | 35.0                |
| Azimuth (degrees):              | 0.0                 |
| Number Of Channels:             | 2048                |
| Energy Range (keV):             | 20 keV              |
| Energy per Channel (eV):        | 10.0eV              |
| Detector Type Id:               | 29                  |
| Detector Type:                  | X-Max               |
| Window Type:                    | SATW                |
| Pulse Pile Up Correction:       | Succeeded           |
| Primary Detector:               | 2617                |
| Primary Detector Serial Number: | 77871-X080          |

| Element | Line Type | Apparent Concentration | k Ratio | Wt%   | Wt% Sigma | Atomic % | Standard Label | Factory Standard | Standard Calibration Date |
|---------|-----------|------------------------|---------|-------|-----------|----------|----------------|------------------|---------------------------|
| C       | K series  | 16.04                  | 0.16038 | 70.38 | 0.42      | 76.43    | C Vit          | Yes              |                           |
| O       | K series  | 5.93                   | 0.01996 | 28.01 | 0.42      | 22.84    | SiO2           | Yes              |                           |
| Na      | K         | 0.25                   | 0.0010  | 0.64  | 0.07      | 0.36     | Albite         | Yes              |                           |

|        |          |      |         |        |      |        |      |     |  |
|--------|----------|------|---------|--------|------|--------|------|-----|--|
|        | series   |      | 7       |        |      |        |      |     |  |
| S      | K series | 0.08 | 0.00072 | 0.25   | 0.05 | 0.10   | FeS2 | Yes |  |
| Cl     | K series | 0.23 | 0.00204 | 0.73   | 0.06 | 0.27   | NaCl | Yes |  |
| Total: |          |      |         | 100.00 |      | 100.00 |      |     |  |

Electron Image 30

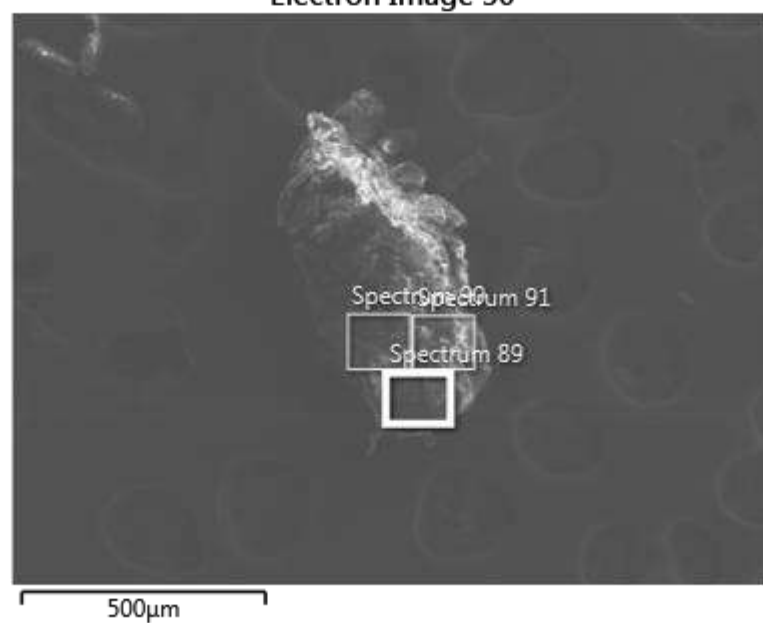

23/01/2020 13:25:14

Project 1

Rumania 10

Ventral 1 15 Kv

Electron Image 30

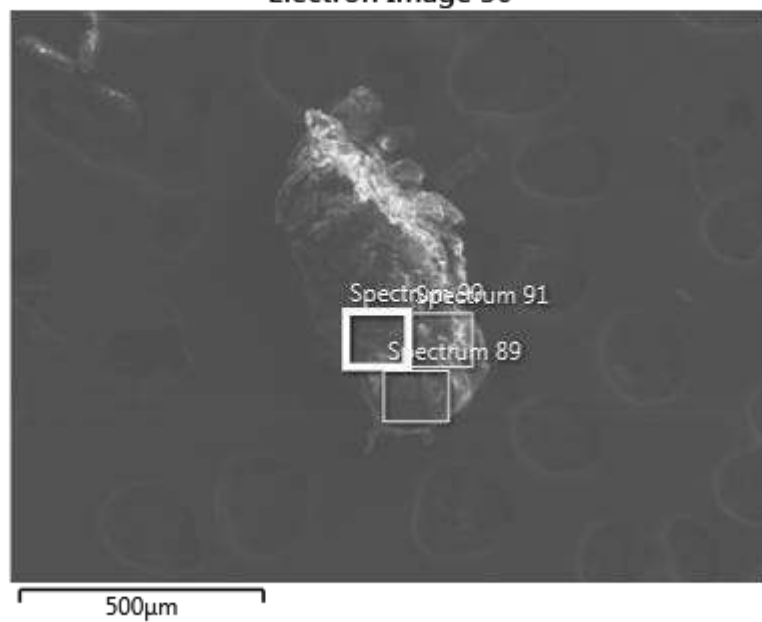

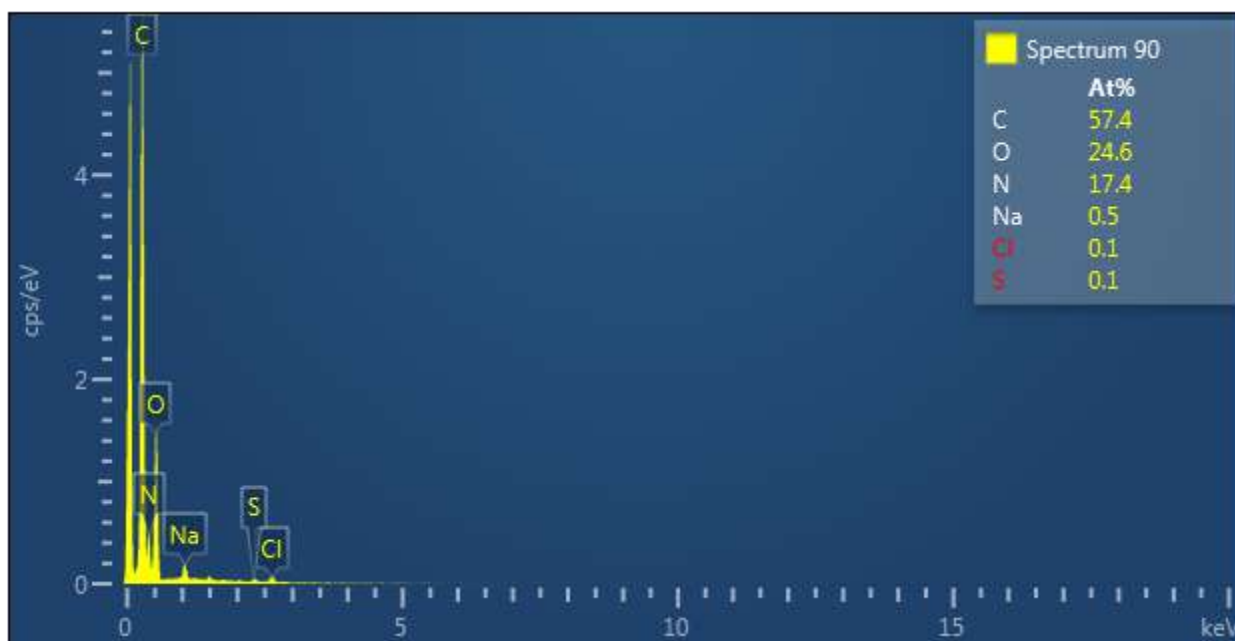

|                                 |                     |
|---------------------------------|---------------------|
| Label:                          | Spectrum 90         |
| Source:                         | Acquired            |
| Created:                        | 23/01/2020 13:25:14 |
| Livetime:                       | 60.3s               |
| Process Time:                   | 4                   |
| Accelerating Voltage:           | 15.00kV             |
| Magnification:                  | 72 x                |
| Working Distance:               | 10.0mm              |
| Specimen Tilt (degrees):        | 0.0                 |
| Elevation (degrees):            | 35.0                |
| Azimuth (degrees):              | 0.0                 |
| Number Of Channels:             | 2048                |
| Energy Range (keV):             | 20 keV              |
| Energy per Channel (eV):        | 10.0eV              |
| Detector Type Id:               | 29                  |
| Detector Type:                  | X-Max               |
| Window Type:                    | SATW                |
| Pulse Pile Up Correction:       | Succeeded           |
| Primary Detector:               | 2617                |
| Primary Detector Serial Number: | 77871-X080          |

| Element | Line Type | Apparent Concentration | k Ratio | Wt%   | Wt% Sigma | Atomic % | Standard Label | Factory Standard | Standard Calibration Date |
|---------|-----------|------------------------|---------|-------|-----------|----------|----------------|------------------|---------------------------|
| C       | K series  | 8.91                   | 0.08914 | 51.28 | 0.95      | 57.38    | C Vit          | Yes              |                           |
| N       | K series  | 3.83                   | 0.00682 | 18.09 | 1.32      | 17.36    | BN             | Yes              |                           |
| O       | K         | 4.45                   | 0.0149  | 29.23 | 0.68      | 24.55    | SiO2           | Yes              |                           |

|        |          |      |         |        |      |        |        |     |  |
|--------|----------|------|---------|--------|------|--------|--------|-----|--|
|        | series   |      | 7       |        |      |        |        |     |  |
| Na     | K series | 0.25 | 0.00106 | 0.84   | 0.08 | 0.49   | Albite | Yes |  |
| S      | K series | 0.05 | 0.00039 | 0.17   | 0.04 | 0.07   | FeS2   | Yes |  |
| Cl     | K series | 0.09 | 0.00083 | 0.38   | 0.05 | 0.14   | NaCl   | Yes |  |
| Total: |          |      |         | 100.00 |      | 100.00 |        |     |  |

Electron Image 30

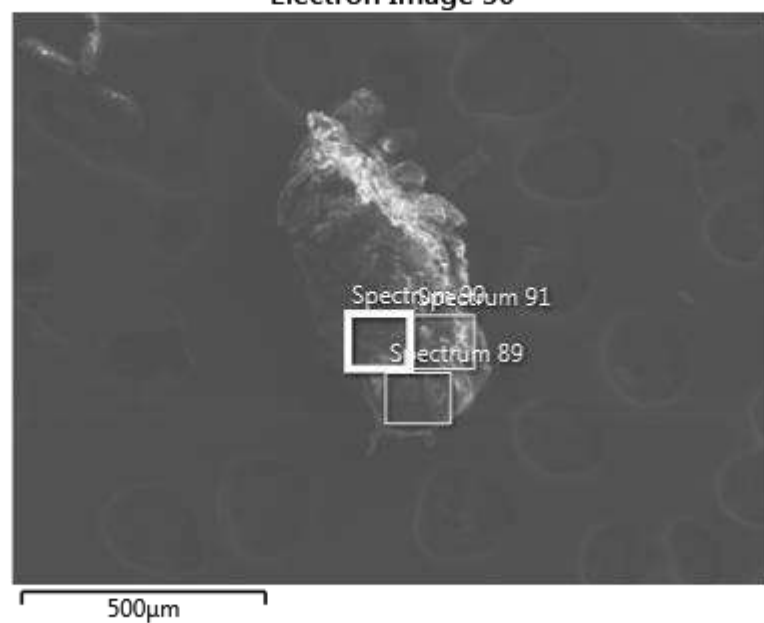



23/01/2020 13:26:26

Project 1

Rumania 10

Ventral 1 15 Kv

Electron Image 30

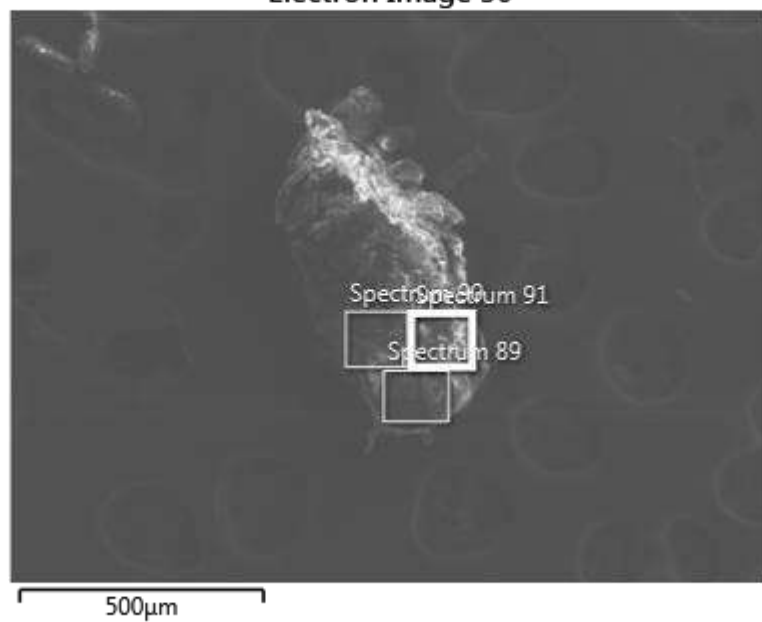

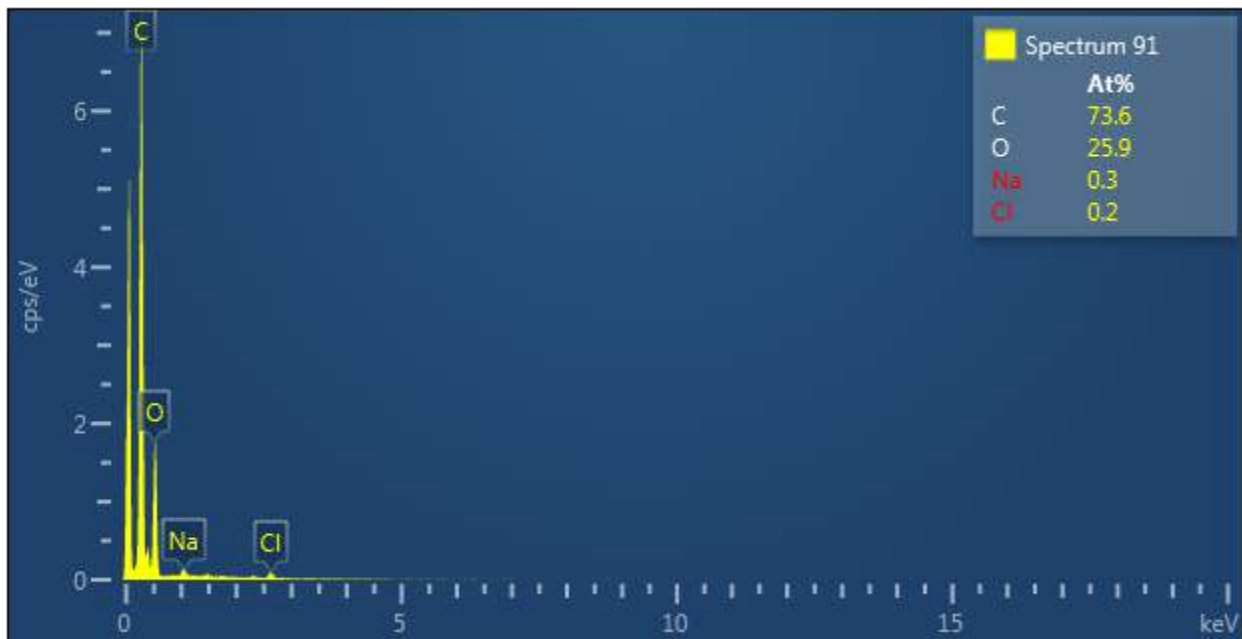

|                                 |                     |
|---------------------------------|---------------------|
| Label:                          | Spectrum 91         |
| Source:                         | Acquired            |
| Created:                        | 23/01/2020 13:26:26 |
| Livetime:                       | 60.1s               |
| Process Time:                   | 4                   |
| Accelerating Voltage:           | 15.00kV             |
| Magnification:                  | 72 x                |
| Working Distance:               | 10.0mm              |
| Specimen Tilt (degrees):        | 0.0                 |
| Elevation (degrees):            | 35.0                |
| Azimuth (degrees):              | 0.0                 |
| Number Of Channels:             | 2048                |
| Energy Range (keV):             | 20 keV              |
| Energy per Channel (eV):        | 10.0eV              |
| Detector Type Id:               | 29                  |
| Detector Type:                  | X-Max               |
| Window Type:                    | SATW                |
| Pulse Pile Up Correction:       | Succeeded           |
| Primary Detector:               | 2617                |
| Primary Detector Serial Number: | 77871-X080          |

| Element | Line Type | Apparent Concentration | k Ratio | Wt%   | Wt% Sigma | Atomic % | Standard Label | Factory Standard | Standard Calibration Date |
|---------|-----------|------------------------|---------|-------|-----------|----------|----------------|------------------|---------------------------|
| C       | K series  | 11.42                  | 0.11421 | 67.35 | 0.50      | 73.60    | C Vit          | Yes              |                           |
| O       | K series  | 5.13                   | 0.01728 | 31.56 | 0.50      | 25.89    | SiO2           | Yes              |                           |
| Na      | K         | 0.14                   | 0.0006  | 0.51  | 0.08      | 0.29     | Albite         | Yes              |                           |

|        |          |      |         |        |      |        |      |     |  |
|--------|----------|------|---------|--------|------|--------|------|-----|--|
|        | series   |      | 1       |        |      |        |      |     |  |
| Cl     | K series | 0.14 | 0.00120 | 0.59   | 0.06 | 0.22   | NaCl | Yes |  |
| Total: |          |      |         | 100.00 |      | 100.00 |      |     |  |

Electron Image 30

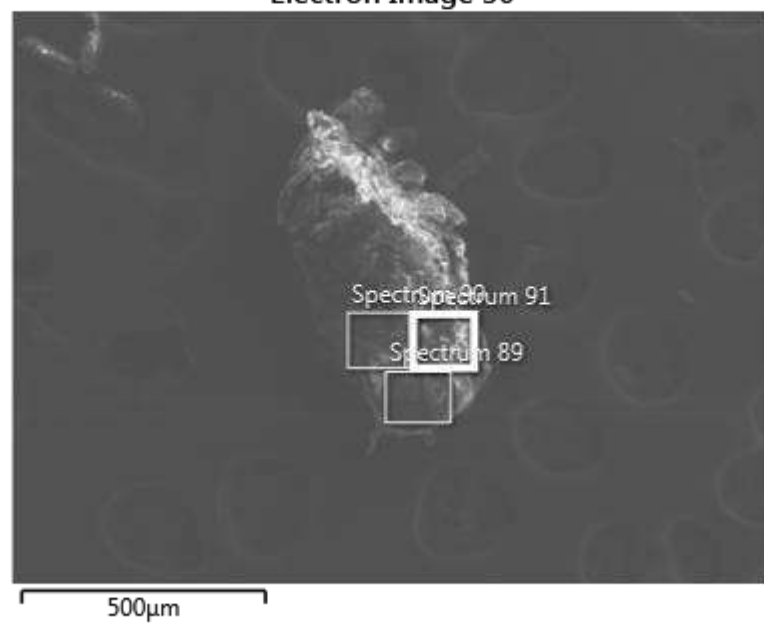

Supplement: Supplementary file [file 24755375]
